# Supplementary material for: Effect of Important Food Sources of Fructose-Containing Sugars on Inflammatory Biomarkers: A Systematic Review and Meta-Analysis of Controlled Feeding Trials
Source: MDPI journal article supplement (doi:10.3390/nu14193986), 2022-09-26
Supplement: s1 [file s1]

**Online supplement to “Effect of important sources of fructose-containing sugars on biomarkers of inflammation: a systematic review and meta-analysis of controlled trials”**

**Table of Contents**

|                                                                                                                                                                                                                                                                     |    |
|---------------------------------------------------------------------------------------------------------------------------------------------------------------------------------------------------------------------------------------------------------------------|----|
| Supplemental Tables .....                                                                                                                                                                                                                                           | 8  |
| Supplemental Table S1: PRISMA Checklist .....                                                                                                                                                                                                                       | 8  |
| Supplemental Table S2: Search strategy for controlled trials assessing the effect of important food sources of fructose-containing sugars on biomarkers of inflammation.....                                                                                        | 11 |
| Supplemental Table S3: PICOTS framework of the search strategy .....                                                                                                                                                                                                | 13 |
| Supplemental Table S4: Food source definitions .....                                                                                                                                                                                                                | 14 |
| Supplemental Table S5: Trial characteristics .....                                                                                                                                                                                                                  | 15 |
| Supplemental Table S6: Sensitivity analyses of the use of correlation coefficients of 0.25 and 0.75 for crossover trials in the primary analysis of the effect of important food sources of fructose-containing sugars on biomarkers of inflammation outcomes ..... | 35 |
| Supplemental Table S7: GRADE certainty of evidence assessment* for the effect of fructose-containing sugars on biomarkers of inflammation by energy control .....                                                                                                   | 39 |
| Supplemental Table S8: GRADE certainty of evidence assessment* for the effect of fructose-containing sugars on biomarkers of inflammation by important food source of fructose-containing sugars .....                                                              | 42 |
| Supplemental Figure S1: Risk of bias proportion graph for the effect of important food sources of fructose-containing sugars on CRP (mg/L) in substitution trials .....                                                                                             | 47 |
| Supplemental Figure S2: Risk of bias proportion graph for the effect of important food sources of fructose-containing sugars on CRP (mg/L) in addition trials.....                                                                                                  | 47 |
| Supplemental Figure S3: Risk of bias proportion graph for the effect of important food sources of fructose-containing sugars on CRP (mg/L) in subtraction trials .....                                                                                              | 48 |
| Supplemental Figure S4: Risk of bias proportion graph for the effect of important food sources of fructose-containing sugars on CRP (mg/L) in ad libitum trials.....                                                                                                | 48 |
| Supplemental Figure S5: Risk of bias proportion graph for the effect of important food sources of fructose-containing sugars on TNF- $\alpha$ (pg/mL) trials in substitution trials.....                                                                            | 49 |
| Supplemental Figure S6: Risk of bias proportion graph for the effect of important food sources of fructose-containing sugars on TNF- $\alpha$ (pg/mL) in addition trials .....                                                                                      | 49 |
| Supplemental Figure S7: Risk of bias proportion graph for the effect of important food sources of fructose-containing sugars on IL-6 (pg/mL) in substitution trials.....                                                                                            | 50 |
| Supplemental Figure S8: Risk of bias proportion graph for the effect of important food sources of fructose-containing sugars on IL-6 (pg/mL) in addition trials .....                                                                                               | 50 |
| Supplemental Figure S9: Forest plot of controlled trials of the effect of important food sources of fructose-containing sugars on CRP (mg/L) in substitution trials.....                                                                                            | 51 |
| Supplemental Figure S10: Forest plot of controlled trials of the effect of important food sources of fructose-containing sugars on CRP (mg/L) in addition trials.....                                                                                               | 53 |

|                                                                                                                                                                                                                               |    |
|-------------------------------------------------------------------------------------------------------------------------------------------------------------------------------------------------------------------------------|----|
| Supplemental Figure S11: Forest plot of controlled trials of the effect of important food sources of fructose-containing sugars on CRP (mg/L) in subtraction trials .....                                                     | 55 |
| Supplemental Figure S12: Forest plot of controlled trials of the effect of important food sources of fructose-containing sugars on CRP (mg/L) <i>ad libitum</i> trials.....                                                   | 56 |
| Supplemental Figure S13: Forest plot of controlled trials of the effect of important food sources of fructose-containing sugars on TNF- $\alpha$ (pg/mL) trials in substitution trials.....                                   | 57 |
| Supplemental Figure S14: Forest plot of controlled trials of the effect of important food sources of fructose-containing sugars on TNF- $\alpha$ (pg/mL) trials in addition trials .....                                      | 59 |
| Supplemental Figure S15: Forest plot of controlled trials of the effect of important food sources of fructose-containing sugars on IL-6 (pg/mL) in substitution trials.....                                                   | 61 |
| Supplemental Figure S16: Forest plot of controlled trials of the effect of important food sources of fructose-containing sugars on IL-6 in addition trials.....                                                               | 63 |
| Supplemental Figure S17: Sensitivity analysis of the systematic removal of each trial for the effect of important food sources of fructose-containing sugars on CRP (mg/L) in substitution trials.....                        | 65 |
| Supplemental Figure S18: Sensitivity analysis of the systematic removal of each trial for the effect of important food sources of fructose-containing sugars on CRP (mg/L) in addition trials .....                           | 66 |
| Supplemental Figure S19: Sensitivity analysis of the systematic removal of each trial in the primary analysis of the effect of important food sources of fructose-containing sugars on CRP (mg/L) in subtraction trials ..... | 67 |
| Supplemental Figure S20: Sensitivity analysis of the systematic removal of each trial for the effect of important food sources of fructose-containing sugars on CRP (mg/L) in <i>ad libitum</i> trials .....                  | 67 |
| Supplemental Figure S21: Sensitivity analysis of the systematic removal of each trial for the effect of SSB on CRP (mg/L) in substitution trials .....                                                                        | 68 |
| Supplemental Figure S22: Sensitivity analysis of the systematic removal of each trial for the effect of sweetened dairy on CRP (mg/L) in substitution trials.....                                                             | 68 |
| Supplemental Figure S23: Sensitivity analysis of the systematic removal of each trial for the effect of 100% fruit juice on CRP (mg/L) in substitution trials .....                                                           | 69 |
| Supplemental Figure S24: Sensitivity analysis of the systematic removal of each trial for the effect of fruit on CRP (mg/L) in substitution trials.....                                                                       | 69 |
| Supplemental Figure S25: Sensitivity analysis of the systematic removal of each trial for the effect of dried fruit on CRP (mg/L) in substitution trials .....                                                                | 70 |
| Supplemental Figure S26: Sensitivity analysis of the systematic removal of each trial for the effect of mixed sources (with SSBs) on CRP (mg/L) in substitution trials.....                                                   | 70 |
| Supplemental Figure S27: Sensitivity analysis of the systematic removal of each trial for the effect of mixed sources (without SSBs) on CRP (mg/L) in substitution trials .....                                               | 71 |
| Supplemental Figure S28: Sensitivity analysis of the systematic removal of each trial for the effect of SSB on CRP (mg/L) in addition trials .....                                                                            | 71 |

|                                                                                                                                                                                                                   |    |
|-------------------------------------------------------------------------------------------------------------------------------------------------------------------------------------------------------------------|----|
| Supplemental Figure S29: Sensitivity analysis of the systematic removal of each trial for the effect of sweetened dairy alternatives (soy) on CRP (mg/L) in addition trials .....                                 | 72 |
| Supplemental Figure S30: Sensitivity analysis of the systematic removal of each trial for the effect of 100% fruit juice on CRP (mg/L) in addition trials .....                                                   | 72 |
| Supplemental Figure S31: Sensitivity analysis of the systematic removal of each trial for the effect of fruit on CRP (mg/L) in addition trials .....                                                              | 73 |
| Supplemental Figure S32: Sensitivity analysis of the systematic removal of each trial for the effect of dried fruit on CRP (mg/L) in addition trials .....                                                        | 73 |
| Supplemental Figure S33: Sensitivity analysis of the systematic removal of each trial for the effect of sweets and desserts on CRP (mg/L) in addition trials .....                                                | 74 |
| Supplemental Figure S34: Sensitivity analysis of the systematic removal of each trial for the effect of important food sources of fructose-containing sugars on TNF- $\alpha$ (pg/mL) in substitution trials..... | 74 |
| Supplemental Figure S35: Sensitivity analysis of the systematic removal of each trial for the effect of important food sources of fructose-containing sugars on TNF- $\alpha$ (pg/mL) in addition trials.....     | 75 |
| Supplemental Figure S36: Sensitivity analysis of the systematic removal of each trial for the effect of SSB on TNF-a (pg/mL) in addition trials.....                                                              | 76 |
| Supplemental Figure S37: Sensitivity analysis of the systematic removal of each trial for the effect of sweetened dairy on TNF-a (pg/mL) in addition trials .....                                                 | 76 |
| Supplemental Figure S38: Sensitivity analysis of the systematic removal of each trial for the effect of 100% fruit juice on TNF-a (pg/mL) in addition trials .....                                                | 76 |
| Supplemental Figure S39: Sensitivity analysis of the systematic removal of each trial for the effect of fruit on TNF-a (pg/mL) in addition trials .....                                                           | 77 |
| Supplemental Figure S40: Sensitivity analysis of the systematic removal of each trial for the effect of addition sweets and desserts on TNF-a (pg/mL) in addition trials.....                                     | 77 |
| Supplemental Figure S41: Sensitivity analysis of the systematic removal of each trial for the effect of added nutritive (caloric) sweeteners on TNF-a (pg/mL) in addition trials.....                             | 77 |
| Supplemental Figure S42: Sensitivity analysis of the systematic removal of each trial for the effect of important food sources of fructose-containing sugars on IL-6 (pg/mL) in substitution trials.....          | 78 |
| Supplemental Figure S43: Sensitivity analysis of the systematic removal of each trial for the effect of important food sources of fructose-containing sugars on IL-6 (pg/mL) on addition trials .....             | 79 |
| Supplemental Figure S44: Sensitivity analysis of the systematic removal of each trial for the effect of SSB on IL-6 (pg/mL) in addition trials .....                                                              | 80 |
| Supplemental Figure S45: Sensitivity analysis of the systematic removal of each trial for the effect of sweetened dairy on IL-6 (pg/mL) in addition trials.....                                                   | 80 |
| Supplemental Figure S46: Sensitivity analysis of the systematic removal of each trial for the effect of 100% fruit juice on IL-6 (pg/mL) in addition trials .....                                                 | 81 |

|                                                                                                                                                                                                                       |    |
|-----------------------------------------------------------------------------------------------------------------------------------------------------------------------------------------------------------------------|----|
| Supplemental Figure S47: Sensitivity analysis of the systematic removal of each trial for the effect of fruit on IL-6 (pg/mL) in addition trials.....                                                                 | 81 |
| Supplemental Figure S48 (part 1 of 3): Subgroup analyses for the effect of important food sources of fructose-containing sugars on CRP (mg/L) in substitution trials .....                                            | 82 |
| Supplemental Figure S48 (part 2 of 3): Subgroup analyses for the effect of important food sources of fructose-containing sugars on CRP (mg/L) in substitution trials .....                                            | 84 |
| Supplemental Figure S48 (part 3 of 3): Subgroup analyses for the effect of important food sources of fructose-containing sugars on CRP (mg/L) in substitution trials .....                                            | 85 |
| Supplemental Figure S49: Risk of bias (using The Cochrane Collaboration Tool) subgroup analysis for the effect of important food sources of fructose-containing sugars on CRP (mg/L) in substitution comparisons..... | 86 |
| Supplemental Figure S50 (part 1 of 3): Subgroup analyses for the effect of important food sources of fructose-containing sugars on CRP (mg/L) in addition trials.....                                                 | 87 |
| Supplemental Figure S50 (part 2 of 3): Subgroup analyses for the effect of important food sources of fructose-containing sugars on CRP (mg/L) in addition comparisons.....                                            | 88 |
| Supplemental Figure S50 (part 3 of 3): Subgroup analyses for the effect of important food sources of fructose-containing sugars on CRP (mg/L) in addition comparisons.....                                            | 89 |
| Supplemental Figure S51: Risk of bias (using The Cochrane Collaboration Tool) subgroup analysis for the effect of important food sources of fructose-containing sugars on CRP (mg/L) in addition trials .....         | 90 |
| Supplemental Figure S52: Continuous meta-regression analysis for the effect of important food sources of fructose-containing sugars on CRP (mg/L) in substitution trials .....                                        | 91 |
| Supplemental Figure S53: Continuous meta-regression analysis for the effect of important food sources of fructose-containing sugars on CRP (mg/L) in addition trials.....                                             | 91 |
| Supplemental Figure S54 (part 1 of 3): Subgroup analyses for the effect of SSB on CRP (mg/L) in substitution trials.....                                                                                              | 92 |
| Supplemental Figure S54 (part 2 of 3): Subgroup analyses for the effect of SSB on CRP (mg/L) in substitution trials.....                                                                                              | 93 |
| Supplemental Figure S54 (part 3 of 3): Subgroup analyses for the effect of SSB on CRP (mg/L) in substitution trials.....                                                                                              | 94 |
| Supplemental Figure S55: Risk of bias (using The Cochrane Collaboration Tool) subgroup analysis for the effect of SSB on CRP (mg/L) in substitution trials.....                                                       | 95 |
| Supplemental Figure S56 (part 1 of 3): Subgroup analyses for the effect of 100% fruit juice on CRP (mg/L) in addition trials .....                                                                                    | 96 |
| Supplemental Figure S56 (part 2 of 3): Subgroup analyses for the effect of 100% fruit juice on CRP (mg/L) in addition trials .....                                                                                    | 97 |
| Supplemental Figure S56 (part 3 of 3): Subgroup analyses for the effect of 100% fruit juice on CRP (mg/L) in addition trials .....                                                                                    | 98 |
| Supplemental Figure S57: Risk of bias (using The Cochrane Collaboration Tool) subgroup analysis for the effect of 100% fruit juice on CRP (mg/L) in addition trials.....                                              | 99 |



|                                                                                                                                                                                                                             |     |
|-----------------------------------------------------------------------------------------------------------------------------------------------------------------------------------------------------------------------------|-----|
| Supplemental Figure S58: Continuous meta-regression analysis for the effect SSB on CRP (mg/L) in substitution comparisons .....                                                                                             | 100 |
| Supplemental Figure S59: Continuous meta-regression analysis for the effect of 100% fruit juice on CRP (mg/L) in addition comparisons .....                                                                                 | 100 |
| Supplemental Figure S60 (part 1 of 3): Subgroup analyses for the effect of important food sources of fructose-containing sugars on TNF- $\alpha$ (pg/mL) in substitution trials.....                                        | 101 |
| Supplemental Figure S60 (part 2 of 3): Subgroup analyses for the effect of important food sources of fructose-containing sugars on TNF- $\alpha$ (pg/mL) in substitution trials.....                                        | 102 |
| Supplemental Figure S60 (part 3 of 3): Subgroup analyses for the effect of important food sources of fructose-containing sugars on TNF- $\alpha$ (pg/mL) in substitution trials.....                                        | 103 |
| Supplemental Figure S61: Risk of bias (using The Cochrane Collaboration Tool) subgroup analysis for the effect of important food sources of fructose-containing sugars on TNF- $\alpha$ (pg/mL) in substitution trials..... | 104 |
| Supplemental Figure S62 (part 1 of 3): Subgroup analyses for the effect of important food sources of fructose-containing sugars on TNF- $\alpha$ (pg/mL) in addition trials .....                                           | 105 |
| Supplemental Figure S62 (part 2 of 3): Subgroup analyses for the effect of important food sources of fructose-containing sugars on TNF- $\alpha$ (pg/mL) in addition trials .....                                           | 106 |
| Supplemental Figure S62 (part 3 of 3): Subgroup analyses for the effect of important food sources of fructose-containing sugars on TNF- $\alpha$ (pg/mL) in addition trials .....                                           | 107 |
| Supplemental Figure S63: Risk of bias (using The Cochrane Collaboration Tool) subgroup analysis for the effect of important food sources of fructose-containing sugars on TNF- $\alpha$ (pg/mL) in addition trials .....    | 108 |
| Supplemental Figure S64 (part 1 of 3): Subgroup analyses for the effect of important food sources of fructose-containing sugars on IL-6 (pg/mL) in substitution trials.....                                                 | 109 |
| Supplemental Figure S64 (part 2 of 3): Subgroup analyses for the effect of important food sources of fructose-containing sugars on IL-6 (pg/mL) in substitution trials.....                                                 | 110 |
| Supplemental Figure S64 (part 3 of 3): Subgroup analyses for the effect of important food sources of fructose-containing sugars on IL-6 (pg/mL) in substitution trials.....                                                 | 111 |
| Supplemental Figure S65: Risk of bias (using The Cochrane Collaboration Tool) subgroup analysis for the effect of important food sources of fructose-containing sugars on IL-6 (pg/mL) in substitution trials.....          | 112 |
| Supplemental Figure S66 (part 1 of 3): Subgroup analyses for the effect of important food sources of fructose-containing sugars on IL-6 (pg/mL) in addition trials .....                                                    | 113 |
| Supplemental Figure S66 (part 2 of 3): Subgroup analyses for the effect of important food sources of fructose-containing sugars on IL-6 (pg/mL) in addition trials .....                                                    | 114 |
| Supplemental Figure S66 (part 3 of 3): Subgroup analyses for the effect of important food sources of fructose-containing sugars on IL-6 (pg/mL) in addition trials .....                                                    | 115 |
| Supplemental Figure S67: Risk of bias (using The Cochrane Collaboration Tool) subgroup analysis for the effect of important food sources of fructose-containing sugars on IL-6 (pg/mL) in addition trials .....             | 116 |

|                                                                                                                                                                                                                                                             |     |
|-------------------------------------------------------------------------------------------------------------------------------------------------------------------------------------------------------------------------------------------------------------|-----|
| Supplemental Figure S68: Continuous meta-regression analysis for the effect of important food sources of fructose-containing sugars on TNF- $\alpha$ (pg/mL) in substitution trials.....                                                                    | 117 |
| Supplemental Figure S69: Continuous meta-regression analysis for the effect of important food sources of fructose-containing sugars on TNF- $\alpha$ (pg/mL) in addition trials .....                                                                       | 117 |
| Supplemental Figure S70: Continuous meta-regression analysis for the effect of important food sources of fructose-containing sugars on IL-6 (pg/mL) in substitution trials.....                                                                             | 118 |
| Supplemental Figure S71: Continuous meta-regression analysis for the effect of important food sources of fructose-containing sugars on IL-6 (pg/mL) in addition comparisons .....                                                                           | 118 |
| Supplemental Figure S72: Linear and non-linear meta-regression analyses for effect of important food sources of fructose-containing sugars on CRP (mg/L) in substitution trials .....                                                                       | 119 |
| Supplemental Figure S73: Linear and non-linear meta-regression analysis for the effect of important food sources of fructose-containing sugars on CRP (mg/L) in addition comparisons.....                                                                   | 120 |
| Supplemental Figure S74: Linear and non-linear meta-regression analyses for the effect of individual food sources of fructose-containing sugars dose on CRP (mg/L) in substitution trials .....                                                             | 121 |
| Supplemental Figure S75: Linear and non-linear meta-regression analyses for the effect of individual food sources of fructose-containing sugars dose on CRP (mg/L) in addition trials..                                                                     | 122 |
| Supplemental Figure S76: Non-linear dose-response analysis using public thresholds of 5% (panel A), 10% (panel B), and 25% (panel C) of energy for the effect of total food sources of fructose-containing sugars on CRP (mg/L) in substitution trials..... | 124 |
| Supplemental Figure S77: Non-linear dose-response analysis using public threshold of 5% (panel A), 10% (panel B), and 25% (panel C) energy for the effect of important food sources of fructose-containing sugars on CRP (mg/L) in addition trials .....    | 126 |
| Supplemental Figure S78: Non-linear dose-response analysis using public thresholds of 10% (panel A) of energy for the effect of the effect of SSBs on CRP (mg/L) in substitution trials ..                                                                  | 128 |
| Supplemental Figure S79: Non-linear dose-response analysis using public thresholds of 5%, 10% , and 25% of energy for the effect of the effect of SSBs on CRP (mg/L) in addition trials .....                                                               | 129 |
| Supplemental Figure S80: Non-linear dose-response analysis using public thresholds of 5%, 10% , and 25% of energy for the effect of 100% fruit juice on CRP (mg/L) in addition trials .....                                                                 | 130 |
| Supplemental Figure S81: Non-linear dose-response analysis using public thresholds of 5%, 10%, and 25% of energy for the effect of fruit on CRP (mg/L) in addition trials .....                                                                             | 132 |
| Supplemental Figure S82: Linear and non-linear meta-regression analyses for the effect of important food sources of fructose-containing sugars on TNF- $\alpha$ (pg/mL) in substitution trials.....                                                         | 134 |
| Supplemental Figure S83: Linear and non-linear meta-regression analyses for the effect of important food sources of fructose-containing sugars on TNF- $\alpha$ (pg/mL) in addition trials .....                                                            | 135 |
| Supplemental Figure S84: Linear and non-linear meta-regression analyses for the effect of important food sources of fructose-containing sugars on IL-6 (pg/mL) in substitution trials.....                                                                  | 136 |
| Supplemental Figure S85: Linear and non-linear meta-regression analyses for the effect of important food sources of fructose-containing sugars on IL-6 (pg/mL) in addition trials .....                                                                     | 137 |

|                                                                                                                                                                                                                                                                            |     |
|----------------------------------------------------------------------------------------------------------------------------------------------------------------------------------------------------------------------------------------------------------------------------|-----|
| Supplemental Figure S86: Non-linear dose-response analysis using public thresholds of 5% (panel A), 10% (panel B), and 25% (panel C) of energy for the effect of important food sources of fructose-containing sugars on TNF- $\alpha$ (pg/mL) in substitution trials..... | 138 |
| Supplemental Figure S87: Non-linear dose-response analysis using public thresholds of 5% (panel A), 10% (panel B), and 25% (panel C) of energy for the effect of important food sources of fructose-containing sugars on TNF- $\alpha$ (pg/mL) in addition trials .....    | 140 |
| Supplemental Figure S88: Non-linear dose-response analysis using public thresholds of 5% (panel A), 10% (panel B), and 25% (panel C) of energy for the effect of important food sources of fructose-containing sugars on IL-6 (pg/mL) in substitution trials.....          | 142 |
| Supplemental Figure S89: Non-linear dose-response analysis using public thresholds of 5% (panel A), 10% (panel B), and 25% (panel C) of energy for the effect of important food sources of fructose-containing sugars on IL-6 (pg/mL) addition trials .....                | 144 |
| Supplemental Figure S90: Publication bias funnel plots for the effect of important food sources of fructose-containing sugars on CRP (mg/L) in substitution trials .....                                                                                                   | 146 |
| Supplemental Figure S91: Publication bias funnel plots for the effect of important food sources of fructose-containing sugars on CRP (mg/L) in addition trials.....                                                                                                        | 147 |
| Supplemental Figure S92: Publication bias funnel plots for the effect of SSBs on CRP (mg/L) in substitution trials.....                                                                                                                                                    | 148 |
| Supplemental Figure S93: Publication bias funnel plots for the effect of 100% fruit juice on CRP (mg/L) in addition trials .....                                                                                                                                           | 149 |
| Supplemental Figure S94: Publication bias funnel plots for the effect of important food sources of fructose-containing sugars on TNF- $\alpha$ (pg/mL) in substitution trials.....                                                                                         | 150 |
| Supplemental Figure S95: Publication bias funnel plots for the effect of important food sources of fructose-containing sugars on TNF- $\alpha$ (pg/mL) in addition trials .....                                                                                            | 151 |
| Supplemental Figure S96: Publication bias funnel plots for the effect of important food sources of fructose-containing sugars on IL-6 (pg/mL) in substitution trials.....                                                                                                  | 152 |
| Supplemental Figure S97: Publication bias funnel plots for the effect of important food sources of fructose-containing sugars on IL-6 (pg/mL) in addition trials .....                                                                                                     | 153 |
| Supplemental Figure S98: Trim and Fill funnel plot for the effect of important food sources of fructose-containing sugars IL-6 (pg/mL) in substitution trials .....                                                                                                        | 154 |
| Supplemental Figure S99: Trim and Fill funnel plot for the effect of important food sources of fructose-containing sugars IL-6 (pg/mL) in addition trials.....                                                                                                             | 155 |

## Supplemental Tables

**Supplemental Table S1: PRISMA Checklist**

| Section and Topic             | Item # | Checklist item                                                                                                                                                                                                                                                                                       | Location where item is reported   |
|-------------------------------|--------|------------------------------------------------------------------------------------------------------------------------------------------------------------------------------------------------------------------------------------------------------------------------------------------------------|-----------------------------------|
| <b>TITLE</b>                  |        |                                                                                                                                                                                                                                                                                                      |                                   |
| Title                         | 1      | Identify the report as a systematic review.                                                                                                                                                                                                                                                          | Page 1                            |
| <b>ABSTRACT</b>               |        |                                                                                                                                                                                                                                                                                                      |                                   |
| Abstract                      | 2      | See the PRISMA 2020 for Abstracts checklist.                                                                                                                                                                                                                                                         | Page 2-3                          |
| <b>INTRODUCTION</b>           |        |                                                                                                                                                                                                                                                                                                      |                                   |
| Rationale                     | 3      | Describe the rationale for the review in the context of existing knowledge.                                                                                                                                                                                                                          | Page 4-5                          |
| Objectives                    | 4      | Provide an explicit statement of the objective(s) or question(s) the review addresses.                                                                                                                                                                                                               | Page 5                            |
| <b>METHODS</b>                |        |                                                                                                                                                                                                                                                                                                      |                                   |
| Eligibility criteria          | 5      | Specify the inclusion and exclusion criteria for the review and how studies were grouped for the syntheses.                                                                                                                                                                                          | Page 5-6                          |
| Information sources           | 6      | Specify all databases, registers, websites, organisations, reference lists and other sources searched or consulted to identify studies. Specify the date when each source was last searched or consulted.                                                                                            | Page 5                            |
| Search strategy               | 7      | Present the full search strategies for all databases, registers and websites, including any filters and limits used.                                                                                                                                                                                 | Page 5, Supplemental Tables S2-S3 |
| Selection process             | 8      | Specify the methods used to decide whether a study met the inclusion criteria of the review, including how many reviewers screened each record and each report retrieved, whether they worked independently, and if applicable, details of automation tools used in the process.                     | Page 5-7                          |
| Data collection process       | 9      | Specify the methods used to collect data from reports, including how many reviewers collected data from each report, whether they worked independently, any processes for obtaining or confirming data from study investigators, and if applicable, details of automation tools used in the process. | Page 7-9                          |
| Data items                    | 10a    | List and define all outcomes for which data were sought. Specify whether all results that were compatible with each outcome domain in each study were sought (e.g. for all measures, time points, analyses), and if not, the methods used to decide which results to collect.                        | Page 8-9                          |
|                               | 10b    | List and define all other variables for which data were sought (e.g. participant and intervention characteristics, funding sources). Describe any assumptions made about any missing or unclear information.                                                                                         | Page 7-9                          |
| Study risk of bias assessment | 11     | Specify the methods used to assess risk of bias in the included studies, including details of the tool(s) used, how many reviewers assessed each study and whether they worked independently, and if applicable, details of automation tools used in the process.                                    | Page 7-8                          |

| Section and Topic             | Item # | Checklist item                                                                                                                                                                                                                                              | Location where item is reported                      |
|-------------------------------|--------|-------------------------------------------------------------------------------------------------------------------------------------------------------------------------------------------------------------------------------------------------------------|------------------------------------------------------|
| Effect measures               | 12     | Specify for each outcome the effect measure(s) (e.g. risk ratio, mean difference) used in the synthesis or presentation of results.                                                                                                                         | Page 8                                               |
| Synthesis methods             | 13a    | Describe the processes used to decide which studies were eligible for each synthesis (e.g. tabulating the study intervention characteristics and comparing against the planned groups for each synthesis (item #5)).                                        | Page 8-10                                            |
|                               | 13b    | Describe any methods required to prepare the data for presentation or synthesis, such as handling of missing summary statistics, or data conversions.                                                                                                       | Page 8-10                                            |
|                               | 13c    | Describe any methods used to tabulate or visually display results of individual studies and syntheses.                                                                                                                                                      | Page 8-10                                            |
|                               | 13d    | Describe any methods used to synthesize results and provide a rationale for the choice(s). If meta-analysis was performed, describe the model(s), method(s) to identify the presence and extent of statistical heterogeneity, and software package(s) used. | Page 8-10                                            |
|                               | 13e    | Describe any methods used to explore possible causes of heterogeneity among study results (e.g. subgroup analysis, meta-regression).                                                                                                                        | Page 8-10                                            |
|                               | 13f    | Describe any sensitivity analyses conducted to assess robustness of the synthesized results.                                                                                                                                                                | Page 8-10                                            |
| Reporting bias assessment     | 14     | Describe any methods used to assess risk of bias due to missing results in a synthesis (arising from reporting biases).                                                                                                                                     | Page 7                                               |
| Certainty assessment          | 15     | Describe any methods used to assess certainty (or confidence) in the body of evidence for an outcome.                                                                                                                                                       | Page 10-11                                           |
| <b>RESULTS</b>                |        |                                                                                                                                                                                                                                                             |                                                      |
| Study selection               | 16a    | Describe the results of the search and selection process, from the number of records identified in the search to the number of studies included in the review, ideally using a flow diagram.                                                                | Page 11-12, Figure 1                                 |
|                               | 16b    | Cite studies that might appear to meet the inclusion criteria, but which were excluded, and explain why they were excluded.                                                                                                                                 | Page 11-12, Figure 1                                 |
| Study characteristics         | 17     | Cite each included study and present its characteristics.                                                                                                                                                                                                   | Page 12, Table 1, Supplemental Table S5              |
| Risk of bias in studies       | 18     | Present assessments of risk of bias for each included study.                                                                                                                                                                                                | Page 13, Supplemental Figures S1-S8                  |
| Results of individual studies | 19     | For all outcomes, present, for each study: (a) summary statistics for each group (where appropriate) and (b) an effect estimate and its precision (e.g. confidence/credible interval), ideally using structured tables or plots.                            | Page 14-15, Figures 2-4, Supplemental Figures S9-S16 |
|                               | 20a    | For each synthesis, briefly summarise the characteristics and risk of bias among contributing studies.                                                                                                                                                      | Page 12-13                                           |

| Section and Topic                              | Item # | Checklist item                                                                                                                                                                                                                                                                       | Location where item is reported                      |
|------------------------------------------------|--------|--------------------------------------------------------------------------------------------------------------------------------------------------------------------------------------------------------------------------------------------------------------------------------------|------------------------------------------------------|
| Results of syntheses                           | 20b    | Present results of all statistical syntheses conducted. If meta-analysis was done, present for each the summary estimate and its precision (e.g. confidence/credible interval) and measures of statistical heterogeneity. If comparing groups, describe the direction of the effect. | Page 14-15, Figures 2-4, Supplemental Figures S9-S16 |
|                                                | 20c    | Present results of all investigations of possible causes of heterogeneity among study results.                                                                                                                                                                                       | Page 15-18                                           |
|                                                | 20d    | Present results of all sensitivity analyses conducted to assess the robustness of the synthesized results.                                                                                                                                                                           | Page 15-20                                           |
| Reporting biases                               | 21     | Present assessments of risk of bias due to missing results (arising from reporting biases) for each synthesis assessed.                                                                                                                                                              | Page 13, 15-18                                       |
| Certainty of evidence                          | 22     | Present assessments of certainty (or confidence) in the body of evidence for each outcome assessed.                                                                                                                                                                                  | Page 20-21                                           |
| <b>DISCUSSION</b>                              |        |                                                                                                                                                                                                                                                                                      |                                                      |
| Discussion                                     | 23a    | Provide a general interpretation of the results in the context of other evidence.                                                                                                                                                                                                    | Page 21-25                                           |
|                                                | 23b    | Discuss any limitations of the evidence included in the review.                                                                                                                                                                                                                      | Page 27-28                                           |
|                                                | 23c    | Discuss any limitations of the review processes used.                                                                                                                                                                                                                                | Page 27-28                                           |
|                                                | 23d    | Discuss implications of the results for practice, policy, and future research.                                                                                                                                                                                                       | Page 28-29                                           |
| <b>OTHER INFORMATION</b>                       |        |                                                                                                                                                                                                                                                                                      |                                                      |
| Registration and protocol                      | 24a    | Provide registration information for the review, including register name and registration number, or state that the review was not registered.                                                                                                                                       | Page 5                                               |
|                                                | 24b    | Indicate where the review protocol can be accessed, or state that a protocol was not prepared.                                                                                                                                                                                       | Page 5                                               |
|                                                | 24c    | Describe and explain any amendments to information provided at registration or in the protocol.                                                                                                                                                                                      | Page 5                                               |
| Support                                        | 25     | Describe sources of financial or non-financial support for the review, and the role of the funders or sponsors in the review.                                                                                                                                                        | Page 30-31                                           |
| Competing interests                            | 26     | Declare any competing interests of review authors.                                                                                                                                                                                                                                   | Page 31-37                                           |
| Availability of data, code and other materials | 27     | Report which of the following are publicly available and where they can be found: template data collection forms; data extracted from included studies; data used for all analyses; analytic code; any other materials used in the review.                                           | Page 31                                              |

N/A=not applicable.

Table obtained from Page et al. 2021.<sup>1</sup>

1. Page MJ, Moher D, Bossuyt PM, et al. PRISMA 2020 explanation and elaboration: updated guidance and exemplars for reporting systematic reviews. BMJ 2021;372:n160. doi: 10.1136/bmj.n160 [published Online First: 2021/03/31]

**Supplemental Table S2: Search strategy for controlled trials assessing the effect of important food sources of fructose-containing sugars on biomarkers of inflammation**

| Database and search terms                                                                    |                                                                                              |                                                                                              |
|----------------------------------------------------------------------------------------------|----------------------------------------------------------------------------------------------|----------------------------------------------------------------------------------------------|
| MEDLINE                                                                                      | EMBASE                                                                                       | The Cochrane Library of Controlled Trials                                                    |
| 1 exp fructose/                                                                              | 1 exp fructose/                                                                              | 1 exp fructose/                                                                              |
| 2 fructose.mp.                                                                               | 2 fructose.mp.                                                                               | 2 fructose.mp.                                                                               |
| 3 exp sucrose/                                                                               | 3 exp sucrose/                                                                               | 3 exp sucrose/                                                                               |
| 4 sucrose.mp.                                                                                | 4 sucrose.mp.                                                                                | 4 sucrose.mp.                                                                                |
| 5 sugar*.mp.                                                                                 | 5 sugar*.mp.                                                                                 | 5 sugar*.mp.                                                                                 |
| 6 SSB.mp.                                                                                    | 6 SSB.mp.                                                                                    | 6 SSB.mp.                                                                                    |
| 7 sweetened.mp.                                                                              | 7 sweetened.mp.                                                                              | 7 sweetened.mp.                                                                              |
| 8 exp soft drink/                                                                            | 8 exp soft drink/                                                                            | 8 exp soft drink/                                                                            |
| 9 soft drink*.mp.                                                                            | 9 soft drink*.mp.                                                                            | 9 soft drink*.mp.                                                                            |
| 10 cola.mp.                                                                                  | 10 cola.mp.                                                                                  | 10 cola.mp.                                                                                  |
| 11 exp Honey/                                                                                | 11 exp Honey/                                                                                | 11 exp honey/                                                                                |
| 12 honey.mp.                                                                                 | 12 honey.mp.                                                                                 | 12 honey.mp.                                                                                 |
| 13 exp fruit/                                                                                | 13 exp fruit/                                                                                | 13 exp fruit/                                                                                |
| 14 fruit.mp.                                                                                 | 14 fruit.mp.                                                                                 | 14 fruit.mp.                                                                                 |
| 15 exp carbonated beverage/                                                                  | 15 exp carbonated beverage/                                                                  | 15 exp carbonated beverages/                                                                 |
| 16 carbonated beverage*.mp.                                                                  | 16 carbonated beverage*.mp.                                                                  | 16 carbonated beverage*.mp.                                                                  |
| 17 exp energy drink/                                                                         | 17 exp energy drink/                                                                         | 17 exp energy drinks/                                                                        |
| 18 energy drink*.mp.                                                                         | 18 energy drink*.mp.                                                                         | 18 energy drink*.mp.                                                                         |
| 19 HFCS.mp                                                                                   | 19 HFCS.mp                                                                                   | 19 HFCS.mp.                                                                                  |
| 20 sugar* sweetened<br>beverage*.mp.                                                         | 20 sugar* sweetened<br>beverage*.mp.                                                         | 20 sugar* sweetened<br>beverage*.mp.                                                         |
| 1 or 2 or 3 or 4 or 5 or 6 or<br>7 or 8 or 9 or 10 or 11 or 12<br>or 13 or 14 or 15 or 16 or | 1 or 2 or 3 or 4 or 5 or 6 or<br>7 or 8 or 9 or 10 or 11 or 12<br>or 13 or 14 or 15 or 16 or | 1 or 2 or 3 or 4 or 5 or 6 or<br>7 or 8 or 9 or 10 or 11 or 12<br>or 13 or 14 or 15 or 16 or |
| 21 17 or 18 or 19 or 20                                                                      | 21 17 or 18 or 19 or 20                                                                      | 21 17 or 18 or 19 or 20                                                                      |
| 22 exp interleukins/                                                                         | 22 exp interleukins/                                                                         | 22 exp interleukins/                                                                         |
| 23 interleukin-6.mp.                                                                         | 23 interleukin-6.mp.                                                                         | 23 interleukin-6.mp.                                                                         |
| 24 IL-6.mp.                                                                                  | 24 IL-6.mp.                                                                                  | 24 IL-6.mp.                                                                                  |
| 25 C-reactive protein.mp.                                                                    | 25 C-reactive protein.mp.                                                                    | 25 C-reactive protein.mp.                                                                    |
| 26 CRP.mp                                                                                    | 26 CRP.mp.                                                                                   | 26 CRP.mp.                                                                                   |
| 27 Tumor Necrosis Factor-<br>alpha.mp.                                                       | 27 Tumor Necrosis Factor-<br>alpha.mp.                                                       | 27 Tumor Necrosis Factor-<br>alpha.mp.                                                       |
| 28 tnf-alpha.mp.                                                                             | 28 tnf-alpha.mp.                                                                             | 28 tnf-alpha.mp.                                                                             |
| 22 or 23 or 24 or 25 or 26<br>or 27 or 28                                                    | 22 or 23 or 24 or 25 or 26<br>or 27 or 28                                                    | 22 or 23 or 24 or 25 or 26<br>or 27 or 28                                                    |
| 29 21 and 29                                                                                 | 29 21 and 29                                                                                 | 29 21 and 29                                                                                 |
| 30 21 and 29                                                                                 | 30 21 and 29                                                                                 | 30 21 and 29                                                                                 |
| 31 exp cohort studies/                                                                       | 31 exp cohort analysis/                                                                      |                                                                                              |
| 32 cohort\$.mp.                                                                              | 32 exp longitudinal study/                                                                   |                                                                                              |
| 33 epidemiologic methods/                                                                    | 33 exp prospective study/                                                                    |                                                                                              |

|                                                                                                                                                                                                                                                                                                                                                                                                                          |                                                                                                                                                                                                                                                                                                                                                                                                                                                                                                              |  |
|--------------------------------------------------------------------------------------------------------------------------------------------------------------------------------------------------------------------------------------------------------------------------------------------------------------------------------------------------------------------------------------------------------------------------|--------------------------------------------------------------------------------------------------------------------------------------------------------------------------------------------------------------------------------------------------------------------------------------------------------------------------------------------------------------------------------------------------------------------------------------------------------------------------------------------------------------|--|
| 34 exp case-control studies/<br>35 (case\$ and control\$).mp.<br>36 (case\$ and series).mp.<br>37 case reports.pt.<br>38 (case\$ adj2 report\$).mp.<br>39 (case\$ adj2 stud\$).mp.<br>31 or 32 or 33 or 34 or 35<br>40 or 36 or 37 or 38 or 39<br>41 30 not 40<br>42 Limit 41 to animals<br>43 41 not 42<br>44 random:.tw.<br>45 clinical trial:.mp.<br>46 exp health care quality/<br>47 44 or 45 or 46<br>48 43 and 47 | 34 exp follow up/<br>35 cohort\$.mp.<br>36 exp case control study/<br>37 (case\$ and control\$).mp.<br>38 case report/<br>39 (case\$ adj2 report\$).mp.<br>40 (case\$ adj2 stud\$).mp.<br>41 exp case study/<br>42 (case\$ and series).mp.<br>31 or 32 or 33 or 34 or 35<br>or 36 or 37 or 38 or 39 or<br>43 40 or 41 or 42<br>44 30 not 43<br>45 Limit 44 to animal studies<br>46 44 not 45<br>47 random:.tw.<br>48 clinical trial:.mp.<br>49 exp health care quality/<br>50 47 or 48 or 49<br>51 46 and 50 |  |
|--------------------------------------------------------------------------------------------------------------------------------------------------------------------------------------------------------------------------------------------------------------------------------------------------------------------------------------------------------------------------------------------------------------------------|--------------------------------------------------------------------------------------------------------------------------------------------------------------------------------------------------------------------------------------------------------------------------------------------------------------------------------------------------------------------------------------------------------------------------------------------------------------------------------------------------------------|--|

CRP=C reactive protein; IL-6=Interleukin-6; TNF-alpha= tumour necrosis factor alpha; SSB= sugar sweetened beverages; HFCS= high fructose corn syrup



**Supplemental Table S3: PICOTS framework of the search strategy**

| <b>Participants</b>                            | <b>Interventions</b>                       | <b>Comparators</b>                                                                        | <b>Outcomes</b>                                                             | <b>Time</b>   | <b>Study design</b>              |
|------------------------------------------------|--------------------------------------------|-------------------------------------------------------------------------------------------|-----------------------------------------------------------------------------|---------------|----------------------------------|
| Individuals of all ages and health backgrounds | Food sources of fructose-containing sugars | Diets and foods free or lower (minimum 5g sugar difference) in fructose-containing sugars | CRP, TNF- $\alpha$ , and IL-6, mean difference and 95% confidence intervals | $\geq 7$ days | Controlled trials done in humans |

CRP = C-reactive protein; IL-6 = Interleukin 6; PICOTS=participants, interventions, comparators, outcomes, time and study design; TNF- $\alpha$  = Tumour necrosis factor-alpha

**Supplemental Table S4: Food source definitions**

| <b>Food source of fructose-containing sugars</b> | <b>Definition</b>                                                                                                                                                                                                                                                    |
|--------------------------------------------------|----------------------------------------------------------------------------------------------------------------------------------------------------------------------------------------------------------------------------------------------------------------------|
| SSB                                              | Carbonated or non-carbonated beverages where all or the majority of sugars are added sugars. This also includes interventions where sugars were provided to participants as crystalline packages and where they are instructed to add or incorporate into beverages. |
| Sweetened dairy                                  | Animal dairy products sweetened with added sugars and where the control includes non-dairy products. These would contain both added and naturally occurring sugars.                                                                                                  |
| Sweetened dairy alternatives (soy)               | Soy-based dairy products sweetened with added sugars and where the control includes non-soy-based dairy products.                                                                                                                                                    |
| Sweetened dairy alternative (other)              | Other plant-based dairy products sweetened with added sugars and where the control includes non-plant-based dairy products.                                                                                                                                          |
| Fruit drink                                      | Fruit drinks which are derived from fruit juices or fruit flavouring with added sugars. These must contain added and may also contain naturally occurring sugars.                                                                                                    |
| 100% Fruit juice                                 | Fruit juice which is derived 100% from fruits with no added sugar. The one exception was cranberry juice, in which a small amount of added sugars was added for palatability.                                                                                        |
| Fruit                                            | Includes whole fruit, freeze-dried powdered fruit, smoothies in which the only difference between intervention groups is the fruit present. The dose of the sugars under investigation is naturally occurring coming from fruit.                                     |
| Dried fruit                                      | Includes unsweetened and sweetened dried fruit. Sugars can be naturally occurring, or both naturally occurring and added.                                                                                                                                            |
| Mixed fruit forms                                | Interventions include two or more of the food sources of fruit sugars (i.e., fruit, dried fruit, 100% fruit juice). Sugars are naturally occurring coming from fruit.                                                                                                |
| Sweetened cereal grains and bars                 | Includes sweetened dried cereal, nut bars and fruit and nut bars. Sugars are added.                                                                                                                                                                                  |
| Sweets and desserts                              | Includes cookies, cakes, muffins, confectionaries, fondant, etc. Sugars are added.                                                                                                                                                                                   |
| Honey                                            | Honey was provided to participants.                                                                                                                                                                                                                                  |
| Added nutritive (caloric) sweetener              | Sugars provided to participants as crystalline packages, where they are instructed to add or incorporate it to various foods. Sugars are added regulatory designations.                                                                                              |
| Mixed sources (with SSBs)                        | Interventions where fructose-containing sugars were consumed in the form of SSBs in addition to other food sources. Examples include whole dietary interventions. Sugars can be added, or both naturally occurring and added.                                        |
| Mixed sources (without SSBs)                     | Interventions include two or more of the above food sources of fructose-containing sugars with the exception of SSBs. Sugars can be added, or both naturally occurring and added.                                                                                    |

SSB; Sugar sweetened beverages

**Supplemental Table S5: Trial characteristics**

| Study, Year                | Participant<br>s (M, W)           | Age<br>Mean<br>(SD<br>or<br>range)<br>(years) | Setting         | BW<br>Mean<br>(SD or<br>range)<br>(kg) | BMI<br>Mean<br>(SD or<br>range)<br>(kg/m <sup>2</sup> ) | CRP<br>Mean<br>(SD or<br>range)<br>(mg/L) | IL-6<br>Mean<br>(SD)<br>(pg/mL) | TNF-<br>α<br>Mean<br>(SD)<br>(pg/mL) | Design | Feeding<br>Control <sup>a</sup> | Randomization | Sugars<br>and<br>Control<br>Source | Intervention or<br>Comparator | Fructose-<br>containing<br>sugars<br>dose<br>(g/d)(%<br>E) <sup>b</sup> | Diet<br>(%<br>C:F:P) <sup>c</sup> | Energy<br>Balance <sup>d</sup> | Follow-<br>up | Funding<br>Sources <sup>e</sup> | Inflammation<br>Medication<br>use |
|----------------------------|-----------------------------------|-----------------------------------------------|-----------------|----------------------------------------|---------------------------------------------------------|-------------------------------------------|---------------------------------|--------------------------------------|--------|---------------------------------|---------------|------------------------------------|-------------------------------|-------------------------------------------------------------------------|-----------------------------------|--------------------------------|---------------|---------------------------------|-----------------------------------|
| <b>Substitution Trials</b> |                                   |                                               |                 |                                        |                                                         |                                           |                                 |                                      |        |                                 |               |                                    |                               |                                                                         |                                   |                                |               |                                 |                                   |
| <b>Food Source:</b>        |                                   |                                               |                 |                                        |                                                         |                                           |                                 |                                      |        |                                 |               |                                    |                               |                                                                         |                                   |                                |               |                                 |                                   |
| <b>SSB</b>                 |                                   |                                               |                 |                                        |                                                         |                                           |                                 |                                      |        |                                 |               |                                    |                               |                                                                         |                                   |                                |               |                                 |                                   |
| <b>Aeberli et al. 2011</b> | 29 H<br>(29M, 0W)                 | 26<br>(7)                                     | OP, Switzerland | 73.7<br>(8.8)                          | 22.4<br>(1.9)                                           | 0.2<br>(0.4)                              | NR                              | NR                                   | C      | Supp                            | Y             |                                    |                               |                                                                         |                                   | Neutral                        | 3 wk          | A, I                            | N                                 |
| Intervention               | 29 H<br>(29M, 0W)                 |                                               |                 |                                        |                                                         |                                           |                                 |                                      |        |                                 |               | Fructose                           | 600mL/d SSB                   | ~80<br>(13)                                                             | 55:32:13                          |                                |               |                                 |                                   |
| Intervention               | 29 H<br>(29M, 0W)                 |                                               |                 |                                        |                                                         |                                           |                                 |                                      |        |                                 |               | Sucrose                            | 600mL/d SSB                   | ~80<br>(12)                                                             | 55:32:13                          |                                |               |                                 |                                   |
| Intervention               | 29 H<br>(29M, 0W)                 |                                               |                 |                                        |                                                         |                                           |                                 |                                      |        |                                 |               | Fructose                           | 600mL/d SSB                   | ~40 (7)                                                                 | 51:35:14                          |                                |               |                                 |                                   |
| Control                    | 29 H<br>(29M, 0W)                 |                                               |                 |                                        |                                                         |                                           |                                 |                                      |        |                                 |               | Glucose                            | 600mL/d SSB                   |                                                                         |                                   |                                |               |                                 |                                   |
| <b>Chiu et al. 2020</b>    | 30<br>OW/OB children<br>(30B, 0G) | 15<br>(2)                                     | OP, USA         | 86.8<br>(15.7)                         | 1.8<br>(0.5)                                            | NR                                        | NR                              | NR                                   | C      | Supp                            | Y             |                                    |                               |                                                                         | 49:36:16                          | Neutral                        | 3 wk          | A, I                            | N                                 |
| Intervention               |                                   |                                               |                 |                                        |                                                         |                                           |                                 |                                      |        |                                 |               | HFCS                               | HFCS-sweetened beverage       | ~110<br>(22)                                                            |                                   |                                |               |                                 |                                   |
| Control                    |                                   |                                               |                 |                                        |                                                         |                                           |                                 |                                      |        |                                 |               | Milk                               | 2% milk                       |                                                                         |                                   |                                |               |                                 |                                   |
| <b>Cox et al. 2012</b>     | 30 H                              | 54                                            | IP/OP, USA      | 85.9 <sup>f</sup>                      | 29.3 <sup>f</sup>                                       |                                           |                                 | NR                                   | P      | Met, Supp                       | N             |                                    |                               |                                                                         | 55:30:15                          | Neutral                        | 10 wk         | A                               | N                                 |
| Intervention               | 16 H                              | 53                                            |                 |                                        |                                                         | 3.7<br>(3.2)                              | 3.5<br>(2.8)                    |                                      |        |                                 |               | Fructose                           | Fructose-sweetened beverage   | ~125<br>(25)                                                            |                                   |                                |               |                                 |                                   |
| Control                    | 14 H                              | 55                                            |                 |                                        |                                                         | 5.7<br>(9.3)                              | 3.3<br>(2.7)                    |                                      |        |                                 |               | Glucose                            | Glucose-sweetened beverage    |                                                                         |                                   |                                |               |                                 |                                   |
| <b>Jin et al. 2014</b>     | 21 OW<br>(11M, 10W)               | 14(3)                                         | OP, USA         |                                        | NR                                                      |                                           | NR                              | NR                                   | P      | Supp                            | Y             |                                    |                               |                                                                         | NR                                | Neutral                        | 4 wk          | A                               | N                                 |

|                                 |                             |            |            |                |               |              |               |              |   |                                                        |   |          |                                    |               |          |                                 |          |   |    |
|---------------------------------|-----------------------------|------------|------------|----------------|---------------|--------------|---------------|--------------|---|--------------------------------------------------------|---|----------|------------------------------------|---------------|----------|---------------------------------|----------|---|----|
| Intervention                    | 9 OW<br>(3M, 6W)            | 14(3<br>)  |            | 82.3(16<br>.9) | 6.8(9.5<br>)  |              |               |              |   |                                                        |   | Fructose | Fructose-<br>sweetened<br>beverage | ~99<br>(20)   |          |                                 |          |   |    |
| Control                         | 12 OW<br>(8M, 4W)           | 13(3<br>)  |            | 82(14.8<br>)   | 5.21(4.<br>6) |              |               |              |   |                                                        |   | Glucose  | Glucose-<br>sweetened<br>beverage  |               |          |                                 |          |   |    |
| <b>Johnston et al. 2013</b>     | 32<br>OW/OB<br>(32M,<br>0W) |            | OP, UK     | 95.3<br>(5.7)  |               |              |               |              | P | Positi<br>ve<br>EB:<br>Supp;<br>Neutr<br>al EB:<br>Met | Y |          |                                    |               | 55:30:15 | Neutra<br>l and<br>positiv<br>e | 2 wk     | A | NR |
| Intervention                    | 15<br>OW/OB<br>(15M,<br>0W) | 34<br>(10) |            | 96.8<br>(7.4)  | 30<br>(1.4)   | 1.0<br>(1.1) | 3.6<br>(4.8)  | 1.9<br>(0.5) |   |                                                        |   | Fructose | Fructose-<br>sweetened<br>beverage | ~221<br>(25)  |          |                                 |          |   |    |
| Intervention                    | 15<br>OW/OB<br>(15M,<br>0W) | 35<br>(11) |            | 96.8<br>(7.4)  | 30<br>(1.4)   | 1.0<br>(1.1) | 3.6<br>(4.8)  | 1.9<br>(0.5) |   |                                                        |   | Fructose | Fructose-<br>sweetened<br>beverage | ~221<br>(25)  |          |                                 |          |   |    |
| Control                         | 17<br>OW/OB<br>(17M,<br>0W) | 33<br>(9)  |            | 93.9<br>(8.7)  | 28.9<br>(1.7) | 1.4<br>(1.5) | 5.0<br>(13.9) | 2.0<br>(0.3) |   |                                                        |   | Glucose  | Glucose-<br>sweetened<br>beverage  |               |          |                                 |          |   |    |
| <b>Kuzma et al. 2016</b>        | 24 H<br>(15M,<br>9W)        | 36<br>(12) | OP,<br>USA | NR             | 27.4<br>(4.8) | 1.8<br>(1.5) | NR            | NR           | C | Supp                                                   | Y |          |                                    |               |          | Positiv<br>e                    | 1 wk     | A | NR |
| Intervention                    |                             |            |            |                |               |              |               |              |   |                                                        |   | Fructose | Fructose-<br>sweetened<br>beverage | ~125<br>(25)  | 43:12:13 |                                 |          |   |    |
| Intervention                    |                             |            |            |                |               |              |               |              |   |                                                        |   | HFCS     | HFCS-<br>sweetened<br>beverage     | ~125<br>(25)  | 43:12:13 |                                 |          |   |    |
| Control                         |                             |            |            |                |               |              |               |              |   |                                                        |   | Glucose  | Glucose-<br>sweetened<br>beverage  |               | 42:24:14 |                                 |          |   |    |
| <b>Sweetened Dairy</b>          |                             |            |            |                |               |              |               |              |   |                                                        |   |          |                                    |               |          |                                 |          |   |    |
| <b>Angelopoulos et al. 2016</b> | 267 H                       | 38(1<br>2) | OP,<br>USA | 73.6<br>(12.4) | 26.3<br>(3.3) | 1.6<br>(1.8) | NR            | NR           | P | Supp                                                   | Y |          |                                    |               | NR       | Neutra<br>l                     | 10<br>wk | I | N  |
| Intervention                    | 61 H                        | 36(1<br>)  |            |                |               |              |               |              |   |                                                        |   | HFCS     | 18% HFCS in<br>milk                | ~86.8<br>(18) |          |                                 |          |   |    |
| Intervention                    | 64 H                        | 40(1<br>3) |            |                |               |              |               |              |   |                                                        |   | Sucrose  | 18% Sucrose<br>in milk             | ~93.1<br>(18) |          |                                 |          |   |    |
| Intervention                    | 65 H                        | 39(1<br>2) |            |                |               |              |               |              |   |                                                        |   | Fructose | 9% Fructose in<br>milk             | ~46.5<br>(9)  |          |                                 |          |   |    |

|                                           |                     |        |            |            |            |           |           |           |      |      |   |              |                              |             |           |          |       |      |    |
|-------------------------------------------|---------------------|--------|------------|------------|------------|-----------|-----------|-----------|------|------|---|--------------|------------------------------|-------------|-----------|----------|-------|------|----|
| Control                                   | 77 H                | 36(2)  |            |            |            |           |           |           |      |      |   | Glucose      | 9% Glucose in milk           |             |           |          |       |      |    |
| <b>Sweetened Dairy Alternatives (Soy)</b> |                     |        |            |            |            |           |           |           |      |      |   |              |                              |             |           |          |       |      |    |
| <b>Eslami et al. 2019</b>                 | 64 OW/OB (19M, 45W) | 46(10) | OP, Iran   |            |            | NR        | NR        | P         | Supp | Y    |   |              |                              |             | 55:30:15  | Negative | 8 wk  | A, I | N  |
| Intervention                              | 32 OW/OB (10M, 22W) | 46(1)  |            | 83.8 (9.8) | 30.9(3.6)  | 3.7 (1.8) |           |           |      |      |   | Sucrose      | Sweetened soy beverage       | ~5(1)       |           |          |       |      |    |
| Control                                   | 32 OW/OB (9M, 23W)  | 45(10) |            | 84.5(14)   | 31.4(3.7)  | 3.5 (1.4) |           |           |      |      |   | Mixed Diet   | Grains/starches/fats         |             |           |          |       |      |    |
| <b>100% Fruit Juice</b>                   |                     |        |            |            |            |           |           |           |      |      |   |              |                              |             |           |          |       |      |    |
| <b>Ponce et al. 2019</b>                  | 72 MetS (23M, 49W)  | 48(9)  | OP, Brazil | 95(16)     | 34.6 (4.1) | 8.1(0.6)  | NR        | NR        | P    | Supp | Y |              |                              |             |           | Neutral  | 12 wk | A    | NR |
| Intervention                              | 36 MetS (12M, 24W)  | 49(9)  |            | 96(16)     | 34 (4.2)   |           |           |           |      |      |   | Fruit        | 500 mL orange juice/d        | ~44 (~12.2) | 49:27:24  |          |       |      |    |
| Control                                   | 36 MetS (11M, 25W)  | 46(9)  |            | 95(15)     | 35.1 (4.1) |           |           |           |      |      |   | Fat          | Energy equivalent nuts       |             | 48:28:24  |          |       |      |    |
| <b>Ribeiro et al 2017</b>                 | 78 OB (24M, 54W)    | 36(1)  | OP, Brazil | 97.5(12)   | 33(3)      |           | NR        | NR        | P    | Supp | Y |              |                              |             | ~60:35:15 | Negative | 12 wk | A, I | N  |
| Intervention                              | 39 OB               | 37(1)  |            | 97(12)     | 33(3)      | 0.5 (0.6) |           |           |      |      |   | Fruit juice  | 500 mL orange juice/d        | ~44 (~8.8)  |           |          |       |      |    |
| Control                                   | 39 OB               | 33(1)  |            | 98(12)     | 35(4)      | 0.5 (0.6) |           |           |      |      |   | Mixed Diet   | Energy equivalent food item  |             |           |          |       |      |    |
| <b>Fruit</b>                              |                     |        |            |            |            |           |           |           |      |      |   |              |                              |             |           |          |       |      |    |
| <b>Du et al. 2019</b>                     | 49 OA (14M, 35W)    |        | OP, USA    | NR         | 32.2 (6.2) | NR        |           |           | P    | Supp | Y |              |                              |             | NR        | Positive | 16 wk | I    | N  |
| Intervention                              | 27 OA (9M, 18W)     | 56(10) |            |            |            |           | 1.5 (0.5) | 2.2 (0.3) |      |      |   | Fruit        | Freeze dried whole blueberry | ~3.4 (0.7)  |           |          |       |      |    |
| Control                                   | 22 OA (5M, 17W)     | 55(8)  |            |            |            |           | 1.3 (0.5) | 2.0 (0.3) |      |      |   | Maltodextrin | Placebo powder               |             |           |          |       |      |    |
| <b>Fridell et al. 2018</b>                | 30H (18M, 12W)      | 24 (4) | OP, Sweden |            | 22.3 (1.9) |           |           |           | P    | DA   | Y |              |                              |             | NR        | Positive | 8 wk  | A    | N  |



|                                     |                          |           |                |                |                |              |              |               |   |      |   |                |                                                          |                |          |  |          |              |          |      |   |
|-------------------------------------|--------------------------|-----------|----------------|----------------|----------------|--------------|--------------|---------------|---|------|---|----------------|----------------------------------------------------------|----------------|----------|--|----------|--------------|----------|------|---|
| Kanellos et al. 2014                | 48 T2D<br>(25M, 23W)     |           | OP,<br>Greece  |                |                |              | NR           | NR            | P | Supp | Y |                |                                                          |                |          |  | NR       | Neutra<br>l  | 24<br>wk | A, I | N |
|                                     | 26 T2D<br>(15M, 11W)     | 64(6<br>) |                | 83.4<br>(13.8) | 30.5<br>(4.4)  | 2.2<br>(0.9) |              |               |   |      |   | Fruit          | 36g/d of<br>Corinthian<br>raisins<br>replacing<br>snacks | ~24<br>(4.9)   |          |  |          |              |          |      |   |
|                                     | 22 T2D<br>(10M, 12W)     | 63(9<br>) |                | 81.2<br>(14.3) | 30.4<br>(5.5)  | 3.1<br>(1.5) |              |               |   |      |   | Mixed<br>Diet  | Usual diet, no<br>grapes/raisins                         |                |          |  |          |              |          |      |   |
| Kaliora et al. 2016                 | 44<br>NAFLD              | NR        | OP,<br>Greece  |                |                |              |              |               | P | Supp | Y |                |                                                          |                |          |  | 50:30:20 | Negati<br>ve | 24<br>wk | A, I | N |
|                                     | 23<br>NAFLD              |           |                | 85.7<br>(14.3) | 29.7<br>(22.2) | 2.1<br>(1.9) | 1.6<br>(1.4) | 0.9<br>(1.1)  |   |      |   | Fruit          | 36g/d of<br>Corinthian<br>raisins<br>replacing<br>snacks | ~24<br>(~4.98) |          |  |          |              |          |      |   |
|                                     | 21<br>NAFLD              |           |                | 82 (3)         | 29.1<br>(21.8) | 2.4<br>(3.1) | 1.7<br>(3.2) | 1.3<br>(1)    |   |      |   | Mixed<br>Diet  | Usual diet, no<br>grapes/raisins                         |                |          |  |          |              |          |      |   |
| Lehtonen et al. 2011                | 80<br>OW/OB<br>(0M, 80W) | 44(6<br>) | OP,<br>Finland | 81.6<br>(8.5)  | 29.6<br>(2.1)  | NR           | NR           | NR            | C | Supp | Y |                |                                                          |                |          |  | NR       | Neutra<br>l  | 5 wk     | A,I  | Y |
|                                     |                          |           |                |                |                |              |              |               |   |      |   | Dried<br>Fruit | Sea Buckthorn<br>berry                                   | ~8.4<br>(1.7)  |          |  |          |              |          |      |   |
|                                     |                          |           |                |                |                |              |              |               |   |      |   | Mixed<br>Diet  | Diet alone                                               |                |          |  |          |              |          |      |   |
| Puglisi et al. 2008                 | 22 H<br>(11 M, 11<br>W)  | 56<br>(5) | OP,<br>USA     | 78.6<br>(16.0) | 27.7<br>(3.8)  | NR           | NR           | 4.39<br>(2.6) | P | Supp | Y |                |                                                          |                |          |  |          | Positiv<br>e | 6 wk     | I    | N |
|                                     | 10 H<br>(5 M, 5<br>W)    | 58<br>(5) |                | 78.4<br>(15.9) | 27.5<br>(3.8)  |              |              |               |   |      |   | Dried<br>fruit | Walking + 1<br>cup raisins/d                             | ~86<br>(17.2)  | 56:29:15 |  |          |              |          |      |   |
|                                     | 12 H<br>(6 M, 6<br>W)    | 55<br>(4) |                | 78.7<br>(16.8) | 27.9<br>(3.9)  |              |              |               |   |      |   | Diet<br>alone  | Walking                                                  |                |          |  |          |              |          |      |   |
| Mixed Fruit Forms                   |                          |           |                |                |                |              |              |               |   |      |   |                |                                                          |                |          |  |          |              |          |      |   |
| Lehtonen et al. 2010                |                          | 43(6<br>) | OP,<br>Finland | 81.6(8.<br>5)  |                |              |              | 1 (1)         | P | Supp | Y |                |                                                          |                |          |  |          | Neutra<br>l  | 20<br>wk | A,I  | N |
|                                     | 28OW(0M<br>, 28W)        |           |                |                | 29.3(2.<br>2)  | 2.2<br>(2.1) | 1.0<br>(1.1) | 1.0<br>(1.1)  |   |      |   | Fruit          | Fresh berries                                            | ~14.7(3<br>.3) | 50:32:17 |  |          |              |          |      |   |
|                                     | 22OW(<br>0M, 22W)        |           |                |                | 29.5(1.<br>8)  | 2.3(2.1<br>) | 1.0<br>(1.1) | 1.0<br>(1.0)  |   |      |   | Mixed<br>Diet  | Mixed snacks                                             |                |          |  |          |              |          |      |   |
| Added Nutritive (caloric) Sweetener |                          |           |                |                |                |              |              |               |   |      |   |                |                                                          |                |          |  |          |              |          |      |   |

|                                  |                      |           |            |                |               |              |    |              |   |      |   |                      |                                                                        |               |          |                     |      |   |   |
|----------------------------------|----------------------|-----------|------------|----------------|---------------|--------------|----|--------------|---|------|---|----------------------|------------------------------------------------------------------------|---------------|----------|---------------------|------|---|---|
| <b>Sadeghi et al. 2020</b>       | 42 T2D<br>(18M, 24W) | 58(10)    | OP, Iran   | 72<br>(11.9)   | 27.8<br>(3.6) |              | NR | NR           | C | Supp | Y |                      |                                                                        |               |          | Neutra <sub>1</sub> | 8 wk | A | N |
| Intervention                     |                      |           |            |                | 0.7<br>(0.1)  |              |    |              |   |      |   | Honey                | 50g/d honey                                                            | 41(8)         | 66:23:11 |                     |      |   |   |
| Control                          |                      |           |            |                | 0.6<br>(0.2)  |              |    |              |   |      |   | Mixed diet alone     | No honey                                                               |               |          |                     |      |   |   |
| <b>Mixed sources (with SSBs)</b> |                      |           |            |                |               |              |    |              |   |      |   |                      |                                                                        |               |          |                     |      |   |   |
| <b>Brymora et al. 2012</b>       | 28 CKD<br>(17M, 11W) | 59(15)    | OP, Poland | 85.8<br>(11.5) | 29.9<br>(4.2) |              | NR |              | C | DA   | N |                      |                                                                        |               | 55:30:15 | Neutra <sub>1</sub> |      | A | N |
| Intervention                     |                      |           |            |                | 3.3<br>(4.5)  |              |    | 2.4<br>(1.7) |   |      |   | Fructose, sucrose    | Regular basal diet. Including SSBs                                     | ~59<br>(10.2) |          |                     | 2 wk |   |   |
| Intervention                     |                      |           |            |                | 3.3<br>(4.5)  |              |    | 2.4<br>(1.7) |   |      |   | Fructose, sucrose    | Regular basal diet resumed. Including SSBs                             | ~53<br>(9.1)  |          |                     | 6 wk |   |   |
| Control                          |                      |           |            |                | 4.3<br>(4.9)  |              |    | 2.7<br>(2.5) |   |      |   | Starch               | Low-fructose diet - restrict SSB, NSB and fruits                       |               |          |                     | 6 wk |   |   |
| <b>Jalilvand et al. 2020</b>     | 40 T2D<br>(16M, 24W) |           | OP, Iran   |                |               |              | NR | NR           | P | DA   | Y |                      |                                                                        |               | 55:30:15 | Neutra <sub>1</sub> | 8 wk | A | N |
| Intervention                     | 20 T2D<br>(8M, 12W)  | 53<br>(7) |            | 63.3<br>(6)    | 24.2<br>(1.6) | 2.8<br>(1.7) |    |              |   |      |   | Mixed fructose types | Conventional diabetic diet from ADA 2017 guideline                     | 25 (5)        |          |                     |      |   |   |
| Control                          | 20 T2D<br>(8M, 12W)  | 53<br>(8) |            | 63.6<br>(5.4)  | 24.6<br>(1.4) | 2.7<br>(1.5) |    |              |   |      |   | Mixed comparator     | Restrict sucrose-sweetened and artificially sweetened drinks and foods | 8.7<br>(1.8)  |          |                     |      |   |   |



|                              |              |                           |               |            |  |                |               |               |              |              |    |   |  |         |                                                                                                                                                                      |             |          |  |             |          |    |   |
|------------------------------|--------------|---------------------------|---------------|------------|--|----------------|---------------|---------------|--------------|--------------|----|---|--|---------|----------------------------------------------------------------------------------------------------------------------------------------------------------------------|-------------|----------|--|-------------|----------|----|---|
| Khodami et al. 2022          |              | 43<br>NAFLD<br>(32M, 11W) |               | OP, Iran   |  |                |               | NR            |              | P            | DA | Y |  |         | Both groups received advice on a balanced diet (emphasizing lean meats, low-fat dairy, whole grains, legumes, fruits, and vegetables) and moderate physical activity |             | NR       |  | Neutra<br>l | 12<br>wk | A  | N |
|                              | Intervention | 21<br>NAFLD<br>(17 M, 4W) | 46<br>(11)    |            |  | 96.5<br>(18.5) | 32.3<br>(4.3) | 3.8<br>(0.8)  | 4.9<br>(2.1) |              |    |   |  | Mixed   | Usual diet                                                                                                                                                           |             | 58:33:14 |  |             |          |    |   |
|                              | Control      | 22<br>NAFLD<br>(15M, 7W)  | 41<br>(11)    |            |  | 91.7<br>(14.7) | 31.4<br>(3.8) | 3.8<br>(1.1)  | 4.6<br>(1.5) |              |    |   |  | Mixed   | Low sugar diet (<10%E from free sugars)                                                                                                                              |             | 63:33:13 |  |             |          |    |   |
| Nilholm et al. 2021          |              | 105 IBS<br>(23M, 82W)     |               | OP, Sweden |  |                | NR            |               |              | P            | DA | Y |  |         |                                                                                                                                                                      |             |          |  | Neutra<br>l | 4wk      | A  | N |
|                              | Intervention | 25 IBS<br>(3 M, 22 W)     | 35<br>(29-50) |            |  | 68 (57-75)     |               | 1.5<br>(2.6)  | 0.7<br>(0.4) | 2.9<br>(3.3) |    |   |  | Sucrose | Regular diet                                                                                                                                                         | 20<br>(6.3) | 42:38:17 |  |             |          |    |   |
|                              | Control      | 80 IBS<br>(20 M, 60 W)    | 48<br>(37-57) |            |  | 72 (64-85)     |               | 2.4<br>(4)    | 0.9<br>(1.5) | 4.1<br>(14)  |    |   |  | Mixed   | Starch or sucrose reduced diet (kept energy the same)                                                                                                                |             | 25:47:21 |  |             |          |    |   |
| Souto et al. 2013            |              | 33 DM1<br>(21 M, 12 W)    | 22<br>(5)     | OP, Brazil |  | NR             |               | NR            | NR           | P            | DA | N |  |         |                                                                                                                                                                      |             |          |  | Neutra<br>l | 12<br>wk | NR | N |
|                              | Intervention | 15 DM1<br>(8 M, 7 W)      |               |            |  |                | 24.0<br>(2.6) | 0.38<br>(0.2) |              |              |    |   |  | Sucrose | encouraged to select Sucrose containing foods from an exchange list                                                                                                  | 162 (7)     | 58:26:20 |  |             |          |    |   |
|                              | Control      | 18 DM1<br>(12 M, 6 W)     |               |            |  |                | 22.4<br>(2.7) | 0.27<br>(0.2) |              |              |    |   |  | Starch  | Isocaloric exchange of sucrose for sucrose-free foods based on an exchange list                                                                                      |             | 53:24:20 |  |             |          |    |   |
| Mixed sources (without SSBs) |              |                           |               |            |  |                |               |               |              |              |    |   |  |         |                                                                                                                                                                      |             |          |  |             |          |    |   |

|                              |                              |            |                        |                |               |              |              |              |   |             |   |         |                                                                                                                                     |               |               |              |      |   |   |
|------------------------------|------------------------------|------------|------------------------|----------------|---------------|--------------|--------------|--------------|---|-------------|---|---------|-------------------------------------------------------------------------------------------------------------------------------------|---------------|---------------|--------------|------|---|---|
| <b>Goss et al. 2020</b>      | 34<br>OW/OB<br>(12M,<br>22W) |            | OP,<br>USA             |                |               |              |              |              | P | Supp,<br>DA | Y |         |                                                                                                                                     |               |               | Negati<br>ve | 8wk  | A | N |
| Intervention                 | 15<br>OW/OB<br>(5M, 10<br>W) | 70<br>(3)  |                        | 96.8<br>(30.9) | 34.7<br>(3.8) | 3.7<br>(3.7) | 1.6<br>(0.9) | 1.8<br>(0.9) |   |             |   | Mixed   | Low-fat diet,<br>breakfast bars                                                                                                     | 78<br>(20.3)  | 55:20:25      |              |      |   |   |
| Control                      | 19<br>OW/OB<br>(7M,<br>12W)  | 70<br>(4)  |                        | 93.7<br>(15.1) | 34.0<br>(3.4) | 3.2<br>(2.3) | 2.2<br>(1.1) | 1.5<br>(1)   |   |             |   | Fat     | Eggs, high-fat<br>diet                                                                                                              |               |               |              |      |   |   |
| <b>Maki et al. 2020</b>      | 30 MetS<br>(11M,<br>19W)     | 54<br>(10) | OP,<br>USA             | 89.6<br>(13.1) | 31.9<br>(3.8) | 2.1<br>(2.4) | NR           | NR           | C | Supp        | Y |         |                                                                                                                                     |               |               | Neutra<br>l  | 4 wk | I | N |
| Intervention                 |                              |            |                        |                |               |              |              |              |   |             |   | Mixed   | Breakfasts<br>included<br>ready-to-eat<br>cereals with<br>milk, waffles<br>with syrup,<br>granola<br>bar, fresh and<br>dried fruits | 25<br>(4.7)   | ~60:31:1<br>2 |              |      |   |   |
| Control                      |                              |            |                        |                |               |              |              |              |   |             |   | Protein | Rotation of 3<br>egg-based<br>breakfasts<br>each providing<br>2 eggs/d, 6<br>d/wk                                                   |               | ~41:32:2<br>6 |              |      |   |   |
| <b>Palacios et al. 2020</b>  | 66 pre-DM<br>(17M,<br>16W)   | 48<br>(13) | OP,<br>USA             | 89 (17)        | 31 (4)        |              |              | NR           | C | Supp        | Y |         |                                                                                                                                     |               |               | Neutra<br>l  | 6 wk | I | N |
| Intervention                 |                              |            |                        |                |               | 2.1<br>(0.4) | 1.9<br>(0.4) |              |   |             |   | Mixed   | 20%E from<br>free sugars<br>provided as<br>candy and<br>SSB                                                                         | 36<br>(6.4)   | 62:19:15      |              |      |   |   |
| Control                      |                              |            |                        |                |               | 2.2<br>(0.4) | 1.9<br>(0.4) |              |   |             |   | Fat     | 20% E from<br>saturated fat                                                                                                         |               | 35:46:14      |              |      |   |   |
| <b>Van Meijl et al. 2010</b> | 35 H<br>(10M,<br>25W)        | 50<br>(13) | OP,<br>Netherla<br>nds | NR             | 32.0<br>(3.8) | NR           | NR           | NR           | C | Supp        | Y |         |                                                                                                                                     |               |               | Positiv<br>e | 8 wk | I | N |
| Intervention                 |                              |            |                        |                |               |              |              |              |   |             |   | Sucrose | 43 g fruit<br>biscuits/d                                                                                                            | ~70.2<br>(45) | 53:30:16      |              |      |   |   |
| Control                      |                              |            |                        |                |               |              |              |              |   |             |   | Dairy   | Yogurt                                                                                                                              |               | 46:33:19      |              |      |   |   |

| Addition Trials             |                      |         |                 |              |            |                |             |            |   |      |   |          |                                          |           |           |          |      |      |    |
|-----------------------------|----------------------|---------|-----------------|--------------|------------|----------------|-------------|------------|---|------|---|----------|------------------------------------------|-----------|-----------|----------|------|------|----|
| Food Source:                |                      |         |                 |              |            |                |             |            |   |      |   |          |                                          |           |           |          |      |      |    |
| SSB                         |                      |         |                 |              |            |                |             |            |   |      |   |          |                                          |           |           |          |      |      |    |
| Aeberli et al. 2011         | 29 H (29M, 0W)       | 26 (7)  | OP, Switzerland | 73.7 (8.8)   | 22.4 (1.9) | 0.2 (0.4)      | NR          | NR         | C | Supp | Y |          |                                          |           |           | Positive | 3wk  | A, I | N  |
| Intervention                | 29 H (29M, 0W)       |         |                 |              |            |                |             |            |   |      |   | Fructose | 600mL/d SSB                              | ~80 (13)  | 55:32:13  |          |      |      |    |
| Intervention                | 29 H (29M, 0W)       |         |                 |              |            |                |             |            |   |      |   | Sucrose  | 600mL/d SSB                              | ~80 (12)  | 55:32:13  |          |      |      |    |
| Intervention                | 29 H (29M, 0W)       |         |                 |              |            |                |             |            |   |      |   | Fructose | 600mL/d SSB                              | ~40 (7)   | 51:35:14  |          |      |      |    |
| Control                     | 29 H (29M, 0W)       |         |                 |              |            |                |             |            |   |      |   | Mixed    | Reduce free fructose intake              |           | 46:38:16  |          |      |      |    |
| Johnston et al. 2013        | 32 OW/OB (32M, 0W)   | 34 (10) | OP, UK          |              |            |                |             |            | P |      | N |          |                                          |           | 55:15:30  | Positive | 2 wk | A    | NR |
| Intervention                | 15 OW/OB (15M, 0W)   | 35 (11) |                 | 96.8 (7.4)   | 30 (1.4)   | 1.0 (1.1)      | 3.6 (4.8)   | 1.9 (0.5)  |   | Supp |   | Fructose | Hypercaloric fructose-sweetened beverage | ~125 (25) |           |          |      |      |    |
| Control                     | 17 OW/OB (17M, 0W)   | 33 (9)  |                 | 93.9 (8.7)   | 28.9 (1.7) | 1.4 (1.5)      | 5.0 (13.9)  | 2.0 (0.3)  |   | Met  |   | Glucose  | Isocaloric glucose-sweetened beverage    |           |           |          |      |      |    |
| Njike et al. 2011           | 39 OW/OB (6 M, 33 W) |         | OP, USA         |              |            | 1.0 (0.1-12.7) | NR          | NR         | C | Supp | Y |          |                                          |           |           | Positive | 6 wk | A,I  | N  |
| Intervention                | 39 OW/OB (6 M, 33 W) | 52 (11) |                 | 179.5 (23.2) | 30.3 (3.4) |                |             |            |   |      |   | Sucrose  | Sugar-sweetened hot cocoa beverage       | ~91(18.2) | ~55:29:15 |          |      |      |    |
| Control                     | 38 OW/OB (6 M, 32 W) | 53 (10) |                 | 178.9 (23.9) | 30.2 (3.4) |                |             |            |   |      |   | NNS      | Sugar free hot cocoa beverage            |           | ~48:35:17 |          |      |      |    |
| Sanchez-Delgado et al. 2021 | 38H (11M, 27W)       |         | OP, Mexico      |              |            | NR             |             |            | P | Supp | Y |          |                                          |           |           | Positive | 6 wk | NR   | NR |
| Intervention                | 12 H (3M, 9W)        | 22(4)   |                 | 59.4 (9.1)   | 22.5 (2.4) |                | 37.6 (29.9) | 50.4 (3.8) |   |      |   | Sucrose  | Sucrose 8x5g/day                         | 40 (9)    | 49:31:18  |          |      |      |    |

|                                 |                         |            |              |                |               |                |                |               |   |      |   |               |                                                                                             |               |          |              |          |      |    |
|---------------------------------|-------------------------|------------|--------------|----------------|---------------|----------------|----------------|---------------|---|------|---|---------------|---------------------------------------------------------------------------------------------|---------------|----------|--------------|----------|------|----|
| Control                         | 13 H<br>(3M, 10W)       | 22(4)      |              | 57.4<br>(8.1)  | 22.2<br>(1.8) |                | 32.5<br>(8.3)  | 50.4<br>(2.9) |   |      |   | NNS           | Sucralose<br>4x1g/day                                                                       |               | 45:35:20 |              |          |      |    |
| Control                         | 13 H<br>(5M, 8W)        | 24(5)      |              | 59.1<br>(6.6)  | 21.8<br>(1.9) |                | 30.7<br>(17.3) | 49.4<br>(5)   |   |      |   | NNS           | Steviol<br>glycosides<br>4x1g/day                                                           |               | 45:33:22 |              |          |      |    |
| <b>Vaz et al.<br/>2011</b>      | 192 H                   |            | OP,<br>India |                | NR            | 0.3<br>(0-0.8) | NR             | NR            | P | Supp | Y |               |                                                                                             |               |          | Positiv<br>e | 17<br>wk | I    | NR |
| Intervention                    | 95 H                    | 8<br>(1.0) |              | 21.9<br>(3.4)  |               |                |                |               |   |      |   | Sucrose       | Fortified<br>choco-malt<br>beverage                                                         | ~28<br>(5.6)  | 58:17:9  |              |          |      |    |
| Intervention                    | 95 H                    | 8<br>(1.0) |              | 21.2<br>(3)    |               |                |                |               |   |      |   | Sucrose       | Unfortified<br>choco-malt<br>beverage                                                       | ~28<br>(5.6)  | 67:22:11 |              |          |      |    |
| Control                         | 97 H                    | 8<br>(1.0) |              | 21.5<br>(3)    |               |                |                |               |   |      |   | Diet<br>alone | No beverage                                                                                 |               | 66:23:11 |              |          |      |    |
| <b>Zafrilla et<br/>al. 2021</b> | 136 OW<br>(80M,<br>56W) |            | OP,<br>Spain |                |               | NR             |                | NR            | P | Supp | Y |               | Each group<br>received citris<br>juices and<br>maqui extract<br>but with diff<br>sweeteners |               | NR       | Positiv<br>e | 9 wk     | A    | N  |
| Intervention                    | 45 OW<br>(26M,<br>19W)  | 42<br>(7)  |              | 84.8<br>(12.4) | 29.1<br>(3)   |                | 0.8<br>(0.4)   |               |   |      |   | Sucrose       | 7.5g/100mL<br>and drank 330<br>mL/day                                                       | 24.8<br>(5)   |          |              |          |      |    |
| Control                         | 46 OW<br>(27M,<br>19W)  | 44<br>(7)  |              | 82.9<br>(10.8) | 27.9<br>(2.9) |                | 0.8<br>(0.5)   |               |   |      |   | Stevia        | 4mg/100mL<br>and drank 330<br>mL/day                                                        |               |          |              |          |      |    |
| Control                         | 45 OW<br>(27M,<br>18W)  | 42<br>(8)  |              | 82.4<br>(10.8) | 27.8<br>(2.3) |                | 0.5<br>(0.6)   |               |   |      |   | Sucralose     | 4mg/100mL<br>and drank 330<br>mL/day                                                        |               |          |              |          |      |    |
| <b>Sweetened Dairy</b>          |                         |            |              |                |               |                |                |               |   |      |   |               |                                                                                             |               |          |              |          |      |    |
| <b>Ellis et al.<br/>2011</b>    | 12<br>OW/OB             | 51<br>(15) | OP,<br>USA   | 86.6<br>(12.9) | 29.2<br>(2.3) | 3.0<br>(0.2)   | 2.1<br>(0.0)   | 1.2<br>(0.1)  | C | Supp | N |               |                                                                                             |               | NR       | Positiv<br>e |          | A, I | N  |
| Intervention                    |                         |            |              |                |               |                |                |               |   |      |   | Sucrose       | Freeze dried<br>strawberry<br>beverage (swe<br>etened milk)                                 | ~2.9(0.<br>6) |          |              | 6 wk     |      |    |

|                                  |                              |        |           |  |             |            |             |           |    |            |                                                   |            |                                         |             |          |          |      |   |   |
|----------------------------------|------------------------------|--------|-----------|--|-------------|------------|-------------|-----------|----|------------|---------------------------------------------------|------------|-----------------------------------------|-------------|----------|----------|------|---|---|
| Intervention                     |                              |        |           |  |             |            |             |           |    | Sucrose    | Freeze dried strawberry beverage (sweetened milk) | ~2.9(0.6)  | 6 wk                                    |             |          |          |      |   |   |
| Control                          |                              |        |           |  |             |            |             |           |    | Diet alone | No beverage                                       |            | 1 wk                                    |             |          |          |      |   |   |
| 100% Fruit Juice                 |                              |        |           |  |             |            |             |           |    |            |                                                   |            |                                         |             |          |          |      |   |   |
| Aghababae et al. 2015            | 72 hyperlipidemia (54M, 18W) |        | OP, Iran  |  |             |            | NR          | NR        | P  | Supp       | Y                                                 |            |                                         |             | Positive | 8 wk     | A    | N |   |
| Intervention                     | 36 hyperlipidemia            | 45 (8) |           |  | 85.3 (16.7) | 29.2 (4.5) | 1.0 (0.6)   |           |    |            |                                                   | Fruit      | 300 mL blackberry juice with pulp       | ~24.4 (3.6) | 58:28:14 |          |      |   |   |
| Control                          | 36 hyperlipidemia            | 46 (9) |           |  | 78.9 (9.8)  | 28.0 (3.4) | 1.3 (0.7)   |           |    |            |                                                   | Diet alone | No blackberry juice                     |             | 58:29:13 |          |      |   |   |
| Asgary et al. 2014               | 21 hypertensive (6 M, 15 W)  |        | OP, Iran  |  |             |            |             | NR        | P  | Supp       | N                                                 |            |                                         |             | NR       | Positive | 2 wk | A | N |
| Intervention                     | 11 hypertensive (3 M, 8 W)   | 59 (5) |           |  | 68.0 (10.1) | 26.8 (3.5) | 1.8 (1.6)   | 7.5 (4.8) |    |            |                                                   | Fruit      | 150 mL/d natural pomegranate juice      | ~19.9(4)    |          |          |      |   |   |
| Control                          | 10 hypertensive (3 M, 7 W)   | 47(12) |           |  | 73.5 (6.0)  | 28.0 (4.1) | 1.0 (0.5)   | 6.7 (3.8) |    |            |                                                   | Water      | 150 mL/d water                          |             |          |          |      |   |   |
| Castilla et al. 2008             | 16 hypolipidemic             | NR     | OP, Spain |  | NR          | NR         |             | NR        | NR | P          | Supp                                              | Y          |                                         |             | 50:35:15 | Positive | 2 wk | A | N |
| Intervention                     | 8 hypolipidemic              |        |           |  |             |            | 6.0 (5.1)   |           |    |            |                                                   | Fruit      | 100 mL/d red grape juice                | ~7.9(1.6)   |          |          |      |   |   |
| Control                          | 8 hypolipidemic              |        |           |  |             |            | 10.4 (9.6)  |           |    |            |                                                   | Diet alone | No red grape juice                      |             |          |          |      |   |   |
| Castilla et al. 2008 – Vitamin E | 16 hypolipidemic             | NR     | OP, Spain |  | NR          | NR         |             | NR        | NR | P          | Supp                                              | Y          |                                         |             | 50:35:15 | Positive | 2 wk | A | N |
| Intervention                     | 8 hypolipidemic              |        |           |  |             |            | 12.7 (10.7) |           |    |            |                                                   | Fruit      | 100 mL/d red grape juice with Vitamin E | ~7.9(1.6)   |          |          |      |   |   |

|                                   |                                            |  |                   |                    |                      |                         |              |               |                |      |                                          |               |                                                                      |                                                                                         |               |              |      |   |   |
|-----------------------------------|--------------------------------------------|--|-------------------|--------------------|----------------------|-------------------------|--------------|---------------|----------------|------|------------------------------------------|---------------|----------------------------------------------------------------------|-----------------------------------------------------------------------------------------|---------------|--------------|------|---|---|
|                                   | 8<br>hypolipide<br>mic                     |  | 13.0<br>(9.6)     |                    |                      |                         |              |               | Diet<br>alone  |      | No red grape<br>juice, plus<br>Vitamin E |               |                                                                      |                                                                                         |               |              |      |   |   |
| Control                           |                                            |  |                   |                    |                      |                         |              |               |                |      |                                          |               |                                                                      |                                                                                         |               |              |      |   |   |
| Fatel et al.<br>2021              | 41 RA<br>(9M, 32<br>W)                     |  | OP,<br>Brazil     |                    |                      |                         | NR           |               | P              | Supp | Y                                        |               |                                                                      | NR                                                                                      | Positiv<br>e  | 13<br>wk     | A, I | N |   |
| Intervention                      | 20 RA<br>(5M,<br>15W)                      |  | 57<br>(14)        |                    | 66.3<br>(22.1)       | 27.7<br>(7.5)           | 4.4<br>(4.6) | 3.3<br>(3.6)  |                |      |                                          | Fruit         | 500 ml/d<br>reduced<br>calorie<br>cranberry juice<br>+ 3g/d fish oil | 12.5<br>(2.5)                                                                           |               |              |      |   |   |
| Control                           | 21 RA<br>(4M,<br>17W)                      |  | 56<br>(14)        |                    | 67.0<br>(19.6)       | 27.6<br>(6.8)           | 3.7<br>(2.9) | 7.9<br>(10.0) |                |      |                                          | Diet<br>alone | 3 g/d fish oil                                                       |                                                                                         |               |              |      |   |   |
| Karlsen et<br>al. 2010            | 62 H but at<br>elevated<br>risk for<br>CVD |  | OP,<br>Norway     |                    |                      |                         |              |               | P              | Supp | Y                                        |               |                                                                      | NR                                                                                      | Positiv<br>e  | 4 wk         | A    | N |   |
| Intervention                      | 31 H<br>(21M,<br>10W) <sup>h</sup>         |  | 53<br>(34-<br>68) |                    | 79.4<br>(58-<br>105) | 25.6<br>(19.9-<br>31.7) | 1.3<br>(1.3) | 5.6<br>(57.8) | 21.2<br>(63.2) |      |                                          | Fruit         | 330 mL/d<br>bilberry juice                                           | ~39(7.8<br>)                                                                            |               |              |      |   |   |
| Control                           | 31 H                                       |  | 53<br>(30-<br>68) |                    | 81.3<br>(56-<br>112) | 25.5<br>(17.8-<br>31.5) | 1.0<br>(0.9) | 5.6<br>(33.5) | 11.5<br>(28.6) |      |                                          | Water         | 1 L water/d <sup>j</sup>                                             |                                                                                         |               |              |      |   |   |
| Leelarungr<br>ayub et al.<br>2016 | 29H<br>(20M,<br>9W)                        |  | 72<br>(9)         | OP,<br>Thailand    | 52.4<br>(8.2)        | NR                      | NR           | NR            | C              | Supp | N                                        |               |                                                                      | NR                                                                                      | Positiv<br>e  |              | A    | N |   |
| Intervention                      |                                            |  |                   |                    |                      |                         |              | 8.0<br>(1.2)  |                |      |                                          | Fruit         | 200g/d star<br>fruit juice                                           | 8.0<br>(1.6)                                                                            | 4wk           |              |      |   |   |
| Control                           |                                            |  |                   |                    |                      |                         |              | 7.7<br>(0.2)  |                |      |                                          | Diet<br>alone | No star fruit<br>juice                                               |                                                                                         |               | 2wk          |      |   |   |
| Ravn-<br>Haren et al.<br>2013     | 23 H<br>(9 M, 14<br>W)                     |  | 36<br>(18)        | OP,<br>Denmar<br>k | NR                   | 22.3<br>(2.6)           | NR           | NR            | NR             | C    | Supp                                     | Y             |                                                                      |                                                                                         | NR            | Positiv<br>e | 4wk  | A | N |
| Intervention                      |                                            |  |                   |                    |                      |                         |              |               |                |      |                                          |               | Fruit                                                                | 500 mL/d<br>polyphenolic<br>and pectin<br>restricted diet<br>with clear<br>apple juice  | 63<br>(~12.6) |              |      |   |   |
| Intervention                      |                                            |  |                   |                    |                      |                         |              |               |                |      |                                          |               | Fruit                                                                | 500 mL/d<br>polyphenolic<br>and pectin<br>restricted diet<br>with cloudy<br>apple juice | 51(~11.<br>8) |              |      |   |   |

|                      |  |                     |  |              |  |         |  |                  |  |             |  |           |  |            |  |                                                                  |  |                                           |  |                          |  |          |  |       |  |          |  |      |  |      |  |   |  |
|----------------------|--|---------------------|--|--------------|--|---------|--|------------------|--|-------------|--|-----------|--|------------|--|------------------------------------------------------------------|--|-------------------------------------------|--|--------------------------|--|----------|--|-------|--|----------|--|------|--|------|--|---|--|
| Control              |  |                     |  |              |  |         |  |                  |  |             |  |           |  | Fruit      |  | 22g/d polyphenolic and pectin restricted diet with apple pomance |  | 2.1(~0.0)                                 |  |                          |  |          |  |       |  |          |  |      |  |      |  |   |  |
| Control              |  |                     |  |              |  |         |  |                  |  |             |  |           |  | Diet alone |  | Polyphenolic and pectin restricted diet                          |  |                                           |  |                          |  |          |  |       |  |          |  |      |  |      |  |   |  |
| Simao et al. 2013    |  | 56 MetS (14M, 42W)  |  | OP, Brazil   |  | NR      |  |                  |  | P           |  | Supp      |  | N          |  |                                                                  |  | NR                                        |  | Positive                 |  | 9 wk     |  | A, I  |  | N        |  |      |  |      |  |   |  |
| Intervention         |  | 20 MetS (6M, 14W)   |  | 51 (42-53)   |  |         |  | 30.9 (26.3-38.4) |  | 56.9 (74.5) |  | 2.3 (0.7) |  | 1.9 (1.9)  |  | Fruit                                                            |  | 0.7 L/d cranberry juice (reduced energy)  |  | ~29.2 (5.8) <sup>i</sup> |  |          |  |       |  |          |  |      |  |      |  |   |  |
| Control              |  | 36 MetS (8M, 28W)   |  | 49 (45-56)   |  |         |  | 34.0 (31.3-36.9) |  | 54.7 (57.1) |  | 2.3 (0.7) |  | 2.4 (2.6)  |  | Diet alone                                                       |  | No cranberry juice                        |  | ~17.5 (3.5)              |  |          |  |       |  |          |  |      |  |      |  |   |  |
| Thimoteo et al. 2019 |  | 38 RA (0M, 38W)     |  | OP, Brazil   |  | NR      |  | 4.9 (5.9)        |  | NR          |  | NR        |  | P          |  | Supp                                                             |  | Y                                         |  | NR                       |  | Positive |  | 13 wk |  | A, I     |  | Y    |  |      |  |   |  |
| Intervention         |  | 20 RA (0M, 20W)     |  | 55 (51-65)   |  |         |  | 26 (23-30)       |  |             |  |           |  |            |  | Fruit                                                            |  | Reduced-calorie cranberry juice 500mL/day |  | ~12.5 (2.5)              |  |          |  |       |  |          |  |      |  |      |  |   |  |
| Control              |  | 18 RA (0M, 18W)     |  | 50.5 (40-60) |  |         |  | 30 (22-32)       |  |             |  |           |  |            |  | Diet alone                                                       |  | No cranberry juice                        |  |                          |  |          |  |       |  |          |  |      |  |      |  |   |  |
| Fruit                |  |                     |  |              |  |         |  |                  |  |             |  |           |  |            |  |                                                                  |  |                                           |  |                          |  |          |  |       |  |          |  |      |  |      |  |   |  |
| Basu et al. 2010     |  | 48 MetS (4 M, 44 W) |  | 50 (21)      |  | OP, USA |  | NR               |  | 37.8 (15.9) |  | NR        |  | NR         |  | NR                                                               |  | P                                         |  | Supp                     |  | Y        |  | NR    |  | Positive |  | 8 wk |  | A, I |  | N |  |
| Intervention         |  | 25 MetS (2 M, 23 W) |  | 52 (15)      |  |         |  | 38.1 (7.5)       |  |             |  |           |  |            |  | Fruit                                                            |  | 50 g/d free-dried blueberries             |  | ~30 (~6)                 |  |          |  |       |  |          |  |      |  |      |  |   |  |
| Control              |  | 23 MetS (2 M, 21 W) |  | 48 (16)      |  |         |  | 37.5 (14.4)      |  |             |  |           |  |            |  | Water                                                            |  | Water                                     |  |                          |  |          |  |       |  |          |  |      |  |      |  |   |  |
| Blum et al. 2007     |  | 103 H (35M, 68W)    |  | OP, Israel   |  | NR      |  |                  |  | NR          |  | NR        |  | P          |  | DA                                                               |  | Y                                         |  | NR                       |  | Positive |  | 4 wk  |  | I        |  | NR   |  |      |  |   |  |
| Intervention         |  | 50 H (17M, 33W)     |  | 46 (14)      |  |         |  | 28.1 (3.2)       |  | 0.4 (0.6)   |  |           |  |            |  | Fruit                                                            |  | 300 g/d tomatoes                          |  | ~7.9(1.6)                |  |          |  |       |  |          |  |      |  |      |  |   |  |

|                       |                                          |               |               |                |               |              |              |              |   |      |   |               |                                                                           |               |               |      |      |    |
|-----------------------|------------------------------------------|---------------|---------------|----------------|---------------|--------------|--------------|--------------|---|------|---|---------------|---------------------------------------------------------------------------|---------------|---------------|------|------|----|
| Control               | 53 H<br>(18M, 35W)                       | 45<br>(14)    |               | 30.1<br>(1.5)  | 0.5<br>(0.5)  |              |              |              |   |      |   | Diet<br>alone | No tomatoes                                                               |               |               |      |      |    |
| Dow et al.<br>2013    | 69<br>OW/OB<br>(21 M, 48 W)              | 42<br>(11)    | OP,<br>USA    | 91.5<br>(13.9) | 32.1<br>(4.1) |              | NR           | NR           | P | Supp | Y |               |                                                                           |               | Positiv<br>e  | 6 wk | A    | N  |
| Intervention          | 37<br>OW/OB<br>(12 M, 25 W) <sup>k</sup> | 41<br>(11)    |               | 92.1<br>(15.0) | 32.8<br>(4.2) | 2.2<br>(1.5) |              |              |   |      |   | Fruit         | 0.5 fresh red<br>grapefruit/d 3<br>times a day (so<br>1.5<br>grapefruits) | ~24<br>(4.8)  | ~50:34:1<br>6 |      |      |    |
| Control               | 32<br>OW/OB (9<br>M, 23 W) <sup>m</sup>  | 43<br>(11)    |               | 90.8<br>(12.8) | 31.4<br>(3.8) | 2.4<br>(2.0) |              |              |   |      |   | Diet<br>alone | No grapefruit                                                             |               | ~48:37:1<br>6 |      |      |    |
| Franck et<br>al. 2020 | 48 risk of<br>MetS<br>(16M, 32W)         |               | OP,<br>Canada | NR             |               |              | NR           | NR           | P | Supp | Y |               |                                                                           |               | Positiv<br>e  | 8 wk | I    | N  |
| Intervention          | 24<br>(7M, 17W)                          | 33<br>(10)    |               |                | 30.4<br>(5)   | 2.7<br>(2.3) |              |              |   |      |   | Fruit         | 280g frozen<br>raspberries (2<br>cups)/d                                  | 12.4<br>(2.4) | 48:35:17      |      |      |    |
| Control               | 24<br>(9M, 15W)                          | 32<br>(8)     |               |                | 29.4<br>(3.9) | 2.7<br>(2.8) |              |              |   |      |   | Diet<br>alone | Usual diet, no<br>supplementati<br>on                                     |               | 42:40:18      |      |      |    |
| Kelley et al.<br>2013 | 18 H (2 M,<br>16 W)                      | 50<br>(45-61) | OP,<br>USA    |                | 26.3<br>(3.8) | NR           | NR           | NR           | C | Supp | N |               |                                                                           | NR            | Neutra<br>l   |      | A, I | NR |
| Intervention          |                                          |               |               |                |               |              |              |              |   |      |   | Fruit         | Sweet bing<br>cherries                                                    |               | 50:33:16      | 4 wk |      |    |
| Control               |                                          |               |               |                |               |              |              |              |   |      |   | Diet<br>alone | No cherries                                                               |               | 55:32:14      | 1 wk |      |    |
| Liddle et<br>al. 2021 | 44 OW/O<br>B (14M,<br>30W)               |               | OP,<br>Canada |                |               |              |              |              | P | Supp | Y |               |                                                                           |               | Positiv<br>e  | 6 wk | A, I | N  |
| Intervention          | 22<br>OW/OW<br>(7 M, 15 W)               | 43<br>(19-69) |               | 94.9<br>(23)   | 33.2<br>(6.1) | 3.0<br>(0.9) | 1.4<br>(0.4) | 6.7<br>(1.3) |   |      |   | Fruit         | 3 whole small<br>Gala apples<br>(200g edible<br>parts)                    | 17.5<br>(3.2) | 49:34:16      |      |      |    |
| Control               | 22<br>OW/OB<br>(7 M, 15 W)               | 48<br>(24-69) |               | 96.6<br>(18.8) | 33.3<br>(5.6) | 3.1<br>(1.2) | 1.2<br>(0.6) | 6.2<br>(1.3) |   |      |   | Diet<br>alone | No apples                                                                 |               | 43:40:17      |      |      |    |



|                               |                                 |            |                |                |               |              |                |               |   |      |   |            |                                                                   |                |          |          |       |      |   |
|-------------------------------|---------------------------------|------------|----------------|----------------|---------------|--------------|----------------|---------------|---|------|---|------------|-------------------------------------------------------------------|----------------|----------|----------|-------|------|---|
| <b>Ravn-Haren et al. 2013</b> | 23 H<br>(9 M, 14 W)             | 36<br>(18) | OP,<br>Denmark |                | 22.3<br>(2.5) | NR           | NR             | NR            | C | Supp | Y |            |                                                                   |                | NR       | Positive | 4 wk  | A    | N |
| Intervention                  |                                 |            |                |                |               |              |                |               |   |      |   | Fruit      | Polyphenolic and pectin restricted diet with 550 g whole apples/d | ~51<br>(10)    |          |          |       |      |   |
| Control                       |                                 |            |                |                |               |              |                |               |   |      |   | Fruit      | Polyphenolic and pectin restricted diet with 22 g apple pomace/d  | 2.1<br>(~0.0)  |          |          |       |      |   |
| Control                       |                                 |            |                |                |               |              |                |               |   |      |   | Diet alone | Polyphenolic and pectin restricted diet with apple pomace         |                |          |          |       |      |   |
| <b>Schell et al. 2019</b>     | 22 T2D                          | 54<br>(21) | OP,<br>USA     | 104<br>(55)    | 35.3<br>(10)  |              |                |               | C | Supp | Y |            |                                                                   |                |          | Positive | 4 wk  | A, I | Y |
| Intervention                  |                                 |            |                |                |               | 5.1<br>(5.6) | 12.5<br>(31.0) | 5.5<br>(7.0)  |   |      |   | Fruit      | 250 g frozen raspberries per day (pureed)                         | ~11.1<br>(2.2) | 48:34:17 |          |       |      |   |
| Control                       |                                 |            |                |                |               | 5.3<br>(5.6) | 8.5<br>(19.2)  | 4.4<br>(11.7) |   |      |   | Diet alone | Continue typical diet                                             |                | 45:37:16 |          |       |      |   |
| <b>Dried Fruit</b>            |                                 |            |                |                |               |              |                |               |   |      |   |            |                                                                   |                |          |          |       |      |   |
| <b>Hooshmand et al. 2016</b>  |                                 | 71<br>(3)  | OP,<br>USA     | 65.0<br>(10.6) | 25.0<br>(4.3) |              | NR             | NR            | P | Supp | Y |            |                                                                   |                |          | Positive | 24 wk | A, I | N |
| Intervention                  | 13<br>osteopenic<br>(0 M, 13W)  |            |                |                |               | 1.7<br>(0.4) |                |               |   |      |   | Fruit      | 100 g/d dried plum                                                | ~38.1<br>(8.6) | 53:37:16 |          |       |      |   |
| Intervention                  | 13<br>osteopenic<br>(0 M, 13W)  |            |                |                |               | 1.8<br>(0.4) |                |               |   |      |   | Fruit      | 50 g/d dried plum                                                 | ~19.1<br>(3.8) | 48:34:14 |          |       |      |   |
| Control                       | 16<br>osteopenic<br>(0 M, 16 W) |            |                |                |               | 1.6<br>(0.2) |                |               |   |      |   | Diet alone | No dried plums                                                    |                | 51:32:15 |          |       |      |   |
| <b>Irannejad et al. 2020</b>  | 72 T2D<br>(21 M, 51 W)          |            | OP, Iran       |                |               |              | NR             | NR            | P | Supp | Y |            |                                                                   |                |          | Positive | 12 wk | A    | N |

|                                  |                     |         |           |           |             |            |           |             |   |      |   |  |            |                                                                                                      |            |          |    |          |       |      |   |
|----------------------------------|---------------------|---------|-----------|-----------|-------------|------------|-----------|-------------|---|------|---|--|------------|------------------------------------------------------------------------------------------------------|------------|----------|----|----------|-------|------|---|
| Intervention                     | 36 T2D (8 M, 28 W)  | 53 (8)  |           | 76 (13)   | 29 (4)      | 32(16.6)   |           |             |   |      |   |  | Fruit      | 30g/d z. vulgaris                                                                                    | 14.3(3.8)  | 70:18:16 |    |          |       |      |   |
| Control                          | 36 T2D (13 M, 23 W) | 57 (6)  |           | 75 (11)   | 28 (4)      | 26.6(14)   |           |             |   |      |   |  | Diet alone | Diet alone                                                                                           |            | 69:17:15 |    |          |       |      |   |
| Sweetened Cereal Grains and Bars |                     |         |           |           |             |            |           |             |   |      |   |  |            |                                                                                                      |            |          |    |          |       |      |   |
| Mietus-Snyder et al. 2012        | 25 H (10M, 15W)     | 45 (16) | OP, USA   | NR        | 25.7 (14.3) | 1.8 (2.2)  | NR        | NR          | C | Supp | N |  |            |                                                                                                      |            |          | NR | Positive | 2 wk  | A, I | N |
| Intervention                     |                     |         |           |           |             |            |           |             |   |      |   |  | Mixed type | 2 servings/d nutrition bars (blueberry, cranberry, red grape, dried plum concentrates and chocolate) | ~15.2 (3)  |          |    |          |       |      |   |
| Control                          |                     |         |           |           |             |            |           |             |   |      |   |  | Diet alone | No nutrition bar                                                                                     |            |          |    |          |       |      |   |
| Sweets and Desserts              |                     |         |           |           |             |            |           |             |   |      |   |  |            |                                                                                                      |            |          |    |          |       |      |   |
| Alavinejad et al. 2015           | 42 NAFLD (35M, 9W)  |         | OP, Iran  |           |             |            | NR        | NR          | P | Supp | Y |  |            |                                                                                                      |            |          | NR | Positive | 12 wk | A, I | N |
| Intervention                     | 21 NAFLD (19M, 3W)  | 38 (11) |           |           | 88.6 (13.2) | 30.3 (3.6) | 1.4 (4.7) |             |   |      |   |  | Sucrose    | Dark Chocolate                                                                                       | ~6.1 (1.2) |          |    |          |       |      |   |
| Control                          | 21 NAFLD (16M, 6W)  | 38 (10) |           |           | 84.9 (20.6) | 29.7 (5.8) | 2.0 (9.2) |             |   |      |   |  | Fat        | White Chocolate                                                                                      |            |          |    |          |       |      |   |
| Jafarirad et al. 2018            | 44 T2D (17M, 27W)   | 52 (6)  | OP, Iran  | NR        | NR          |            |           |             | P | Supp | Y |  |            |                                                                                                      |            |          |    | Positive | 8 wk  | A    | N |
| Intervention                     | 21 T2D (7M, 14W)    | 51 (8)  |           |           |             | 4.2 (1.3)  | 6.6 (3.8) | 34.3 (21.8) |   |      |   |  | Sucrose    | 84% dark chocolate                                                                                   | 5.5 (1.1)  | 56:27:18 |    |          |       |      |   |
| Control                          | 23 T2D (10M, 13W)   | 51 (8)  |           |           |             | 3.2 (1.3)  | 4.2 (2.2) | 24.6 (10.2) |   |      |   |  | Diet alone | no chocolate                                                                                         |            | 58:23:19 |    |          |       |      |   |
| Martini et al. 2020              | 21 NW (10M, 11W)    | 23 (2)  | OP, Italy | 67 (12.4) | 22.3 (7.8)  | NR         | NR        | NR          | C | Supp | Y |  |            |                                                                                                      |            |          |    | Positive | 4 wk  | I    | N |

|                                  |                    |         |                  |             |            |            |           |           |      |   |                 |                                                                              |             |          |          |       |   |    |
|----------------------------------|--------------------|---------|------------------|-------------|------------|------------|-----------|-----------|------|---|-----------------|------------------------------------------------------------------------------|-------------|----------|----------|-------|---|----|
| Intervention                     |                    |         |                  |             |            |            |           |           |      |   | Sucrose         | 1 cup espresso + 2 cocoa-based products containing coffee/d                  | 43.4 (8.2)  | 47:37:16 |          |       |   |    |
| Control                          |                    |         |                  |             |            |            |           |           |      |   | Water           | 1 cup espresso/d                                                             |             | 49:38:13 |          |       |   |    |
| Added Sweeteners                 |                    |         |                  |             |            |            |           |           |      |   |                 |                                                                              |             |          |          |       |   |    |
| <b>Ghazali et al. 2017</b>       | 64 smokers         | 38 (8)  | OP, Malaysia     | NR          | NR         |            |           | P         | Supp | Y |                 |                                                                              |             | NR       | Positive | 12 wk | A | NR |
| Intervention                     |                    |         |                  |             |            | 2.3 (1.8)  | 1.6 (1.1) | 2.6 (8.2) |      |   | Honey           | 20 g/d Malaysian Tualang honey                                               | ~16.4 (3.3) |          |          |       |   |    |
| Control                          |                    |         |                  |             |            | 2.9 (13.5) | 2.0 (1.5) | 3.0 (0.7) |      |   | Diet alone      | No honey                                                                     |             |          |          |       |   |    |
| <b>Pothasak et al. 2020</b>      | 60 COPD (31M, 29W) |         | OP, Thailand     |             | NR         | NR         |           | P         | Supp | Y |                 |                                                                              |             | NR       | Positive | 4 wk  | A | N  |
| Intervention                     | 20 COPD (8M, 12W)  | 71 (27) |                  | 50.7 (12.4) | 21.7 (6.1) |            |           |           |      |   | Honey           | 10g/d starfruit honey mixed in 150mL water                                   | 8.2 (1.6)   |          |          |       |   |    |
| Intervention                     | 15 COPD (8M, 7W)   | 64 (6)  |                  | 51.6 (13.5) | 20.9 (4.6) |            |           |           |      |   | Honey (Ex)      | 10g/d starfruit honey mixed in 150mL water with 3x 30min/wk walking exercise | 8.2 (1.6)   |          |          |       |   |    |
| Control                          | 10 COPD (5M, 5W)   | 69 (4)  |                  | 56.5 (11.8) | 23.5 (7.2) |            |           |           |      |   | Diet alone      | No honey                                                                     |             |          |          |       |   |    |
| Control                          | 15 COPD (10M, 5W)  | 61 (13) |                  | 58.4 (17.1) | 20.5 (4.4) |            |           |           |      |   | Diet alone (Ex) | No honey with 3x 30min/wk walking exercise                                   |             |          |          |       |   |    |
| Subtraction Trials               |                    |         |                  |             |            |            |           |           |      |   |                 |                                                                              |             |          |          |       |   |    |
| Food Source:                     |                    |         |                  |             |            |            |           |           |      |   |                 |                                                                              |             |          |          |       |   |    |
| SSB                              |                    |         |                  |             |            |            |           |           |      |   |                 |                                                                              |             |          |          |       |   |    |
| <b>Campos et al. 2015 (IHCL)</b> | 12 OW/OB           | 28(7)   | OP, Switzerl and |             | NR         | NR         |           | P         | Supp | Y |                 |                                                                              |             |          | Negative | 12 wk | A | NR |

|                                                  |                                      |                        |                        |                             |                            |              |    |    |   |      |         |                                                               |                                     |                |              |          |      |   |
|--------------------------------------------------|--------------------------------------|------------------------|------------------------|-----------------------------|----------------------------|--------------|----|----|---|------|---------|---------------------------------------------------------------|-------------------------------------|----------------|--------------|----------|------|---|
| <60mmol/L<br>)                                   |                                      |                        |                        |                             |                            |              |    |    |   |      |         |                                                               |                                     |                |              |          |      |   |
| Intervention                                     | 6 OW/OB                              |                        |                        | 85.6<br>(11.3)              | 30.1(4.<br>9)              | 2.3(1.1<br>) |    |    |   |      | NNS     | Replace SSB<br>with NSB                                       | ~86.8<br>(15)                       | 46:38:16       |              |          |      |   |
|                                                  | 6 OW/OB                              |                        |                        | 78.5<br>(7.1)               | 26.9(1.<br>2)              | 4.4(4.2<br>) |    |    |   |      | Sucrose | Habitual SSB<br>intake (SSB<br>and sugar<br>sweetened<br>tea) |                                     | 51:34:15       |              |          |      |   |
| Control                                          |                                      |                        |                        |                             |                            |              |    |    |   |      |         |                                                               |                                     |                |              |          |      |   |
| Campos et<br>al. 2015<br>(IHCL<br>>60mmol/L<br>) | 15<br>OW/OB                          | 29<br>(7)              | OP,<br>Switzerl<br>and |                             |                            |              | NR | NR | P | Supp | Y       |                                                               |                                     | Negati<br>ve   | 12<br>wk     | A        | NR   |   |
| Intervention                                     | 8 OW/OB                              |                        |                        | 102.2<br>(12.2)             | 32.5<br>(4.5)              | 4.8<br>(4.4) |    |    |   |      | NNS     | Replace SSB<br>with NSB                                       | ~86.8<br>(15)                       | 46:38:16       |              |          |      |   |
|                                                  | 7 OW/OB                              |                        |                        | 100.0<br>(11.6)             | 33.8<br>(5.6)              | 2.1<br>(0.7) |    |    |   |      | Sucrose | Habitual SSB<br>intake (SSB<br>and sugar<br>sweetened<br>tea) |                                     | 51:34:15       |              |          |      |   |
| Control                                          |                                      |                        |                        |                             |                            |              |    |    |   |      |         |                                                               |                                     |                |              |          |      |   |
| Ebbeling et<br>al. 2020                          | 120 MW<br>(72M,<br>48W) <sup>h</sup> |                        | OP,<br>USA             |                             |                            |              | NR | NR | P | Supp | Y       |                                                               |                                     | NR             | Negati<br>ve | 48<br>wk | A, I | N |
| Intervention                                     | 60 MW<br>(36M,<br>24W) <sup>h</sup>  | 27<br>(6) <sup>f</sup> |                        | 76.8<br>(16.7) <sup>f</sup> | 26.1<br>(5.2) <sup>f</sup> | 1.2<br>(1.5) |    |    |   |      |         | NNS                                                           | substitute all<br>SSB with<br>ASB   |                |              |          |      |   |
| Intervention                                     | 66 MW<br>(39M,<br>27W) <sup>h</sup>  | 28<br>(6) <sup>f</sup> |                        | 77.5<br>(16.1) <sup>f</sup> | 26.6<br>(4.6) <sup>f</sup> | 0.9<br>(0.7) |    |    |   |      |         | water                                                         | substitute all<br>SSB with<br>water |                |              |          |      |   |
| Control                                          | 60 MW<br>(36M,<br>24W) <sup>h</sup>  | 26<br>(5) <sup>f</sup> |                        | 75.5<br>(15.6) <sup>f</sup> | 25.8<br>(4.7) <sup>f</sup> | 1.2<br>(1.5) |    |    |   |      |         | HFCS                                                          | SSB (usual<br>intake)               | 84.5<br>(15.3) |              |          |      |   |

| Ad libitum Trials         |                 |         |        |             |            |  |    |    |   |      |   |  |  |  |                     |      |   |   |
|---------------------------|-----------------|---------|--------|-------------|------------|--|----|----|---|------|---|--|--|--|---------------------|------|---|---|
| Food Source:              |                 |         |        |             |            |  |    |    |   |      |   |  |  |  |                     |      |   |   |
| Mixed Sources (with SSBs) |                 |         |        |             |            |  |    |    |   |      |   |  |  |  |                     |      |   |   |
| Markey et al. 2016        | 50 H (16M, 34W) | 32 (10) | OP, UK | 69.8 (11.4) | 24.0 (3.3) |  | NR | NR | C | Supp | Y |  |  |  | Neutra <sub>l</sub> | 8 wk | I | N |

|                      |                           |           |                    |                |               |              |    |    |           |                                                                                                      |                          |              |          |   |    |
|----------------------|---------------------------|-----------|--------------------|----------------|---------------|--------------|----|----|-----------|------------------------------------------------------------------------------------------------------|--------------------------|--------------|----------|---|----|
| Intervention         | 22 H<br>(7M, 15F)         |           |                    | 70.1<br>(11.3) | 24.1<br>(3.3) | 1.1<br>(1.4) |    |    | Sucrose   | Exchange ≥1 food portion and ≥1 beverage per day from habitual diet with sugar containing products   | ~30 (6)                  | 54:30:14     |          |   |    |
|                      | 28 H<br>(9M, 19F)         |           |                    | 69.8<br>(11.5) | 24.0<br>(3.4) | 0.9<br>(0.9) |    |    | Sweetener | Exchange ≥1 food portion and ≥1 beverage per day from habitual diet with sugar reformulated products |                          | 48:33:15     |          |   |    |
| Control              |                           |           |                    |                |               |              |    |    |           |                                                                                                      |                          |              |          |   |    |
| Munsters et al. 2010 | 29<br>OW/OB<br>(14M, 15W) | 39<br>(2) | OP,<br>Netherlands |                |               | 3.0<br>(2.9) | NR | NR | P         | Supp                                                                                                 | Y                        | Neutral      | 24<br>wk | A | NR |
| Intervention         | 14<br>OW/OB<br>(7M, 7W)   | 40<br>(2) |                    | 85.3<br>(9.4)  | 28.6<br>(1.5) |              |    |    |           | Mixed type                                                                                           | Simple carbohydrate diet | ~126<br>(19) | 42:40:15 |   |    |
| Control              | 15<br>OW/OB<br>(7M, 8W)   | 39<br>(2) |                    | 83.2<br>(9.3)  | 28.3<br>(1.5) |              |    |    |           | Mixed comparator                                                                                     | Complex carbohydrates    |              | 45:39:13 |   |    |
| Control              | 18<br>OW/OB<br>(10M, 8W)  | 37<br>(2) |                    | 88.5<br>(11.5) | 29.9<br>(3.0) |              |    |    |           | Mixed comparator                                                                                     | Control diet             |              | 45:39:14 |   |    |

%C=percent carbohydrate; %E=percentage of total energy intake; %F=percent fat; %P=percent protein; A=agency funding; B=boy; BMI=body mass index; BW=body weight; C=crossover trial; Ca=calcium; CKD=chronic kidney disease; COPD=chronic obstructive pulmonary disease; CVD=cardiovascular disease; d=day; DA=dietary advice; EB=energy balance; F=female; G=girl; H=healthy (mixed weight); HFCS=high-fructose corn syrup; HI=hyperinsulinemic; HTN=hypertension; I=industry funding; IBW=ideal body weight; IGT=impaired glucose tolerance; IHCL=intrahepatocellular lipid; IP=in-patient setting; M=male; Met=metabolic diet; mo=month; N=no; NAFLD=non-alcoholic fatty liver disease; NNS=non-nutritive sweetener; NR=not reported; NSB=non-nutritive sweetened beverage; OffT2D=offspring of type 2 diabetic parents; OP=out-patient setting; OW/OB= overweight/obese body mass index; P=parallel trial; RA= Rheumatoid Arthritis; SD=standard deviation; SF=stone former; SSB=sugar-sweetened beverage; Supp=supplemented diet; T1DM=type 1 diabetes mellitus; T2D=type 2 diabetes mellitus; UK=United Kingdom; USA=United States of America; wk(s)=week(s); Y=yes ; yr=year; CRP= C reactive protein, TNF-α = tumour necrosis factor alpha, IL-6= interleukin 6.

<sup>a</sup>Metabolic feeding control included provision of all study foods, supplement feeding control included provision of study supplements only, and dietary advice included dietary counselling without the provision of any dietary foods or supplements.

<sup>b</sup>Dose preceded by “~” represent approximates calculated on the basis of average energy intake reported by participants. In the absence of this data, an average of 2000 kcal/d was assumed.

<sup>c</sup>Total energy intake in the form of carbohydrate:fat:protein

<sup>d</sup>Positive energy balance included interventions designed to consume excess calories on top of a baseline diet. Negative energy balance included interventions designed to create a calorie deficit compared to the baseline diet. Neutral energy balance included interventions designed to continue habitual caloric intake.

<sup>e</sup>Agency funding included government, not-for-profit health agencies or University sources.

<sup>f</sup>Data measured in N=32 participants at baseline.

<sup>g</sup>Measured using values taken from :

<https://fineli.fi/fineli/en/elintarvikkeet/442?q=bilberr&foodType=ANY&portionUnit=G&portionSize=100&sortByColumn=points&sortOrder=asc&component=2331>

<sup>h</sup>18 participants out of the intervention group were evaluated for CRP and included in the present analysis

<sup>i</sup>Fructose-containing sugars dose estimated from: <https://www.oceanspray.com/Products/Juices/By-Type/Classic-Juice-Drinks/Cranberry-Juice-Cocktail>.

<sup>j</sup>Fructose-containing sugars dose estimated from: <https://www.pomefresh.com/products/pomefresh-100-organic-bilberry-juice-1l>

<sup>k/m</sup>14/15 participants respectively in intervention and control were diagnosed with metabolic syndrome

**Supplemental Table S6: Sensitivity analyses of the use of correlation coefficients of 0.25 and 0.75 for crossover trials in the primary analysis of the effect of important food sources of fructose-containing sugars on biomarkers of inflammation outcomes**

| Inflammation Outcome                                     | MD [95% CI], P <sub>MD</sub><br>I <sup>2</sup> , P <sub>Q</sub>                                        |                                                                                                         |                                                                                                        |
|----------------------------------------------------------|--------------------------------------------------------------------------------------------------------|---------------------------------------------------------------------------------------------------------|--------------------------------------------------------------------------------------------------------|
|                                                          | Correlation Coefficient used in the Primary Analysis                                                   | Correlation Coefficient used in Sensitivity Analyses                                                    |                                                                                                        |
| Energy Design and Food Source (N crossover trials/total) | 0.5                                                                                                    | 0.25                                                                                                    | 0.75                                                                                                   |
| <b>CRP (mg/L)</b>                                        |                                                                                                        |                                                                                                         |                                                                                                        |
| <b>Substitution (15/37)</b>                              | <b>0.074[-0.077, 0.224],<br/>P<sub>MD</sub>=0.336<br/>I<sup>2</sup>=53.70%, P<sub>Q</sub>&lt;0.001</b> | <b>0.080[-0.053, 0.214],<br/>P<sub>MD</sub>=0.24<br/>I<sup>2</sup>=53.76%, P<sub>Q</sub>&lt;0.001</b>   | <b>0.055[-0.06, 0.167],<br/>P<sub>MD</sub>=0.34<br/>I<sup>2</sup>=54.65%, P<sub>Q</sub>&lt;0.001</b>   |
| SSB (6/10)                                               | 0.07 [-0.16, 0.30] ,<br>P <sub>MD</sub> =0.543<br>I <sup>2</sup> =0.00%, P <sub>Q</sub> =0.450         | 0.096 [-0.17, 0.36] ,<br>P <sub>MD</sub> =0.47<br>I <sup>2</sup> =0.00%, P <sub>Q</sub> =0.468          | 0.045 [-0.12, 0.212] ,<br>P <sub>MD</sub> =0.59<br>I <sup>2</sup> =0.79%, P <sub>Q</sub> =0.431        |
| Sweetened dairy (0/3)                                    | -0.06 [-0.51, 0.39] ,<br>P <sub>MD</sub> =0.802<br>I <sup>2</sup> = 0.00%, P <sub>Q</sub> =0.63        | NA                                                                                                      | NA                                                                                                     |
| Sweetened dairy alternative (soy) (0/1)                  | -0.96 [-1.67, -0.25] ,<br>P <sub>MD</sub> =0.008<br>I <sup>2</sup> = .%, P <sub>Q</sub> = .            | NA                                                                                                      | NA                                                                                                     |
| 100% Fruit juice (0/2)                                   | -1.09 [-2.01, -0.17] ,<br>P <sub>MD</sub> =0.021<br>I <sup>2</sup> = 0.00%, P <sub>Q</sub> =0.591      | NA                                                                                                      | NA                                                                                                     |
| Fruit (2/5)                                              | -0.43 [-0.87, 0.01] ,<br>P <sub>MD</sub> =0.055<br>I <sup>2</sup> =34.3%, P <sub>Q</sub> =0.193        | -0.43 [-0.89, 0.02] ,<br>P <sub>MD</sub> =0.060<br>I <sup>2</sup> =34.31%, P <sub>Q</sub> =0.193        | -0.43 [-0.85, -0.01] ,<br><b>P<sub>MD</sub>=0.045</b><br>I <sup>2</sup> =34.33%, P <sub>Q</sub> =0.192 |
| Dried fruit (1/4)*                                       | 0.21 [-0.14, 0.55] ,<br>P <sub>MD</sub> =0.240<br>I <sup>2</sup> =0.00%, P <sub>Q</sub> =0.683         | NA                                                                                                      | NA                                                                                                     |
| Mixed fruit forms (0/1)                                  | -0.10 [-1.20, 1.00] ,<br>P <sub>MD</sub> =0.859<br>I <sup>2</sup> = .%, P <sub>Q</sub> =.              | NA                                                                                                      | NA                                                                                                     |
| Added nutritive (caloric) sweeteners (1/1)               | -0.03 [-0.11, 0.05] ,<br>P <sub>MD</sub> =0.464<br>I <sup>2</sup> = .%, P <sub>Q</sub> =.              | -0.03 [-0.12, 0.06] ,<br>P <sub>MD</sub> =0.523<br>I <sup>2</sup> = .%, P <sub>Q</sub> =.               | -0.03 [-0.095, 0.035] ,<br>P <sub>MD</sub> =0.363<br>I <sup>2</sup> = .%, P <sub>Q</sub> =.            |
| Mixed sources (with SSBs) (2/6)*                         | 0.643 [0.118, 1.168] ,<br>P <sub>MD</sub> =0.016<br>I <sup>2</sup> =82.91%, P <sub>Q</sub> <0.001      | NA                                                                                                      | NA                                                                                                     |
| Mixed sources (without SSBs) (3/4)                       | 0.29 [-0.21, 0.78] ,<br>P <sub>MD</sub> =0.26<br>I <sup>2</sup> =0.00%, P <sub>Q</sub> =0.78           | 0.19 [-0.24, 0.63] ,<br>P <sub>MD</sub> =0.38<br>I <sup>2</sup> =0.00%, P <sub>Q</sub> =0.66            | 0.063 [-0.204, 0.33] ,<br>P <sub>MD</sub> =0.64<br>I <sup>2</sup> =0.00%, P <sub>Q</sub> =0.52         |
| <b>Addition (13/37)</b>                                  | <b>-0.18 [-0.33, -0.028],<br/>P<sub>MD</sub>= 0.020<br/>I<sup>2</sup>=43.67%, P<sub>Q</sub>=0.003</b>  | <b>-0.202 [-0.36, -0.045],<br/>P<sub>MD</sub>= 0.012<br/>I<sup>2</sup>=41.88%, P<sub>Q</sub>=0.0046</b> | <b>-0.15 [-0.29, -0.003],<br/>P<sub>MD</sub>=0.045<br/>I<sup>2</sup>=47.69%, P<sub>Q</sub>=0.0008</b>  |

|                                              |                                                                                                               |                                                                                                                 |                                                                                                                |
|----------------------------------------------|---------------------------------------------------------------------------------------------------------------|-----------------------------------------------------------------------------------------------------------------|----------------------------------------------------------------------------------------------------------------|
| SSB (4/7)                                    | 0.02 [-0.15, 0.19] ,<br>P <sub>MD</sub> =0.79<br>I <sup>2</sup> =30.88%, P <sub>Q</sub> =0.19                 | 0.013 [-0.16, 0.19] ,<br>P <sub>MD</sub> =0.88<br>I <sup>2</sup> =28.38%, P <sub>Q</sub> =0.222                 | 0.04 [-0.11, 0.2] ,<br>P <sub>MD</sub> =0.59<br>I <sup>2</sup> =36.70%, P <sub>Q</sub> =0.15                   |
| Sweetened dairy<br>alternative (soy) (0/2)   | 0.20 [-0.78, 1.18] ,<br>P <sub>MD</sub> =0.689<br>I <sup>2</sup> =52.0%, P <sub>Q</sub> =0.149                | NA                                                                                                              | NA                                                                                                             |
| 100% Fruit juice (4/12)                      | -0.12 [-0.53, 0.295] ,<br>P <sub>MD</sub> =0.58<br>I <sup>2</sup> =49.29%, P <sub>Q</sub> =0.03               | -0.15 [-0.59, 0.285] ,<br>P <sub>MD</sub> =0.5<br>I <sup>2</sup> =46.41%, P <sub>Q</sub> =0.039                 | -0.071 [-0.45, 0.305] ,<br>P <sub>MD</sub> =0.71<br>I <sup>2</sup> =54.62%, P <sub>Q</sub> =0.012              |
| Fruit (4/9)                                  | -0.50 [-0.75, -0.25] ,<br>P <sub>MD</sub> =0.000<br>I <sup>2</sup> =0.00%, P <sub>Q</sub> =0.960              | -0.52 [-0.77, -0.27] ,<br>P <sub>MD</sub> =0.000<br>I <sup>2</sup> =0.00%, P <sub>Q</sub> =0.978                | -0.45 [-0.68, -0.23] ,<br>P <sub>MD</sub> =0.000<br>I <sup>2</sup> =0.00%, P <sub>Q</sub> =0.892               |
| Dried fruit (0/3)                            | 0.02 [-0.75, 0.79] ,<br>P <sub>MD</sub> =0.962<br>I <sup>2</sup> =0.00%, P <sub>Q</sub> =0.575                | NA                                                                                                              | NA                                                                                                             |
| Sweetened cereal grains &<br>bars (1/1)*     | -0.30 [-0.79, 0.19] ,<br>P <sub>MD</sub> =0.228<br>I <sup>2</sup> = . %, P <sub>Q</sub> =.                    | NA                                                                                                              | NA                                                                                                             |
| Sweets and desserts (0/2)                    | -0.67 [-1.85, 0.50] ,<br>P <sub>MD</sub> =0.26<br>I <sup>2</sup> =86.8%, P <sub>Q</sub> =0.006                | NA                                                                                                              | NA                                                                                                             |
| Added nutritive (caloric)<br>sweetener (0/1) | 0.56 [-4.19, 5.31] ,<br>P <sub>MD</sub> =0.817<br>I <sup>2</sup> = . %, P <sub>Q</sub> =.                     | NA                                                                                                              | NA                                                                                                             |
| <b>Subtraction (0/4)</b>                     | <b>0.14 [-0.29, 0.56],</b><br><b>P<sub>MD</sub>=0.522</b><br><b>I<sup>2</sup>=0.00%, P<sub>Q</sub>=0.877</b>  | NA                                                                                                              | NA                                                                                                             |
| SSB (0/4)                                    | 0.14 [-0.29, 0.56],<br>P <sub>MD</sub> =0.522<br>I <sup>2</sup> =0.00%, P <sub>Q</sub> =0.877                 | NA                                                                                                              | NA                                                                                                             |
| <b>Ad Libitum (1/3)*</b>                     | <b>-0.09 [-0.44, 0.25],</b><br><b>P<sub>MD</sub>=0.604</b><br><b>I<sup>2</sup>=0.00%, P<sub>Q</sub>=0.910</b> | NA                                                                                                              | NA                                                                                                             |
| SSBs (and other food<br>sources) (1/3)*      | -0.09 [-0.44, 0.25] ,<br>P <sub>MD</sub> =0.604<br>I <sup>2</sup> =0.00%, P <sub>Q</sub> =0.910               | NA                                                                                                              | NA                                                                                                             |
| <b>TNF-<math>\alpha</math> (pg/mL)</b>       |                                                                                                               |                                                                                                                 |                                                                                                                |
| <b>Substitution (5/17)</b>                   | <b>0.04 [-0.11, 0.19],</b><br><b>P<sub>MD</sub>=0.61</b><br><b>I<sup>2</sup>=52.55%, P<sub>Q</sub>=0.006</b>  | <b>0.042 [-0.107, 0.192],</b><br><b>P<sub>MD</sub>=0.58</b><br><b>I<sup>2</sup>=51.51%, P<sub>Q</sub>=0.007</b> | <b>0.033 [-0.12, 0.185],</b><br><b>P<sub>MD</sub>=0.67</b><br><b>I<sup>2</sup>=55.32%, P<sub>Q</sub>=0.003</b> |
| SSB (0/2)                                    | -0.028 [-0.18, 0.13] ,<br>P <sub>MD</sub> =0.72<br>I <sup>2</sup> =45.68%, P <sub>Q</sub> =0.175              | NA                                                                                                              | NA                                                                                                             |
| Fruit (1/3)*                                 | -0.15 [-0.39, 0.08] ,<br>P <sub>MD</sub> =0.206<br>I <sup>2</sup> =0.00%, P <sub>Q</sub> =0.455               | NA                                                                                                              | NA                                                                                                             |
| Dried Fruit (1/5)*                           | 0.03 [-0.49, 0.55] ,<br>P <sub>MD</sub> =0.920<br>I <sup>2</sup> =65.5%, P <sub>Q</sub> =0.021                | NA                                                                                                              | NA                                                                                                             |
| Mixed fruit forms (0/1)                      | 0.20 [-0.34, 0.74] ,<br>P <sub>MD</sub> =0.467                                                                | NA                                                                                                              | NA                                                                                                             |



|                                           |                                                                                                                 |                                                                                                                  |                                                                                                                 |
|-------------------------------------------|-----------------------------------------------------------------------------------------------------------------|------------------------------------------------------------------------------------------------------------------|-----------------------------------------------------------------------------------------------------------------|
|                                           | $I^2 = .\%, P_Q = .$                                                                                            |                                                                                                                  |                                                                                                                 |
| Mixed sources (with SBBs) (2/4)           | 0.35 [-0.69, 1.39] ,<br>$P_{MD}=0.51$<br>$I^2=69.16\%, P_Q=0.02$                                                | 0.382 [-0.66, 1.42] ,<br>$P_{MD}=0.47$<br>$I^2=61.63\%, P_Q=0.05$                                                | 0.32 [-0.7, 1.33] ,<br>$P_{MD}=0.54$<br>$I^2=77.59\%, P_Q=0.004$                                                |
| Mixed sources (without SBBs) (1/2)*       | 0.15 [-0.01, 0.32] ,<br>$P_{MD}=0.059$<br>$I^2=0.00\%, P_Q=0.83$                                                | NA                                                                                                               | NA                                                                                                              |
| <b>Addition (5/16)</b>                    | <b>-0.48 [-0.99, 0.04],</b><br><b><math>P_{MD}=0.069</math></b><br><b><math>I^2=89.6\%, P_Q&lt;0.001</math></b> | <b>-0.47 [-0.90, -0.03],</b><br><b><math>P_{MD}=0.04</math></b><br><b><math>I^2=83.38\%, P_Q&lt;0.001</math></b> | <b>-0.46 [-1.10, 0.18],</b><br><b><math>P_{MD}=0.16</math></b><br><b><math>I^2=94.76\%, P_Q&lt;0.001</math></b> |
| SSB (0/3)                                 | 0.79 [-1.23, 2.80] ,<br>$P_{MD}=0.444$<br>$I^2=58.6\%, P_Q=0.089$                                               | NA                                                                                                               | NA                                                                                                              |
| Sweetened dairy (0/2)                     | -0.10 [-0.30, 0.10] ,<br>$P_{MD}=0.336$<br>$I^2=0.00\%, P_Q=1.000$                                              | NA                                                                                                               | NA                                                                                                              |
| 100% Fruit juice (1/3)                    | -0.65 [-2.57, 1.27] ,<br>$P_{MD}=0.507$<br>$I^2=95.6\%, P_Q=0.000$                                              | -0.65 [-2.58, 1.27] ,<br>$P_{MD}=0.508$<br>$I^2=95.72\%, P_Q=0.000$                                              | -0.66 [-2.73, 1.41] ,<br>$P_{MD}=0.532$<br>$I^2=97.45\%, P_Q=0.000$                                             |
| Fruit (2/3)*                              | -0.89 [-1.58, -0.20] ,<br>$P_{MD}=0.012$<br>$I^2=14.3\%, P_Q=0.311$                                             | NA                                                                                                               | NA                                                                                                              |
| Sweets and desserts (1/2)                 | -4.66 [-16.21, 6.90] ,<br>$P_{MD}=0.43$<br>$I^2=77.3\%, P_Q=0.040$                                              | -4.68 [-16.24, 6.88] ,<br>$P_{MD}=0.43$<br>$I^2=76.94\%, P_Q=0.04$                                               | -4.63 [-16.18, 6.91] ,<br>$P_{MD}=0.43$<br>$I^2=77.71\%, P_Q=0.03$                                              |
| Added nutritive (caloric) sweetener (0/3) | -0.91 [-2.18, 0.36] ,<br>$P_{MD}=0.162$<br>$I^2= 2.00\%, P_Q=0.361$                                             | NA                                                                                                               | NA                                                                                                              |
| <b>IL-6 (pg/mL)</b>                       |                                                                                                                 |                                                                                                                  |                                                                                                                 |
| <b>Substitution (6/16)</b>                | <b>-0.043 [-0.24, 0.15],</b><br><b><math>P_{MD}=0.663</math></b><br><b><math>I^2=22.17\%, P_Q=0.202</math></b>  | <b>-0.035 [-0.23, 0.16],</b><br><b><math>P_{MD}=0.726</math></b><br><b><math>I^2=22.49\%, P_Q=0.198</math></b>   | <b>-0.04 [-0.215, 0.13],</b><br><b><math>P_{MD}=0.64</math></b><br><b><math>I^2=23.64\%, P_Q=0.19</math></b>    |
| SSB (2/5)                                 | -0.096 [-0.49, 0.3] ,<br>$P_{MD}=0.634$<br>$I^2=0.0\%, P_Q=0.798$                                               | -0.1 [-0.575, 0.375] ,<br>$P_{MD}=0.68$<br>$I^2=0.0\%, P_Q=0.8$                                                  | -0.09 [-0.375, 0.19] ,<br>$P_{MD}=0.53$<br>$I^2=0.0\%, P_Q=0.8$                                                 |
| Fruit (1/4)*                              | 0.16 [-0.83, 1.16] ,<br>$P_{MD}=0.748$<br>$I^2=46.1\%, P_Q=0.135$                                               | NA                                                                                                               | NA                                                                                                              |
| Dried fruit (1/3)*                        | 0.30 [-0.73, 1.34] ,<br>$P_{MD}=0.566$<br>$I^2=71.9\%, P_Q=0.028$                                               | NA                                                                                                               | NA                                                                                                              |
| Mixed (with SBBs) (0/1)                   | 0.02 [-0.301, 0.34] ,<br>$P_{MD}=0.903$<br>$I^2 = .\%, P_Q = .$                                                 | NA                                                                                                               | NA                                                                                                              |
| Mixed (without SBBs) (2/3)                | 0.18 [-0.201, 0.57] ,<br>$P_{MD}=0.35$<br>$I^2=0.0\%, P_Q=0.66$                                                 | 0.17 [-0.19, 0.525] ,<br>$P_{MD}=0.35$<br>$I^2=0.0\%, P_Q=0.66$                                                  | 0.15 [-0.16, 0.47] ,<br>$P_{MD}=0.346$<br>$I^2=0.0\%, P_Q=0.646$                                                |
| <b>Addition (1/16)*</b>                   | <b>-0.15 [-0.45, 0.16],</b><br><b><math>P_{MD}=0.352</math></b><br><b><math>I^2=82.90\%, P_Q=0.000</math></b>   | NA                                                                                                               | NA                                                                                                              |
| SSB (0/5)                                 | 0.06 [-0.34, 0.46] ,<br>$P_{MD}=0.776$                                                                          | NA                                                                                                               | NA                                                                                                              |

|                                           |                                                                                                     |    |    |
|-------------------------------------------|-----------------------------------------------------------------------------------------------------|----|----|
|                                           | $I^2=29.0\%$ , $P_Q=0.229$<br>-0.52 [-1.12, 0.08] ,<br>$P_{MD}=0.087$<br>$I^2=46.6\%$ , $P_Q=0.171$ |    |    |
| Sweetened dairy (0/2)                     |                                                                                                     | NA | NA |
| 100% Fruit juice (0/4)                    | -3.014 [-6.91, 0.88] ,<br>$P_{MD}=0.13$<br>$I^2=74.08\%$ , $P_Q=0.009$                              | NA | NA |
| Fruit (1/3)*                              | -0.19 [-0.59, 0.21] ,<br>$P_{MD}=0.352$<br>$I^2=86.5\%$ , $P_Q=0.001$                               | NA | NA |
| Sweets and desserts (0/1)                 | -8.79 [-14.26, -3.32] ,<br>$P_{MD}=0.002$<br>$I^2=.$ %, $P_Q=.$                                     | NA | NA |
| Added nutritive (caloric) sweetener (0/1) | 0.40 [-0.22, 1.02] ,<br>$P_{MD}=0.207$<br>$I^2=.$ %, $P_Q=.$                                        | NA | NA |

CRP=C reactive protein; IL-6=Interleukin-6; NA, not applicable; TNF- $\alpha$ = tumour necrosis factor-alpha; SSB=sugar sweetened beverages

\*For one or more crossover trial a correlation coefficient was not used since a p-value was provided for the mean difference between treatment changes.

**Supplemental Table S7: GRADE certainty of evidence assessment\* for the effect of fructose-containing sugars on biomarkers of inflammation by energy control**

| Outcome and trial (N) |                                      | GRADE assessment   |                          |                           |                       |                    |                   | Effect (MD [95% CI], P <sub>MD</sub> ) | Certainty of Evidence <sup>a</sup> | Interpretation of magnitude of effect <sup>b</sup> |           |
|-----------------------|--------------------------------------|--------------------|--------------------------|---------------------------|-----------------------|--------------------|-------------------|----------------------------------------|------------------------------------|----------------------------------------------------|-----------|
|                       |                                      | Downgrades         |                          |                           |                       |                    | Upgrades          |                                        |                                    |                                                    |           |
|                       |                                      | Risk of bias (ROB) | Inconsistency            | Indirectness              | Imprecision           | Publication bias   | Dose response     |                                        |                                    |                                                    |           |
| CRP (mg/L)            |                                      |                    |                          |                           |                       |                    |                   |                                        |                                    |                                                    |           |
| Substitution (37)     | Randomized and non-randomized trials | Not serious        | Not serious <sup>1</sup> | Very serious <sup>2</sup> | Not serious           | None               | None              | ↔                                      | 0.07 [-0.08 to 0.22], P=0.336      | ⊕⊕○○ Low                                           | No effect |
| Addition (37)         | Randomized and non-randomized trials | Not serious        | Not serious              | Very serious <sup>3</sup> | Not serious           | None               | None              | ↓                                      | -0.18 [-0.33 to -0.03], P=0.020    | ⊕⊕○○ Low                                           | Trivial   |
| Subtraction (4)       | Randomized trials                    | Not serious        | Not serious              | Very serious <sup>4</sup> | Serious <sup>5</sup>  | None <sup>6</sup>  | None <sup>7</sup> | ↔                                      | 0.14 [-0.29 to 0.56], P=0.522      | ⊕○○○ Very low                                      | No effect |
| <i>Ad libitum</i> (3) | Randomized trials                    | Not serious        | Not serious              | Very serious <sup>4</sup> | Not serious           | None <sup>6</sup>  | None <sup>7</sup> | ↔                                      | -0.09 [-0.44 to 0.25], P=0.604     | ⊕⊕○○ Low                                           | No effect |
| TNF-α (pg/mL)         |                                      |                    |                          |                           |                       |                    |                   |                                        |                                    |                                                    |           |
| Substitution (17)     | Randomized and non-randomized trials | Not serious        | Not serious <sup>8</sup> | Not serious               | Not serious           | None               | None              | ↔                                      | 0.04 [-0.11 to 0.19], P=0.610      | ⊕⊕⊕⊕ High                                          | No effect |
| Addition (16)         | Randomized and non-randomized trials | Not serious        | Not serious <sup>9</sup> | Very serious <sup>3</sup> | Serious <sup>10</sup> | None               | None              | ↔                                      | -0.48 [-0.99 to 0.04], P=0.069     | ⊕○○○ Very low                                      | No effect |
| IL-6 (pg/mL)          |                                      |                    |                          |                           |                       |                    |                   |                                        |                                    |                                                    |           |
| Substitution (16)     | Randomized and non-randomized trials | Not serious        | Not serious              | Not serious               | Serious <sup>11</sup> | None <sup>12</sup> | None              | ↔                                      | -0.04 [-0.24 to 0.15], P=0.663     | ⊕⊕⊕○ Moderate                                      | No effect |
| Addition (16)         | Randomized and non-randomized trials | Not serious        | Serious <sup>13</sup>    | Very serious <sup>2</sup> | Serious <sup>11</sup> | None <sup>14</sup> | None              | ↔                                      | -0.15 [-0.45 to 0.16], P=0.352     | ⊕○○○ Very low                                      | No effect |

<sup>a</sup> Since all included trials were randomized or non-randomized controlled trials, the certainty of the evidence was graded as high for all outcomes by default and then downgraded or upgraded based on pre-specified criteria. Criteria for downgrades included risk of bias (ROB) (downgraded if the majority of trials were considered to be at high ROB); inconsistency (downgraded if there was substantial

unexplained heterogeneity [ $I^2 \geq 50\%$ ,  $P_Q < 0.10$ ]; indirectness (downgraded if there were factors absent or present relating to the participants, interventions, or outcomes that limited the generalizability of the results); imprecision (downgraded if the 95% confidence interval crossed the minimally important difference [MID] for harm or benefit set at 0.5 mg/L for CRP (Reynolds Risk Score. Available at: <http://www.reynoldsriskscore.org/Default.aspx> [Accessed March 14, 2018]; Ridker, P.M. et al., 2008. *Circulation*, 118(22), pp.2243–51; Ridker, P.M. et al., 2007. *JAMA* 297(6), pp.611–619.), 0.28 pg/mL for TNF- $\alpha$  (Mayoclinic. Tumour Necrosis Factor (TNF), Plasma. Available from: <https://www.mayocliniclabs.com/test-catalog/Clinical+and+Interpretive/63022>), 0.18 pg/mL for IL-6 (Mayoclinic. Interleukin 6, Plasma. Available from: <https://www.mayocliniclabs.com/test-catalog/Clinical+and+Interpretive/63020>); and publication bias (downgraded if there is evidence of publication bias based on funnel plot asymmetry and/or significant Egger's or Begg's tests ( $P < 0.10$ ) with confirmation by adjustment by Duval and Tweedie trim-and-fill analysis). Criteria for upgrades included a significant dose-response gradient.

<sup>b</sup> For the interpretation of the magnitude, we used the MIDs (see a above) to assess the importance of magnitude of our pooled estimates using the effect size categories according to new GRADE guidance. We then used the MIDs to assess the importance of the magnitude of our point estimates using the effect size categories according GRADE guidance (Santesso et al. 2020, Schunemann et al. 2013, Balshem et al. 2011) as follows: large effect ( $\geq 5 \times$  MID); moderate effect ( $\geq 2 \times$  MID); small important effect ( $\geq 1 \times$  MID); and trivial/unimportant effect ( $< 1$  MID).

CI, confidence interval; CRP, C-reactive protein; IL-6, interleukin-6; MD, mean difference; MID, minimally important difference; TNF- $\alpha$ , tumour necrosis factor-alpha; ROB, risk of bias

<sup>1</sup>No downgrade for serious inconsistency. The evidence for substantial heterogeneity was driven by food source ( $P=0.010$  for interaction) for which a double downgrade was already made. The significant interaction of food source also altered the evidence for substantial heterogeneity to non-substantial heterogeneity (Original:  $I^2=53.7\%$ ,  $P_Q<0.001$ ; residual  $I^2=44.4\%$ ,  $P_Q=0.01$ ).

<sup>2</sup> Double downgrade for very serious indirectness as there was a significant interaction by food source ( $P<0.1$ ) indicating that there is biological plausibility of differences in behaviour of foods due to the food matrices.

<sup>3</sup> Double downgrade for very serious indirectness for the effect of total fructose-containing sugars on CRP in addition trials as the effect is driven by one food source (fruit). We double downgraded for very serious indirectness for addition trials of TNF- $\alpha$  as well due to the similar significant effect of fruit.

<sup>4</sup> Double downgrade for very serious indirectness as there was only one food source available for analyses, thus limiting the ability to assess differences in food sources.

<sup>5</sup> Downgrade for serious imprecision as the 95% confidence interval overlaps the MID of clinically important harm for CRP (0.5mg/L).

<sup>6</sup> No downgrade for publication bias, as publication bias could not be assessed due to lack of power for assessing funnel plot asymmetry and small study effects ( $<10$  trial comparisons included in the meta-analysis).

<sup>7</sup> No upgrade for dose-response, as dose-response could not be assessed as <6 trials were available.

<sup>8</sup> Although there was substantial heterogeneity in the analysis of the effect of total fructose containing sugars on TNF-  $\alpha$  in substitution trials, we did not downgrade for serious inconsistency, since it was partially explained when the study by Kaliora et al. 2016 or Van Meijl et al. 2011 was removed as part of a priori sensitivity analyses (Original:  $I^2=53\%$ ,  $P_Q=0.006$ ; after Kaliora et al. 2016 removed:  $I^2=42\%$ ,  $P_Q=0.038$ ; after Van Meijl et al. 2011 removed:  $I^2=49\%$ ,  $P_Q=0.014$ ).

<sup>9</sup> Although there was substantial heterogeneity in the analysis of the effect of total fructose containing sugars on TNF-  $\alpha$  in addition trials, we did not downgrade for serious inconsistency, since it was partially explained when the study by Leelarungrayub et al. 2016 was removed as part of a priori sensitivity analyses (Original:  $I^2=87\%$ ,  $P_Q<0.001$ ; after removal:  $I^2=49\%$ ,  $P_Q=0.017$ ).

<sup>10</sup> Downgrade for serious imprecision as the 95% confidence interval overlaps the MID of clinically important benefit for TNF-  $\alpha$  (0.28pg/mL). There was also a gain of significance in sensitivity analyses with the removal of Karlsen et al. 2010 (recalculated MD: -0.61pg/mL; 95% CI: -1.15 to -0.08;  $P_{MD}=0.027$ ) or Sanchez-Delgado et al. 2021 (ST) (recalculated MD: -0.57pg/mL; 95% CI: -1.09 to -0.05;  $P_{MD}=0.030$ ) and with the use of a correlation coefficient of 0.25 (recalculated MD: -0.47pg/mL; 95% CI: -0.90 to -0.03;  $P_{MD}=0.04$ ).

<sup>11</sup> Downgrade for serious imprecision as the 95% confidence interval overlaps the MID of clinically important benefit for IL-6 (0.18pg/mL).

<sup>12</sup> Although a significant publication bias was detected at  $P=0.004$  in Egger's test, we did not downgrade for publication bias as the imputation of 4 trials from trim-and-fill analyses did not change the significance, magnitude or direction of the overall effect (Original MD: -0.04pg/mL; 95% CI: -0.24 to 0.15,  $P=0.664$ ; imputed MD: -0.05pg/mL; 95% CI: -0.28 to 0.18,  $P=0.677$ ).

<sup>13</sup> Downgrade for serious inconsistency, due to substantial unexplained heterogeneity  $I^2=83\%$ ,  $P_Q<0.001$ .

<sup>14</sup> Although a significant publication bias was detected at  $P=0.015$  in Egger's test, we did not downgrade for publication bias as the imputation of 4 trials from trim-and-fill analyses did not change the significance, magnitude or direction of the overall effect (Original MD: -0.15pg/mL; 95% CI: -0.45 to 0.16,  $P=0.349$ ; imputed MD: -0.06pg/mL; 95% CI: -0.39 to 0.27,  $P=0.718$ ).

**Supplemental Table S8: GRADE certainty of evidence assessment\* for the effect of fructose-containing sugars on biomarkers of inflammation by important food source of fructose-containing sugars**

| Outcome and trial (N)                   | Design                               | GRADE assessment         |                          |                      |                      |                   |                   | Effect (MD [95%CI], P <sub>MD</sub> ) | Certainty of Evidence <sup>a</sup> | Interpretation of magnitude of effect <sup>b</sup> |                 |
|-----------------------------------------|--------------------------------------|--------------------------|--------------------------|----------------------|----------------------|-------------------|-------------------|---------------------------------------|------------------------------------|----------------------------------------------------|-----------------|
|                                         |                                      | Downgrades               |                          |                      |                      |                   | Upgrades          |                                       |                                    |                                                    |                 |
|                                         |                                      | Risk of bias             | Inconsistency            | Indirectness         | Imprecision          | Publication bias  | Dose response     |                                       |                                    |                                                    |                 |
| CRP in substitution trials (mg/L)       |                                      |                          |                          |                      |                      |                   |                   |                                       |                                    |                                                    |                 |
| SSB (10)                                | Randomized and non-randomized trials | Not serious              | Not serious              | Not serious          | Not serious          | None              | None              | ↔                                     | 0.07 [-0.16 to 0.30], P=0.543      | ⊕⊕⊕⊕ High                                          | No effect       |
| Sweetened dairy (3)                     | Randomized trials                    | Not serious              | Not serious              | Serious <sup>1</sup> | Serious <sup>2</sup> | None <sup>3</sup> | None <sup>4</sup> | ↔                                     | -0.06 [-0.51 to 0.39], P=0.802     | ⊕⊕○○ Low                                           | No effect       |
| Sweetened dairy alternative (soy) (1)   | Randomized trial                     | Not serious              | Not serious              | Serious <sup>1</sup> | Serious <sup>2</sup> | None <sup>3</sup> | None <sup>4</sup> | ↓                                     | -0.96 [-1.67 to -0.25], P=0.008    | ⊕⊕○○ Low                                           | Small important |
| 100% Fruit juice (2)                    | Randomized trials                    | Not serious              | Not serious              | Serious <sup>1</sup> | Serious <sup>2</sup> | None <sup>3</sup> | None <sup>4</sup> | ↓                                     | -1.09 [-2.01 to -0.17], P=0.021    | ⊕⊕○○ Low                                           | Moderate        |
| Fruit (5)                               | Randomized trials                    | Not serious              | Not serious              | Not serious          | Serious <sup>2</sup> | None <sup>3</sup> | None <sup>4</sup> | ↔                                     | -0.43 [-0.87 to 0.01], P=0.055     | ⊕⊕⊕○ Moderate                                      | No effect       |
| Dried fruit (4)                         | Randomized trials                    | Not serious              | Not serious              | Not serious          | Serious <sup>2</sup> | None <sup>3</sup> | None <sup>4</sup> | ↔                                     | 0.21 [-0.14 to 0.55], P=0.240      | ⊕⊕⊕○ Moderate                                      | No effect       |
| Mixed fruit forms (1)                   | Randomized trial                     | Not serious              | Not serious              | Serious <sup>1</sup> | Serious <sup>2</sup> | None <sup>3</sup> | None <sup>4</sup> | ↔                                     | -0.10 [-1.20 to 1.00], P=0.859     | ⊕⊕○○ Low                                           | No effect       |
| Added nutritive (caloric) sweetener (1) | Randomized trial                     | Not serious              | Not serious              | Serious <sup>1</sup> | Not serious          | None <sup>3</sup> | None <sup>4</sup> | ↔                                     | -0.03 [-0.11 to 0.05], P=0.464     | ⊕⊕⊕○ Moderate                                      | No effect       |
| Mixed sources (with SSBs) (6)           | Randomized and non-randomized trials | Not serious <sup>5</sup> | Not serious <sup>6</sup> | Not serious          | Serious <sup>2</sup> | None <sup>3</sup> | None <sup>4</sup> | ↑                                     | 0.64 [0.12 to 1.17], P=0.016       | ⊕⊕⊕○ Moderate                                      | Small important |
| Mixed sources (without SSBs) (4)        | Randomized trials                    | Not serious              | Not serious              | Not serious          | Serious <sup>2</sup> | None <sup>3</sup> | None <sup>4</sup> | ↔                                     | 0.28 [-0.21 to 0.78], P=0.260      | ⊕⊕⊕○ Moderate                                      | No effect       |
| CRP in addition trials (mg/L)           |                                      |                          |                          |                      |                      |                   |                   |                                       |                                    |                                                    |                 |
| SSB (7)                                 | Randomized and non-                  | Not serious              | Not serious              | Not serious          | Not serious          | None <sup>3</sup> | None              | ↔                                     | 0.02 [-0.15 to 0.19], P=0.790      | ⊕⊕⊕⊕ High                                          | No effect       |

|                                         |                                      |                      |                          |                      |                      |                   |                   |   |                                 |               |                 |  |
|-----------------------------------------|--------------------------------------|----------------------|--------------------------|----------------------|----------------------|-------------------|-------------------|---|---------------------------------|---------------|-----------------|--|
|                                         | randomized trials                    |                      |                          |                      |                      |                   |                   |   |                                 |               |                 |  |
| Sweetened dairy alternative (soy) (2)   | Randomized trials                    | Not serious          | Not serious              | Serious <sup>1</sup> | Serious <sup>2</sup> | None <sup>3</sup> | None <sup>4</sup> | ↔ | 0.20 [-0.78 to 1.18], P=0.689   | ⊕⊕○○ Low      | No effect       |  |
| 100% Fruit juice (12)                   | Randomized and non-randomized trials | Not serious          | Not serious              | Not serious          | Serious <sup>2</sup> | None <sup>3</sup> | None              | ↔ | -0.12 [-0.53 to 0.30], P=0.580  | ⊕⊕⊕○ Moderate | No effect       |  |
| Fruit (9)                               | Randomized and non-randomized trials | Not serious          | Not serious              | Not serious          | Serious <sup>2</sup> | None <sup>3</sup> | None              | ↓ | -0.50 [-0.75 to -0.25], P<0.001 | ⊕⊕⊕○ Moderate | Small important |  |
| Dried fruit (3)                         | Randomized trials                    | Not serious          | Not serious              | Serious <sup>1</sup> | Serious <sup>2</sup> | None <sup>3</sup> | None <sup>4</sup> | ↔ | 0.02 [-0.75 to 0.79], P=0.962   | ⊕⊕○○ Low      | No effect       |  |
| Sweetened cereal grains and bars (1)    | Non-randomized trial                 | Serious <sup>7</sup> | Not serious              | Serious <sup>1</sup> | Serious <sup>2</sup> | None <sup>3</sup> | None <sup>4</sup> | ↔ | -0.30 [-0.79 to 0.19], P=0.228  | ⊕○○○ Very low | No effect       |  |
| Sweets and desserts (2)                 | Randomized trials                    | Not serious          | Serious <sup>8</sup>     | Serious <sup>1</sup> | Serious <sup>2</sup> | None <sup>3</sup> | None <sup>4</sup> | ↔ | -0.67 [-1.85 to 0.50], P=0.260  | ⊕○○○ Very low | No effect       |  |
| Added nutritive (caloric) sweetener (1) | Randomized trial                     | Not serious          | Not serious              | Serious <sup>1</sup> | Serious <sup>2</sup> | None <sup>3</sup> | None <sup>4</sup> | ↔ | 0.56 [-4.19 to 5.31], P=0.817   | ⊕⊕○○ Low      | No effect       |  |
| CRP in subtraction trials (mg/L)        |                                      |                      |                          |                      |                      |                   |                   |   |                                 |               |                 |  |
| SSB (4)                                 | Randomized trials                    | Not serious          | Not serious              | Serious <sup>1</sup> | Serious <sup>2</sup> | None <sup>3</sup> | None <sup>4</sup> | ↔ | 0.14 [-0.29 to 0.56], P=0.522   | ⊕⊕○○ Low      | No effect       |  |
| CRP in <i>ad libitum</i> trials (mg/L)  |                                      |                      |                          |                      |                      |                   |                   |   |                                 |               |                 |  |
| Mixed sources (with SSBs) (3)           | Randomized trials                    | Not serious          | Not serious              | Serious <sup>1</sup> | Not serious          | None <sup>3</sup> | None <sup>4</sup> | ↔ | -0.09 [-0.44 to 0.25], P=0.604  | ⊕⊕⊕○ Moderate | No effect       |  |
| TNF-α in addition trials (pg/mL)        |                                      |                      |                          |                      |                      |                   |                   |   |                                 |               |                 |  |
| SSB (3)                                 | Randomized trials                    | Not serious          | Not serious <sup>9</sup> | Serious <sup>1</sup> | Serious <sup>2</sup> | None <sup>3</sup> | None <sup>4</sup> | ↔ | 0.79 [-1.23 to 2.80], P=0.444   | ⊕⊕○○ Low      | No effect       |  |
| Sweetened dairy (2)                     | Randomized trials                    | Not serious          | Not serious              | Serious <sup>1</sup> | Serious <sup>2</sup> | None <sup>3</sup> | None <sup>4</sup> | ↔ | -0.10 [-0.30 to 0.10], P=0.336  | ⊕⊕○○ Low      | No effect       |  |

|                                          |                                      |             |                           |                      |                      |                   |                   |   |                                  |               |                 |
|------------------------------------------|--------------------------------------|-------------|---------------------------|----------------------|----------------------|-------------------|-------------------|---|----------------------------------|---------------|-----------------|
| 100% Fruit juice (3)                     | Randomized and non-randomized trials | Not serious | Serious <sup>10</sup>     | Not serious          | Serious <sup>2</sup> | None <sup>3</sup> | None <sup>4</sup> | ↔ | -0.65 [-2.57 to 1.27], P=0.507   | ⊕⊕○○ Low      | No effect       |
| Fruit (3)                                | Randomized and non-randomized trials | Not serious | Not serious               | Not serious          | Serious <sup>2</sup> | None <sup>3</sup> | None <sup>4</sup> | ↓ | -0.89 [-1.58 to -0.20], P=0.012  | ⊕⊕⊕○ Moderate | Small important |
| Sweets and desserts (2)                  | Randomized trials                    | Not serious | Serious <sup>11</sup>     | Serious <sup>1</sup> | Serious <sup>2</sup> | None <sup>3</sup> | None <sup>4</sup> | ↔ | -4.66 [-16.21 to 6.90], P=0.429  | ⊕○○○ Very low | No effect       |
| Added nutritive (caloric) sweetener (3)  | Randomized trials                    | Not serious | Not serious               | Serious <sup>1</sup> | Serious <sup>2</sup> | None <sup>3</sup> | None <sup>4</sup> | ↔ | -0.91 [-2.18 to 0.36], P=0.162   | ⊕⊕○○ Low      | No effect       |
| <b>IL-6 in addition trials (pg/mL)</b>   |                                      |             |                           |                      |                      |                   |                   |   |                                  |               |                 |
| SSB (5)                                  | Randomized trials                    | Not serious | Not serious               | Not serious          | Serious <sup>2</sup> | None <sup>3</sup> | None <sup>4</sup> | ↔ | 0.06 [-0.34 to 0.46], P=0.776    | ⊕⊕⊕○ Moderate | No effect       |
| Sweetened dairy (2)                      | Randomized trials                    | Not serious | Not serious               | Serious <sup>1</sup> | Serious <sup>2</sup> | None <sup>3</sup> | None <sup>4</sup> | ↔ | -0.52 [-1.12 to 0.08], P=0.087   | ⊕⊕○○ Low      | No effect       |
| 100% Fruit juice (4)                     | Randomized and non-randomized trials | Not serious | Not serious <sup>12</sup> | Not serious          | Serious <sup>2</sup> | None <sup>3</sup> | None <sup>4</sup> | ↔ | -3.01 [-6.91 to 0.88], P=0.130   | ⊕⊕⊕○ Moderate | No effect       |
| Fruit (3)                                | Randomized and non-randomized trials | Not serious | Serious <sup>13</sup>     | Not serious          | Serious <sup>2</sup> | None <sup>3</sup> | None <sup>4</sup> | ↔ | -0.19 [-0.59 to 0.21], P=0.352   | ⊕⊕○○ Low      | No effect       |
| Sweets and desserts (dark chocolate) (1) | Randomized trial                     | Not serious | Not serious               | Serious <sup>1</sup> | Not serious          | None <sup>3</sup> | None <sup>4</sup> | ↓ | -8.79 [-14.26 to -3.32], P=0.002 | ⊕⊕⊕○ Moderate | Large           |
| Added nutritive (caloric) sweetener (1)  | Randomized trial                     | Not serious | Not serious               | Serious <sup>1</sup> | Serious <sup>2</sup> | None <sup>3</sup> | None <sup>4</sup> | ↔ | 0.40 [-0.22 to 1.02], P=0.207    | ⊕⊕○○ Low      | No effect       |

<sup>a</sup> Since all included trials were randomized or non-randomized controlled trials, the certainty of the evidence was graded as high for all outcomes by default and then downgraded or upgraded based on pre-specified criteria. Criteria for downgrades included risk of bias (ROB) (downgraded if the majority of trials were considered to be at high ROB); inconsistency (downgraded if there was substantial unexplained heterogeneity [ $I^2 \geq 50\%$ ,  $P_Q < 0.10$ ]; indirectness (downgraded if there were factors absent or present relating to the participants, interventions, or outcomes that limited the generalizability of the results); imprecision (downgraded if the 95% confidence interval crossed the minimally important difference [MID] for harm or benefit set at 0.5 mg/L for CRP (Reynolds Risk Score. Available at: <http://www.reynoldsriskscore.org/Default.aspx> [Accessed March 14, 2018]; Ridker, P.M. et al., 2008. Circulation,



118(22), pp.2243–51; Ridker, P.M. et al., 2007. JAMA 297(6), pp.611–619.), 0.28 pg/mL for TNF- $\alpha$  (Mayoclinic. Tumour Necrosis Factor (TNF), Plasma. Available from: <https://www.mayocliniclabs.com/test-catalog/Clinical+and+Interpretive/63022>), 0.18 pg/mL for IL-6 (Mayoclinic. Interleukin 6, Plasma. Available from: <https://www.mayocliniclabs.com/test-catalog/Clinical+and+Interpretive/63020>); and publication bias (downgraded if there is evidence of publication bias based on funnel plot asymmetry and/or significant Egger's or Begg's tests ( $P < 0.10$ ) with confirmation by adjustment by Duval and Tweedie trim-and-fill analysis). Criteria for upgrades included a significant dose-response gradient.

<sup>b</sup> For the interpretation of the magnitude, we used the MIDs (see a above) to assess the importance of magnitude of our pooled estimates using the effect size categories according to new GRADE guidance. We then used the MIDs to assess the importance of the magnitude of our point estimates using the effect size categories according GRADE guidance (Santesso et al. 2020, Schunemann et al. 2013, Balshem et al. 2011) as follows: large effect ( $\geq 5 \times$  MID); moderate effect ( $\geq 2 \times$  MID); small important effect ( $\geq 1 \times$  MID); and trivial/unimportant effect ( $< 1$  MID).

CI, confidence interval; CRP, C-reactive protein; IL-6, interleukin-6; MD, mean difference; MID, minimally important difference; TNF- $\alpha$ , tumour necrosis factor-alpha; ROB, risk of bias

<sup>1</sup> Downgrade for serious indirectness as all trial comparisons come from one or two studies, which leads to lack of reproducibility and poor applicability of the results to the general adult population.

<sup>2</sup> Downgrade for serious imprecision as the 95% confidence interval overlaps the MID of clinically important harm and/or benefit for CRP (0.5mg/L), TNF- $\alpha$  (0.28pg/mL) or IL-6 (0.18pg/mL). Further, in sensitivity analyses, the removal of the following individual trials resulted in a loss of significance: Jalilvand et al. 2020 or Khodami et al. 2022 for mixed sources with SSBs on CRP in substitution trials; Ribeiro et al. 2017 for 100% fruit juice on CRP in substitution trials; gain of significance in sensitivity analyses with the removal of Lehtonen et al. 2011 for fruit on CRP in substitution trials; Alavinejad et al. 2015 for sweets and desserts on CRP in addition trials; Ellis et al. 2011 (SB) for sweetened dairy on IL-6 in addition trials; Simao et al. 2013 for 100% fruit juice on IL-6 in addition trials; and with the use of a correlation coefficient of 0.75 for crossover trials for fruit on CRP in substitution trials (recalculated MD: -0.43mg/L; 95% CI: -0.85 to -0.01;  $P_{MD}=0.045$ ).

<sup>3</sup> No downgrade for publication bias, as publication bias could not be assessed due to lack of power for assessing funnel plot asymmetry and small study effects ( $< 10$  trial comparisons included in the meta-analysis).

<sup>4</sup> No upgrade for dose-response, as dose-response could not be assessed as  $< 6$  trials were available with dose data.

<sup>5</sup> No downgrade for serious risk of bias since although half of trial comparisons (3 out of 6) were at high risk of bias for sequence generation and allocation concealment, there was no effect in sensitivity analyses between the effect of each set of 3 trials.

<sup>6</sup> Although there was substantial heterogeneity in the analysis of the effect of mixed sources with SSBs on CRP in substitution trials, we did not downgrade for serious inconsistency, since it was partially explained when the study by Souto et al. 2013 was removed as part of a priori sensitivity analyses (Original:  $I^2=83\%$ ,  $P_Q < 0.001$ ; after removal:  $I^2=0\%$ ,  $P_Q=0.865$ ).

<sup>7</sup> Downgrade for serious risk of bias since the one trial was non-randomized study and thus sequence generation and allocation concealment were high risk of bias.

<sup>8</sup> Downgrade for serious inconsistency, due to substantial unexplained heterogeneity  $I^2=87\%$ ,  $P_Q=0.006$ .

<sup>9</sup> Although there was substantial heterogeneity in the analysis of the effect of SSB on TNF- $\alpha$  in addition trials, we did not downgrade for serious inconsistency, since it was partially explained when the study by Sanchez-Delgado et al. 2021 (ST) was removed as part of a priori sensitivity analyses (Original:  $I_2=59\%$ ,  $P_Q=0.089$ ; after study removed:  $I_2=0\%$ ,  $P_Q=0.979$ ).

<sup>10</sup> Downgrade for serious inconsistency, due to substantial unexplained heterogeneity  $I^2=96\%$ ,  $P_Q<0.001$ .

<sup>11</sup> Downgrade for serious inconsistency, due to substantial unexplained heterogeneity  $I^2=77\%$ ,  $P_Q=0.04$ .

<sup>12</sup> Although there was substantial heterogeneity in the analysis of the effect of 100% fruit juice on IL-6 in addition trials, we did not downgrade for serious inconsistency, since it was partially explained when the study by Simao et al. 2013 was removed as part of a priori sensitivity analyses (Original:  $I^2=74\%$ ,  $P_Q=0.009$ ; after removal:  $I^2=46\%$ ,  $P_Q=0.160$ ).

<sup>13</sup> Downgrade for serious inconsistency, due to substantial unexplained heterogeneity  $I^2=86\%$ ,  $P_Q<0.001$ .

## Supplemental Figures

**Supplemental Figure S1: Risk of bias proportion graph for the effect of important food sources of fructose-containing sugars on CRP (mg/L) in substitution trials**

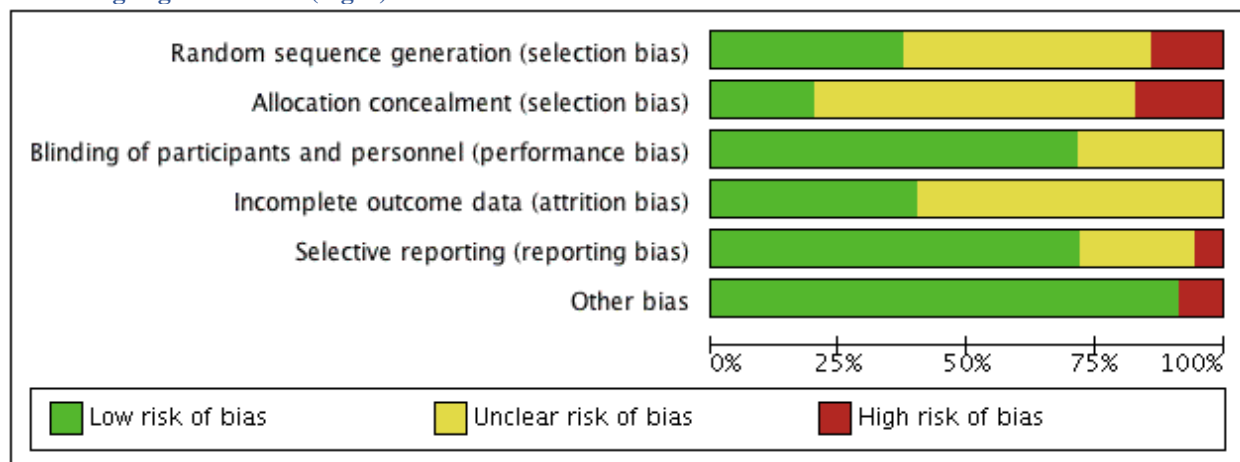

Colored bars represent the proportion of trials assessed as low (green), unclear (yellow) or high (red) risk of bias for the six domains of bias above according to criteria set by the Cochrane Risk of Bias tool in the 35 included controlled trial comparisons.

High other risk of bias (carry-over effect) was given to crossover trials which had no washout between interventions. Trials which did not have this characteristic were rated as Low.

**Supplemental Figure S2: Risk of bias proportion graph for the effect of important food sources of fructose-containing sugars on CRP (mg/L) in addition trials**

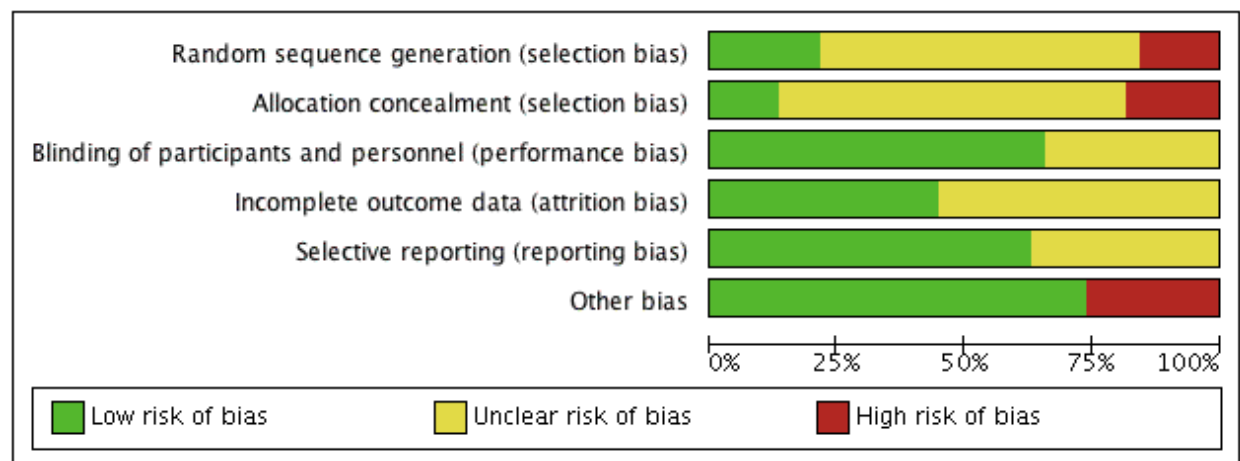

Colored bars represent the proportion of trials assessed as low (green), unclear (yellow) or high (red) risk of bias for the six domains of bias above according to criteria set by the Cochrane Risk of Bias tool in the 38 included controlled trial comparisons.

High other risk of bias (carry-over effect) was given to crossover trials which had no washout between interventions. Trials which did not have this characteristic were rated as Low.

**Supplemental Figure S3: Risk of bias proportion graph for the effect of important food sources of fructose-containing sugars on CRP (mg/L) in subtraction trials**

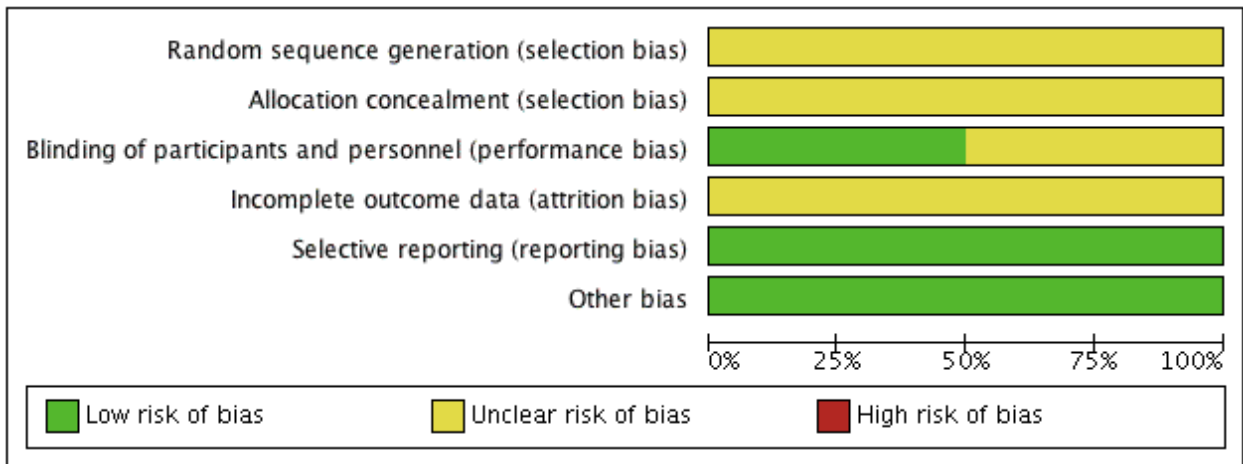

Colored bars represent the proportion of trials assessed as low (green), unclear (yellow) or high (red) risk of bias for the six domains of bias above according to criteria set by the Cochrane Risk of Bias tool in the 4 included controlled trial comparisons.

High other risk of bias (carry-over effect) was given to crossover trials which had no washout between interventions. Trials which did not have this characteristic were rated as Low.

**Supplemental Figure S4: Risk of bias proportion graph for the effect of important food sources of fructose-containing sugars on CRP (mg/L) in ad libitum trials**

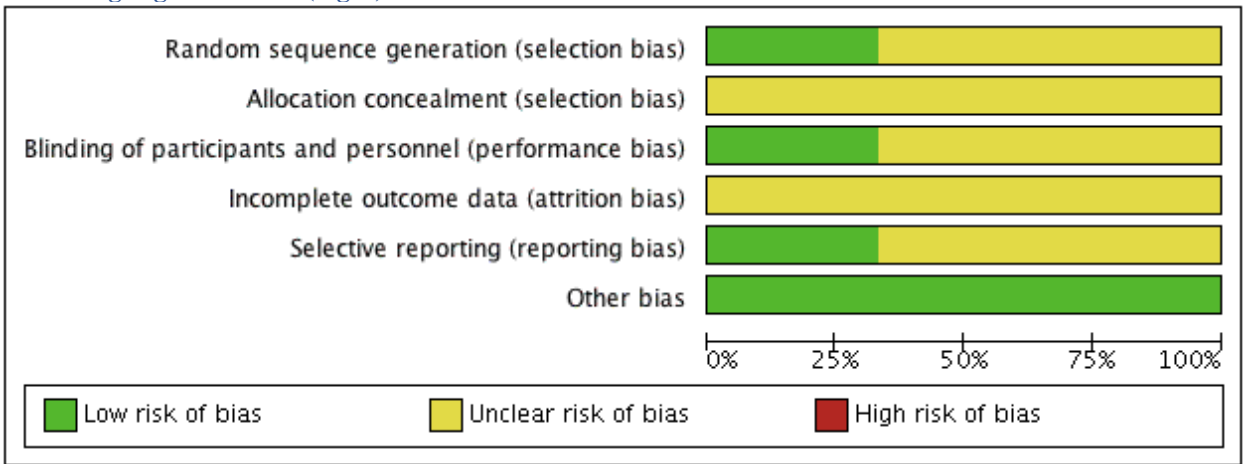

Colored bars represent the proportion of trials assessed as low (green), unclear (yellow) or high (red) risk of bias for the six domains of bias above according to criteria set by the Cochrane Risk of Bias tool in the 3 included controlled trial comparisons.

High other risk of bias (carry-over effect) was given to crossover trials which had no washout between interventions. Trials which did not have this characteristic were rated as Low.

**Supplemental Figure S5: Risk of bias proportion graph for the effect of important food sources of fructose-containing sugars on TNF- $\alpha$  (pg/mL) trials in substitution trials**

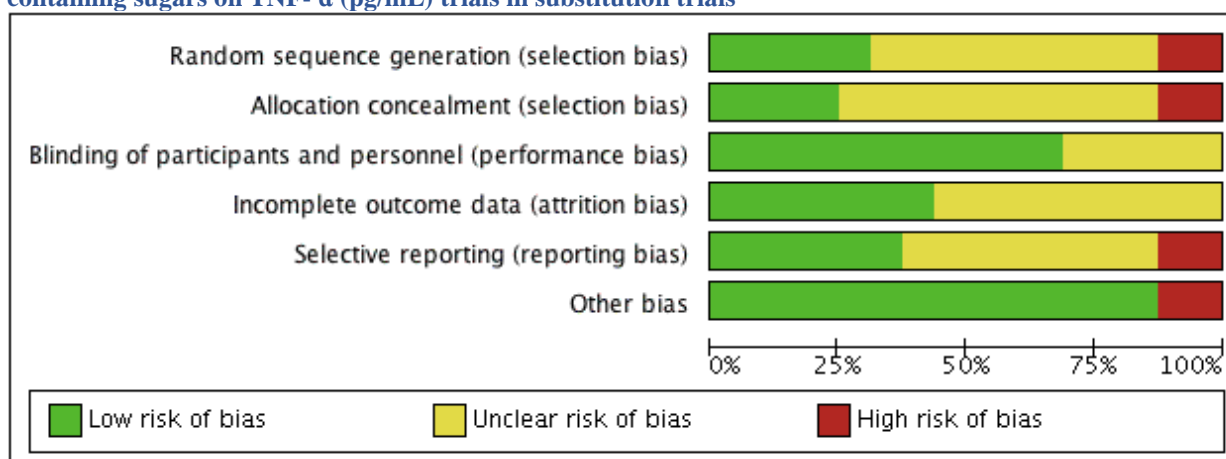

Colored bars represent the proportion of trials assessed as low (green), unclear (yellow) or high (red) risk of bias for the six domains of bias above according to criteria set by the Cochrane Risk of Bias tool in the 16 included controlled trial comparisons.

High other risk of bias (carry-over effect) was given to crossover trials which had no washout between interventions. Trials which did not have this characteristic were rated as Low.

**Supplemental Figure S6: Risk of bias proportion graph for the effect of important food sources of fructose-containing sugars on TNF- $\alpha$  (pg/mL) in addition trials**

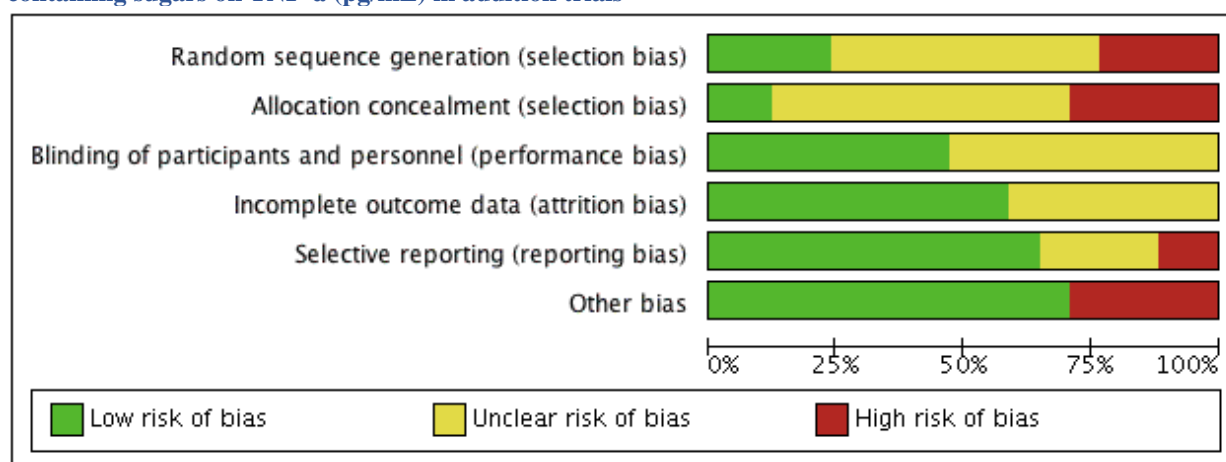

Colored bars represent the proportion of trials assessed as low (green), unclear (yellow) or high (red) risk of bias for the six domains of bias above according to criteria set by the Cochrane Risk of Bias tool in the 17 included controlled trial comparisons.

High other risk of bias (carry-over effect) was given to crossover trials which had no washout between interventions. Trials which did not have this characteristic were rated as Low.

**Supplemental Figure S7: Risk of bias proportion graph for the effect of important food sources of fructose-containing sugars on IL-6 (pg/mL) in substitution trials**

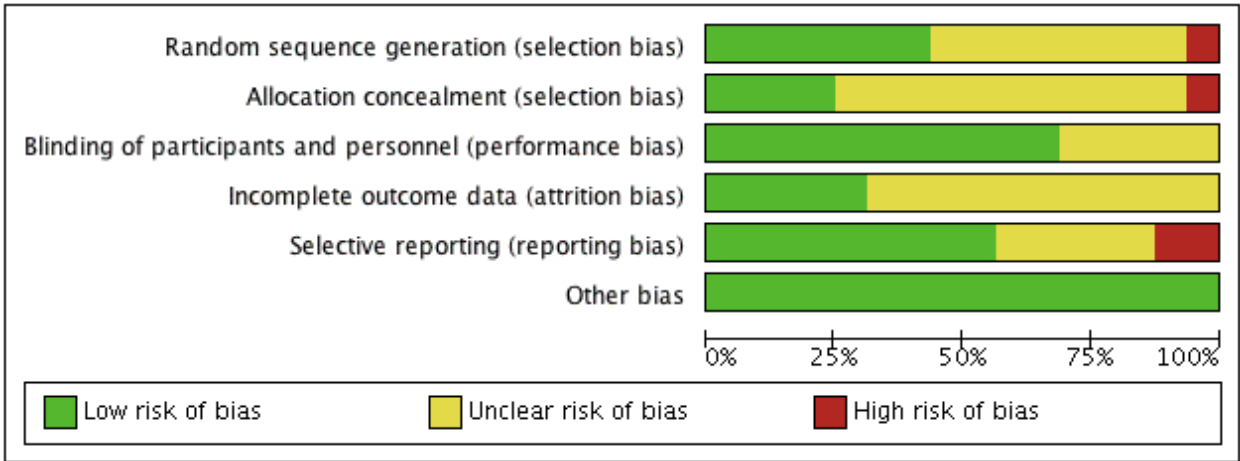

Colored bars represent the proportion of trials assessed as low (green), unclear (yellow) or high (red) risk of bias for the six domains of bias above according to criteria set by the Cochrane Risk of Bias tool in the 16 included controlled trial comparisons.  
High other risk of bias (carry-over effect) was given to crossover trials which had no washout between interventions. Trials which did not have this characteristic were rated as Low.

**Supplemental Figure S8: Risk of bias proportion graph for the effect of important food sources of fructose-containing sugars on IL-6 (pg/mL) in addition trials**

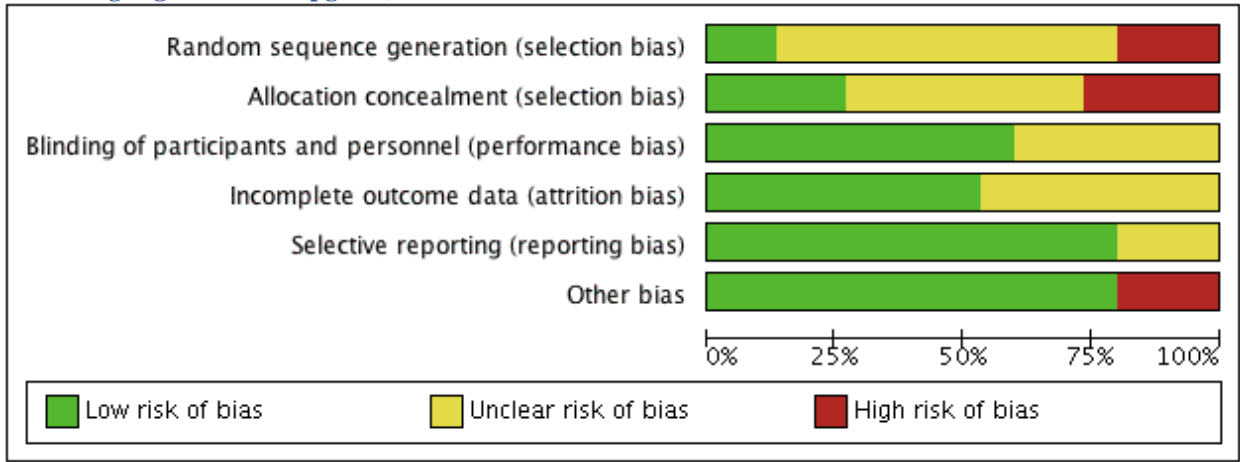

Colored bars represent the proportion of trials assessed as low (green), unclear (yellow) or high (red) risk of bias for the six domains of bias above according to criteria set by the Cochrane Risk of Bias tool in the 15 included controlled trial comparisons.  
High other risk of bias (carry-over effect) was given to crossover trials which had no washout between interventions. Trials which did not have this characteristic were rated as Low.

## Supplemental Figure S9: Forest plot of controlled trials of the effect of important food sources of fructose-containing sugars on CRP (mg/L) in substitution trials

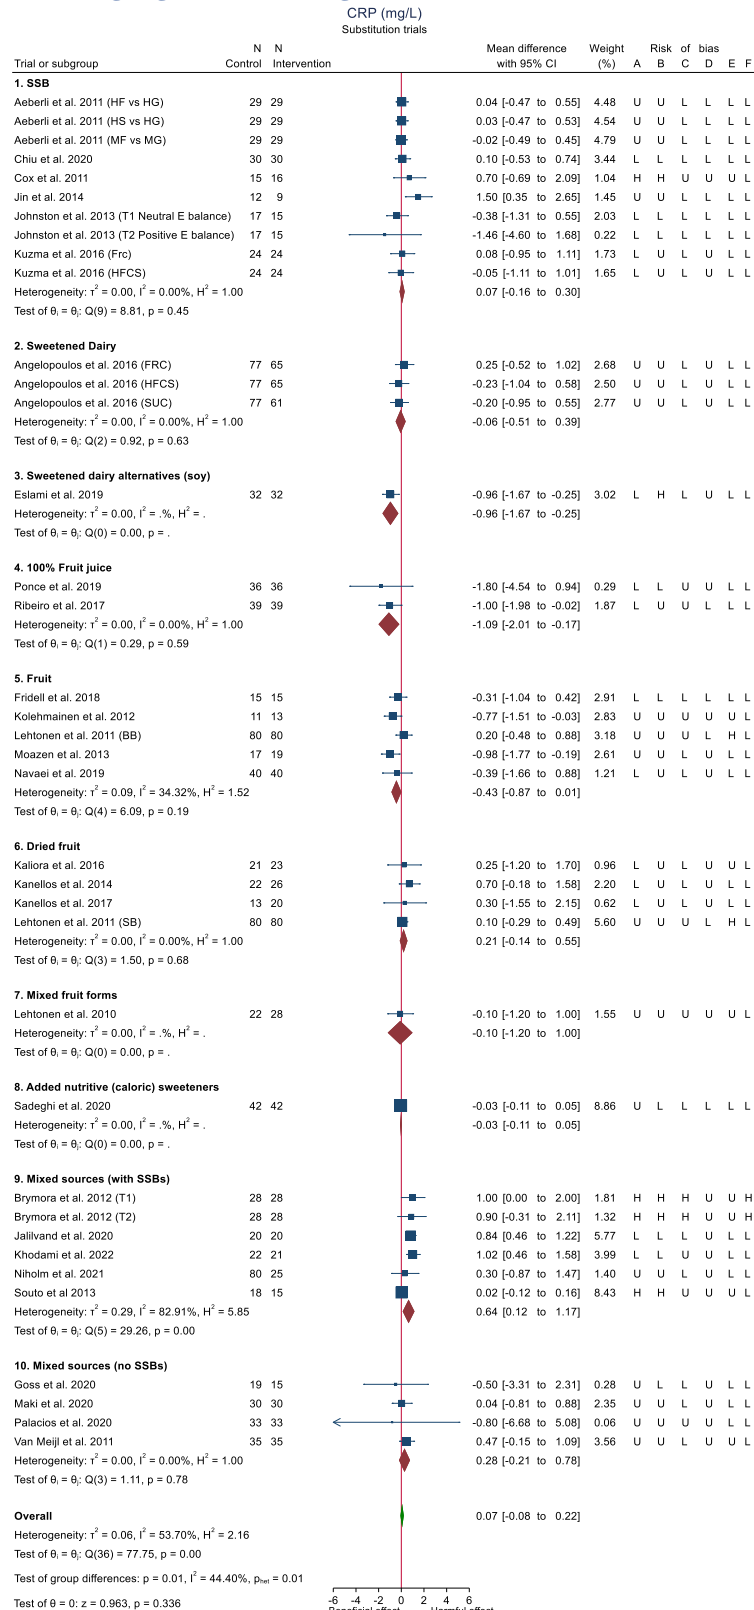

CI, confidence interval; CRP= C reactive protein; BB= Bilberries; FRC= fructose; HG=high glucose; HS=high sucrose; HF=high fructose; MG=medium glucose; MF= medium fructose; HFCS=high-fructose corn syrup; SB= sea buckthorn berries; SSB=sugar-sweetened beverage; SUC= Sucrose; T1= Test 1;T2= Test 2

Pooled effect estimates for each subgroup and overall effect are represented by the diamonds. Data are expressed as weighted mean differences with 95% confidence intervals using the generic inverse-variance method and random effects DerSimonian-Laird model. Paired analyses were applied to all crossover trials. Inter-study heterogeneity was assessed using the Cochrane Q statistic and quantified using the  $I^2$  statistic, with significance set at  $p < 0.100$  and  $I^2 \geq 50\%$  considered to be evidence of substantial heterogeneity.

Risk of Bias Legend: (H) High Risk; (L) Low Risk; (U) Unclear. The letters represent the following risk of bias domains: A, random sequence generation (selection bias); B, allocation concealment (selection bias); C, blinding of participants and personnel and outcome assessors (performance bias); D, incomplete outcome data (attrition bias); E, selective reporting (reporting bias); and F, other bias. High other risk of bias (carry-over effect) was given to crossover trials which had no washout between interventions. Trials which did not have this characteristic were rated as Low.

Pooled effect summary calculated with the  $\chi^2$  test. Test for group differences calculated with meta-regression, which uses the Wald test.



# Supplemental Figure S10: Forest plot of controlled trials of the effect of important food sources of fructose-containing sugars on CRP (mg/L) in addition trials

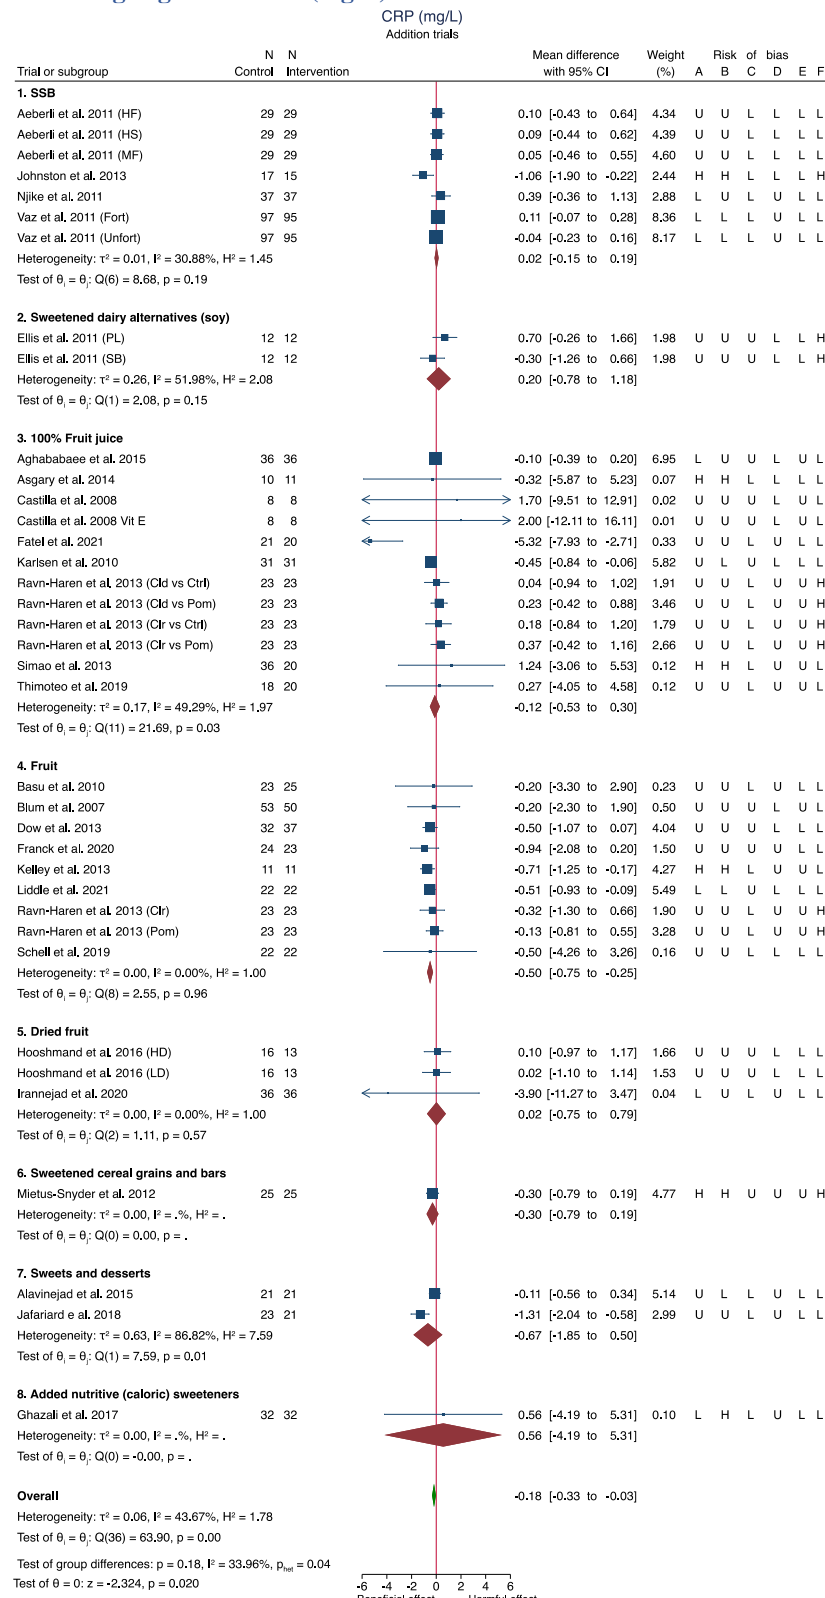

CI, confidence interval; CRP= C reactive protein; Cld=Cloudy; Ctrl=Control; Clr=Clear; Pom=Pomace; Frc= fructose; Fort= fortified; HS=high sucrose; HF=high fructose; MF= medium fructose; HD=higher dose; LD=lower dose; HFCS=high-fructose corn syrup; PB=placebo; SB= strawberries; SSB=sugar-sweetened beverage; T1= Test 1; T2= Test 2; Unfort= unfortified; Vit E= vitamin E.

Pooled effect estimates for each subgroup and overall effect are represented by the diamonds. Data are expressed as weighted mean differences with 95% confidence intervals using the generic inverse-variance method and random effects DerSimonian-Laird model. Paired analyses were applied to all crossover trials. Inter-study heterogeneity was assessed using the Cochrane Q statistic and quantified using the  $I^2$  statistic, with significance set at  $p < 0.100$  and  $I^2 \geq 50\%$  considered to be evidence of substantial heterogeneity.

Risk of Bias Legend: (H) High Risk; (L) Low Risk; (U) Unclear. The letters represent the following risk of bias domains: A, random sequence generation (selection bias); B, allocation concealment (selection bias); C, blinding of participants and personnel and outcome assessors (performance bias); D, incomplete outcome data (attrition bias); E, selective reporting (reporting bias); and F, other bias. High other risk of bias (carry-over effect) was given to crossover trials which had no washout between interventions. Trials which did not have this characteristic were rated as Low.

Pooled effect summary calculated with the  $\chi^2$  test. Test for group differences calculated with meta-regression, which uses the Wald test.

**Supplemental Figure S11: Forest plot of controlled trials of the effect of important food sources of fructose-containing sugars on CRP (mg/L) in subtraction trials**

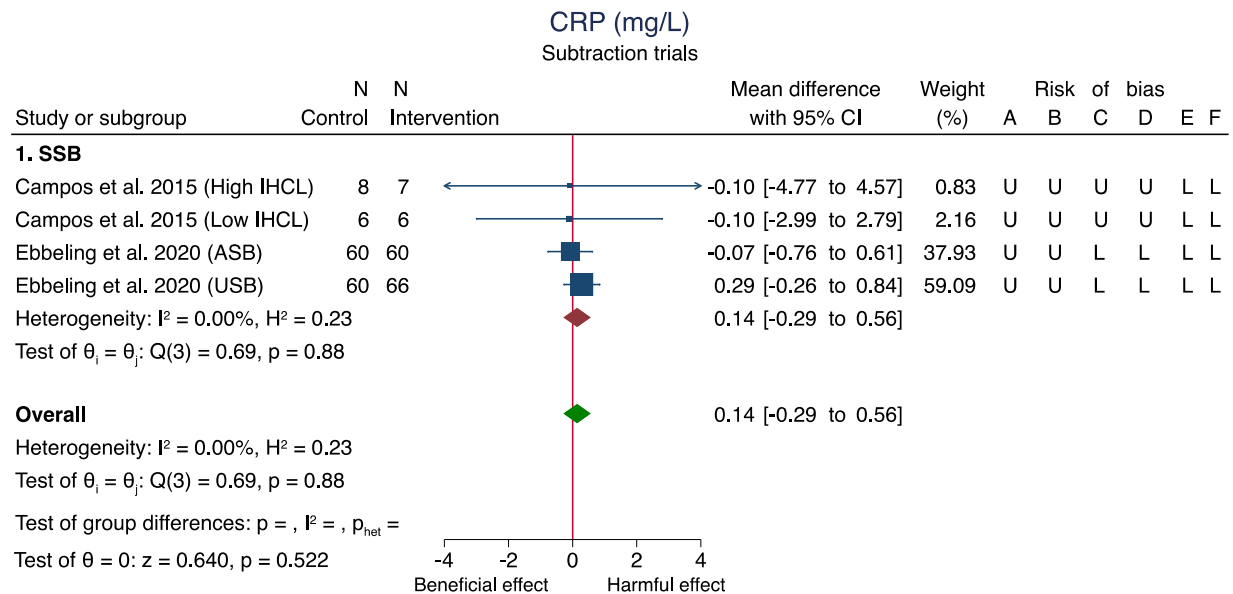

CI, confidence interval; ASB= artificially sweetened beverage; CRP= C reactive protein; IHCL= intrahepatocellular lipid; SSB=sugar-sweetened beverage; USB = unsweetened beverage.

Pooled effect estimates for each subgroup and overall effect are represented by the diamonds. Data are expressed as weighted mean differences with 95% confidence intervals using the generic inverse-variance method and random effects DerSimonian-Laird model. Paired analyses were applied to all crossover trials. Inter-study heterogeneity was assessed using the Cochrane Q statistic and quantified using the  $I^2$  statistic, with significance set at  $p < 0.100$  and  $I^2 \geq 50\%$  considered to be evidence of substantial heterogeneity.

Risk of Bias Legend: (H) High Risk; (L) Low Risk; (U) Unclear. The letters represent the following risk of bias domains: A, random sequence generation (selection bias); B, allocation concealment (selection bias); C, blinding of participants and personnel and outcome assessors (performance bias); D, incomplete outcome data (attrition bias); E, selective reporting (reporting bias); and F, other bias. High other risk of bias (carry-over effect) was given to crossover trials which had no washout between interventions. Trials which did not have this characteristic were rated as Low.

Pooled effect summary calculated with the  $\chi^2$  test. Test for group differences calculated with meta-regression, which uses the Wald test.

**Supplemental Figure S12: Forest plot of controlled trials of the effect of important food sources of fructose-containing sugars on CRP (mg/L) *ad libitum* trials**

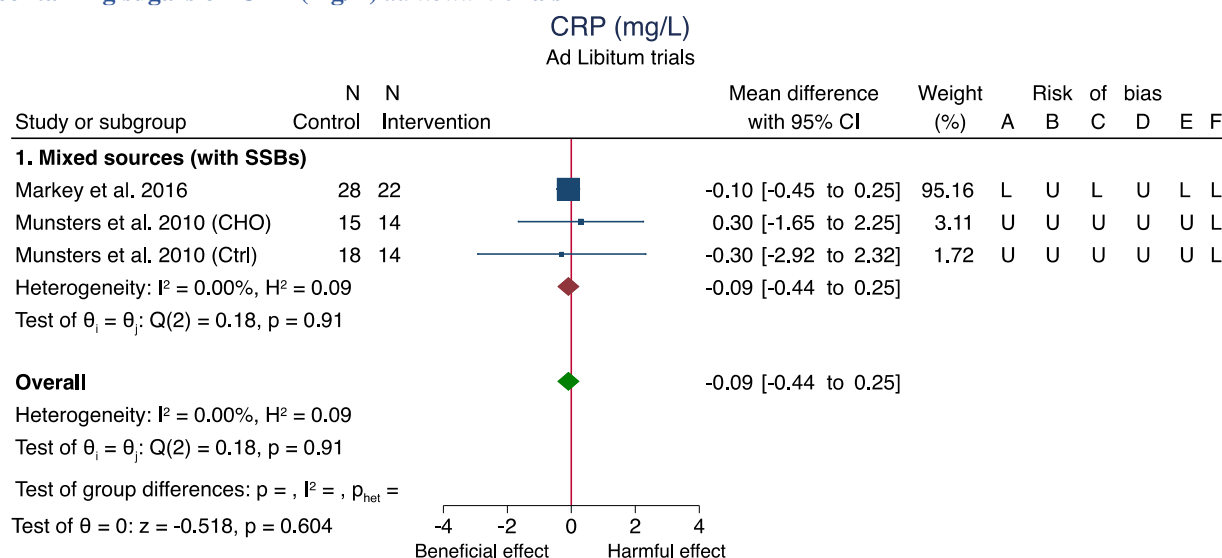

CI, confidence interval; CRP= C reactive protein; CHO= Carbohydrate; Ctrl= Control; SSB= sugar sweetened beverage.

Pooled effect estimates for each subgroup and overall effect are represented by the diamonds. Data are expressed as weighted mean differences with 95% confidence intervals using the generic inverse-variance method and random effects DerSimonian-Laird model. Paired analyses were applied to all crossover trials. Inter-study heterogeneity was assessed using the Cochrane Q statistic and quantified using the  $I^2$  statistic, with significance set at  $p < 0.100$  and  $I^2 \geq 50\%$  considered to be evidence of substantial heterogeneity.

Risk of Bias Legend: (H) High Risk; (L) Low Risk; (U) Unclear. The letters represent the following risk of bias domains: A, random sequence generation (selection bias); B, allocation concealment (selection bias); C, blinding of participants and personnel and outcome assessors (performance bias); D, incomplete outcome data (attrition bias); E, selective reporting (reporting bias); and F, other bias. High other risk of bias (carry-over effect) was given to crossover trials which had no washout between interventions. Trials which did not have this characteristic were rated as Low.

Pooled effect summary calculated with the  $\chi^2$  test. Test for group differences calculated with meta-regression, which uses the Wald test.

**Supplemental Figure S13: Forest plot of controlled trials of the effect of important food sources of fructose-containing sugars on TNF- $\alpha$  (pg/mL) trials in substitution trials**

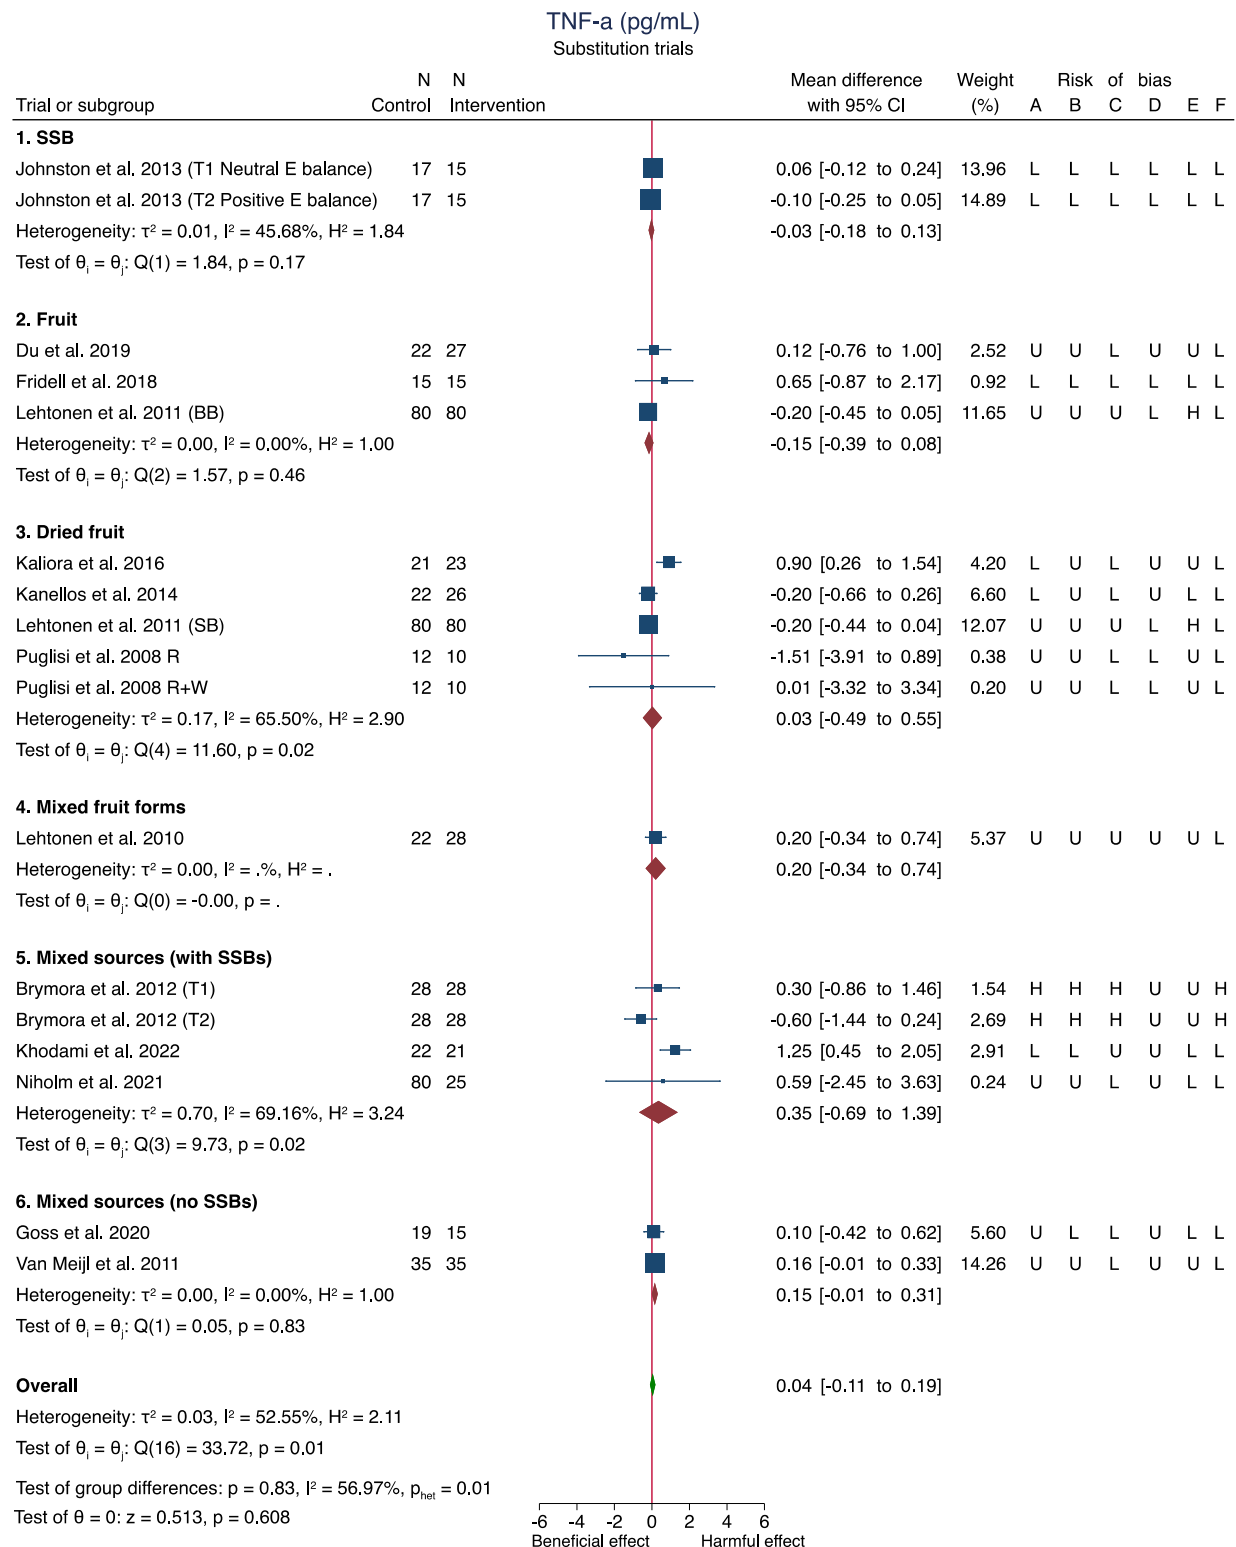

CI, confidence interval; BB= Bilberries; SB= sea buckthorn berries; SSB=sugar-sweetened beverage; TNF- $\alpha$ = Tumour necrosis factor-alpha; R= Raisin; R+W= Raisin + Walk; T1 = Test 1; T2= Test 2

Pooled effect estimates for each subgroup and overall effect are represented by the diamonds. Data are expressed as weighted mean differences with 95% confidence intervals using the generic inverse-variance method and random effects DerSimonian-Laird model. Paired analyses were applied to all crossover trials. Inter-study heterogeneity was assessed using the Cochrane Q statistic and quantified using the  $I^2$  statistic, with significance set at  $p < 0.100$  and  $I^2 \geq 50\%$  considered to be evidence of substantial heterogeneity.

Risk of Bias Legend: (H) High Risk; (L) Low Risk; (U) Unclear. The letters represent the following risk of bias domains: A, random sequence generation (selection bias); B, allocation concealment (selection bias); C, blinding of participants and personnel and outcome assessors (performance bias); D, incomplete outcome data (attrition bias); E, selective reporting (reporting bias); and F, other bias. High other risk of bias (carry-over effect) was given to crossover trials which had no washout between interventions. Trials which did not have this characteristic were rated as Low.

Pooled effect summary calculated with the  $\chi^2$  test. Test for group differences calculated with meta-regression, which uses the Wald test.

**Supplemental Figure S14: Forest plot of controlled trials of the effect of important food sources of fructose-containing sugars on TNF- $\alpha$  (pg/mL) trials in addition trials**

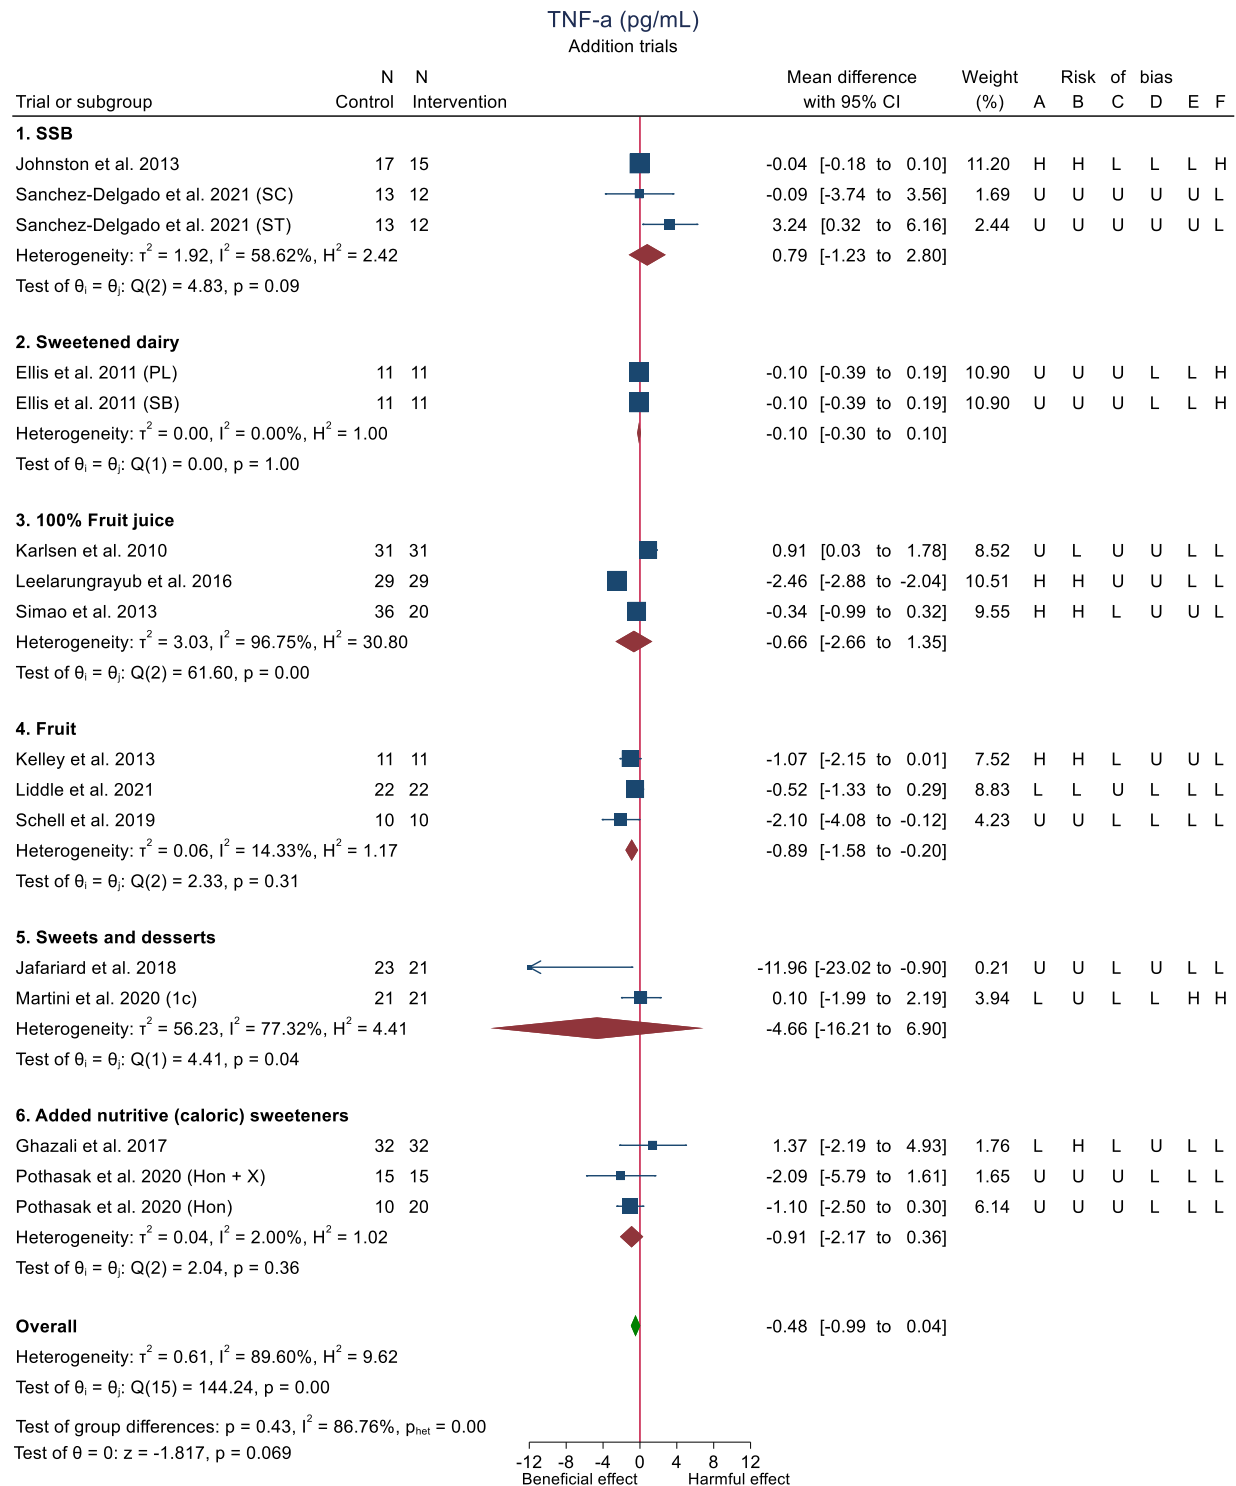

CI, confidence interval; Hon= Honey; Hon + X= Honey + exercise; PL= Placebo; SB= Strawberry; SC= Sucralose; SSB=sugar-sweetened beverage; ST= Steviol; TNF= Tumour necrosis factor-alpha; 1c= 1 cup.

Pooled effect estimates for each subgroup and overall effect are represented by the diamonds. Data are expressed as weighted mean differences with 95% confidence intervals using the generic inverse-variance method and random effects DerSimonian-Laird model. Paired analyses were applied to all crossover trials. Inter-study heterogeneity was assessed using the Cochrane Q statistic and quantified using the  $I^2$  statistic, with significance set at  $p < 0.100$  and  $I^2 \geq 50\%$  considered to be evidence of substantial heterogeneity.

Risk of Bias Legend: (H) High Risk; (L) Low Risk; (U) Unclear. The letters represent the following risk of bias domains: A, random sequence generation (selection bias); B, allocation concealment (selection bias); C, blinding of participants and personnel and outcome assessors (performance bias); D, incomplete outcome data (attrition bias); E, selective reporting (reporting bias); and F, other bias. High other risk of bias (carry-over effect) was given to crossover trials which had no washout between interventions. Trials which did not have this characteristic were rated as Low.

Pooled effect summary calculated with the  $\chi^2$  test. Test for group differences calculated with meta-regression, which uses the Wald test.



**Supplemental Figure S15: Forest plot of controlled trials of the effect of important food sources of fructose-containing sugars on IL-6 (pg/mL) in substitution trials**

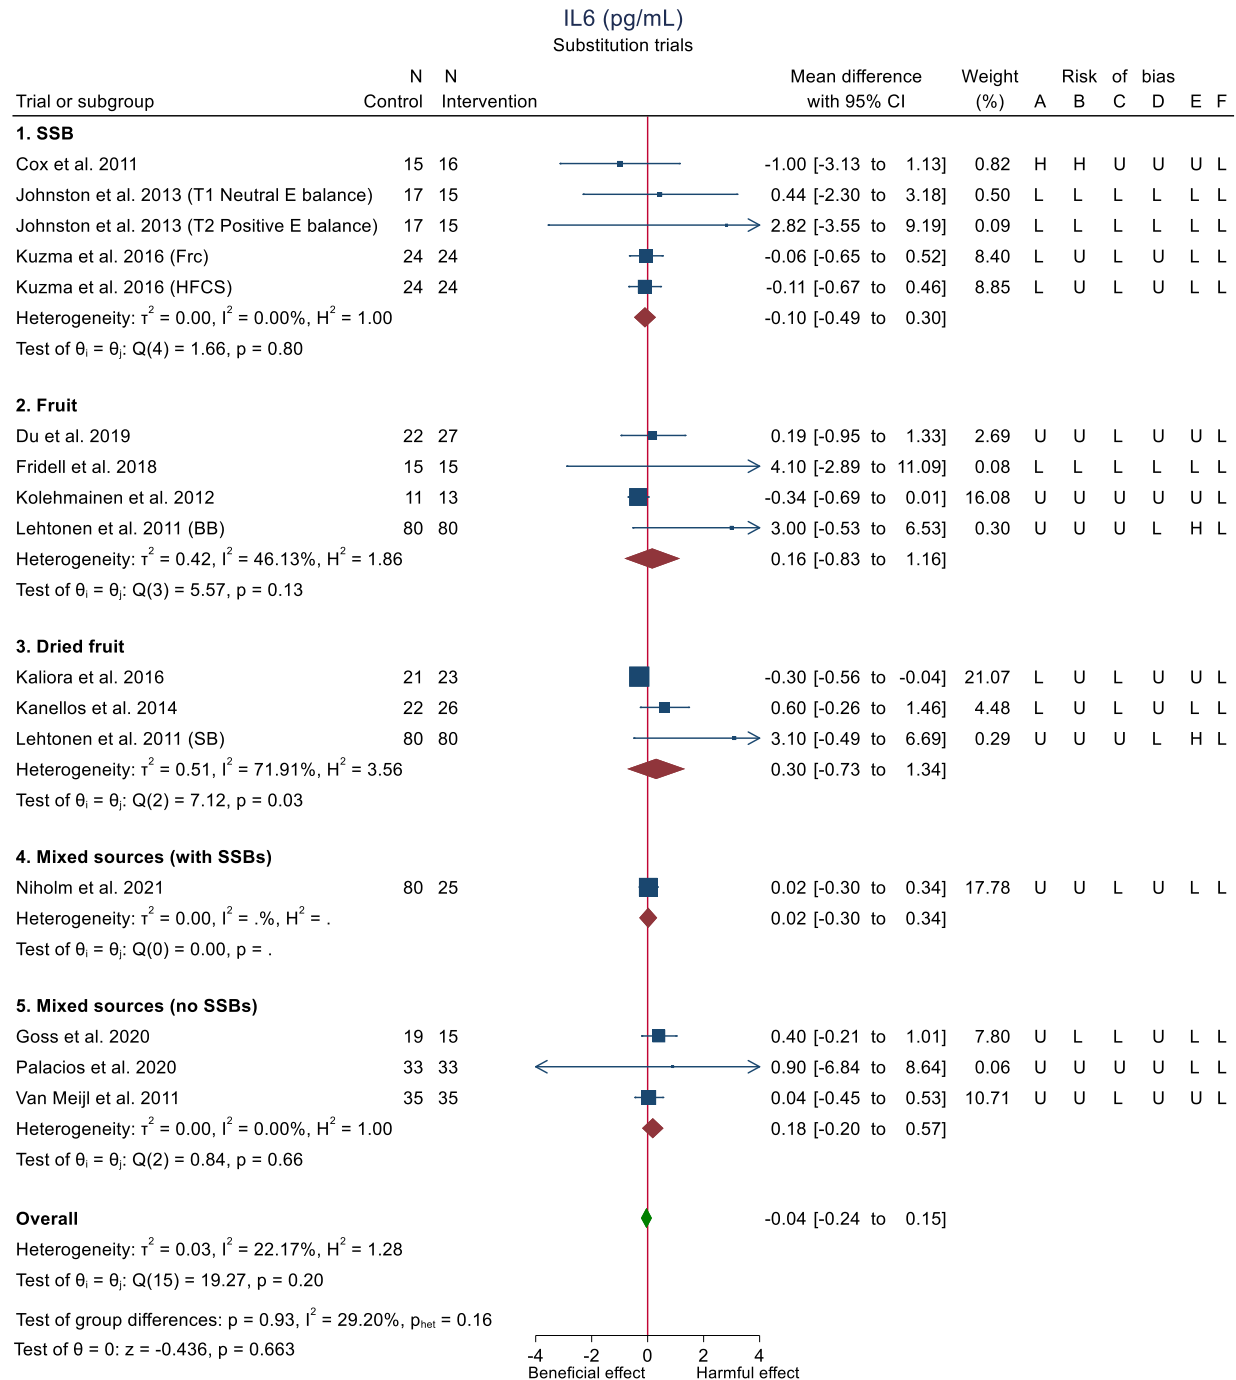

CI, confidence interval; IL6= Interleukin 6; BB= Bilberries; Frc= Fructose; HFCS= High fructose corn syrup; SB= sea buckthorn berries; SSB=sugar-sweetened beverage; T1= Test 1; T2= Test 2

Pooled effect estimates for each subgroup and overall effect are represented by the diamonds. Data are expressed as weighted mean differences with 95% confidence intervals using the generic inverse-variance method and random effects DerSimonian-Laird model. Paired analyses were applied to all crossover trials. Inter-study heterogeneity was assessed using the Cochrane Q statistic and quantified using the  $I^2$  statistic, with significance set at  $p < 0.100$  and  $I^2 \geq 50\%$  considered to be evidence of substantial heterogeneity.

Risk of Bias Legend: (H) High Risk; (L) Low Risk; (U) Unclear. The letters represent the following risk of bias domains: A, random sequence generation (selection bias); B, allocation concealment (selection bias); C, blinding of participants and personnel and outcome assessors (performance bias); D, incomplete outcome data (attrition bias); E, selective reporting (reporting bias); and F, other bias. High other risk of bias (carry-over effect) was given to crossover trials which had no washout between interventions. Trials which did not have this characteristic were rated as Low.

Pooled effect summary calculated with the  $\chi^2$  test. Test for group differences calculated with meta-regression, which uses the Wald test.

**Supplemental Figure S16: Forest plot of controlled trials of the effect of important food sources of fructose-containing sugars on IL-6 in addition trials**

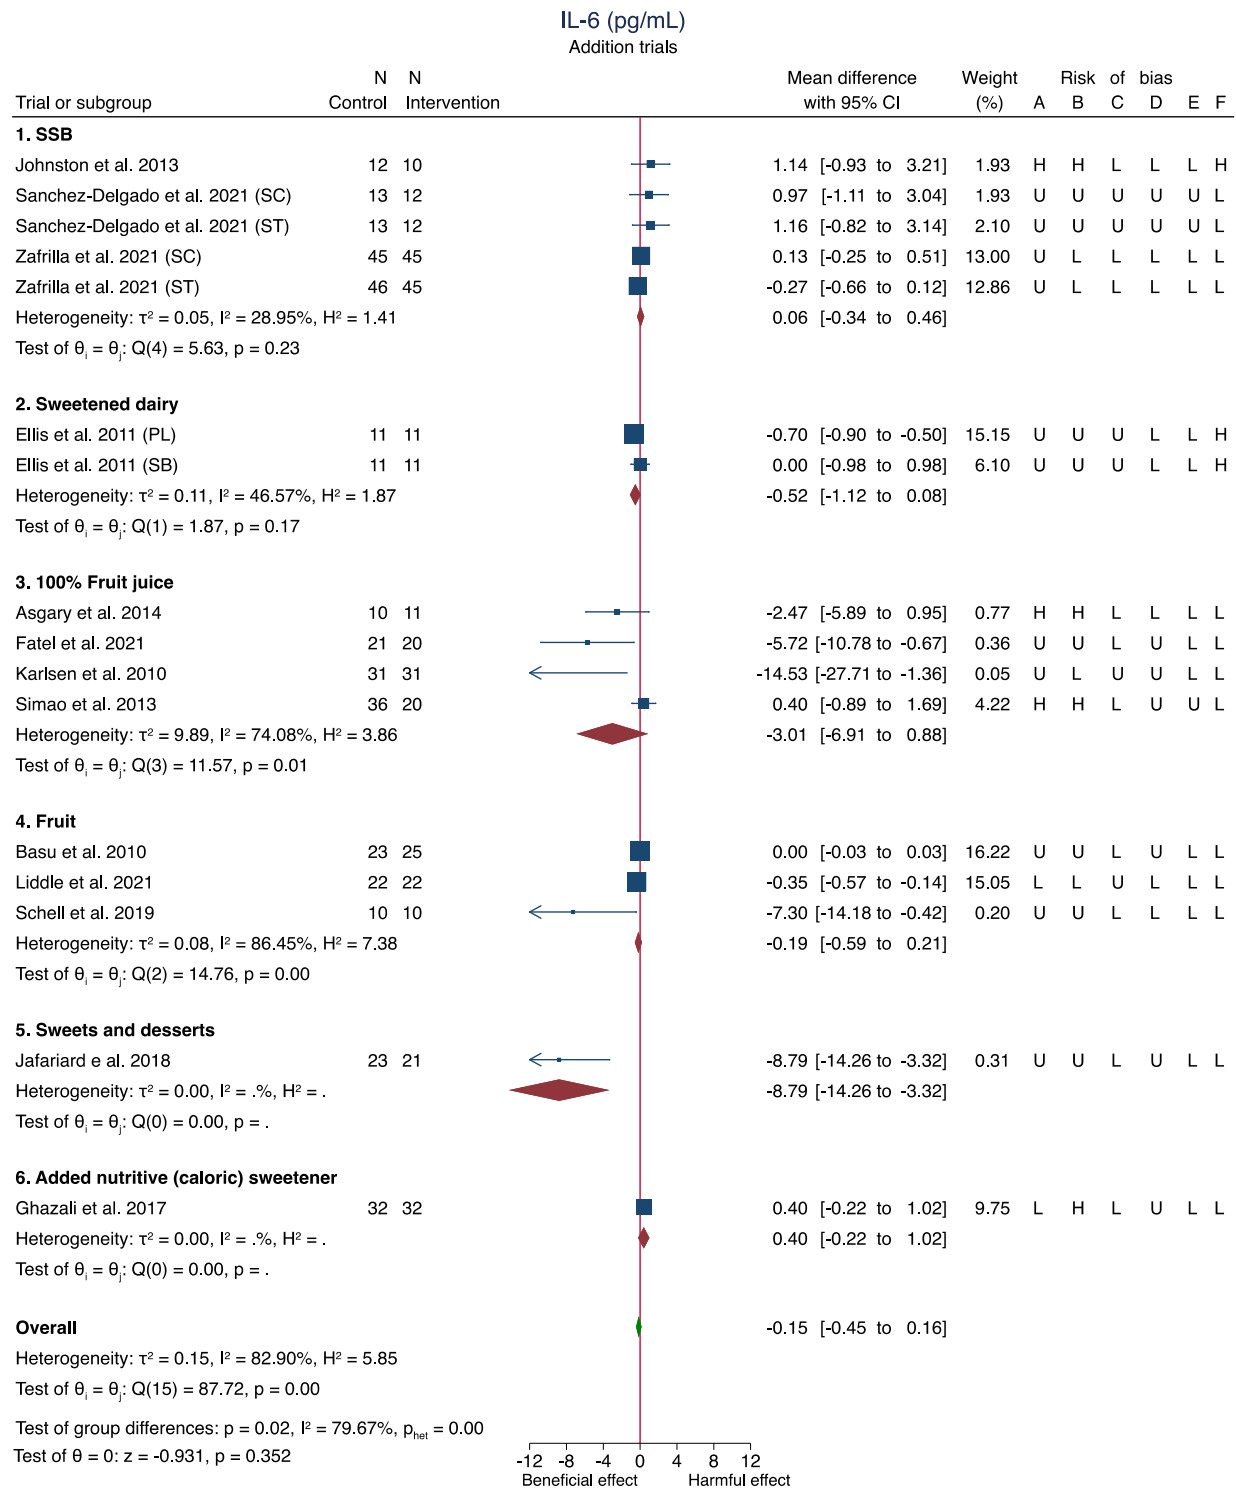

CI, confidence interval; IL-6= Interleukin 6; PL= Placebo; SB= Strawberries; SC= Sucralose; SSB=sugar-sweetened beverage; ST= Steviol

Pooled effect estimates for each subgroup and overall effect are represented by the diamonds. Data are expressed as weighted mean differences with 95% confidence intervals using the generic inverse-variance method and random effects DerSimonian-Laird model. Paired analyses were applied to all crossover trials. Inter-study heterogeneity was assessed using the Cochrane Q statistic and quantified using the  $I^2$  statistic, with significance set at  $p < 0.100$  and  $I^2 \geq 50\%$  considered to be evidence of substantial heterogeneity.

Risk of Bias Legend: (H) High Risk; (L) Low Risk; (U) Unclear. The letters represent the following risk of bias domains: A, random sequence generation (selection bias); B, allocation concealment (selection bias); C, blinding of participants and personnel and outcome assessors (performance bias); D, incomplete outcome data (attrition bias); E, selective reporting (reporting bias); and F, other bias. High other risk of bias (carry-over effect) was given to crossover trials which had no washout between interventions. Trials which did not have this characteristic were rated as Low.

Pooled effect summary calculated with the  $\chi^2$  test. Test for group differences calculated with meta-regression, which uses the Wald test.

**Supplemental Figure S17: Sensitivity analysis of the systematic removal of each trial for the effect of important food sources of fructose-containing sugars on CRP (mg/L) in substitution trials**

**Influence analysis**  
**CRP (mg/L) in substitution trials**

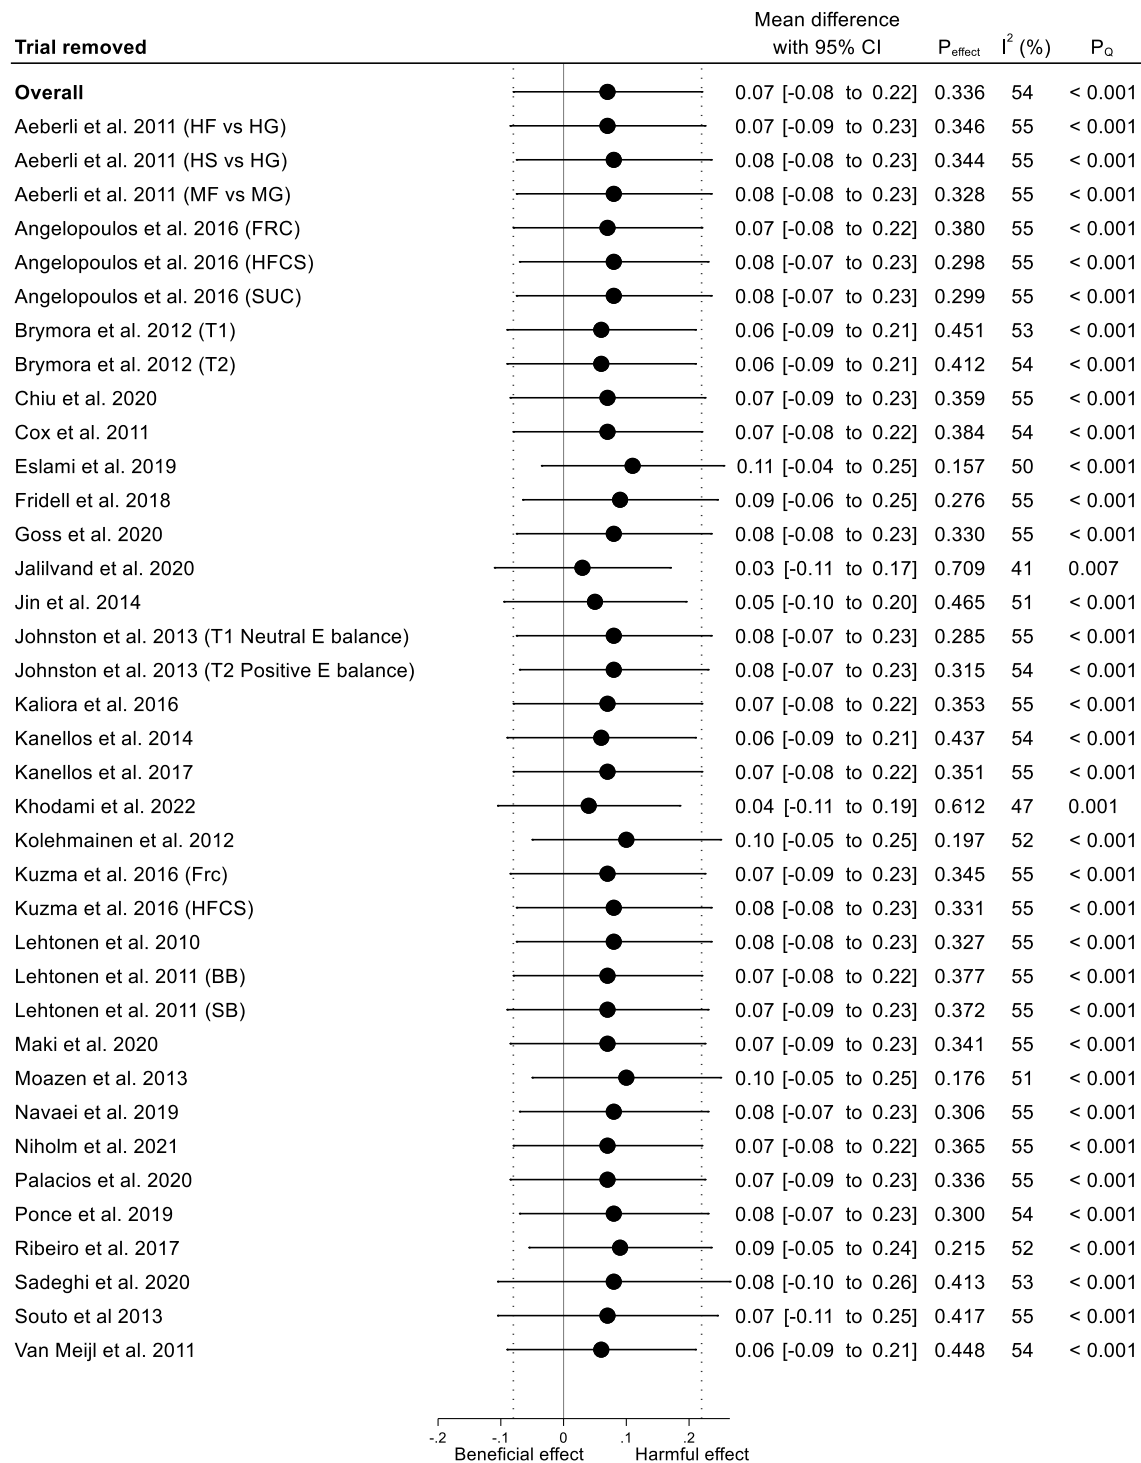

*Influence analysis: removal of each trial, one at a time and recalculation of the overall effect and heterogeneity*

CI, confidence interval; CRP= C reactive protein; BB= Bilberries; FRC= fructose; HG=high glucose; HS=high sucrose; HF=high fructose; MG=medium glucose; MF= medium fructose; HFCS=high-fructose corn syrup; SB= sea buckthorn berries; SSB=sugar-sweetened beverage; SUC= sucrose; T1= test 1; T2= Test 2

**Supplemental Figure S18: Sensitivity analysis of the systematic removal of each trial for the effect of important food sources of fructose-containing sugars on CRP (mg/L) in addition trials**

**Influence analysis**  
**CRP (mg/L) in addition trials**

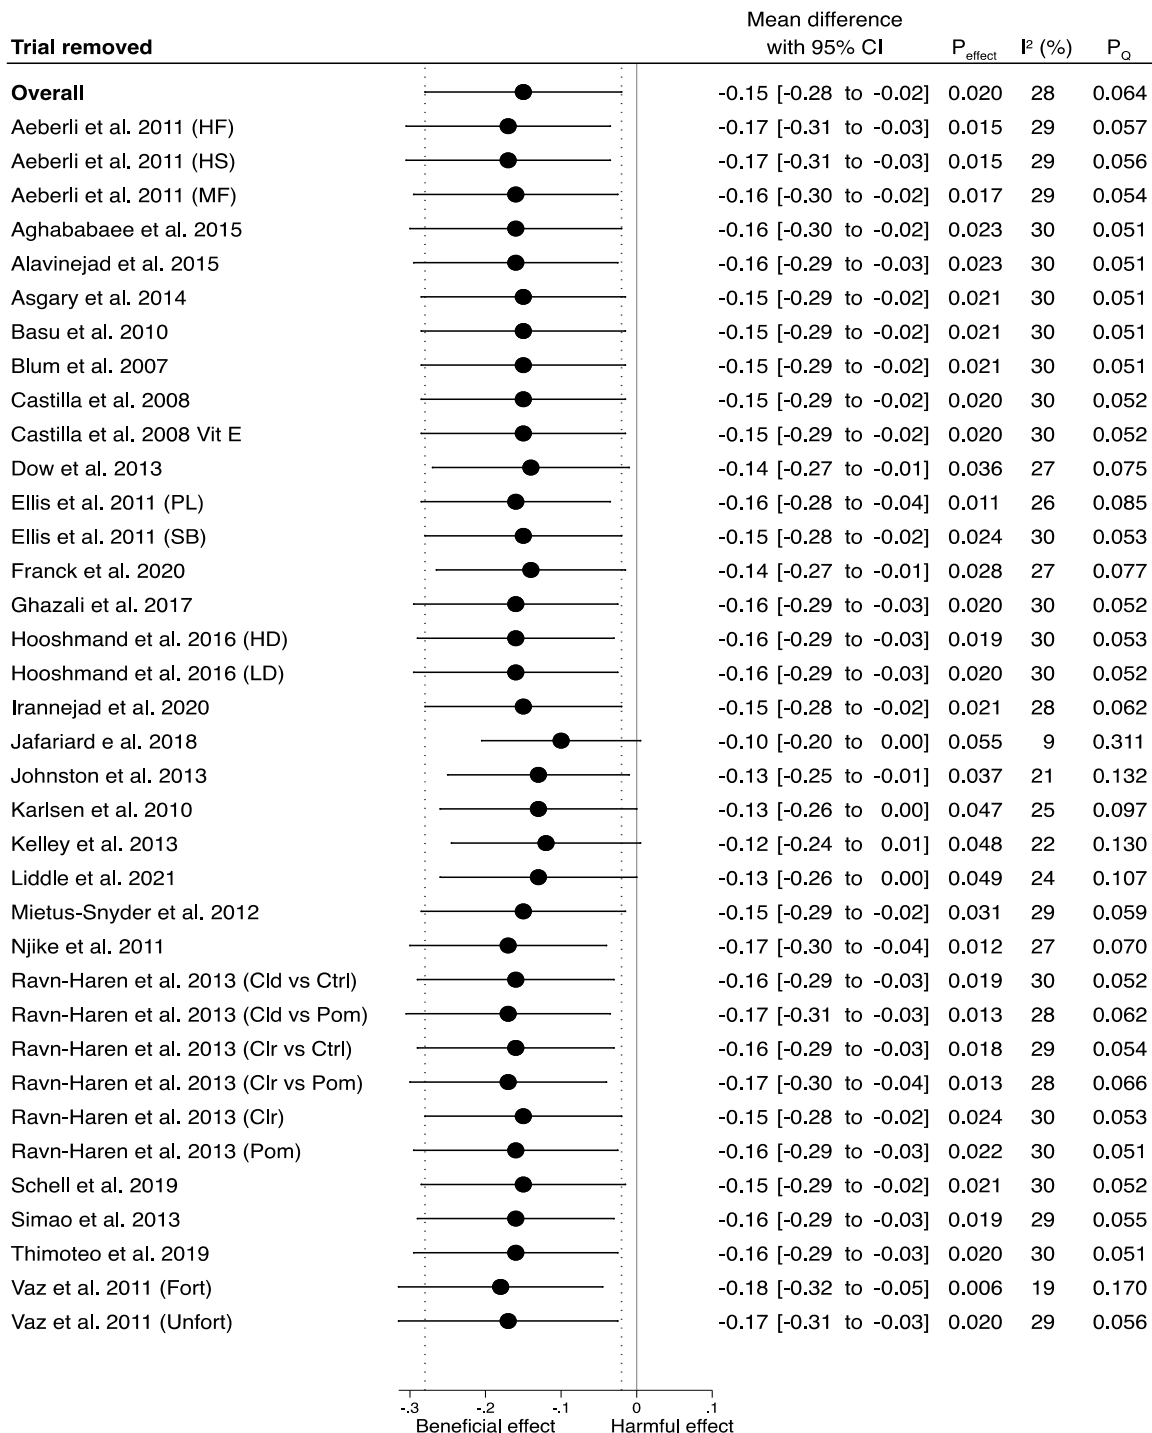

*Influence analysis: removal of each trial, one at a time and recalculation of the overall effect and heterogeneity*

CI, confidence interval; CRP= C reactive protein; Cld=Cloudy; Ctrl=Control; Clr=Clear; Pom=Pomace; Frc=fructose; fort= fortified; HS=high sucrose; HF=high fructose; MF= medium fructose; HD=higher dose; LD=lower dose; HFCS=high-fructose corn syrup; PB=placebo; SB= strawberries; SSB=sugar-sweetened beverage; unfort=unfortified; Vit E= vitamin E

**Supplemental Figure S19: Sensitivity analysis of the systematic removal of each trial in the primary analysis of the effect of important food sources of fructose-containing sugars on CRP (mg/L) in subtraction trials**

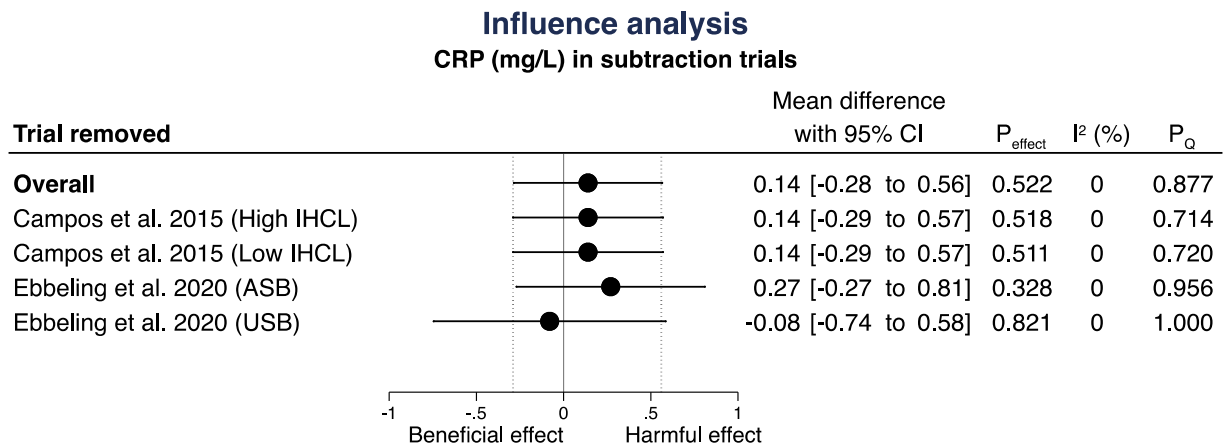

*Influence analysis: removal of each trial, one at a time and recalculation of the overall effect and heterogeneity*

CI, confidence interval; ASB= artificially sweetened beverage; CRP= C reactive protein; IHCL=intrahepatocellular lipid; USB= unsweetened beverage

**Supplemental Figure S20: Sensitivity analysis of the systematic removal of each trial for the effect of important food sources of fructose-containing sugars on CRP (mg/L) in ad libitum trials**

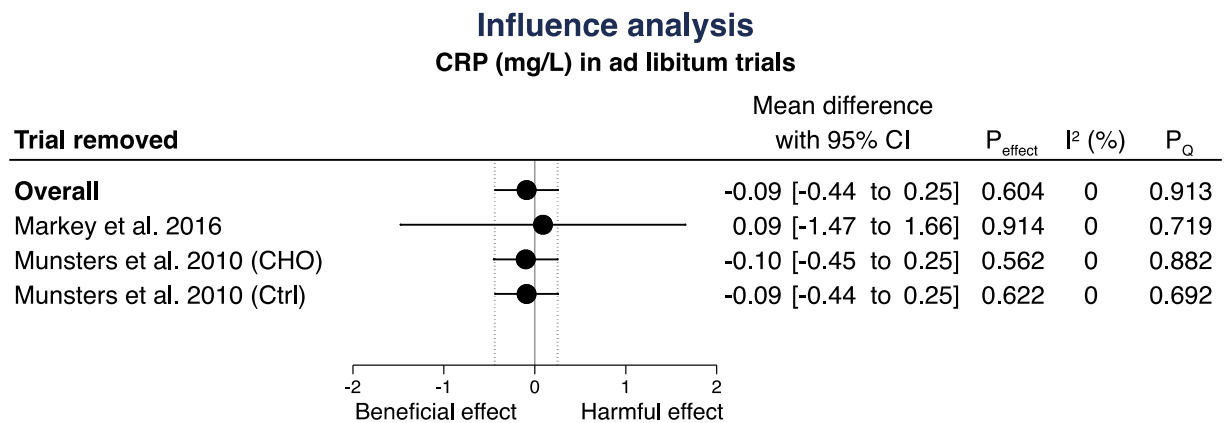

*Influence analysis: removal of each trial, one at a time and recalculation of the overall effect and heterogeneity*

CI, confidence interval; CRP= C reactive protein; CHO= Carbohydrate; Ctrl= Control

**Supplemental Figure S21: Sensitivity analysis of the systematic removal of each trial for the effect of SSB on CRP (mg/L) in substitution trials**

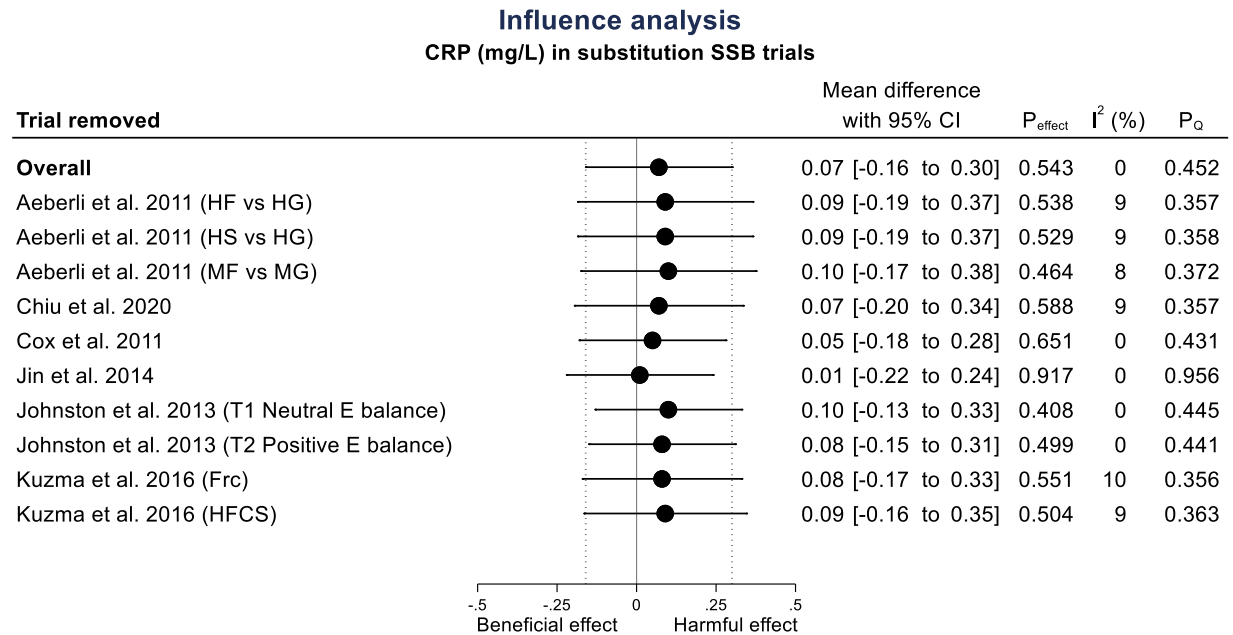

*Influence analysis: removal of each trial, one at a time and recalculation of the overall effect and heterogeneity*

CI, confidence interval; CRP= C reactive protein; BB= Bilberries; Frc= fructose; HG=high glucose; HS=high sucrose; HF=high fructose; MG=medium glucose; MF= medium fructose; HFCS=high-fructose corn syrup; SB= sea buckthorn berries; SSB=sugar-sweetened beverage; T1= Test 1; T2= Test 2

**Supplemental Figure S22: Sensitivity analysis of the systematic removal of each trial for the effect of sweetened dairy on CRP (mg/L) in substitution trials**

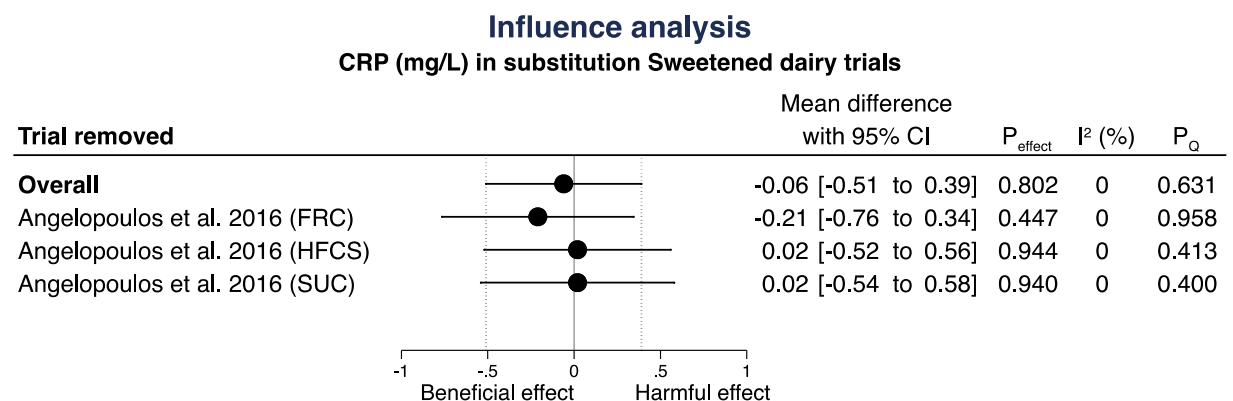

*Influence analysis: removal of each trial, one at a time and recalculation of the overall effect and heterogeneity*

CI, confidence interval; CRP= C reactive protein; FRC= Fructose; HFCS= High fructose corn syrup; SUC= sucrose



**Supplemental Figure S23: Sensitivity analysis of the systematic removal of each trial for the effect of 100% fruit juice on CRP (mg/L) in substitution trials**

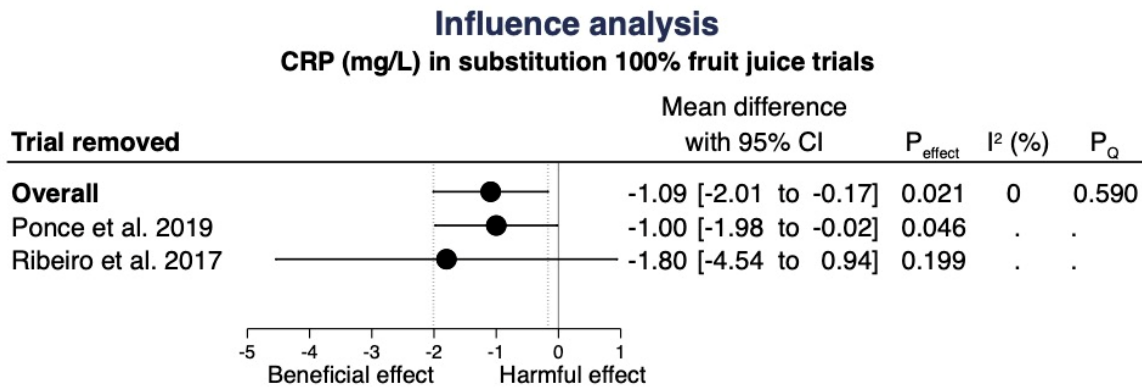

*Influence analysis: removal of each trial, one at a time and recalculation of the overall effect and heterogeneity*

CI, confidence interval; CRP= C reactive protein

**Supplemental Figure S24: Sensitivity analysis of the systematic removal of each trial for the effect of fruit on CRP (mg/L) in substitution trials**

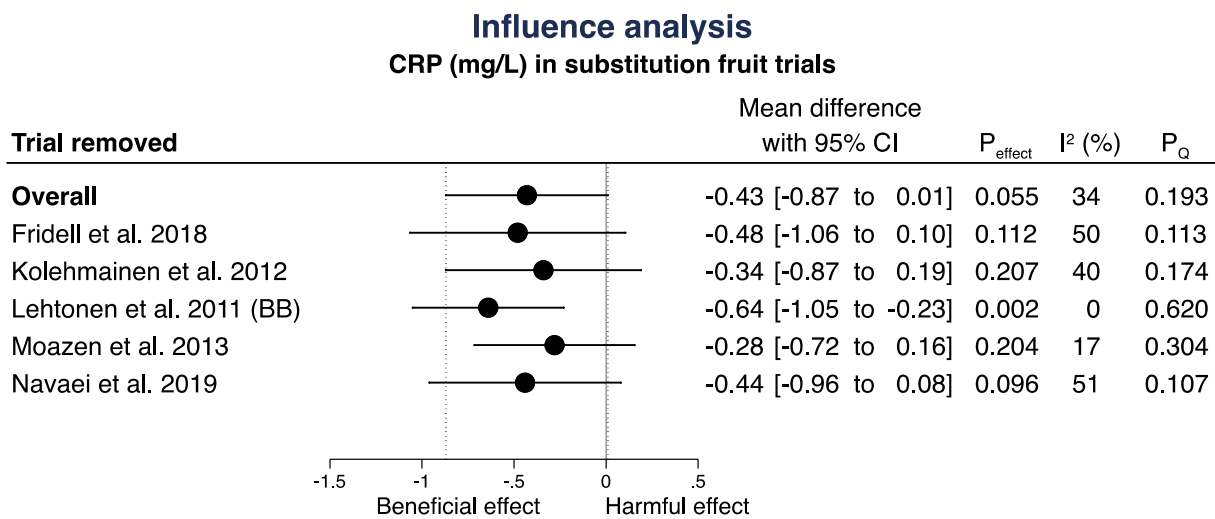

*Influence analysis: removal of each trial, one at a time and recalculation of the overall effect and heterogeneity*

CI, confidence interval; CRP= C reactive protein; BB= Bilberries

**Supplemental Figure S25: Sensitivity analysis of the systematic removal of each trial for the effect of dried fruit on CRP (mg/L) in substitution trials**

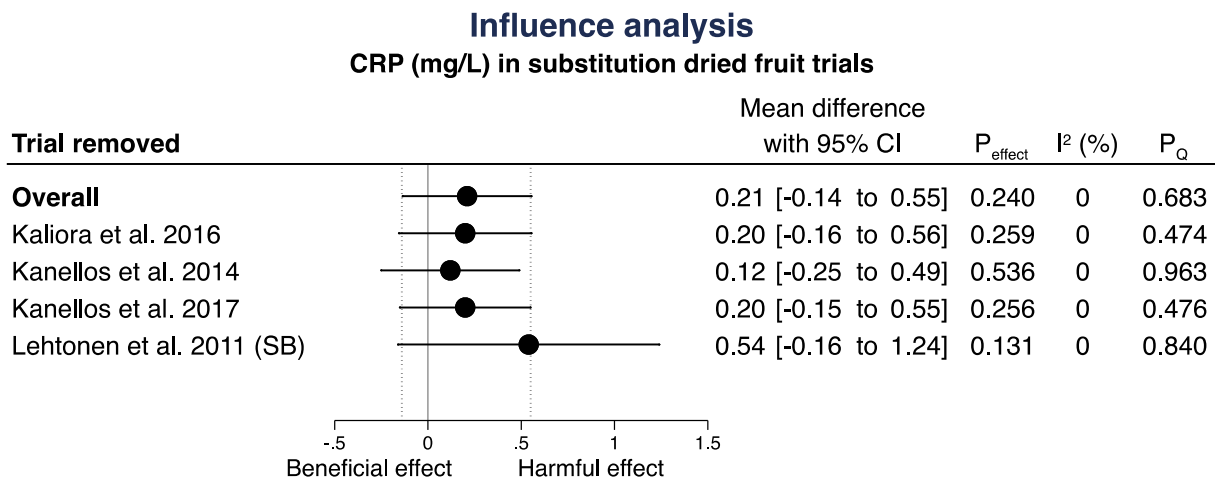

*Influence analysis: removal of each trial, one at a time and recalculation of the overall effect and heterogeneity*

CI, confidence interval; CRP= C reactive protein; SB= seabuckthorn berries

**Supplemental Figure S26: Sensitivity analysis of the systematic removal of each trial for the effect of mixed sources (with SSBs) on CRP (mg/L) in substitution trials**

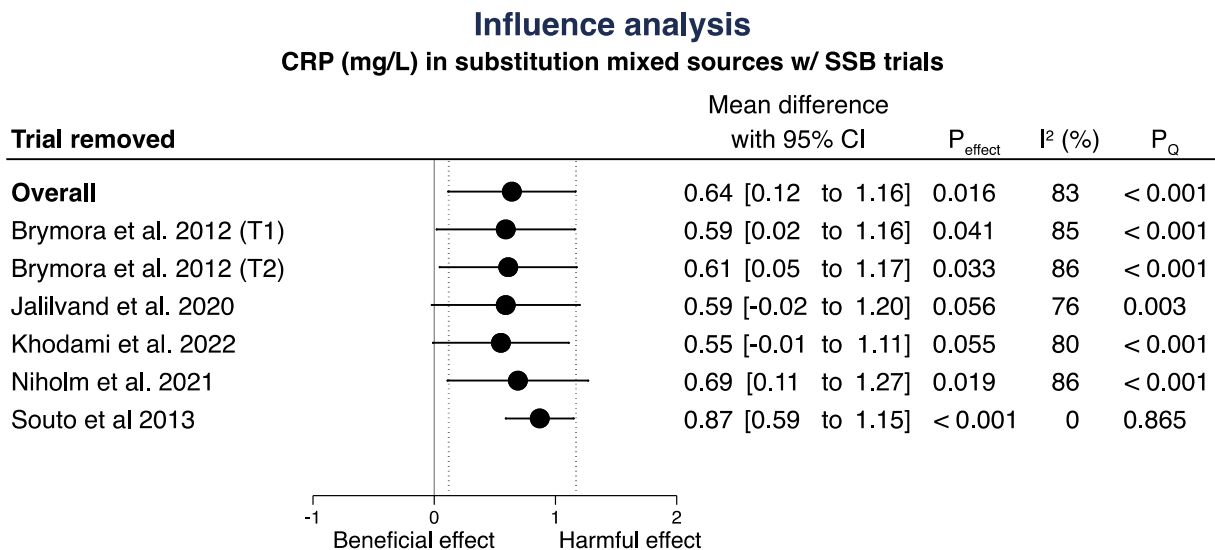

*Influence analysis: removal of each trial, one at a time and recalculation of the overall effect and heterogeneity*

CI, confidence interval; CRP= C reactive protein; SSB=sugar-sweetened beverage; T1= Test 1; T2= Test 2

**Supplemental Figure S27: Sensitivity analysis of the systematic removal of each trial for the effect of mixed sources (without SSBs) on CRP (mg/L) in substitution trials**

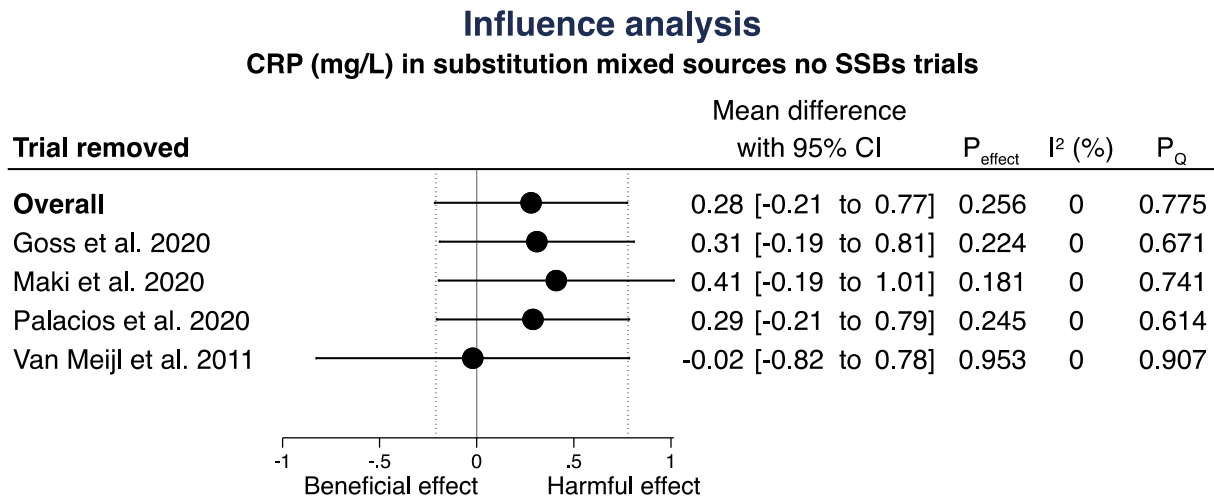

*Influence analysis: removal of each trial, one at a time and recalculation of the overall effect and heterogeneity*

CI, confidence interval; CRP= C reactive protein; SSB= sugar sweetened beverage

**Supplemental Figure S28: Sensitivity analysis of the systematic removal of each trial for the effect of SSB on CRP (mg/L) in addition trials**

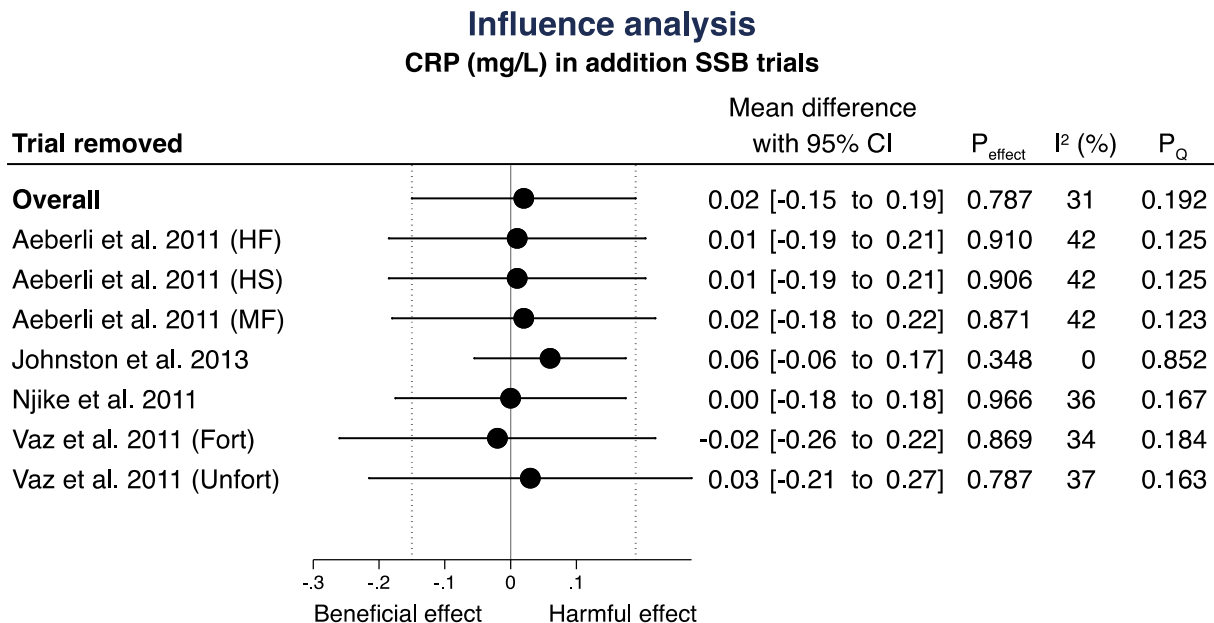

*Influence analysis: removal of each trial, one at a time and recalculation of the overall effect and heterogeneity*

CI, confidence interval; CRP= C reactive protein; fort= fortified; HS=high sucrose; HF=high fructose; MF= medium fructose; SSB=sugar-sweetened beverage; T1= test 1; T2= test 2; unfort= unfortified

**Supplemental Figure S29: Sensitivity analysis of the systematic removal of each trial for the effect of sweetened dairy alternatives (soy) on CRP (mg/L) in addition trials**

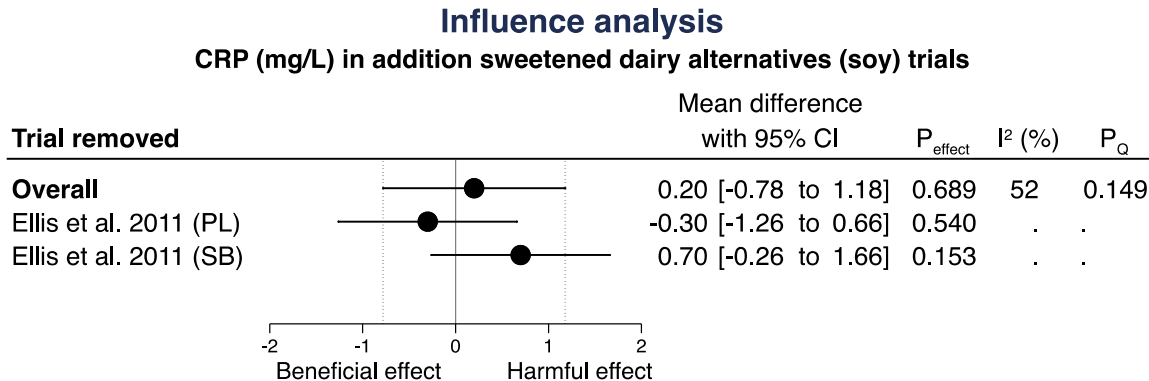

*Influence analysis: removal of each trial, one at a time and recalculation of the overall effect and heterogeneity*

CI, confidence interval; CRP= C reactive protein; PL= Placebo; SB= Strawberries

**Supplemental Figure S30: Sensitivity analysis of the systematic removal of each trial for the effect of 100% fruit juice on CRP (mg/L) in addition trials**

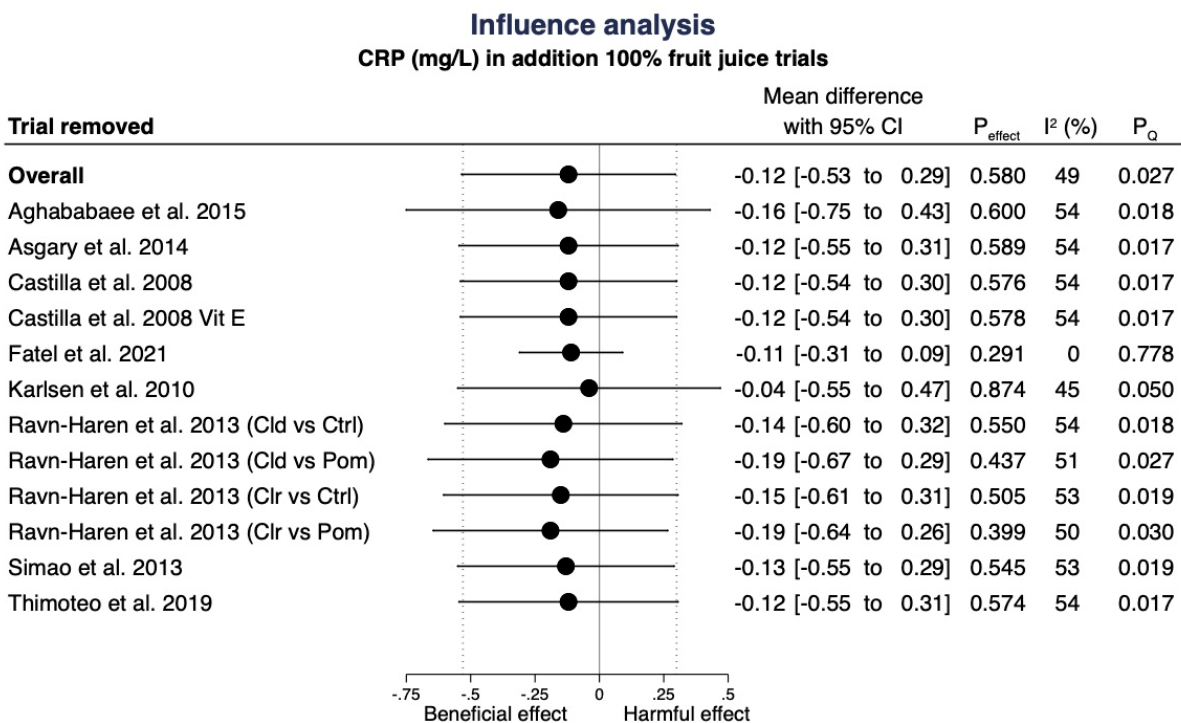

*Influence analysis: removal of each trial, one at a time and recalculation of the overall effect and heterogeneity*

CI, confidence interval; CRP= C reactive protein; Cld=Cloudy; Ctrl=Control; Clr=Clear; Pom=Pomace; Vit E= Vitamin E

**Supplemental Figure S31: Sensitivity analysis of the systematic removal of each trial for the effect of fruit on CRP (mg/L) in addition trials**

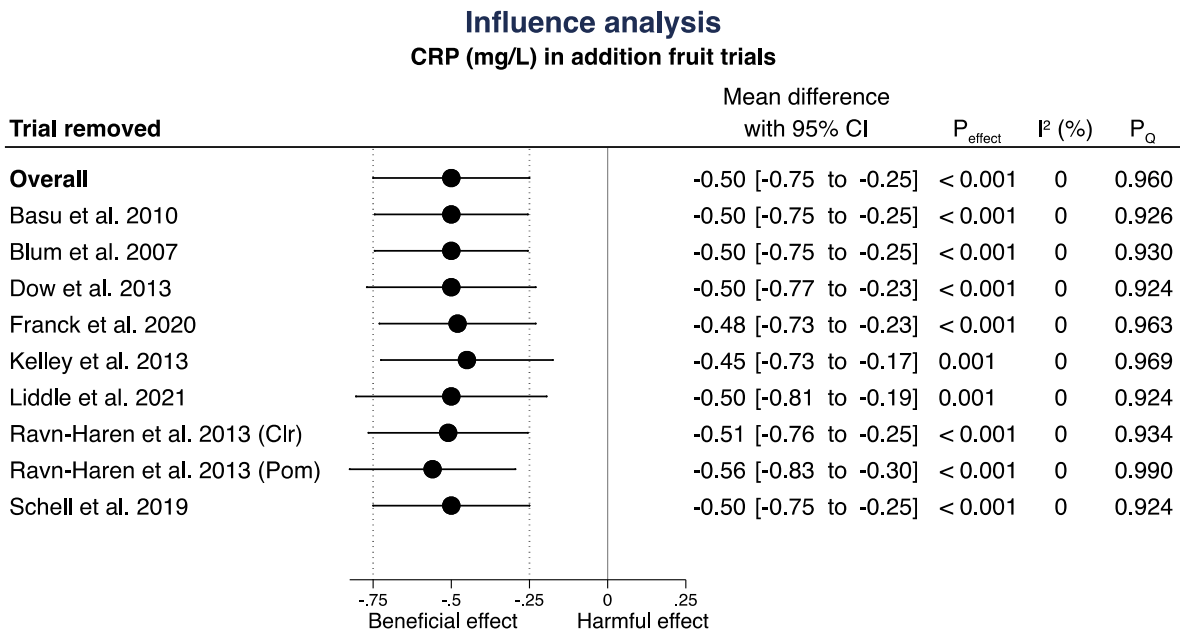

*Influence analysis: removal of each trial, one at a time and recalculation of the overall effect and heterogeneity*

CI, confidence interval; CRP= C reactive protein; Clr=Clear; Pom=Pomace

**Supplemental Figure S32: Sensitivity analysis of the systematic removal of each trial for the effect of dried fruit on CRP (mg/L) in addition trials**

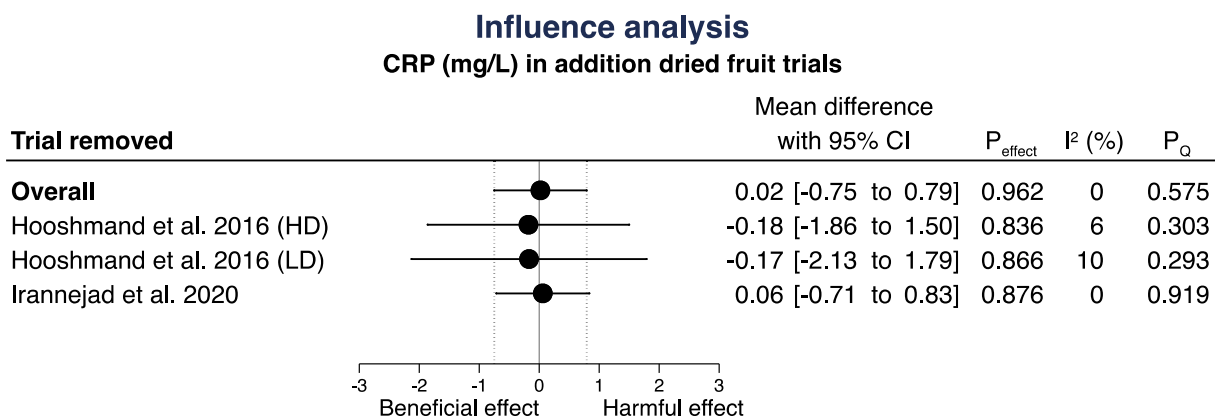

*Influence analysis: removal of each trial, one at a time and recalculation of the overall effect and heterogeneity*

CI, confidence interval; CRP= C reactive protein; HD= higher dose; LD= lower dose

**Supplemental Figure S33: Sensitivity analysis of the systematic removal of each trial for the effect of sweets and desserts on CRP (mg/L) in addition trials**

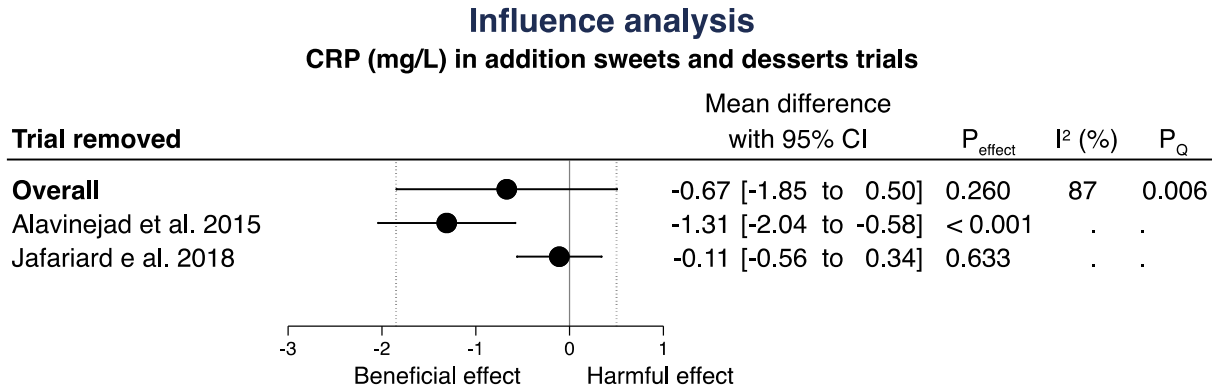

*Influence analysis: removal of each trial, one at a time and recalculation of the overall effect and heterogeneity*

CI, confidence interval; CRP= C reactive protein

**Supplemental Figure S34: Sensitivity analysis of the systematic removal of each trial for the effect of important food sources of fructose-containing sugars on TNF-α (pg/mL) in substitution trials**

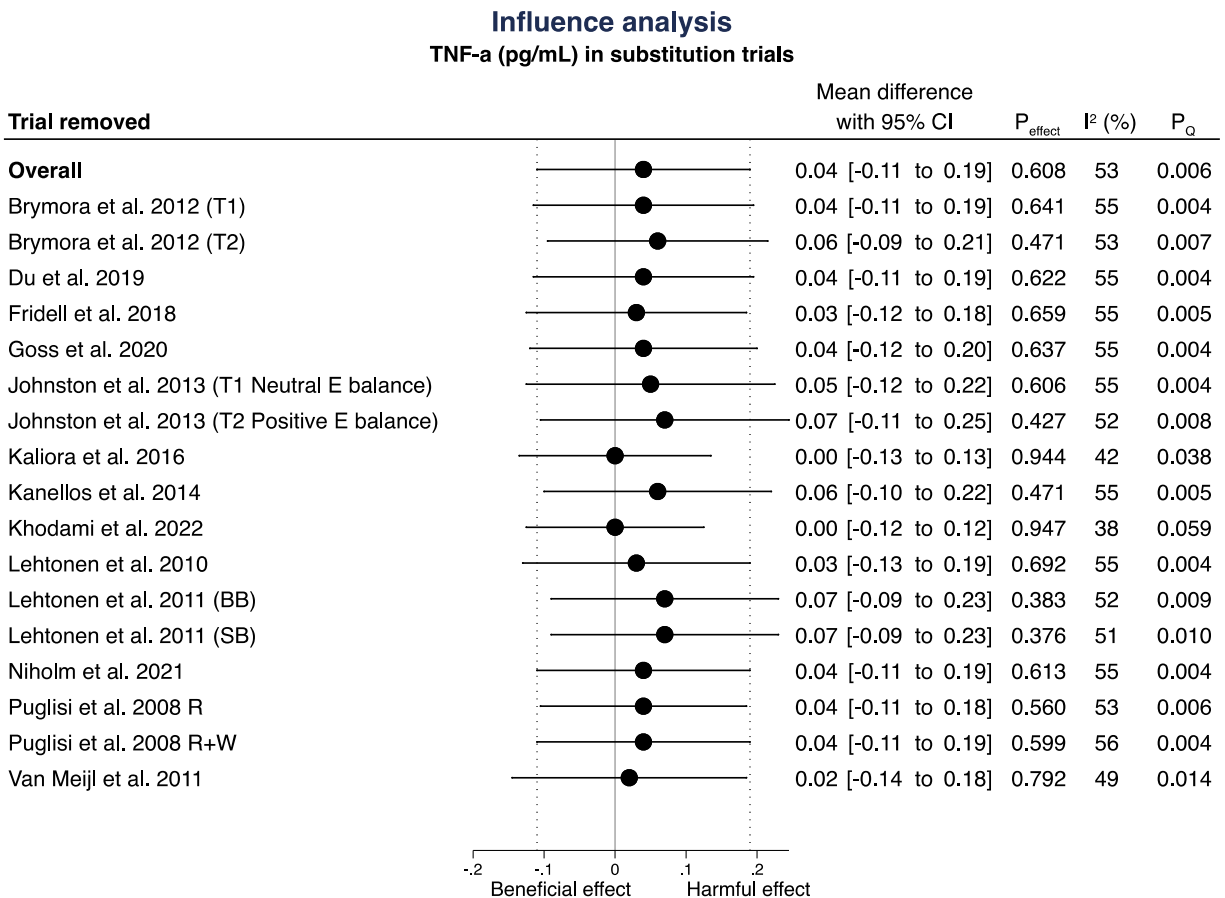

*Influence analysis: removal of each trial, one at a time and recalculation of the overall effect and heterogeneity*

CI, confidence interval; BB= Bilberries; SB= sea buckthorn berries; R= Raisin; R+W= Raisin + Walk; T1= Test 1; T2= Test 2; TNF-α= tumour necrosis factor alpha

**Supplemental Figure S35: Sensitivity analysis of the systematic removal of each trial for the effect of important food sources of fructose-containing sugars on TNF- $\alpha$  (pg/mL) in addition trials**

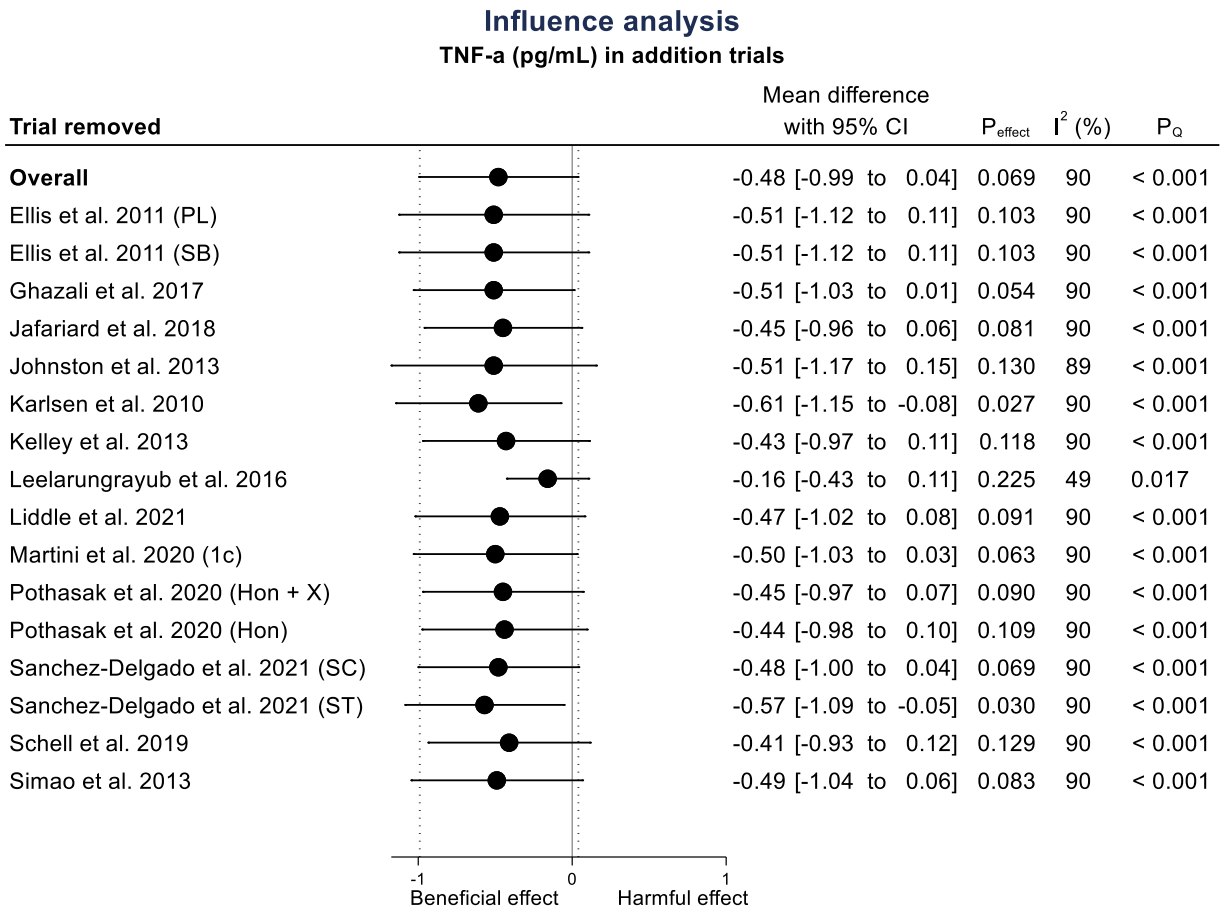

*Influence analysis: removal of each trial, one at a time and recalculation of the overall effect and heterogeneity*

CI, confidence interval; Hon= Honey; Hon + X = Honey + exercise; PL= Placebo; SB= Strawberries; SC= sucralose; ST= steviol; TNF- $\alpha$ = Tumour necrosis factor-alpha; 1c= 1 cup

**Supplemental Figure S36: Sensitivity analysis of the systematic removal of each trial for the effect of SSB on TNF-a (pg/mL) in addition trials**

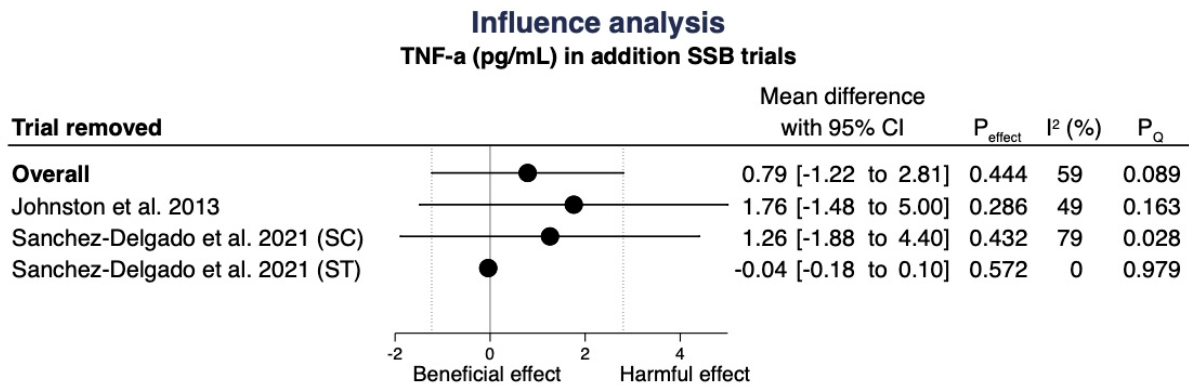

*Influence analysis: removal of each trial, one at a time and recalculation of the overall effect and heterogeneity*

CI, confidence interval; TNF-a = tumour necrosis factor-alpha

**Supplemental Figure S37: Sensitivity analysis of the systematic removal of each trial for the effect of sweetened dairy on TNF-a (pg/mL) in addition trials**

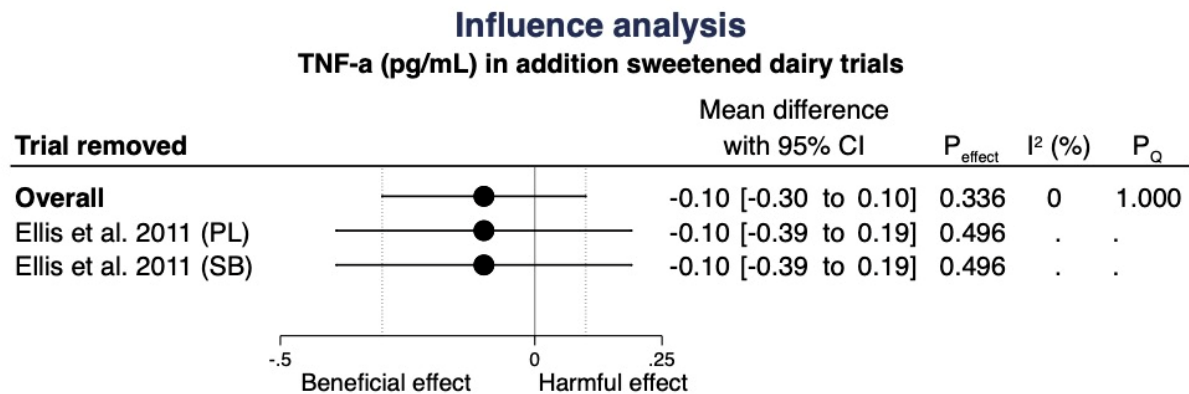

*Influence analysis: removal of each trial, one at a time and recalculation of the overall effect and heterogeneity*

CI, confidence interval; TNF-a = tumour necrosis factor-alpha

**Supplemental Figure S38: Sensitivity analysis of the systematic removal of each trial for the effect of 100% fruit juice on TNF-a (pg/mL) in addition trials**

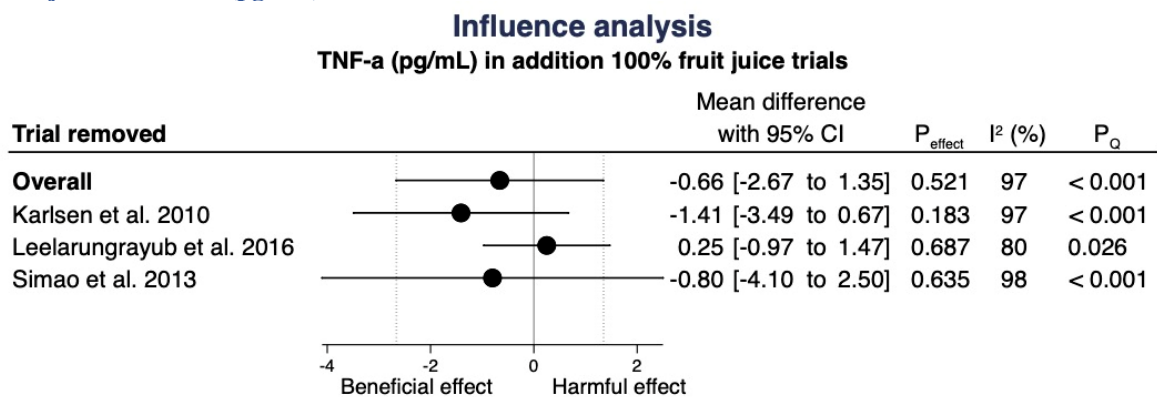

*Influence analysis: removal of each trial, one at a time and recalculation of the overall effect and heterogeneity*

CI, confidence interval; TNF-a = tumour necrosis factor-alpha



**Supplemental Figure S39: Sensitivity analysis of the systematic removal of each trial for the effect of fruit on TNF-a (pg/mL) in addition trials**

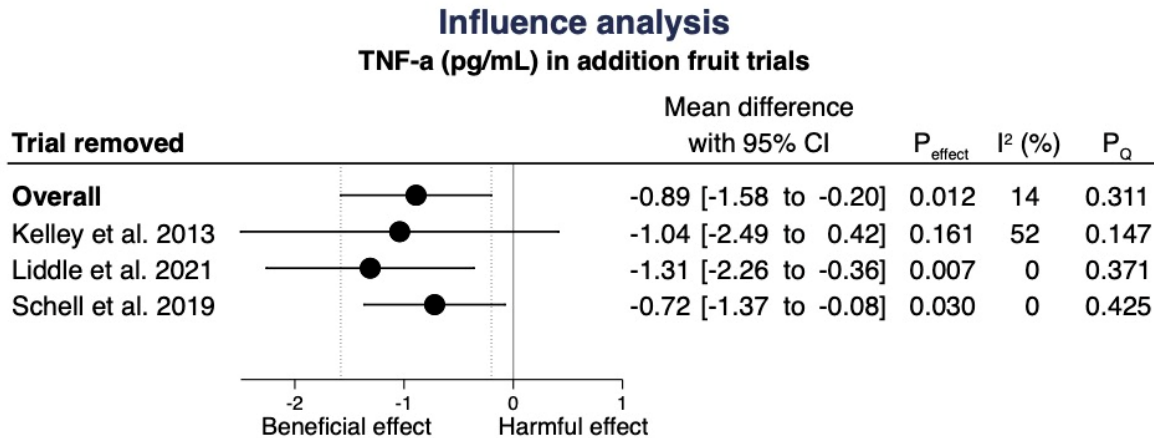

*Influence analysis: removal of each trial, one at a time and recalculation of the overall effect and heterogeneity*

CI, confidence interval; TNF-a = tumour necrosis factor-alpha

**Supplemental Figure S40: Sensitivity analysis of the systematic removal of each trial for the effect of addition sweets and desserts on TNF-a (pg/mL) in addition trials**

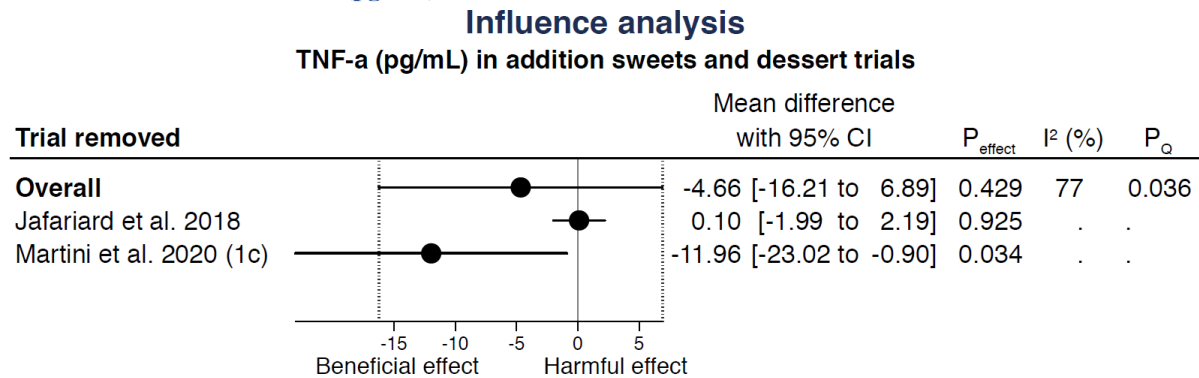

*Influence analysis: removal of each trial, one at a time and recalculation of the overall effect and heterogeneity*

CI, confidence interval; TNF-a = tumour necrosis factor-alpha; 1c = 1 cup

**Supplemental Figure S41: Sensitivity analysis of the systematic removal of each trial for the effect of added nutritive (caloric) sweeteners on TNF-a (pg/mL) in addition trials**

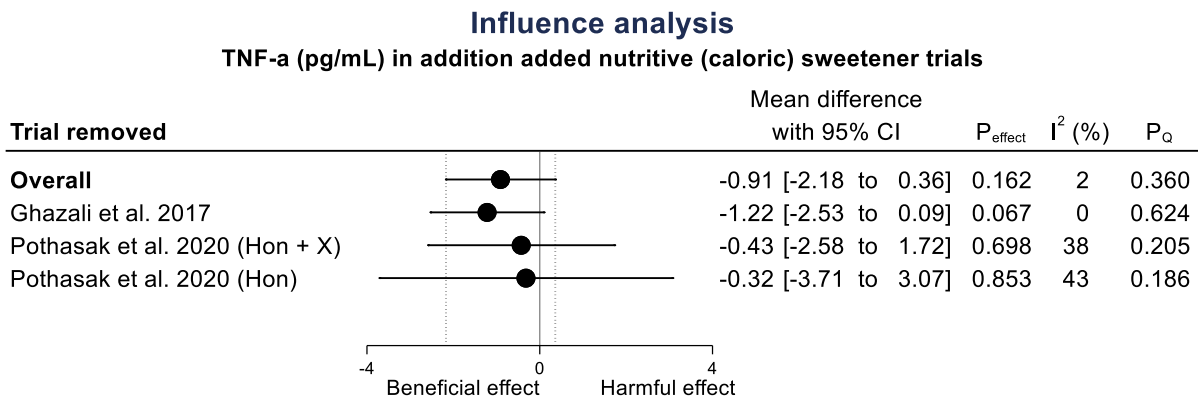

*Influence analysis: removal of each trial, one at a time and recalculation of the overall effect and heterogeneity*

CI, confidence interval; TNF-a = tumour necrosis factor-alpha

**Supplemental Figure S42: Sensitivity analysis of the systematic removal of each trial for the effect of important food sources of fructose-containing sugars on IL-6 (pg/mL) in substitution trials.**

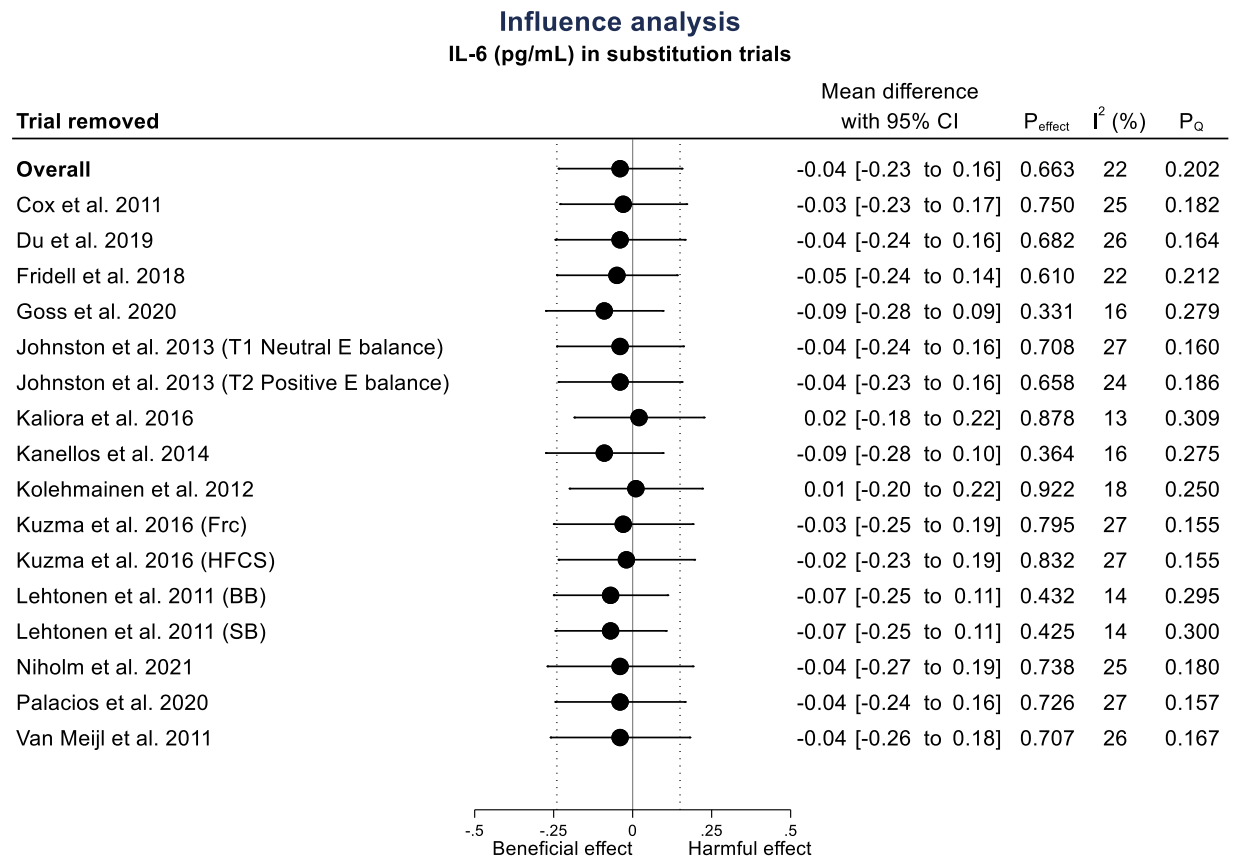

*Influence analysis: removal of each trial, one at a time and recalculation of the overall effect and heterogeneity*

CI=confidence interval; IL-6= Interleukin-6; Frc= fructose; HFCS= High fructose corn syrup; BB= Bilberries; SB= Sea buckthorn berries; T1= Test 1; T2= Test 2

**Supplemental Figure S43: Sensitivity analysis of the systematic removal of each trial for the effect of important food sources of fructose-containing sugars on IL-6 (pg/mL) on addition trials**

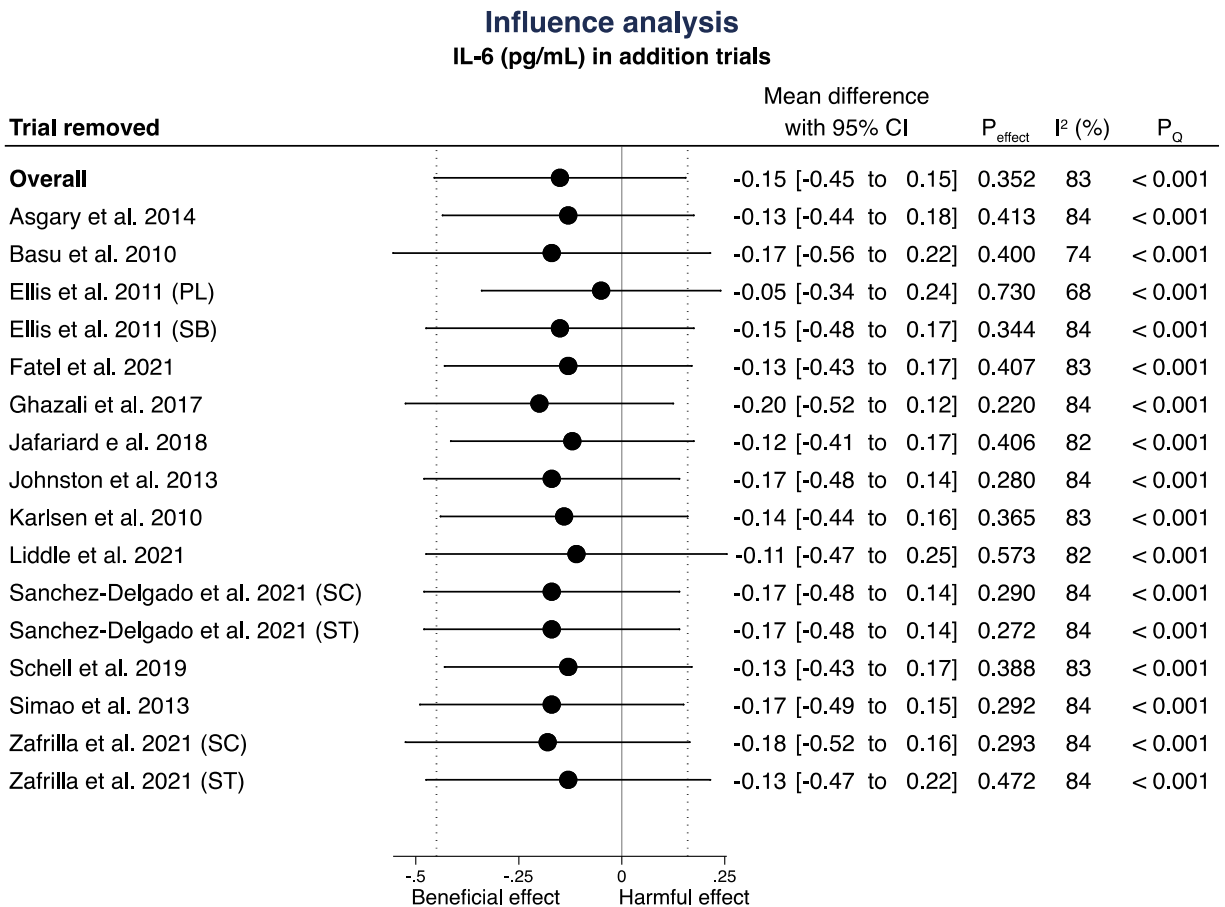

*Influence analysis: removal of each trial, one at a time and recalculation of the overall effect and heterogeneity*

CI=confidence interval; IL-6= Interleukin-6; PL= Placebo; SB= Strawberries; SC= sucralose; ST= steviol

**Supplemental Figure S44: Sensitivity analysis of the systematic removal of each trial for the effect of SSB on IL-6 (pg/mL) in addition trials**

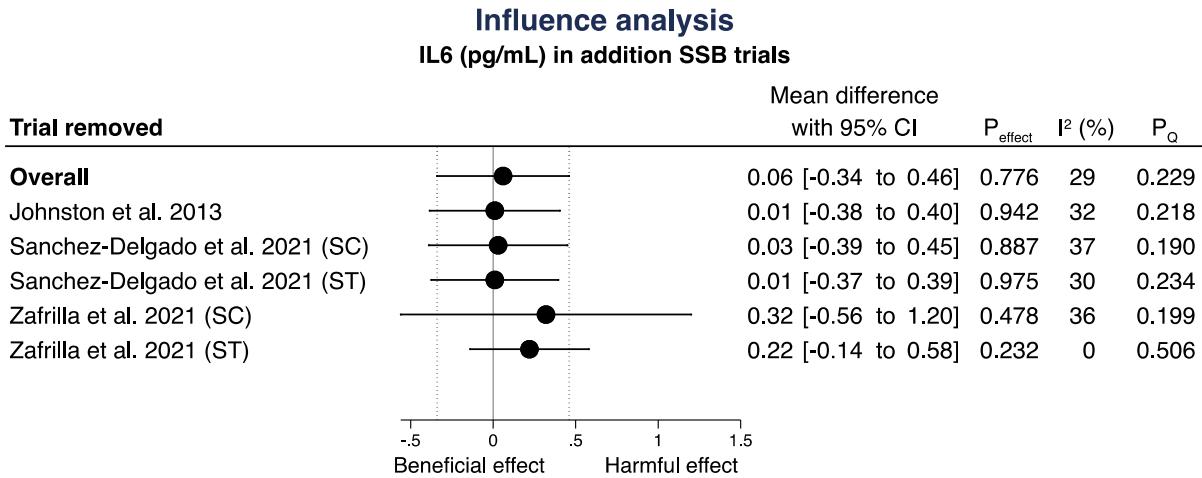

*Influence analysis: removal of each trial, one at a time and recalculation of the overall effect and heterogeneity*

CI=confidence interval; IL6= interleukin-6; SC= sucralose; ST= steviol; SSB= sugar sweetened beverage

**Supplemental Figure S45: Sensitivity analysis of the systematic removal of each trial for the effect of sweetened dairy on IL-6 (pg/mL) in addition trials**

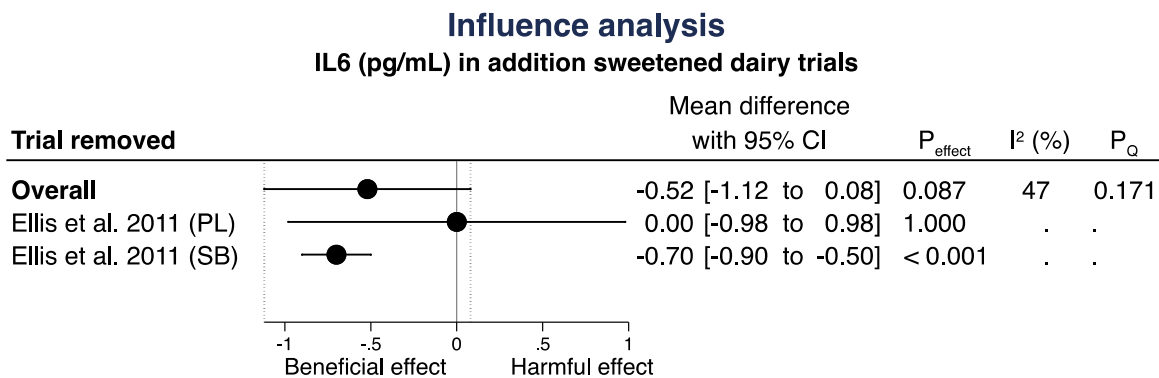

*Influence analysis: removal of each trial, one at a time and recalculation of the overall effect and heterogeneity*

CI=confidence interval; IL6= interleukin-6; PL= placebo; SB= strawberries

**Supplemental Figure S46: Sensitivity analysis of the systematic removal of each trial for the effect of 100% fruit juice on IL-6 (pg/mL) in addition trials**

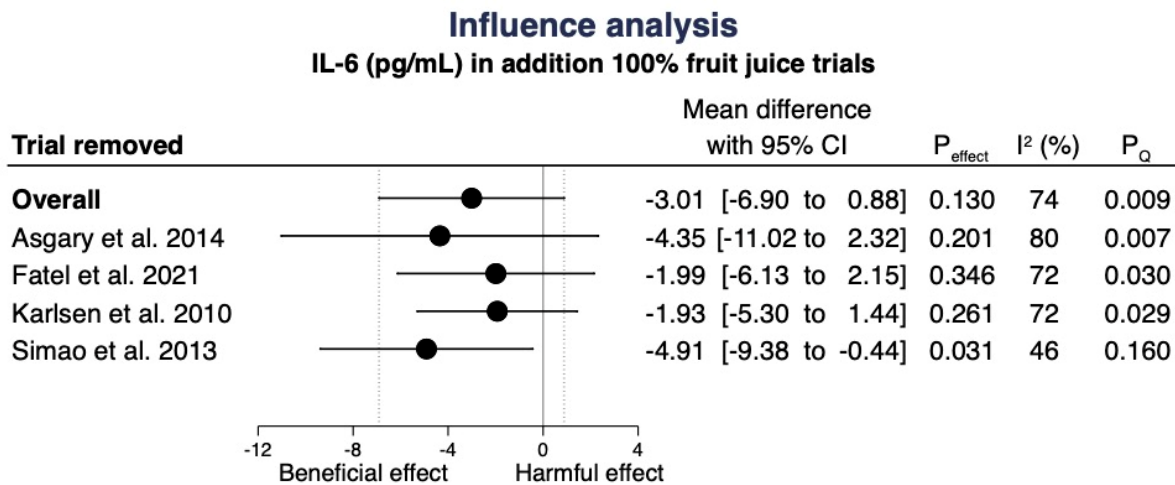

*Influence analysis: removal of each trial, one at a time and recalculation of the overall effect and heterogeneity*

CI=confidence interval; IL-6= interleukin-6

**Supplemental Figure S47: Sensitivity analysis of the systematic removal of each trial for the effect of fruit on IL-6 (pg/mL) in addition trials**

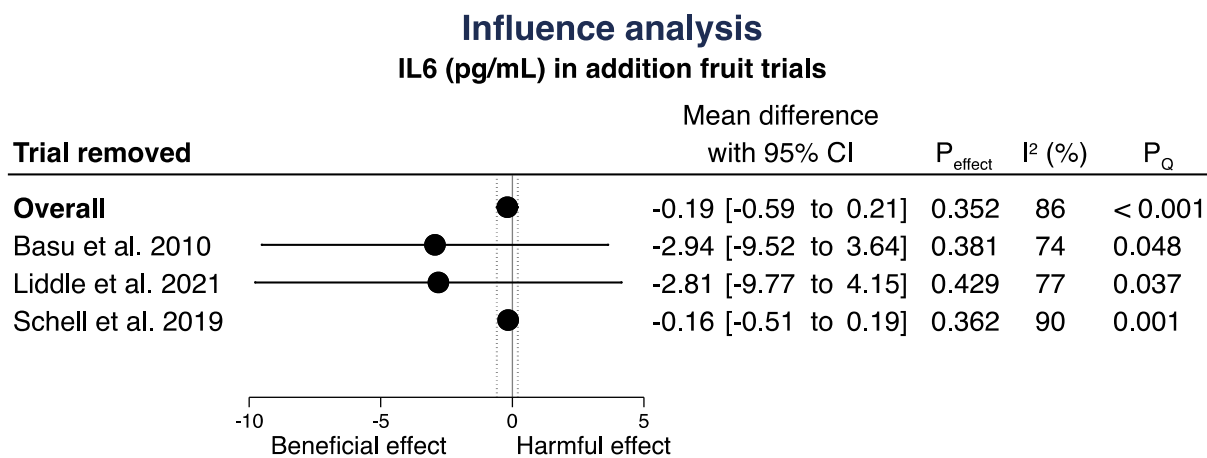

*Influence analysis: removal of each trial, one at a time and recalculation of the overall effect and heterogeneity*

CI=confidence interval; IL6= interleukin 6

**Supplemental Figure S48 (part 1 of 3): Subgroup analyses for the effect of important food sources of fructose-containing sugars on CRP (mg/L) in substitution trials**

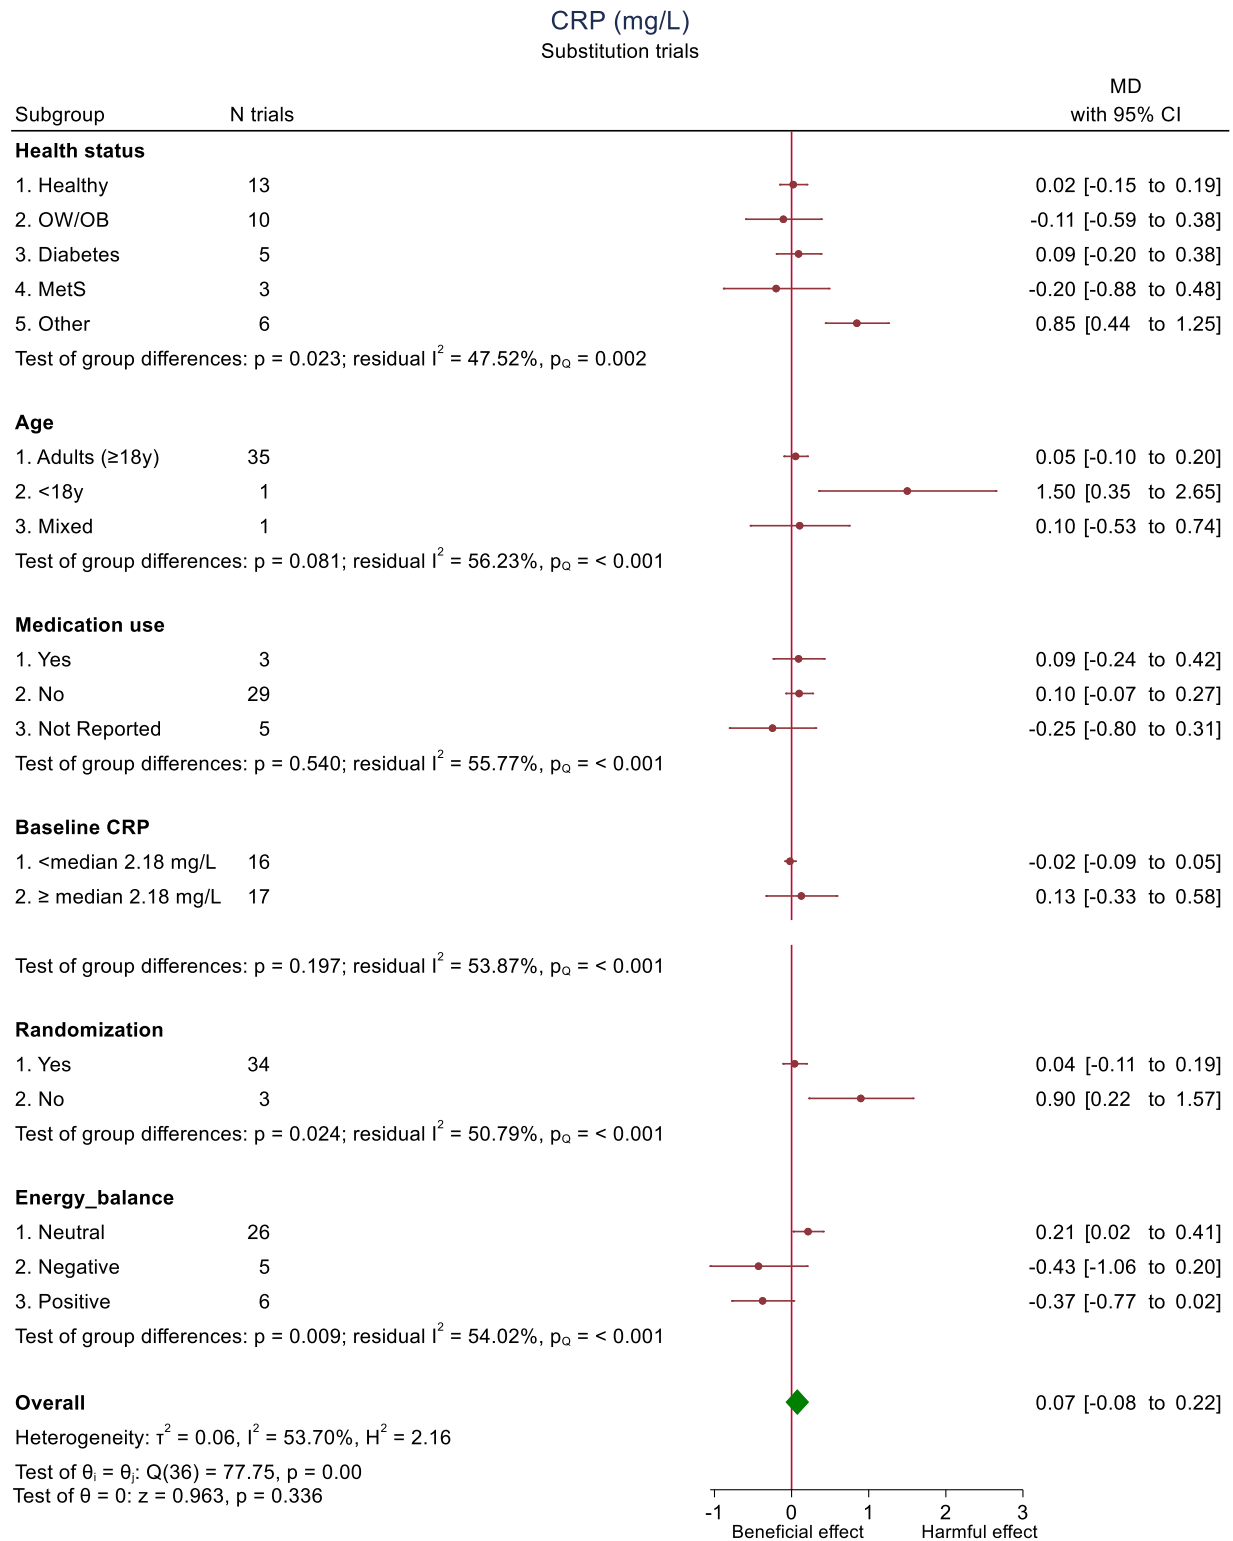

CI=confidence interval; CRP = C reactive protein ; het=heterogeneity; MD= mean difference; MetS= metabolic syndrome; OW/OB=overweight or obese; y=years

\*N=4 trials missing data for baseline CRP

The green diamond represents the pooled estimate for the overall primary analysis of food sources of fructose-containing sugars and CRP. Within subgroup mean differences are the pooled effect estimates represented by a red circle. 95% confidence intervals are represented by the line through the circle. Data are expressed as mean differences with 95% confidence intervals using the generic inverse-variance method and random effects DerSimonian-Laird model. Inter-study heterogeneity was assessed using the Cochrane Q statistic and quantified using the  $I^2$  statistic, with significance set at  $P_Q < 0.100$  and  $I^2 \geq 50\%$  considered to be evidence of substantial heterogeneity.  $P < 0.050$  indicates that the effect size differed between levels of the subgroup.

# Supplemental Figure S48 (part 2 of 3): Subgroup analyses for the effect of important food sources of fructose-containing sugars on CRP (mg/L) in substitution trials

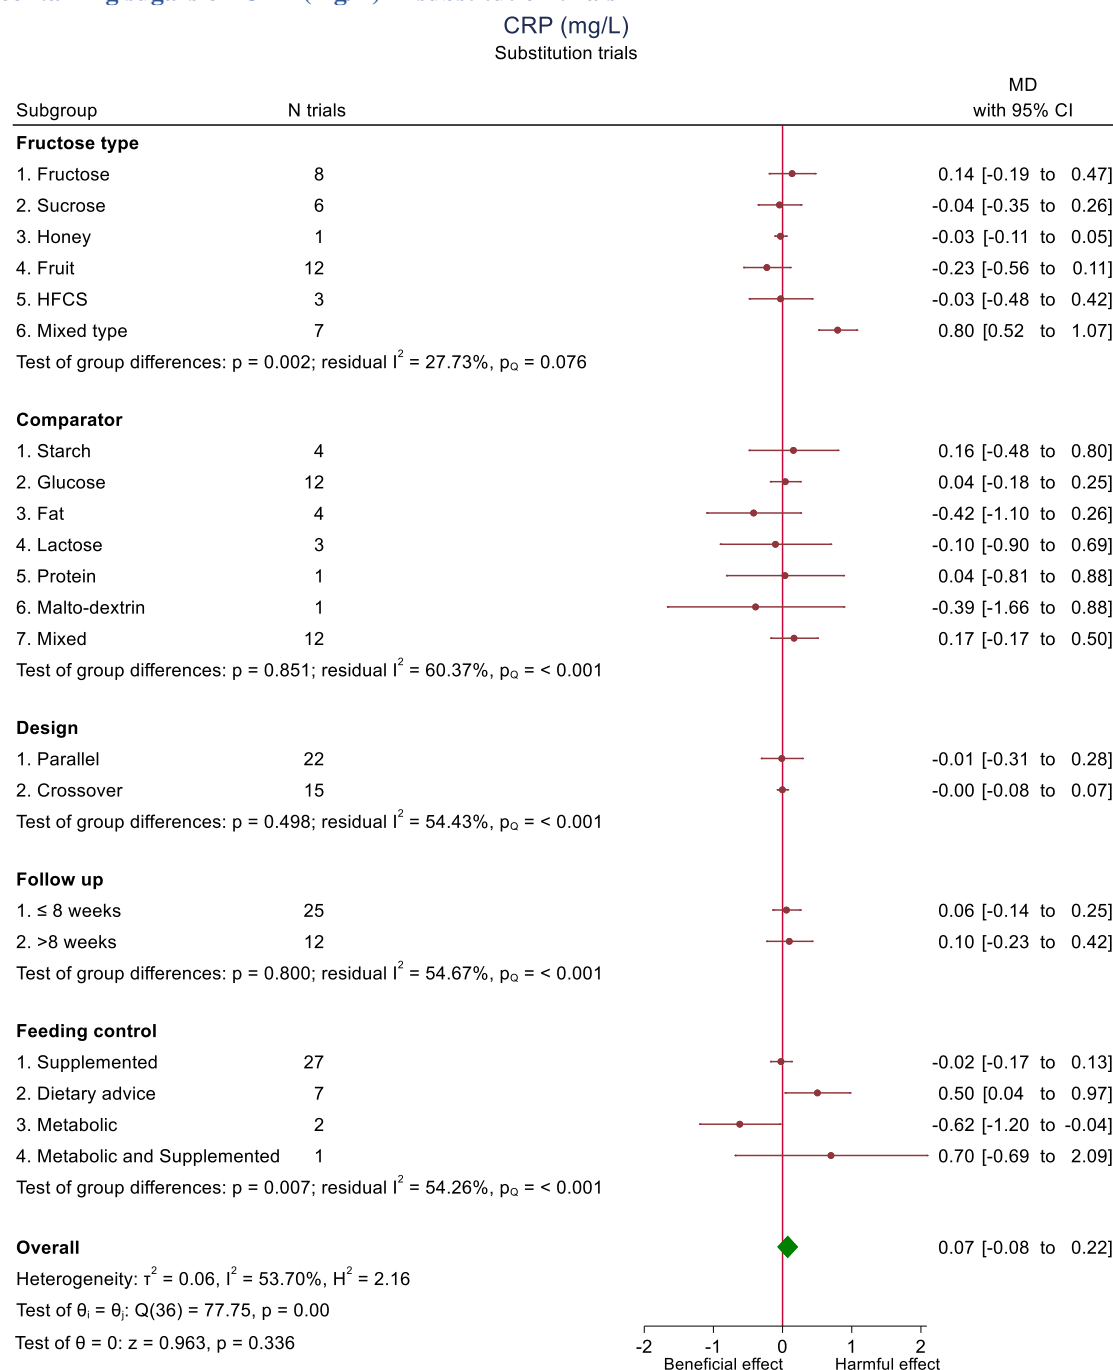

CI=confidence interval; CRP = C reactive protein; HFCS = High fructose corn syrup; MD= mean difference  
The green diamond represents the pooled estimate for the overall primary analysis of food sources of fructose-containing sugars and CRP. Within subgroup mean differences are the pooled effect estimates represented by a red circle. 95% confidence intervals are represented by the line through the circle. Data are expressed as mean differences with 95% confidence intervals using the generic inverse-variance method and random effects DerSimonian-Laird model. Inter-study heterogeneity was assessed using the Cochrane Q statistic and quantified using the  $I^2$  statistic, with significance set at  $P_Q < 0.100$  and  $I^2 \geq 50\%$  considered to be evidence of substantial heterogeneity.  $P < 0.050$  indicates that the effect size differed between levels of the subgroup.



**Supplemental Figure S48 (part 3 of 3): Subgroup analyses for the effect of important food sources of fructose-containing sugars on CRP (mg/L) in substitution trials**

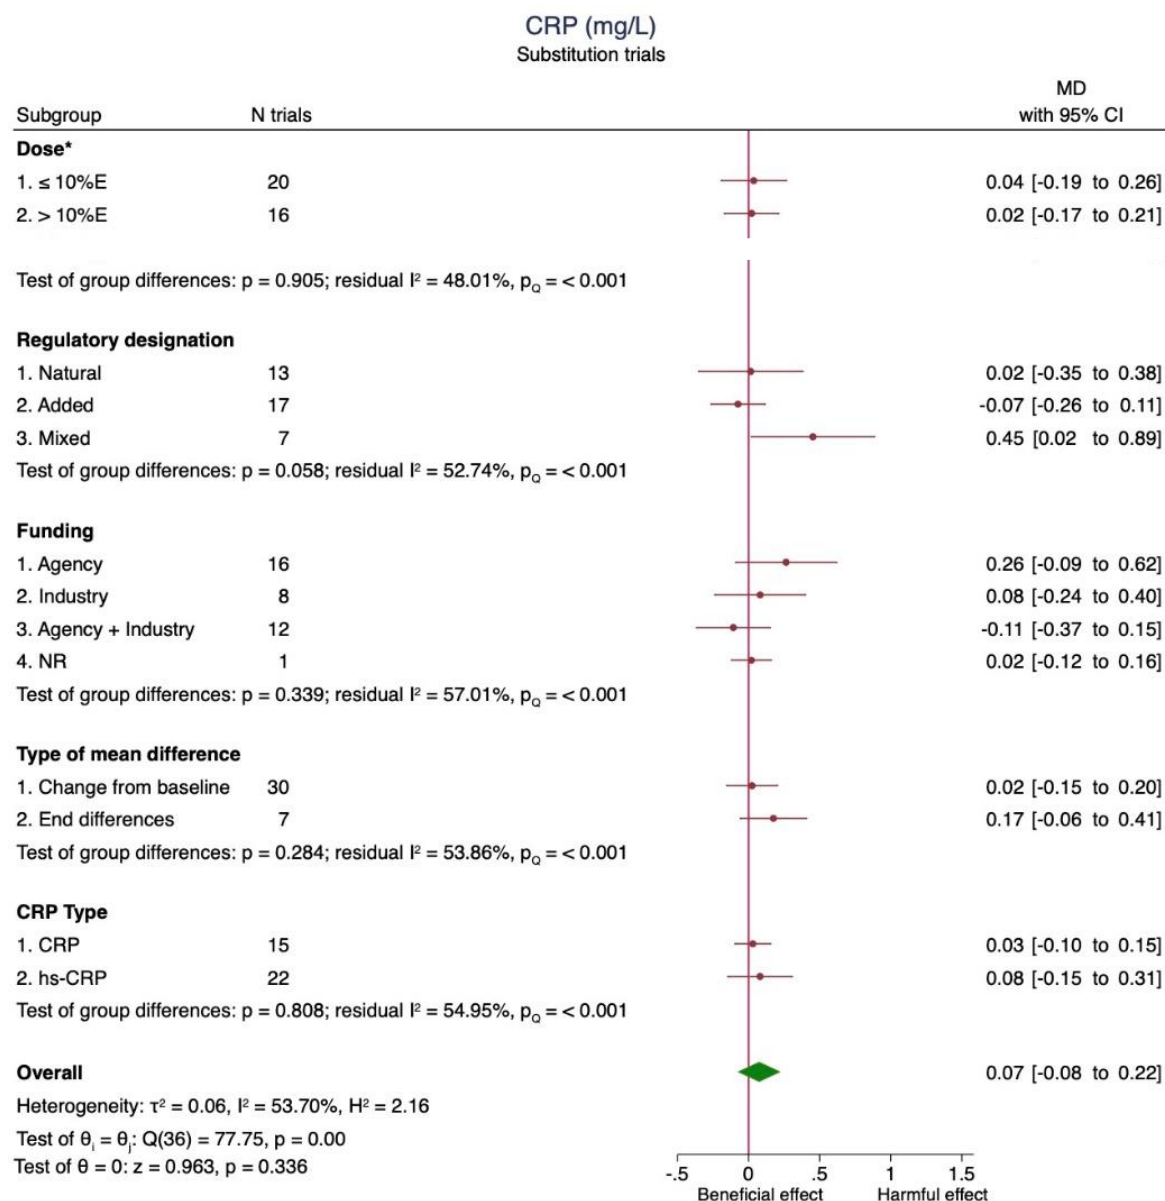

CI=confidence interval; CRP = C reactive protein; E= Energy; MD= mean difference; NR= not reported  
The green diamond represents the pooled estimate for the overall primary analysis of food sources of fructose-containing sugars and CRP. Within subgroup mean differences are the pooled effect estimates represented by a red circle. 95% confidence intervals are represented by the line through the circle. Data are expressed as mean differences with 95% confidence intervals using the generic inverse-variance method and random effects DerSimonian-Laird model. Inter-study heterogeneity was assessed using the Cochrane Q statistic and quantified using the  $I^2$  statistic, with significance set at  $P_Q < 0.100$  and  $I^2 \geq 50\%$  considered to be evidence of substantial heterogeneity.  $P < 0.050$  indicates that the effect size differed between levels of the subgroup.

**Supplemental Figure S49: Risk of bias (using The Cochrane Collaboration Tool) subgroup analysis for the effect of important food sources of fructose-containing sugars on CRP (mg/L) in substitution comparisons**

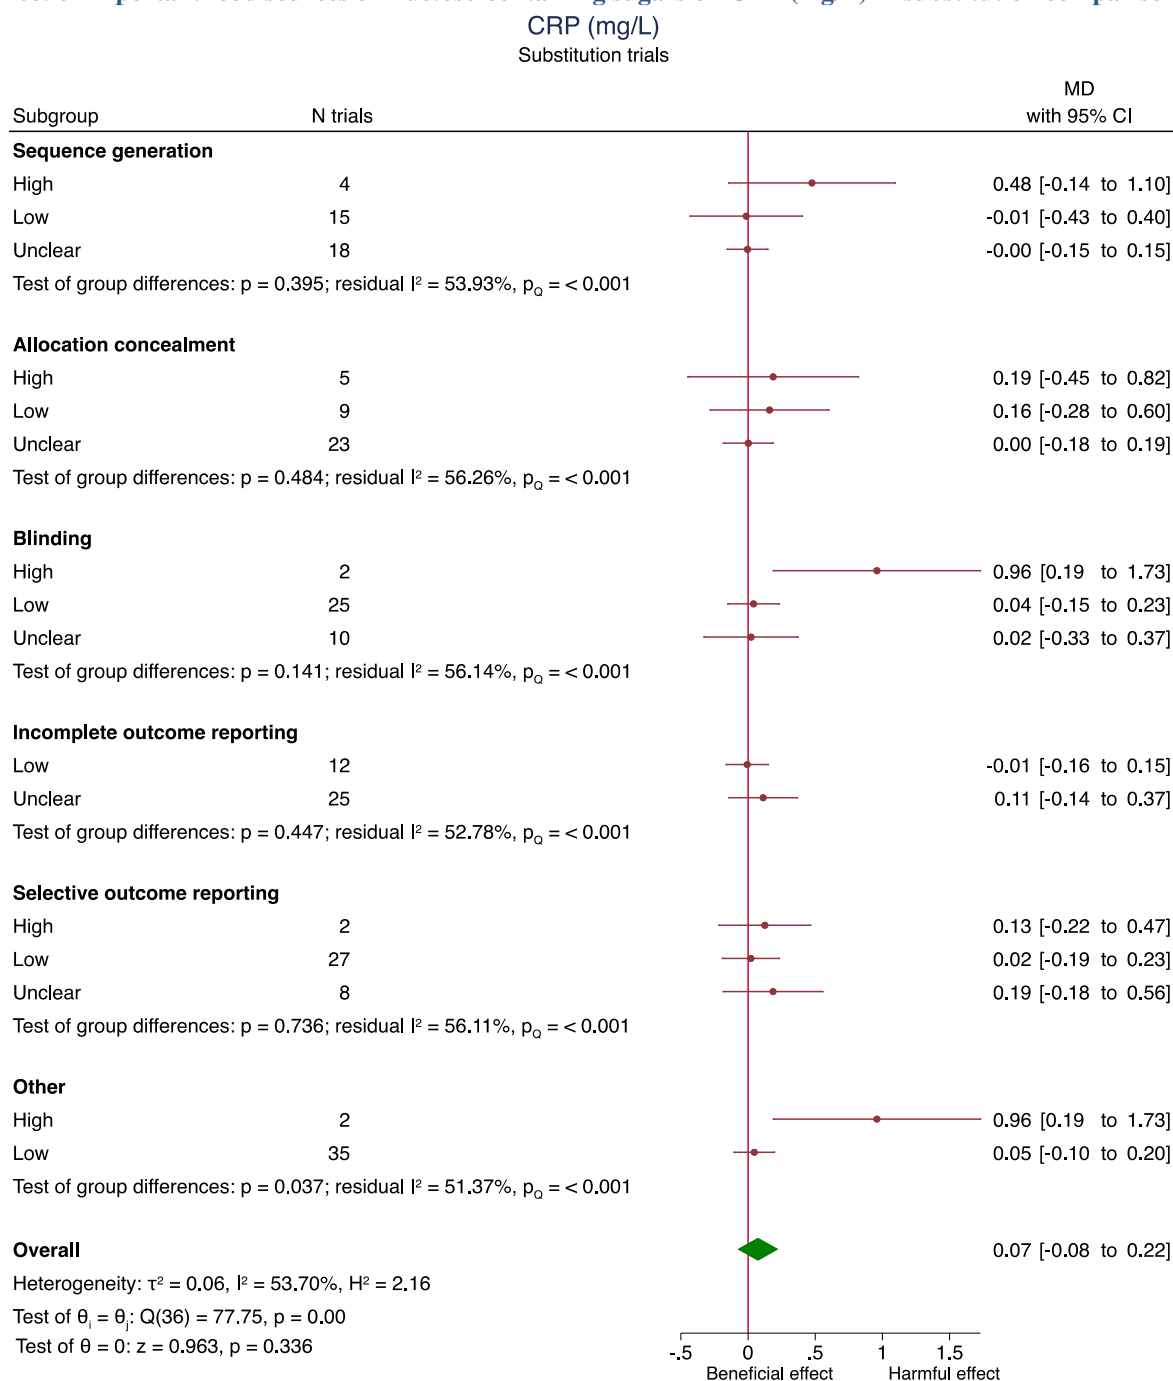

CI=confidence interval; CRP = C reactive protein; MD= mean difference

The green diamond represents the pooled estimate for the overall primary analysis of food sources of fructose-containing sugars and CRP. Within subgroup mean differences are the pooled effect estimates represented by a red circle. 95% confidence intervals are represented by the line through the circle. Data are expressed as mean differences with 95% confidence intervals using the generic inverse-variance method and random effects DerSimonian-Laird model. Inter-study heterogeneity was assessed using the Cochrane Q statistic and quantified using the  $I^2$  statistic, with significance set at  $P_Q < 0.100$  and  $I^2 \geq 50\%$  considered to be evidence of substantial heterogeneity.  $P < 0.050$  indicates that the effect size differed between levels of the subgroup.

# Supplemental Figure S50 (part 1 of 3): Subgroup analyses for the effect of important food sources of fructose-containing sugars on CRP (mg/L) in addition trials

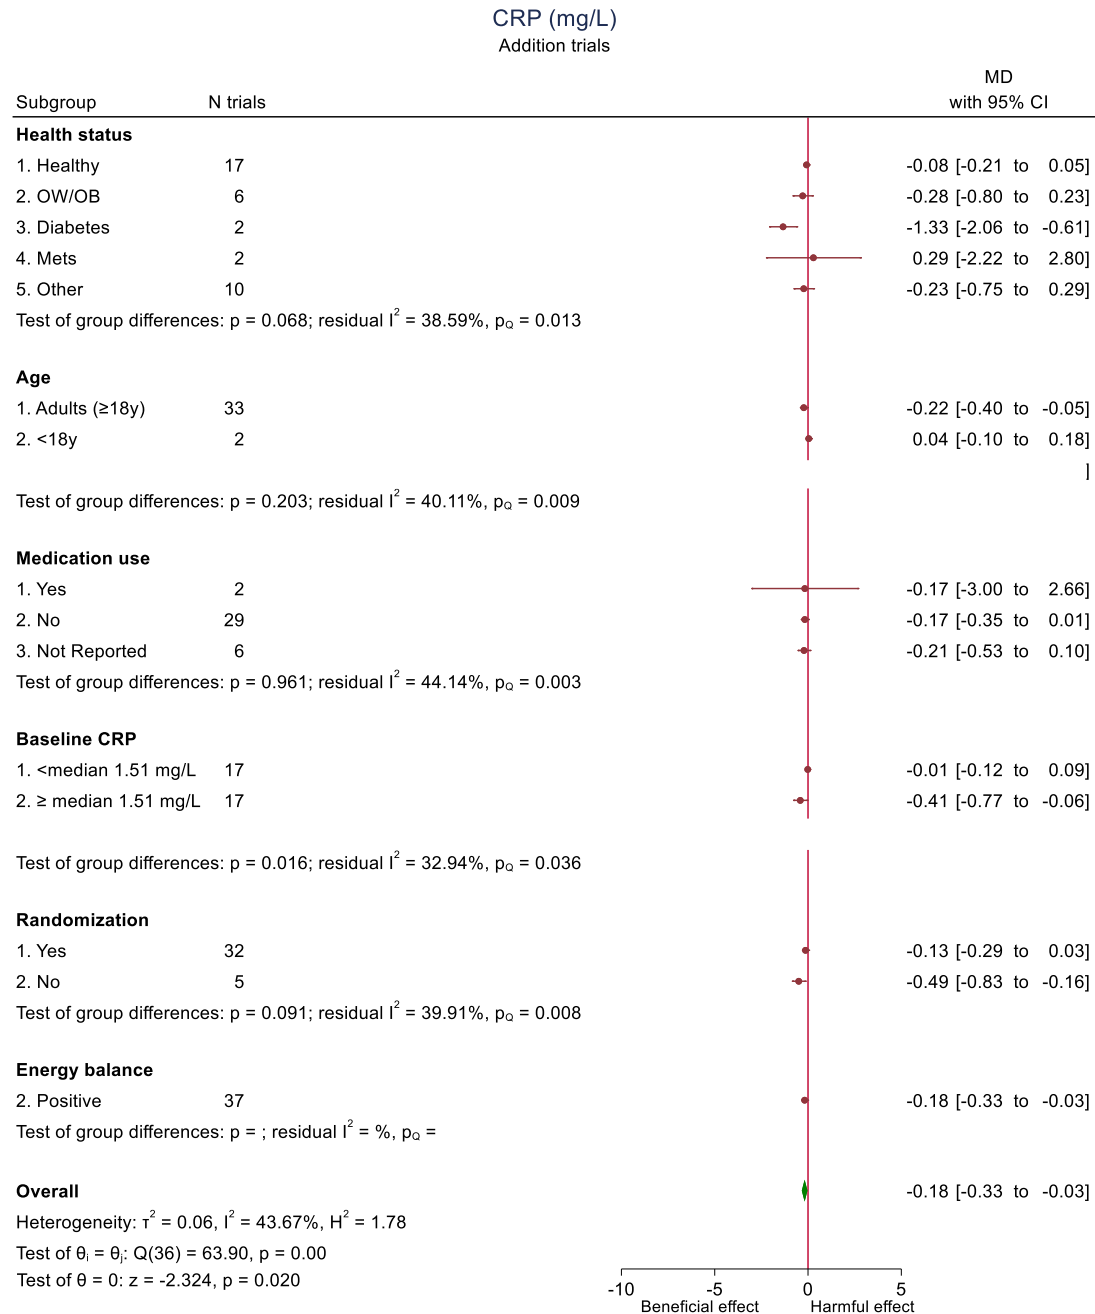

CI=confidence interval; CRP = C reactive protein; OW/OB=overweight or obese BMI; MD= mean difference

\*N= 2 trials missing data for age in addition CRP trials

\*\*N=4 trials missing data for baseline CRP

The green diamond represents the pooled estimate for the overall primary analysis of food sources of fructose-containing sugars and CRP. Within subgroup mean differences are the pooled effect estimates represented by a red circle. 95% confidence intervals are represented by the line through the circle. Data are expressed as mean differences with 95% confidence intervals using the generic inverse-variance method and random effects DerSimonian-Laird model. Inter-study heterogeneity was assessed using the Cochrane Q statistic and quantified using the  $I^2$  statistic, with significance set at  $P_Q < 0.100$  and  $I^2 \geq 50\%$  considered to be evidence of substantial heterogeneity.  $P < 0.050$  indicates that the effect size differed between levels of the subgroup.

**Supplemental Figure S50 (part 2 of 3): Subgroup analyses for the effect of important food sources of fructose-containing sugars on CRP (mg/L) in addition comparisons**

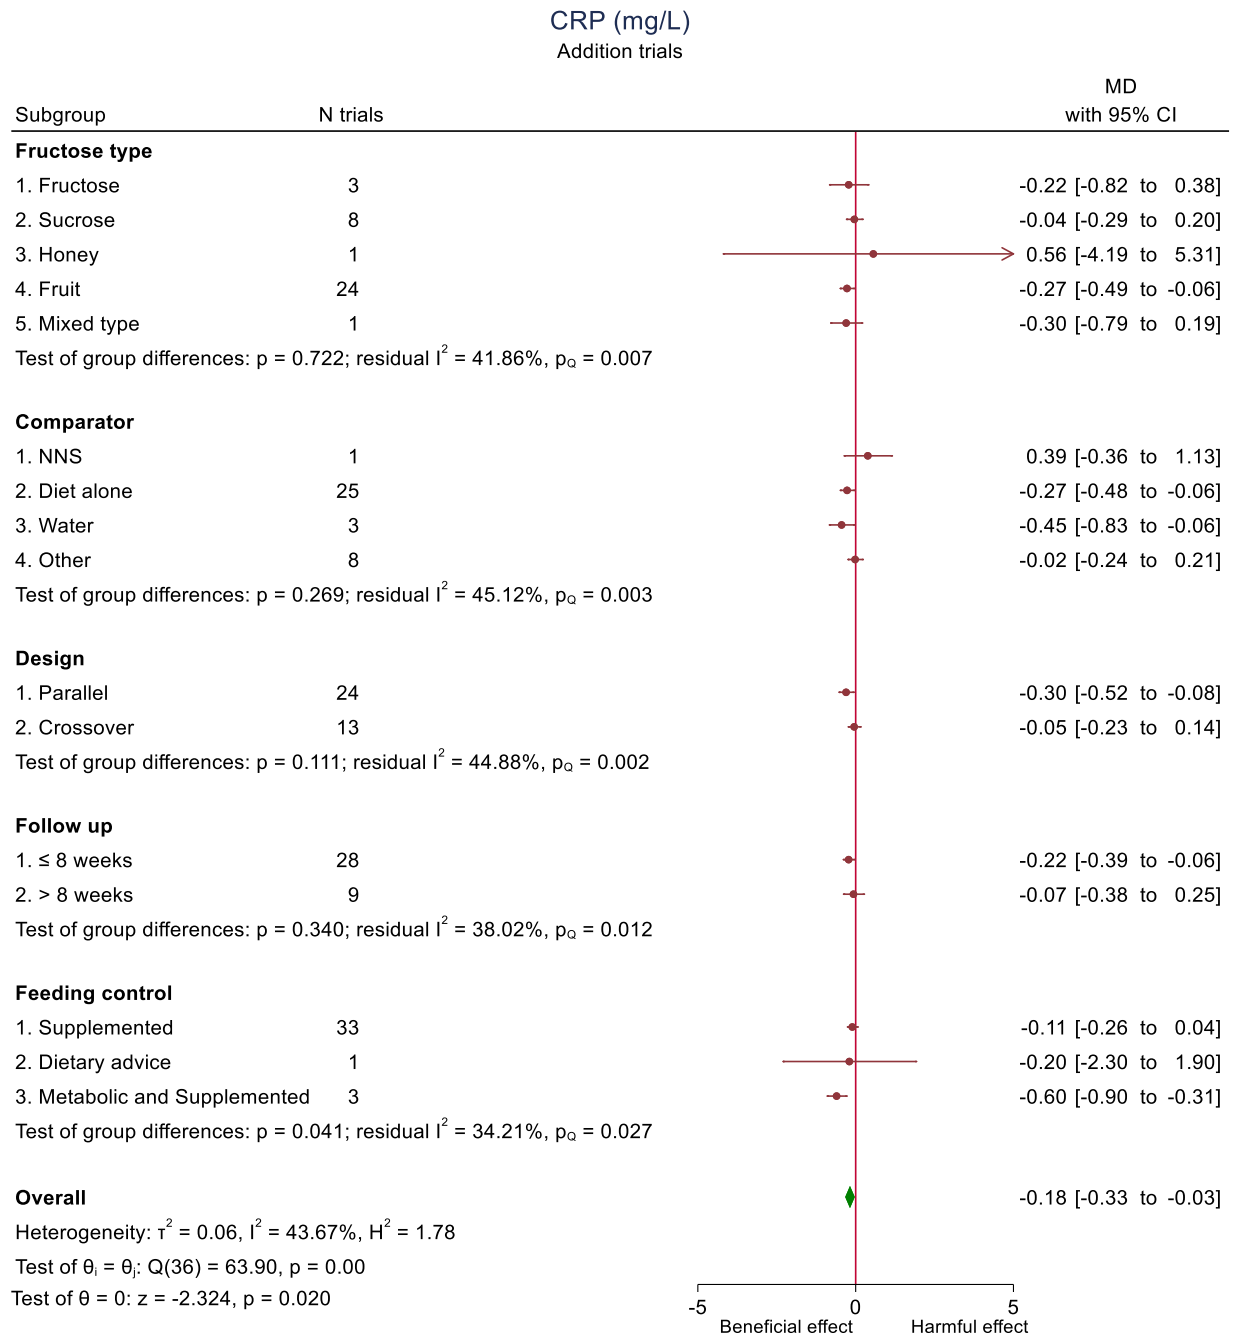

CI=confidence interval; CRP = C reactive protein ; MD= mean difference; NNS= non nutritive sweetener; The green diamond represents the pooled estimate for the overall primary analysis of food sources of fructose-containing sugars and CRP. Within subgroup mean differences are the pooled effect estimates represented by a red circle. 95% confidence intervals are represented by the line through the circle. Data are expressed as mean differences with 95% confidence intervals using the generic inverse-variance method and random effects DerSimonian-Laird model. Inter-study heterogeneity was assessed using the Cochrane Q statistic and quantified using the  $I^2$  statistic, with significance set at  $P_Q < 0.100$  and  $I^2 \geq 50\%$  considered to be evidence of substantial heterogeneity.  $P < 0.050$  indicates that the effect size differed between levels of the subgroup.

**Supplemental Figure S50 (part 3 of 3): Subgroup analyses for the effect of important food sources of fructose-containing sugars on CRP (mg/L) in addition comparisons**

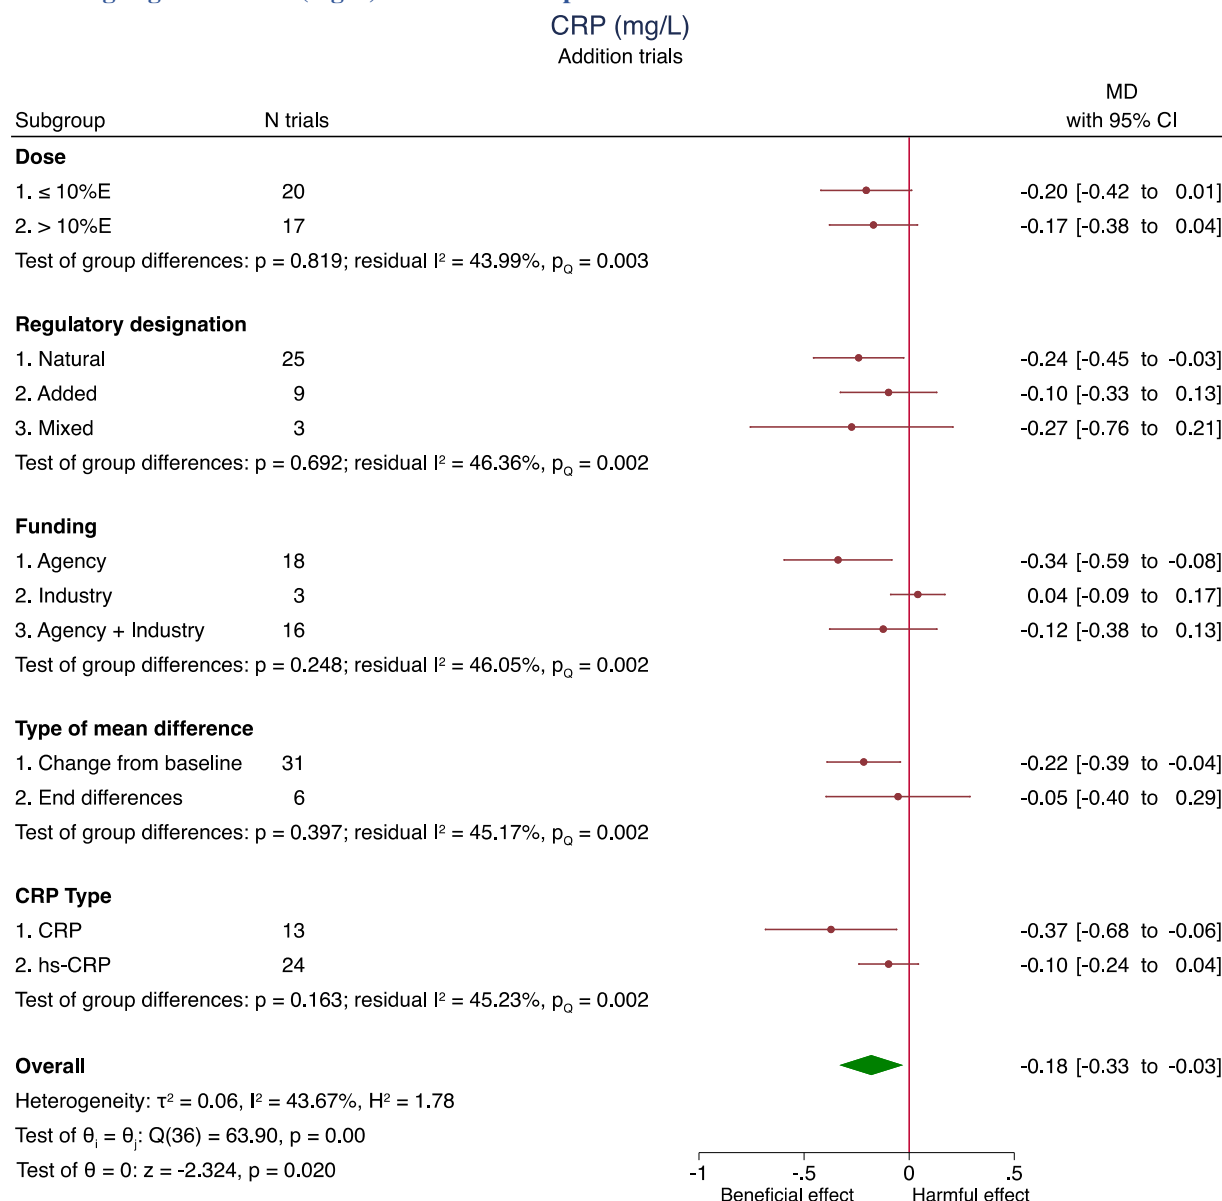

CI=confidence interval; CRP= C reactive protein; E= energy; MD= mean difference

The green diamond represents the pooled estimate for the overall primary analysis of food sources of fructose-containing sugars and CRP. Within subgroup mean differences are the pooled effect estimates represented by a red circle. 95% confidence intervals are represented by the line through the circle. Data are expressed as mean differences with 95% confidence intervals using the generic inverse-variance method and random effects DerSimonian-Laird model. Inter-study heterogeneity was assessed using the Cochrane Q statistic and quantified using the  $I^2$  statistic, with significance set at  $P_Q < 0.100$  and  $I^2 \geq 50\%$  considered to be evidence of substantial heterogeneity.  $P < 0.050$  indicates that the effect size differed between levels of the subgroup.

**Supplemental Figure S51: Risk of bias (using The Cochrane Collaboration Tool) subgroup analysis for the effect of important food sources of fructose-containing sugars on CRP (mg/L) in addition trials**

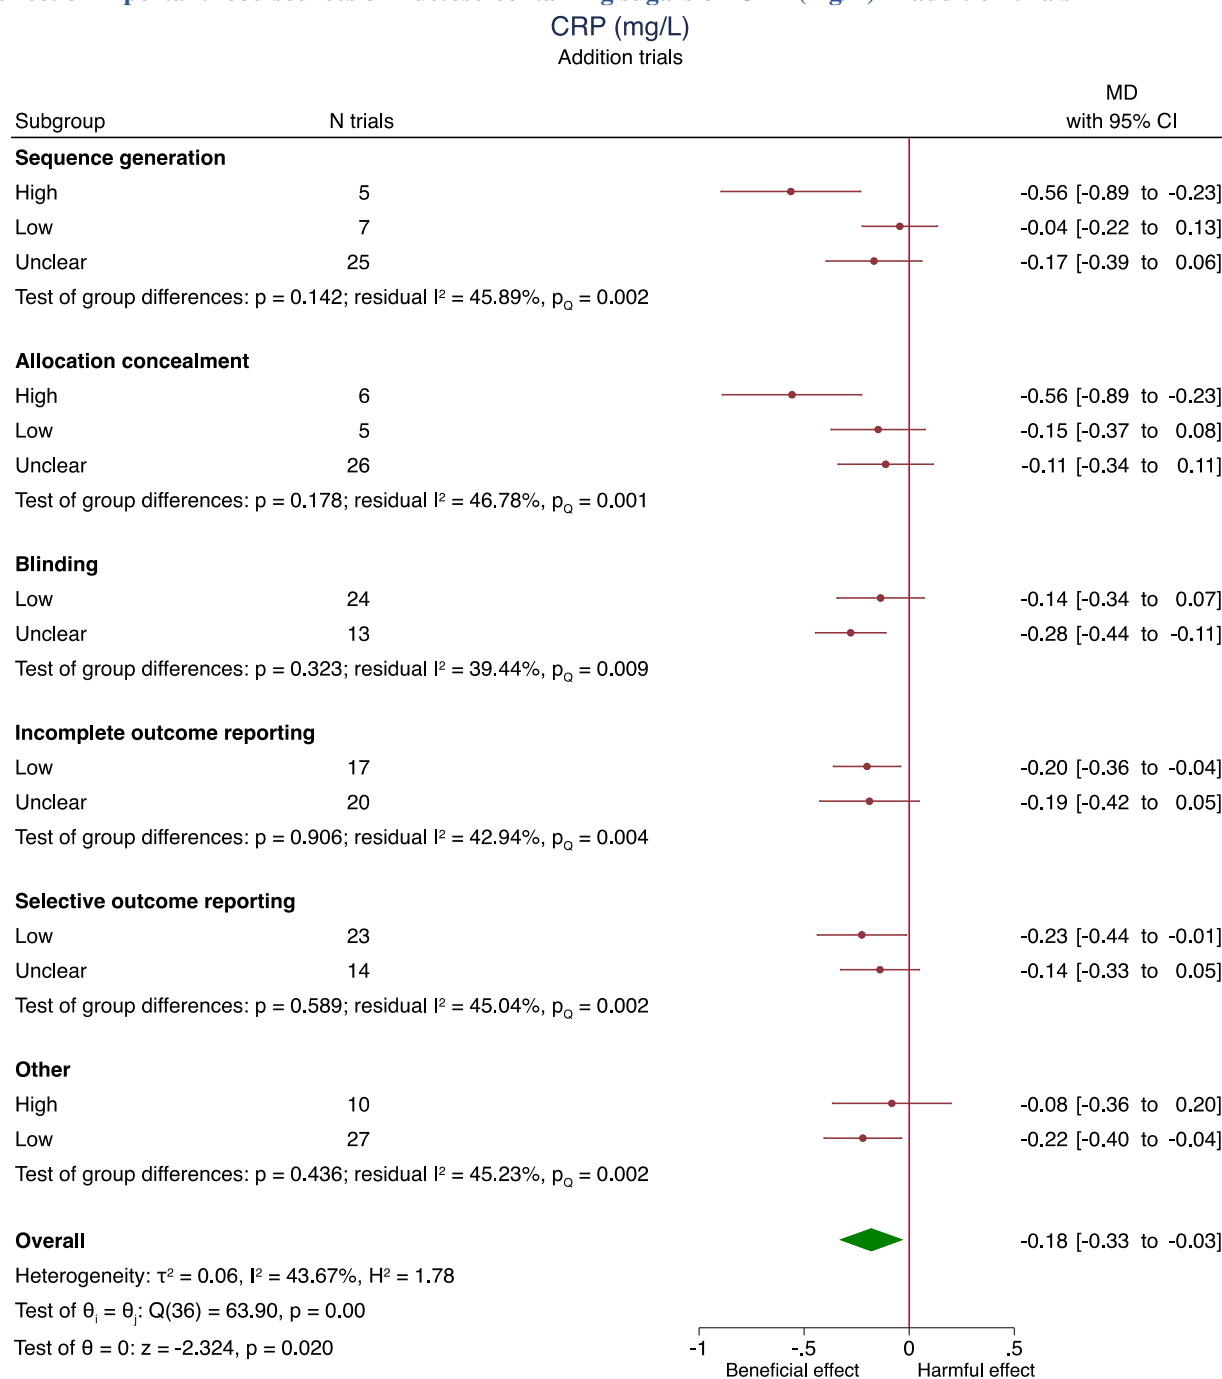

CI=confidence interval; CRP = C reactive protein; MD= mean difference

The green diamond represents the pooled estimate for the overall primary analysis of food sources of fructose-containing sugars and CRP. Within subgroup mean differences are the pooled effect estimates represented by a red circle. 95% confidence intervals are represented by the line through the circle. Data are expressed as mean differences with 95% confidence intervals using the generic inverse-variance method and random effects DerSimonian-Laird model. Inter-study heterogeneity was assessed using the Cochrane Q statistic and quantified using the  $I^2$  statistic, with significance set at  $P_Q < 0.100$  and  $I^2 \geq 50\%$  considered to be evidence of substantial heterogeneity.  $P < 0.050$  indicates that the effect size differed between levels of the subgroup.

**Supplemental Figure S52: Continuous meta-regression analysis for the effect of important food sources of fructose-containing sugars on CRP (mg/L) in substitution trials**

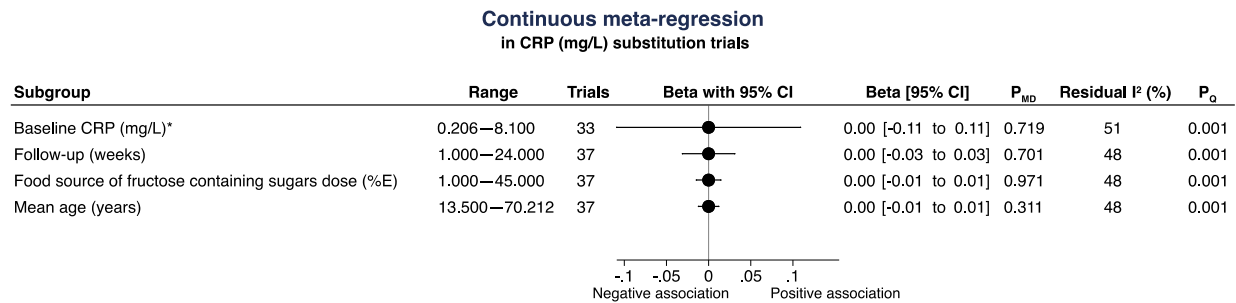

CI=confidence interval; CRP= C reactive protein; %E=percentage of total energy intake;  
Data is presented as between group mean difference (95% confidence intervals) for a 1-unit change in the predictor variable.  $\beta$ -coefficients were estimated using continuous meta-regression analysis. A positive  $\beta$ -coefficient implies an increase in CRP with the food source of fructose-containing sugars intervention as the subgroup variable increases, and a negative  $\beta$ -coefficient implies a decrease in uric acid. Residual I<sup>2</sup> reports inter-study heterogeneity not explained by the subgroup and was estimated using the Cochrane Q statistic.

\*N=4 trials missing data for baseline CRP

**Supplemental Figure S53: Continuous meta-regression analysis for the effect of important food sources of fructose-containing sugars on CRP (mg/L) in addition trials**

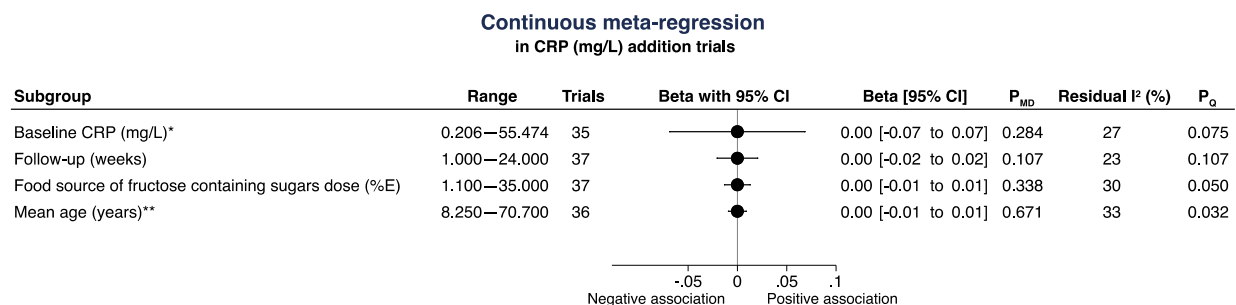

CI=confidence interval; CRP= C reactive protein; %E=percentage of total energy intake;  
Data is presented as between group mean difference (95% confidence intervals) for a 1-unit change in the predictor variable.  $\beta$ -coefficients were estimated using continuous meta-regression analysis. A positive  $\beta$ -coefficient implies an increase in CRP with the food source of fructose-containing sugars intervention as the subgroup variable increases, and a negative  $\beta$ -coefficient implies a decrease in uric acid. Residual I<sup>2</sup> reports inter-study heterogeneity not explained by the subgroup and was estimated using the Cochrane Q statistic.

\* N=4 trials missing data for baseline CRP

\*\*N=2 trials missing data for age in addition CRP trials

**Supplemental Figure S54 (part 1 of 3): Subgroup analyses for the effect of SSB on CRP (mg/L) in substitution trials**

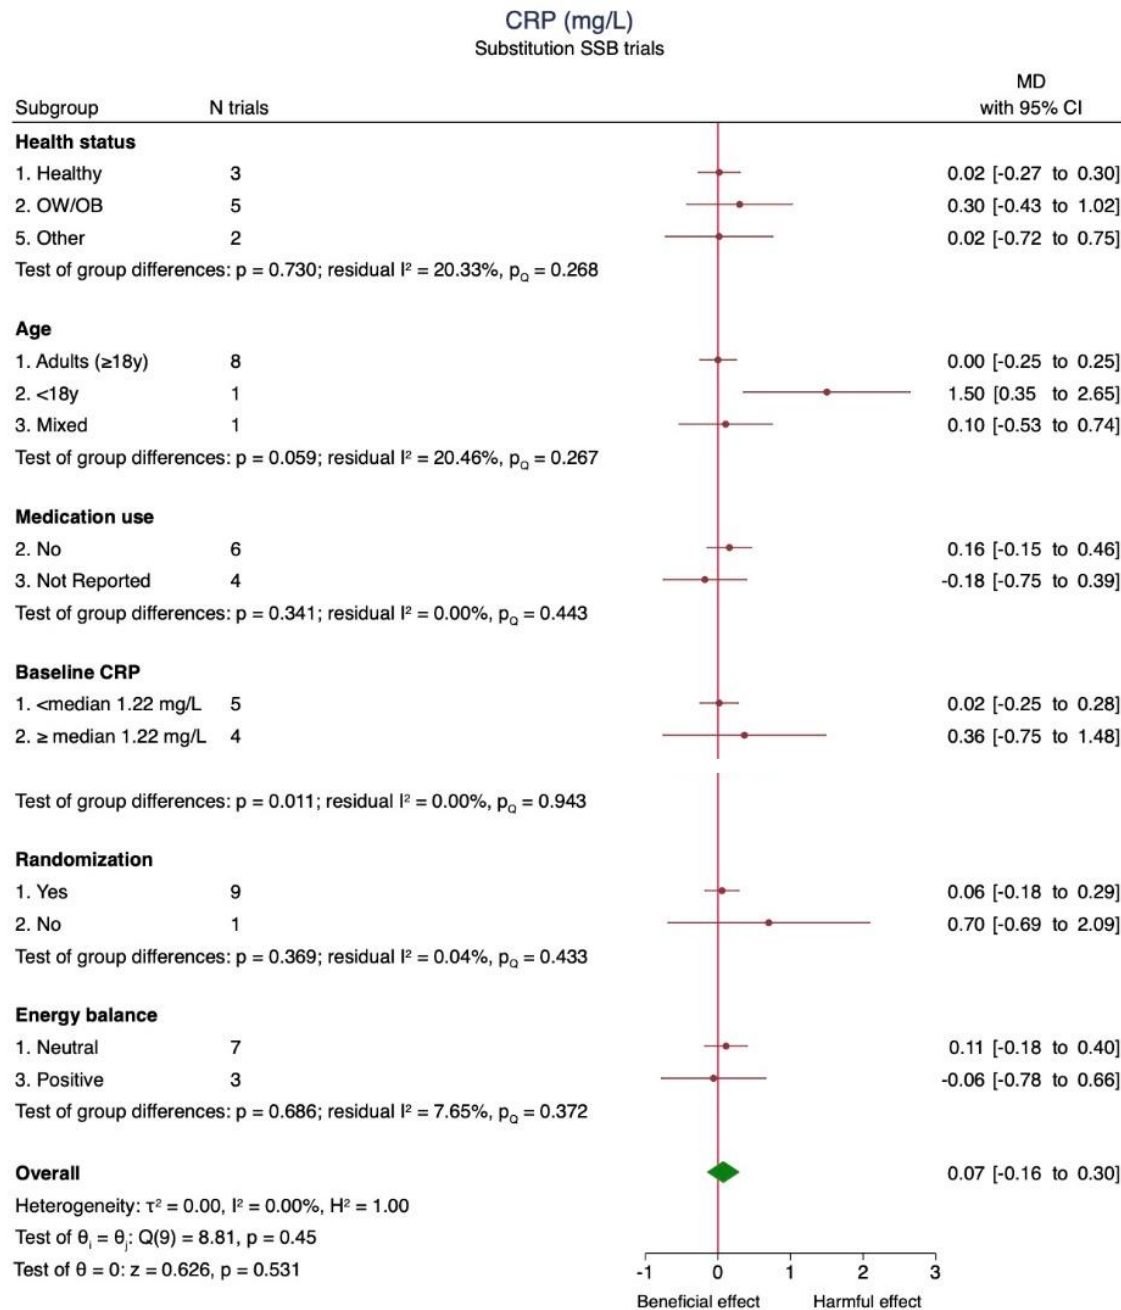

CI=confidence interval; CRP = C reactive protein; OW/OB=overweight or obese; MD= mean difference; y=years

\*N=1 trials missing data for baseline CRP

The green diamond represents the pooled estimate for the overall primary analysis of food sources of fructose-containing sugars and CRP. Within subgroup mean differences are the pooled effect estimates represented by a red circle. 95% confidence intervals are represented by the line through the circle. Data are expressed as mean differences with 95% confidence intervals using the generic inverse-variance method and random effects DerSimonian-Laird model. Inter-study heterogeneity was assessed using the Cochrane Q statistic and quantified using the  $I^2$  statistic, with significance set at  $P_Q < 0.100$  and  $I^2 \geq 50\%$  considered to be evidence of substantial heterogeneity.  $P < 0.050$  indicates that the effect size differed between levels of the subgroup.



**Supplemental Figure S54 (part 2 of 3): Subgroup analyses for the effect of SSB on CRP (mg/L) in substitution trials**

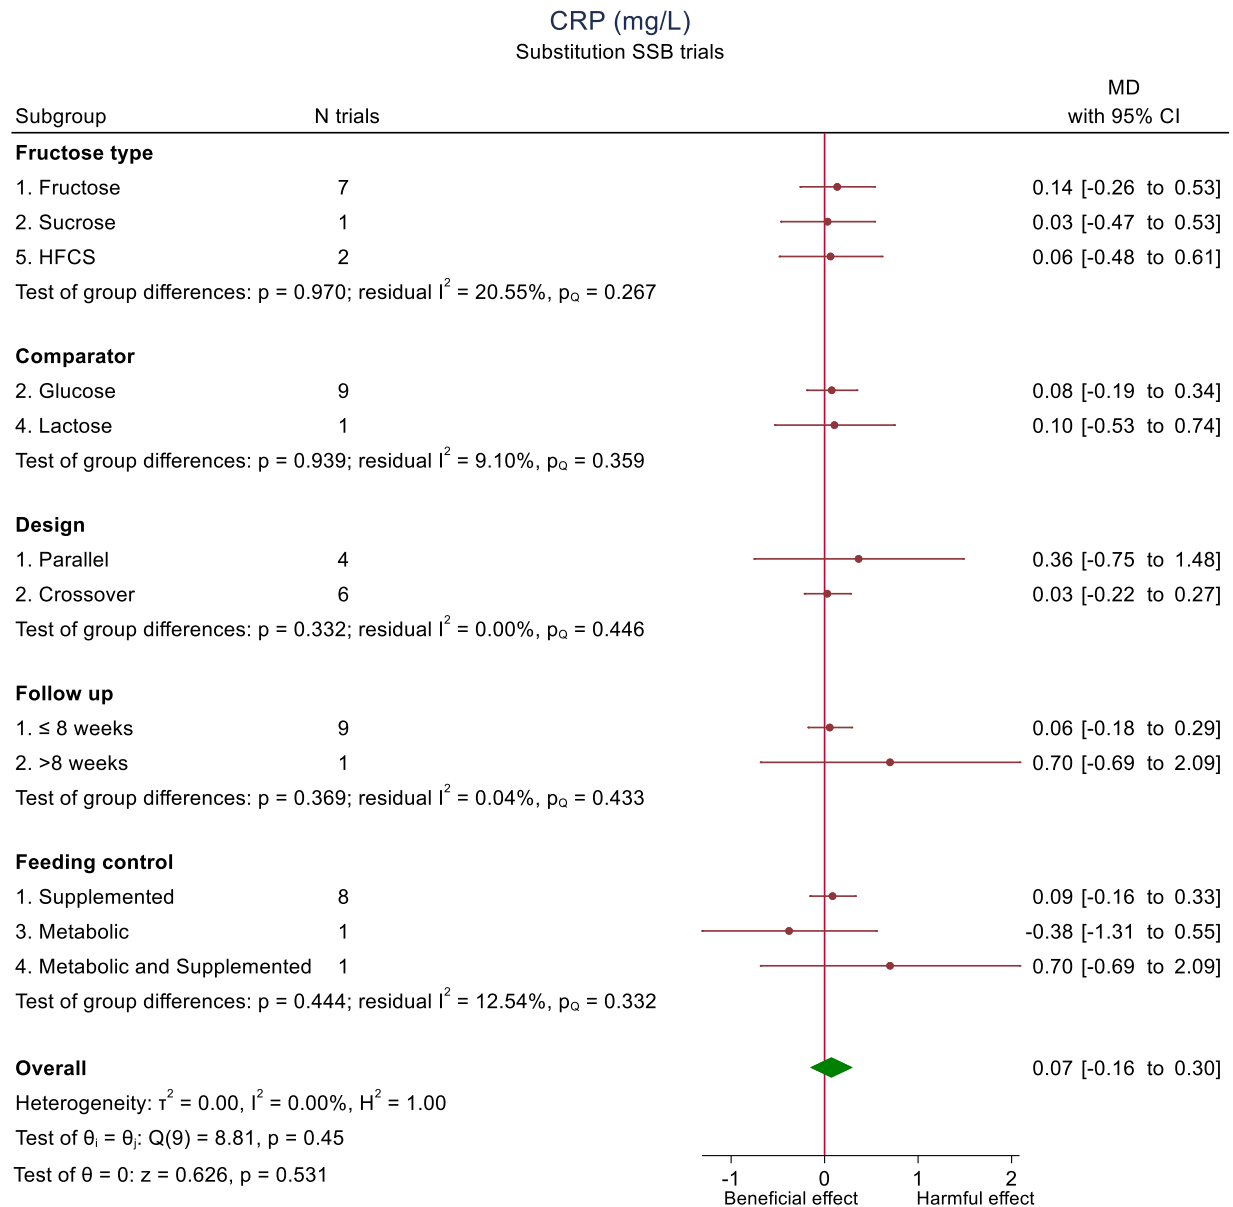

CI=confidence interval; CRP = C reactive protein ; HFCS = High fructose corn syrup; MD= mean difference  
The green diamond represents the pooled estimate for the overall primary analysis of food sources of fructose-containing sugars and CRP. Within subgroup mean differences are the pooled effect estimates represented by a red circle. 95% confidence intervals are represented by the line through the circle. Data are expressed as mean differences with 95% confidence intervals using the generic inverse-variance method and random effects DerSimonian-Laird model. Inter-study heterogeneity was assessed using the Cochrane Q statistic and quantified using the  $I^2$  statistic, with significance set at  $P_Q < 0.100$  and  $I^2 \geq 50\%$  considered to be evidence of substantial heterogeneity.  $P < 0.050$  indicates that the effect size differed between levels of the subgroup.

**Supplemental Figure S54 (part 3 of 3): Subgroup analyses for the effect of SSB on CRP (mg/L) in substitution trials**

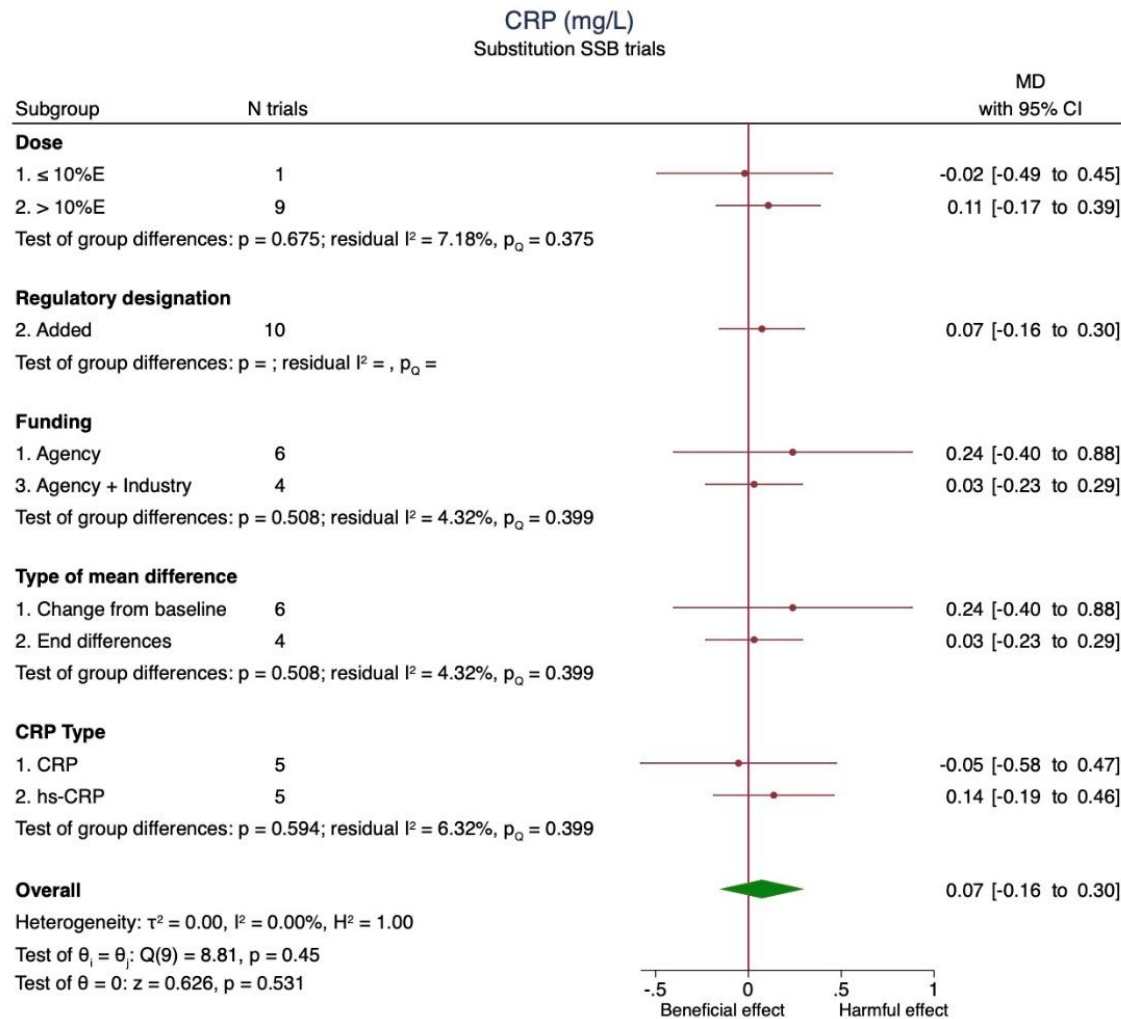

CI=confidence interval; CRP = C reactive protein ; E= energy; MD= mean difference

The green diamond represents the pooled estimate for the overall primary analysis of food sources of fructose-containing sugars and CRP. Within subgroup mean differences are the pooled effect estimates represented by a red circle. 95% confidence intervals are represented by the line through the circle. Data are expressed as mean differences with 95% confidence intervals using the generic inverse-variance method and random effects DerSimonian-Laird model. Inter-study heterogeneity was assessed using the Cochrane Q statistic and quantified using the  $I^2$  statistic, with significance set at  $P_Q < 0.100$  and  $I^2 \geq 50\%$  considered to be evidence of substantial heterogeneity.  $P < 0.050$  indicates that the effect size differed between levels of the subgroup.

**Supplemental Figure S55: Risk of bias (using The Cochrane Collaboration Tool) subgroup analysis for the effect of SSB on CRP (mg/L) in substitution trials**

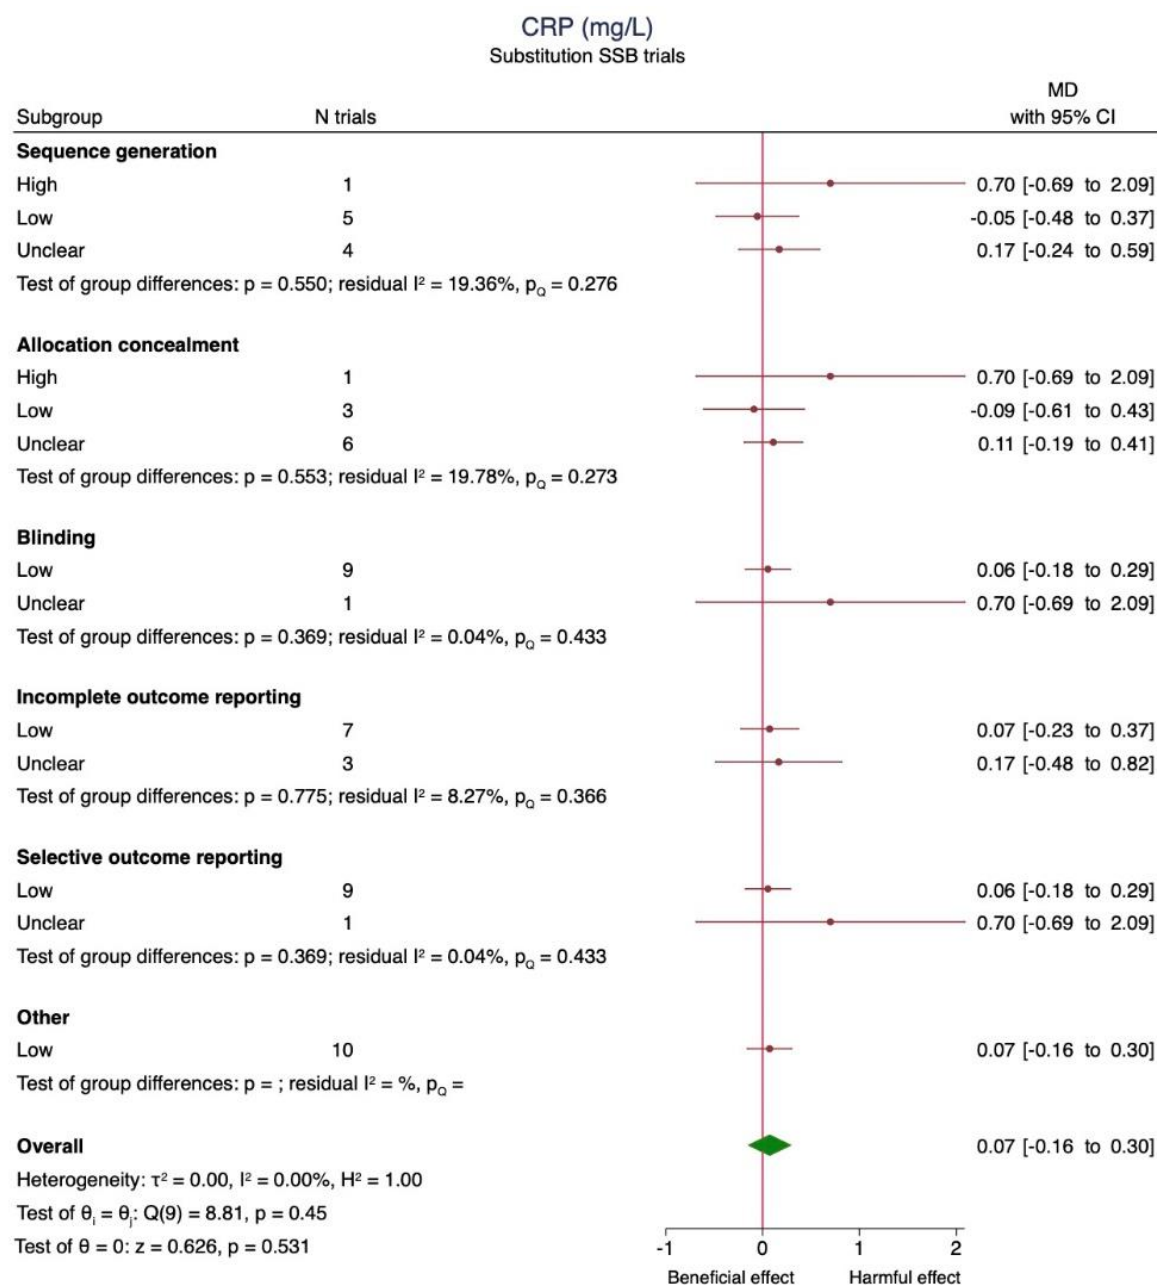

CI=confidence interval; CRP = C reactive protein ; MD= mean difference

The green diamond represents the pooled estimate for the overall primary analysis of food sources of fructose-containing sugars and CRP. Within subgroup mean differences are the pooled effect estimates represented by a red circle. 95% confidence intervals are represented by the line through the circle. Data are expressed as mean differences with 95% confidence intervals using the generic inverse-variance method and random effects DerSimonian-Laird model. Inter-study heterogeneity was assessed using the Cochrane Q statistic and quantified using the  $I^2$  statistic, with significance set at  $P_Q < 0.100$  and  $I^2 \geq 50\%$  considered to be evidence of substantial heterogeneity.  $P < 0.050$  indicates that the effect size differed between levels of the subgroup.

**Supplemental Figure S56 (part 1 of 3): Subgroup analyses for the effect of 100% fruit juice on CRP (mg/L) in addition trials**

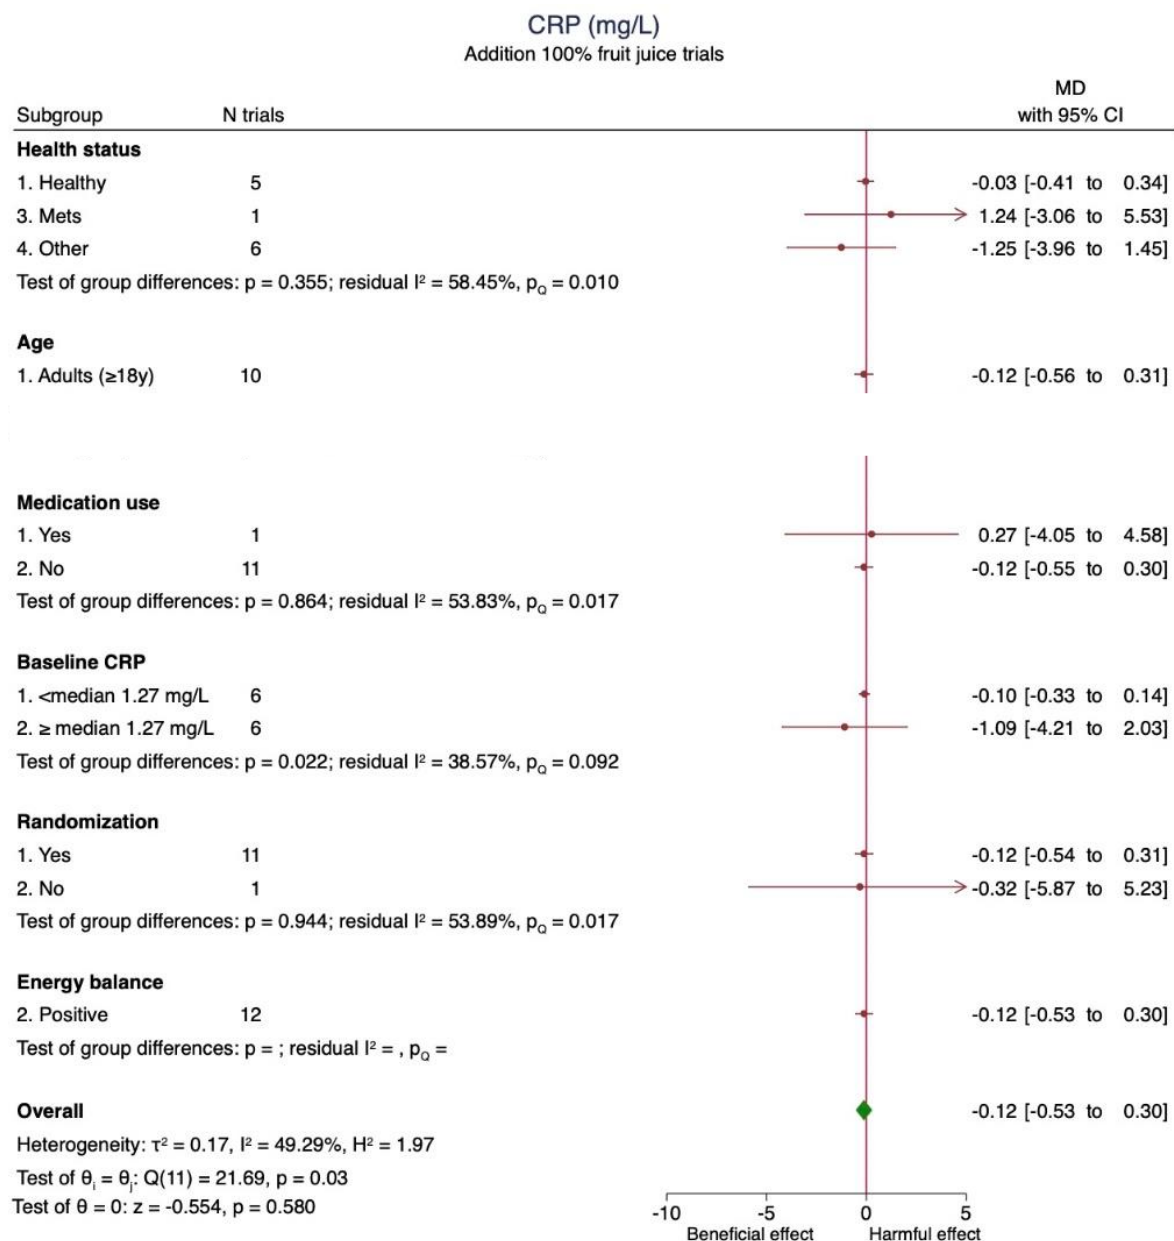

CI=confidence interval; CRP = C reactive protein; MD= mean difference; MetS= metabolic syndrome; y=years

\*N=2 trials missing data for age in addition 100% fruit juice trials

\*\*N=1 trial missing for baseline CRP

The green diamond represents the pooled estimate for the overall primary analysis of food sources of fructose-containing sugars and CRP. Within subgroup mean differences are the pooled effect estimates represented by a red circle. 95% confidence intervals are represented by the line through the circle. Data are expressed as mean differences with 95% confidence intervals using the generic inverse-variance method and random effects DerSimonian-Laird model. Inter-study heterogeneity was assessed using the Cochrane Q statistic and quantified using the  $I^2$  statistic, with significance set at  $P_Q < 0.100$  and  $I^2 \geq 50\%$  considered to be evidence of substantial heterogeneity.  $P < 0.050$  indicates that the effect size differed between levels of the subgroup.

**Supplemental Figure S56 (part 2 of 3): Subgroup analyses for the effect of 100% fruit juice on CRP (mg/L) in addition trials**

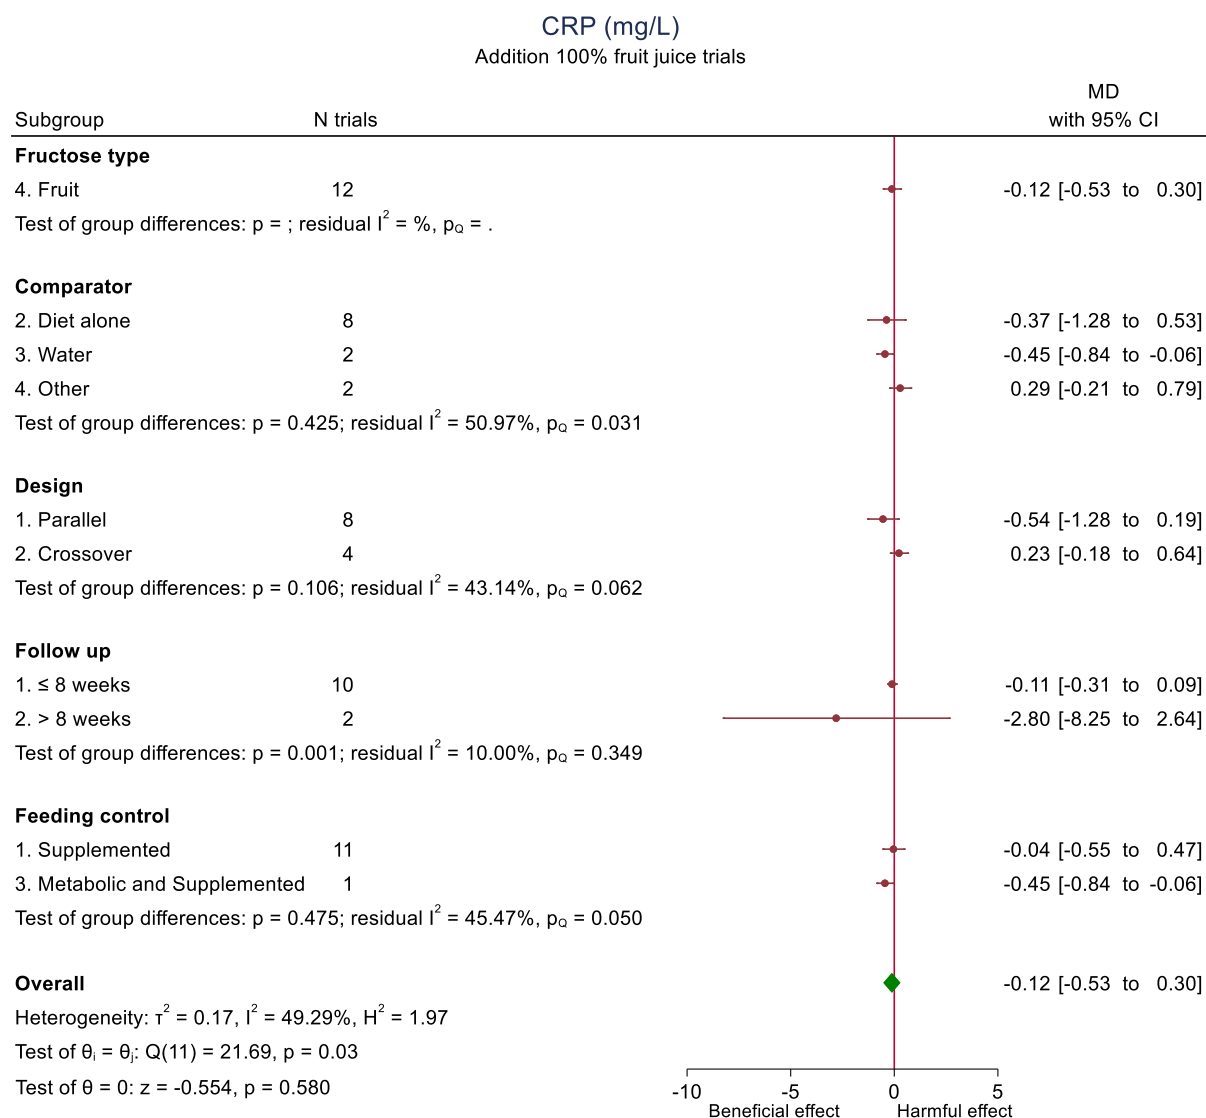

CI=confidence interval; CRP = C reactive protein; MD= mean difference;

The green diamond represents the pooled estimate for the overall primary analysis of food sources of fructose-containing sugars and CRP. Within subgroup mean differences are the pooled effect estimates represented by a red circle. 95% confidence intervals are represented by the line through the circle. Data are expressed as mean differences with 95% confidence intervals using the generic inverse-variance method and random effects DerSimonian-Laird model. Inter-study heterogeneity was assessed using the Cochrane Q statistic and quantified using the  $I^2$  statistic, with significance set at  $P_Q < 0.100$  and  $I^2 \geq 50\%$  considered to be evidence of substantial heterogeneity.  $P < 0.050$  indicates that the effect size differed between levels of the subgroup.

**Supplemental Figure S56 (part 3 of 3): Subgroup analyses for the effect of 100% fruit juice on CRP (mg/L) in addition trials**

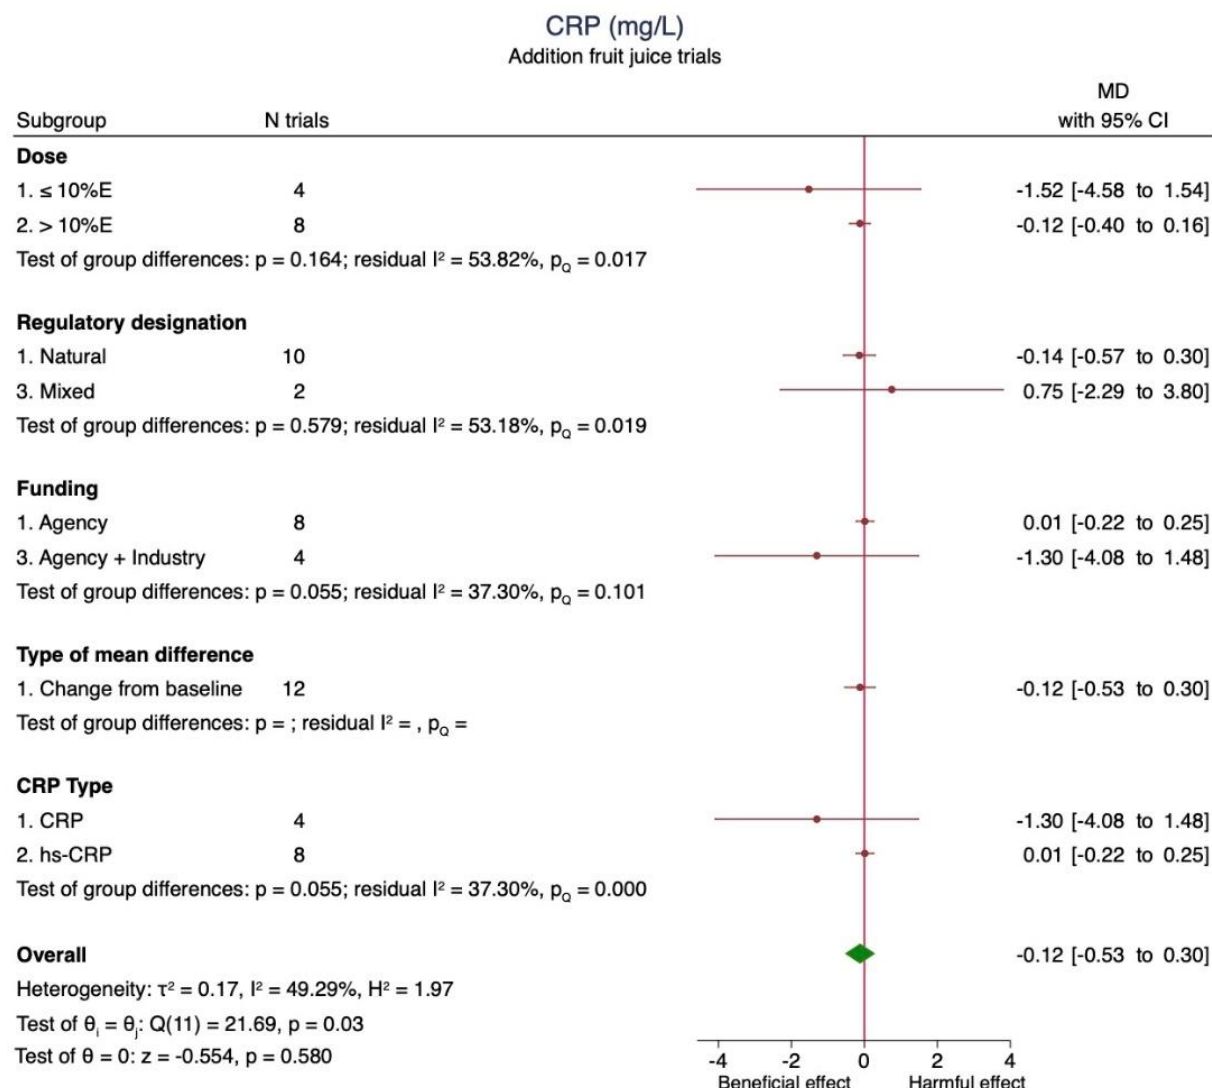

CI=confidence interval; CRP = C reactive protein; E= energy; MD= mean difference;

The green diamond represents the pooled estimate for the overall primary analysis of food sources of fructose-containing sugars and CRP. Within subgroup mean differences are the pooled effect estimates represented by a red circle. 95% confidence intervals are represented by the line through the circle. Data are expressed as mean differences with 95% confidence intervals using the generic inverse-variance method and random effects DerSimonian-Laird model. Inter-study heterogeneity was assessed using the Cochrane Q statistic and quantified using the  $I^2$  statistic, with significance set at  $P_Q < 0.100$  and  $I^2 \geq 50\%$  considered to be evidence of substantial heterogeneity.  $P < 0.050$  indicates that the effect size differed between levels of the subgroup.

**Supplemental Figure S57: Risk of bias (using The Cochrane Collaboration Tool) subgroup analysis for the effect of 100% fruit juice on CRP (mg/L) in addition trials**

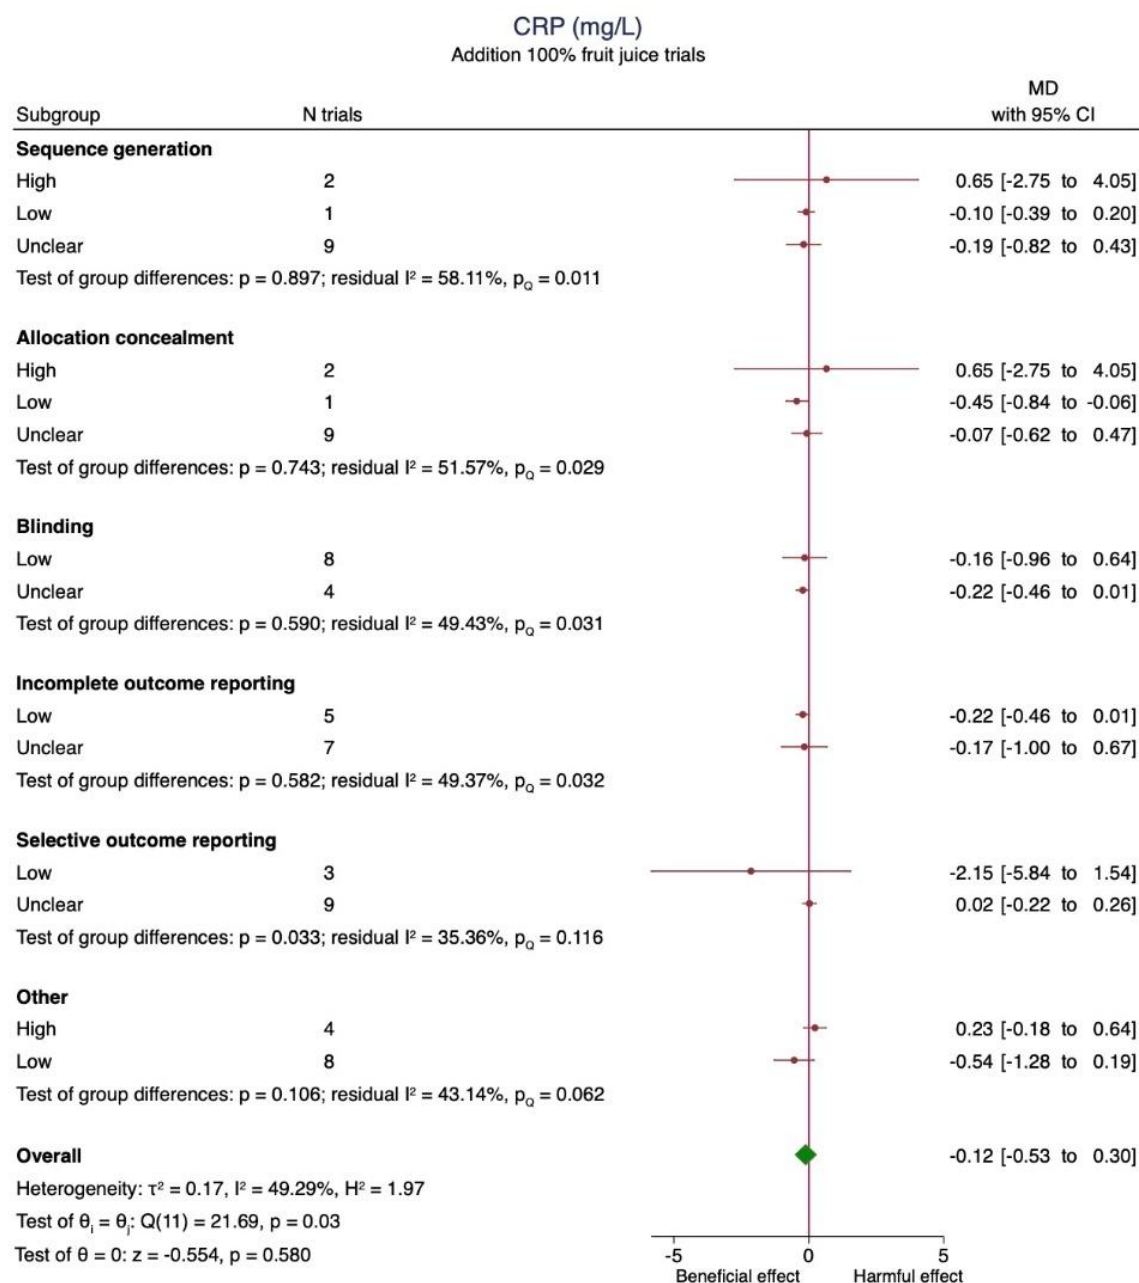

CI=confidence interval; CRP = C reactive protein; MD= mean difference;

The green diamond represents the pooled estimate for the overall primary analysis of food sources of fructose-containing sugars and CRP. Within subgroup mean differences are the pooled effect estimates represented by a red circle. 95% confidence intervals are represented by the line through the circle. Data are expressed as mean differences with 95% confidence intervals using the generic inverse-variance method and random effects DerSimonian-Laird model. Inter-study heterogeneity was assessed using the Cochrane Q statistic and quantified using the  $I^2$  statistic, with significance set at  $P_Q < 0.100$  and  $I^2 \geq 50\%$  considered to be evidence of substantial heterogeneity.  $P < 0.050$  indicates that the effect size differed between levels of the subgroup.



### Supplemental Figure S58: Continuous meta-regression analysis for the effect SSB on CRP (mg/L) in substitution comparisons

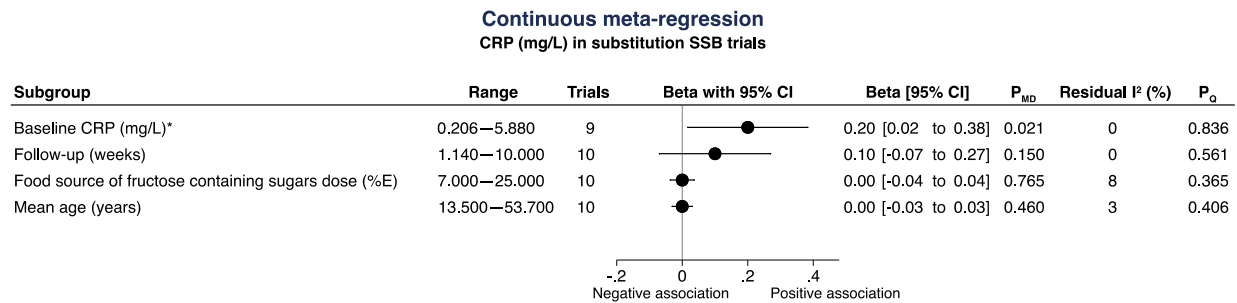

CI=confidence interval; CRP= C reactive protein; %E=percentage of total energy intake

Data is presented as between group mean difference (95% confidence intervals) for a 1-unit change in the predictor variable.  $\beta$ -coefficients were estimated using continuous meta-regression analysis. A positive  $\beta$ -coefficient implies an increase in CRP with the food source of fructose-containing sugars intervention as the subgroup variable increases, and a negative  $\beta$ -coefficient implies a decrease in uric acid. Residual  $I^2$  reports inter-study heterogeneity not explained by the subgroup and was estimated using the Cochrane Q statistic.

\* N=1 trials missing data for baseline CRP

### Supplemental Figure S59: Continuous meta-regression analysis for the effect of 100% fruit juice on CRP (mg/L) in addition comparisons

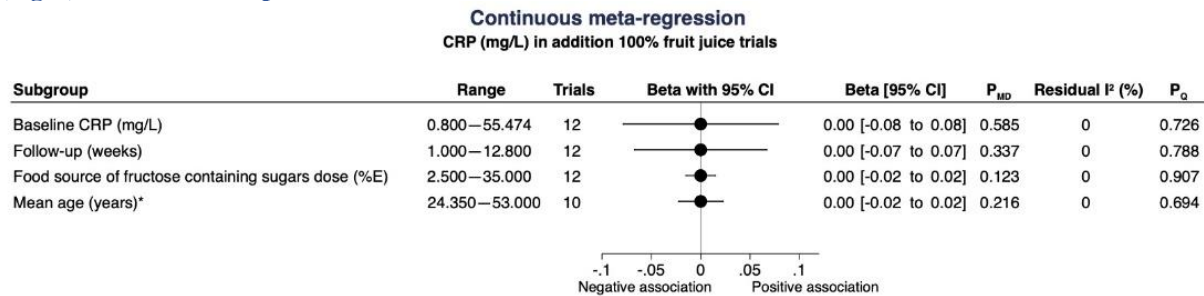

CI=confidence interval; CRP= C reactive protein; %E=percentage of total energy intake

Data is presented as between group mean difference (95% confidence intervals) for a 1-unit change in the predictor variable.  $\beta$ -coefficients were estimated using continuous meta-regression analysis. A positive  $\beta$ -coefficient implies an increase in CRP with the food source of fructose-containing sugars intervention as the subgroup variable increases, and a negative  $\beta$ -coefficient implies a decrease in uric acid. Residual  $I^2$  reports inter-study heterogeneity not explained by the subgroup and was estimated using the Cochrane Q statistic.

\*N=2 trials missing data for age in addition 100% fruit juice trials



**Supplemental Figure S60 (part 1 of 3): Subgroup analyses for the effect of important food sources of fructose-containing sugars on TNF- $\alpha$  (pg/mL) in substitution trials**

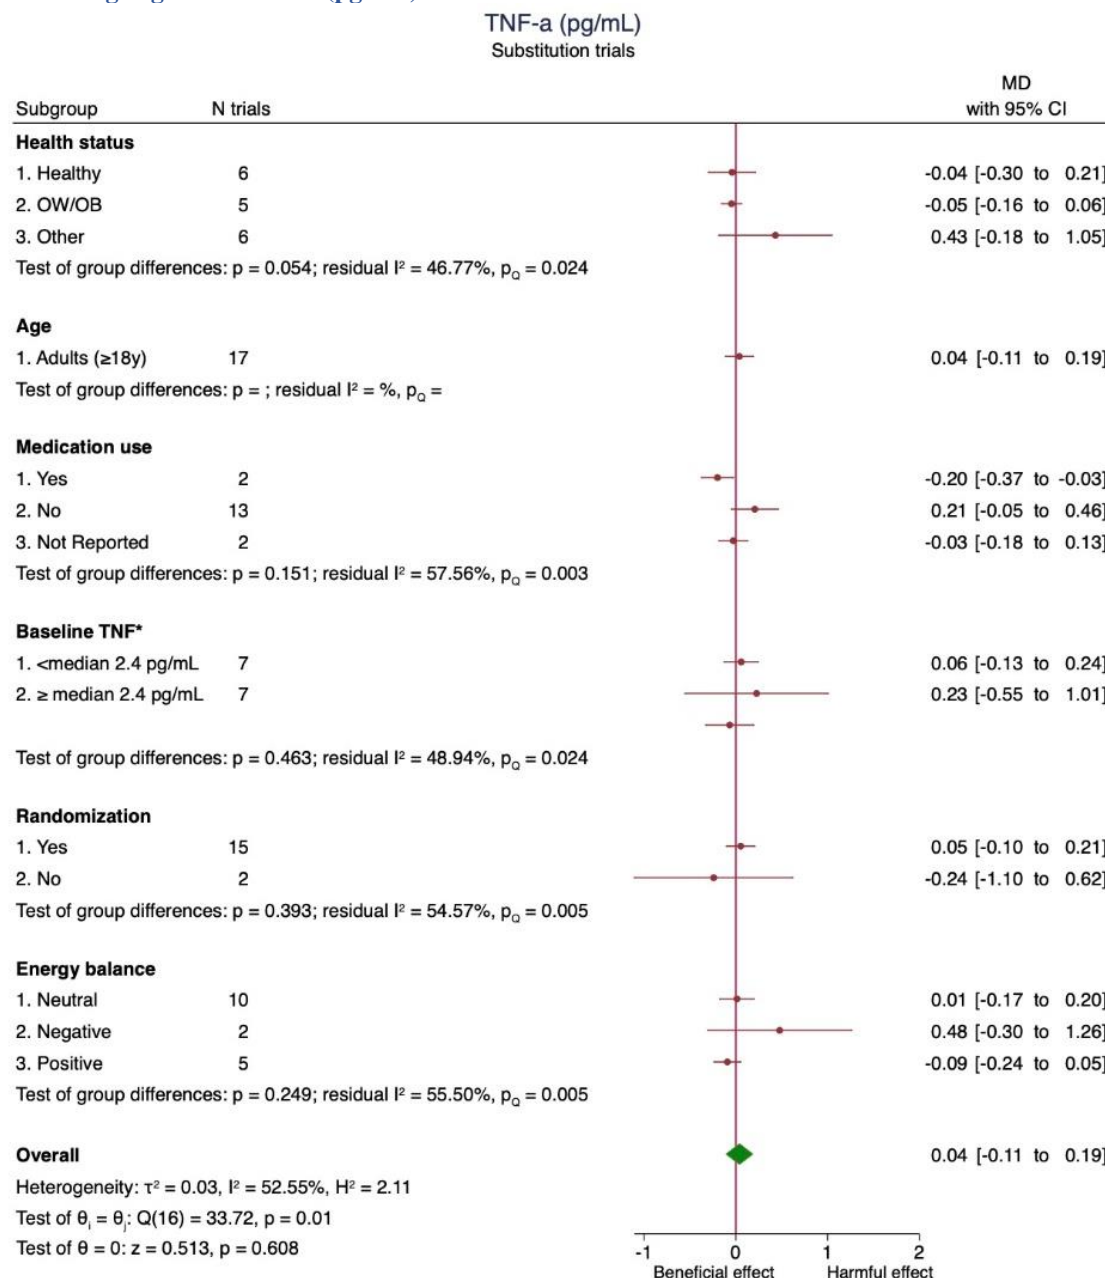

CI=confidence interval; MD= mean difference; OW/OB=overweight or obese; TNF- $\alpha$  = tumour necrosis factor alpha; y=years

\*N=3 trials missing for baseline TNF

The green diamond represents the pooled estimate for the overall primary analysis of food sources of fructose-containing sugars and CRP. Within subgroup mean differences are the pooled effect estimates represented by a red circle. 95% confidence intervals are represented by the line through the circle. Data are expressed as mean differences with 95% confidence intervals using the generic inverse-variance method and random effects DerSimonian-Laird model. Inter-study heterogeneity was assessed using the Cochrane Q statistic and quantified using the  $I^2$  statistic, with significance set at  $P_Q < 0.100$  and  $I^2 \geq 50\%$  considered to be evidence of substantial heterogeneity.  $P < 0.050$  indicates that the effect size differed between levels of the subgroup.

**Supplemental Figure S60 (part 2 of 3): Subgroup analyses for the effect of important food sources of fructose-containing sugars on TNF- $\alpha$  (pg/mL) in substitution trials**

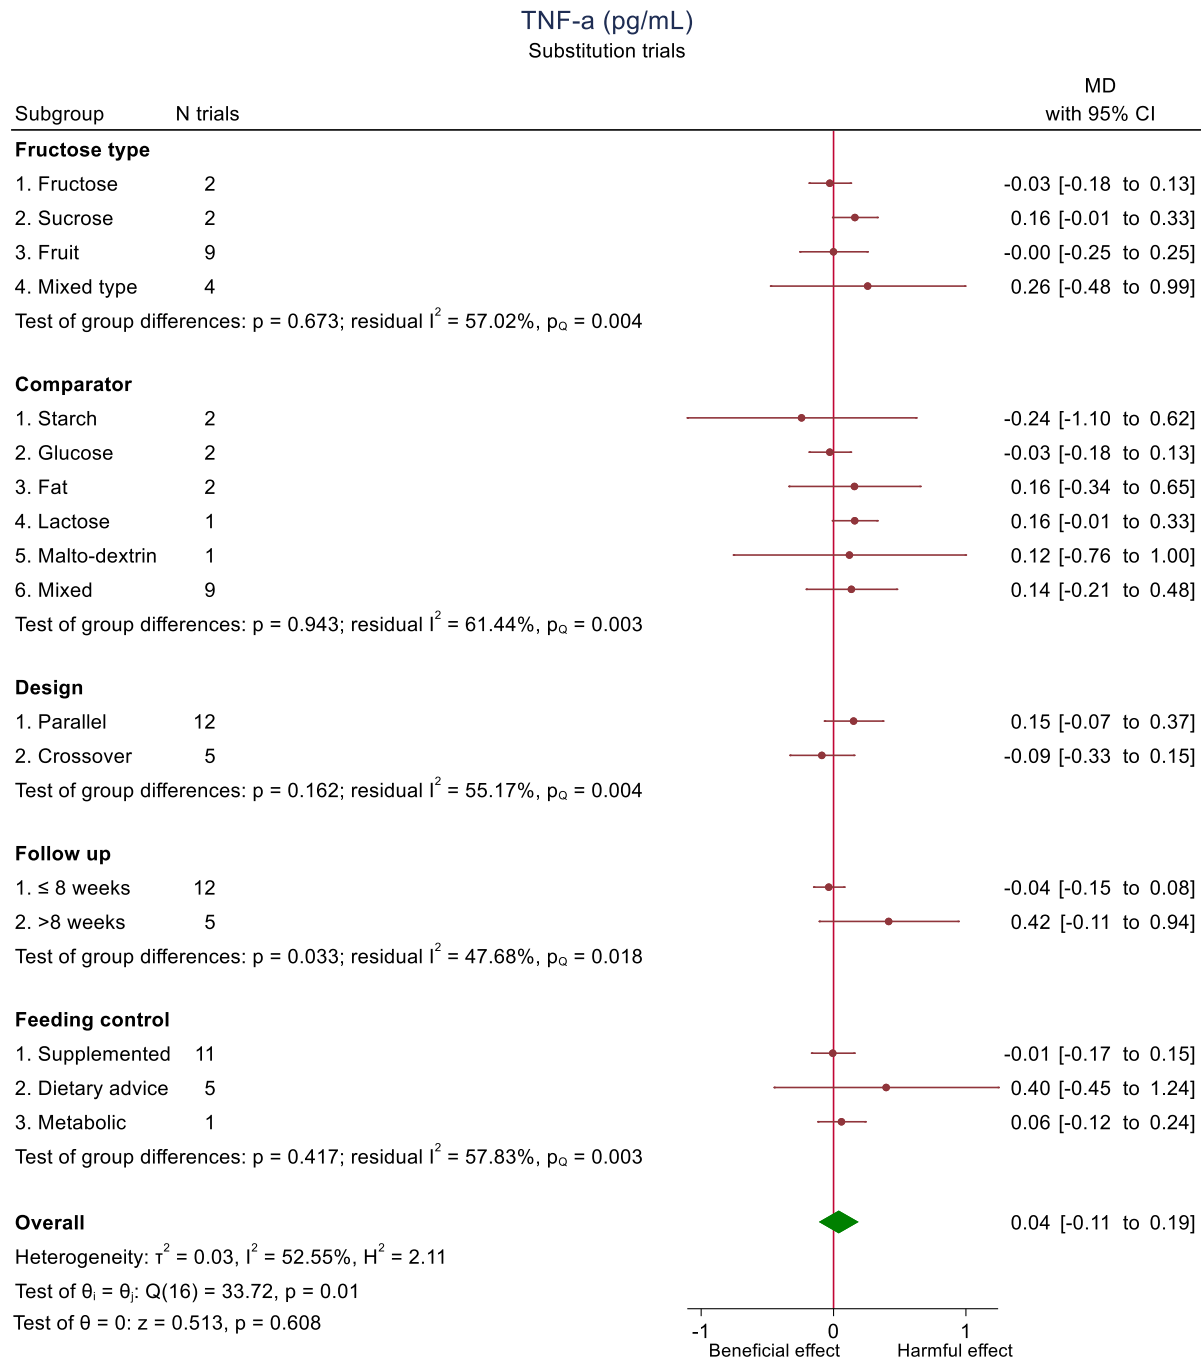

CI=confidence interval; MD= mean difference; TNF- $\alpha$  = tumour necrosis factor-alpha

The green diamond represents the pooled estimate for the overall primary analysis of food sources of fructose-containing sugars and CRP. Within subgroup mean differences are the pooled effect estimates represented by a red circle. 95% confidence intervals are represented by the line through the circle. Data are expressed as mean differences with 95% confidence intervals using the generic inverse-variance method and random effects DerSimonian-Laird model. Inter-study heterogeneity was assessed using the Cochrane Q statistic and quantified using the  $I^2$  statistic, with significance set at  $P_Q < 0.100$  and  $I^2 \geq 50\%$  considered to be evidence of substantial heterogeneity.  $P < 0.050$  indicates that the effect size differed between levels of the subgroup.

**Supplemental Figure S60 (part 3 of 3): Subgroup analyses for the effect of important food sources of fructose-containing sugars on TNF- $\alpha$  (pg/mL) in substitution trials**

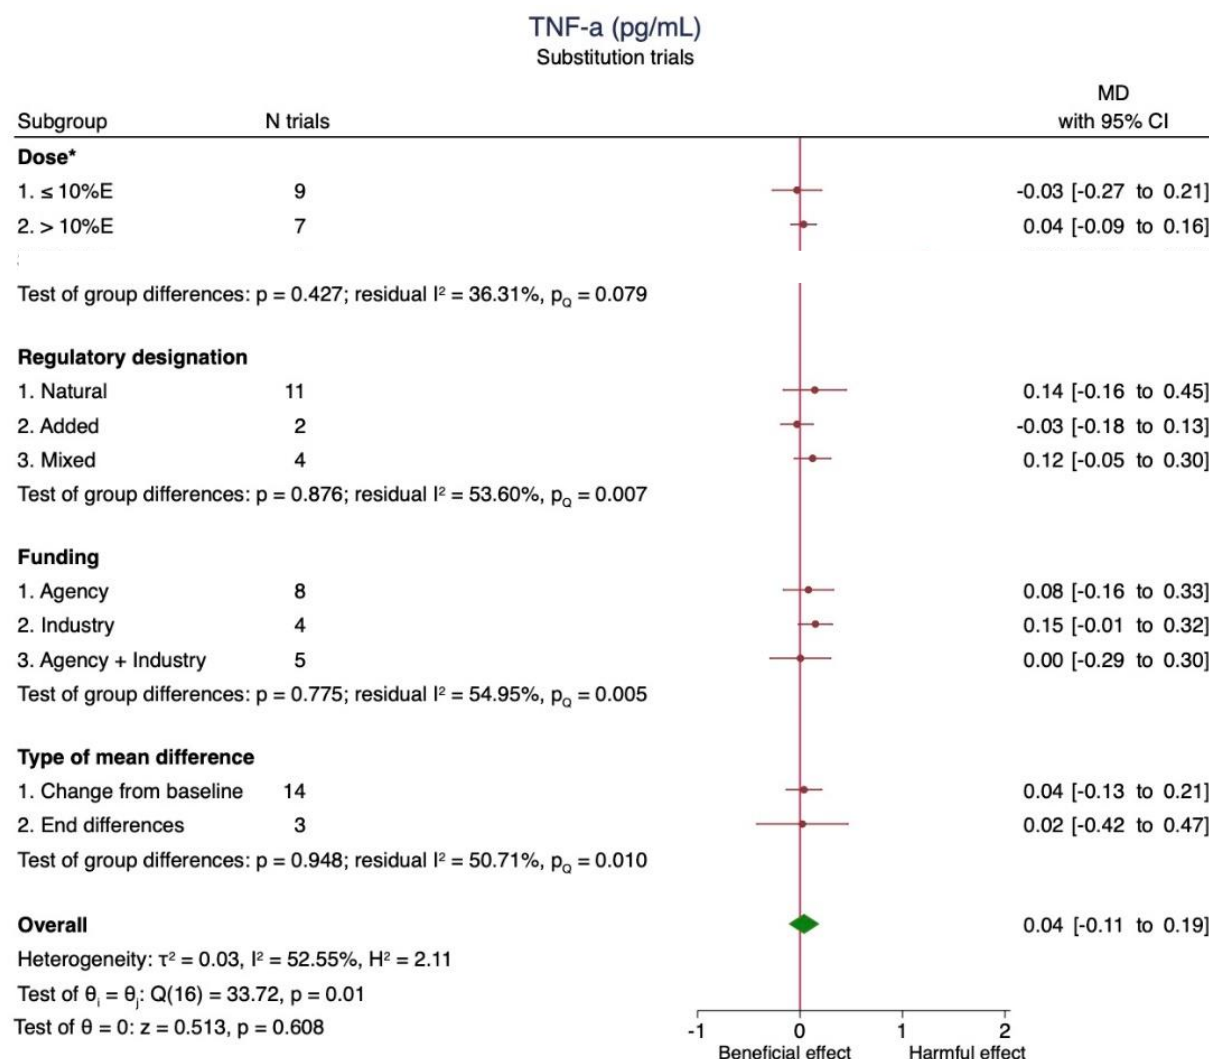

CI=confidence interval; E= Energy; MD= mean difference; TNF- $\alpha$  = tumour necrosis factor alpha;  
The green diamond represents the pooled estimate for the overall primary analysis of food sources of fructose-containing sugars and CRP. Within subgroup mean differences are the pooled effect estimates represented by a red circle. 95% confidence intervals are represented by the line through the circle. Data are expressed as mean differences with 95% confidence intervals using the generic inverse-variance method and random effects DerSimonian-Laird model. Inter-study heterogeneity was assessed using the Cochrane Q statistic and quantified using the  $I^2$  statistic, with significance set at  $P_Q < 0.100$  and  $I^2 \geq 50\%$  considered to be evidence of substantial heterogeneity.  $P < 0.050$  indicates that the effect size differed between levels of the subgroup.

**Supplemental Figure S61: Risk of bias (using The Cochrane Collaboration Tool) subgroup analysis for the effect of important food sources of fructose-containing sugars on TNF-α (pg/mL) in substitution trials**

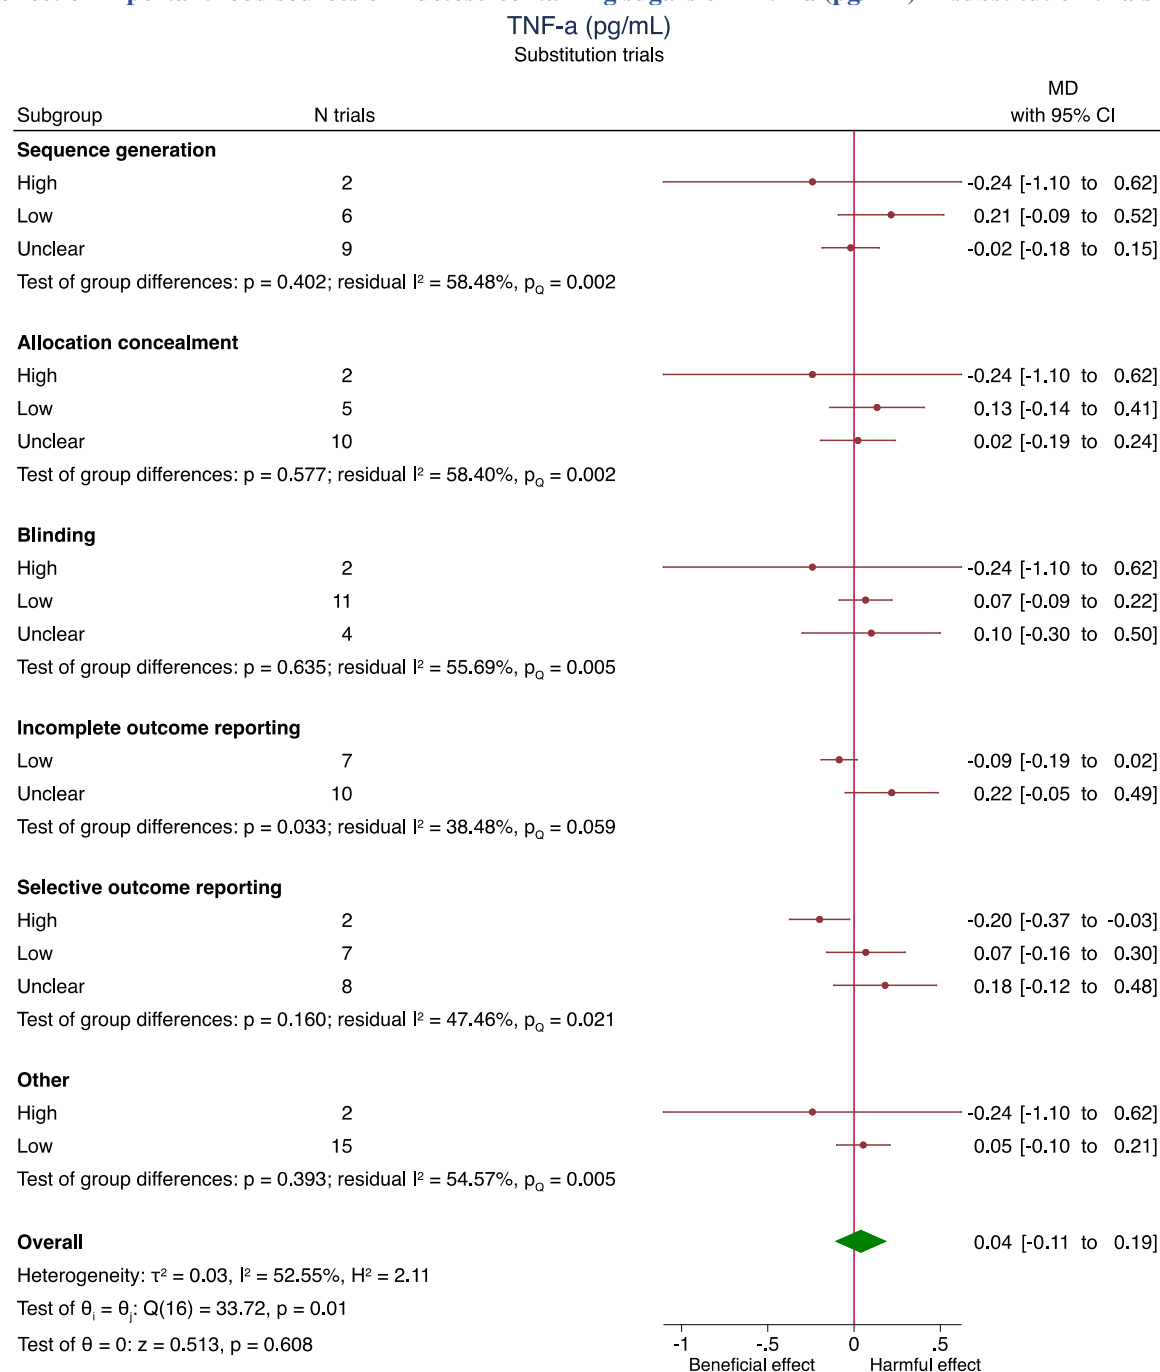

CI=confidence interval; MD= mean difference; TNF-α = tumour necrosis factor-alpha

The green diamond represents the pooled estimate for the overall primary analysis of food sources of fructose-containing sugars and CRP. Within subgroup mean differences are the pooled effect estimates represented by a red circle. 95% confidence intervals are represented by the line through the circle. Data are expressed as mean differences with 95% confidence intervals using the generic inverse-variance method and random effects DerSimonian-Laird model. Inter-study heterogeneity was assessed using the Cochrane Q statistic and quantified using the  $I^2$  statistic, with significance set at  $P_Q < 0.100$  and  $I^2 \geq 50\%$  considered to be evidence of substantial heterogeneity.  $P < 0.050$  indicates that the effect size differed between levels of the subgroup.

**Supplemental Figure S62 (part 1 of 3): Subgroup analyses for the effect of important food sources of fructose-containing sugars on TNF- $\alpha$  (pg/mL) in addition trials**

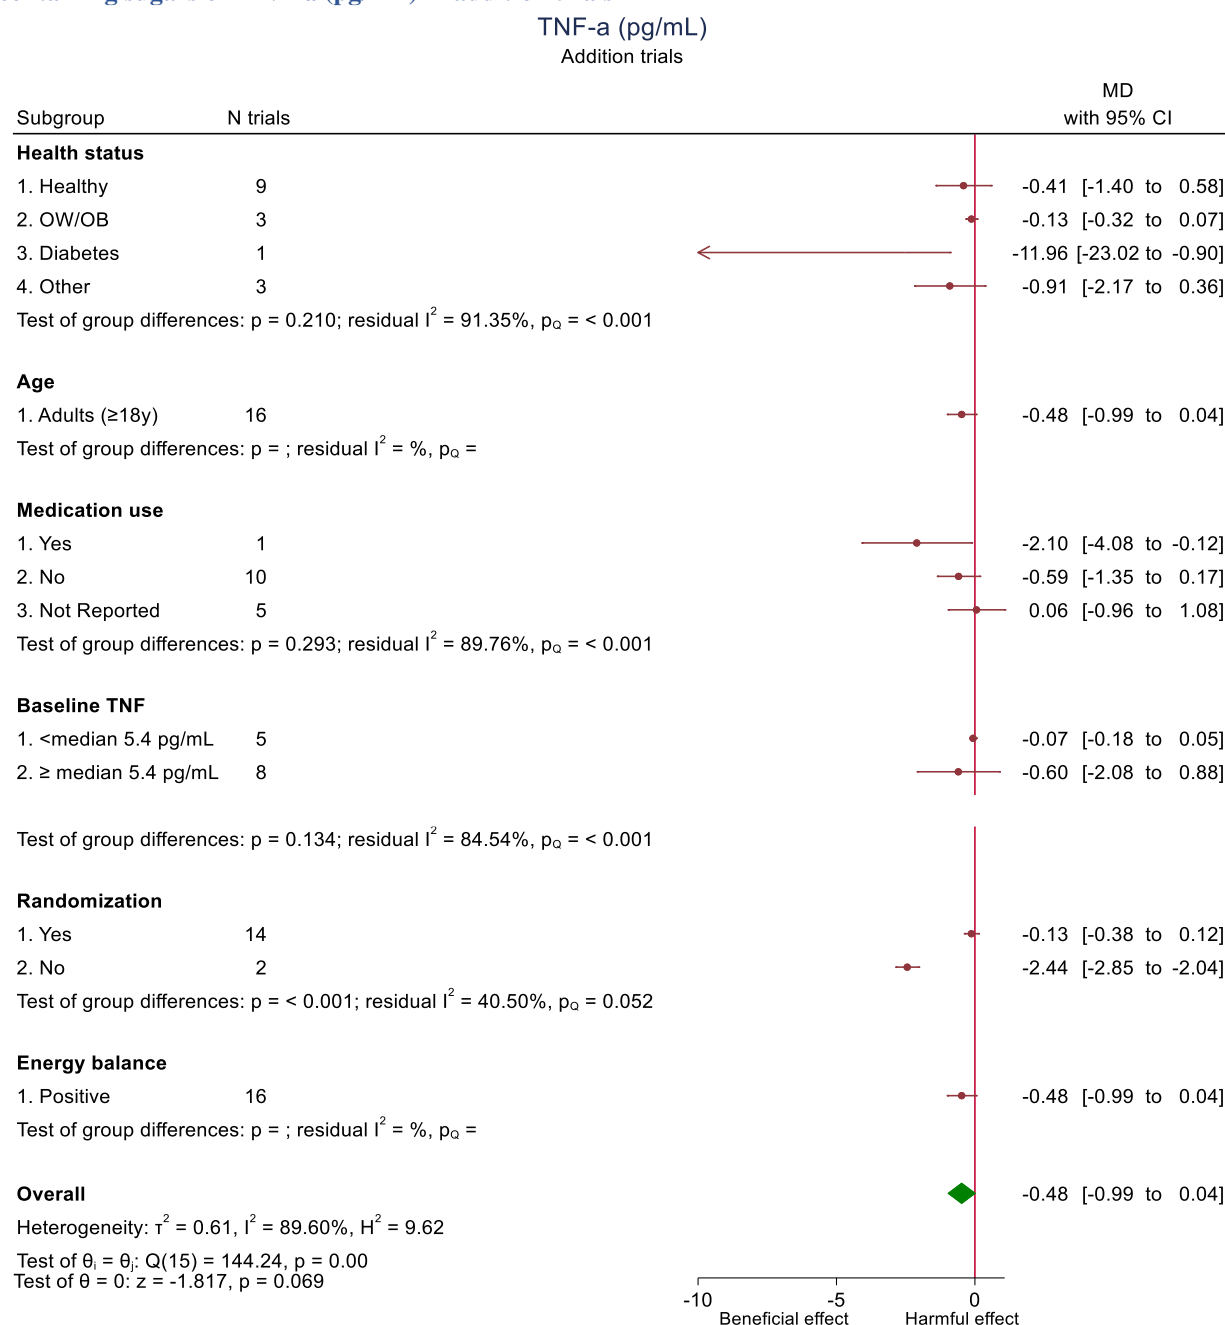

CI=confidence interval; MD=mean difference; OW/OB=overweight or obese; TNF- $\alpha$  = tumour necrosis factor- $\alpha$   
\*N=4 trials missing in baseline TNF- $\alpha$

The green diamond represents the pooled estimate for the overall primary analysis of food sources of fructose-containing sugars and CRP. Within subgroup mean differences are the pooled effect estimates represented by a red circle. 95% confidence intervals are represented by the line through the circle. Data are expressed as mean differences with 95% confidence intervals using the generic inverse-variance method and random effects DerSimonian-Laird model. Inter-study heterogeneity was assessed using the Cochrane Q statistic and quantified using the  $I^2$  statistic, with significance set at  $P_Q < 0.100$  and  $I^2 \geq 50\%$  considered to be evidence of substantial heterogeneity.  $P < 0.050$  indicates that the effect size differed between levels of the subgroup.

**Supplemental Figure S62 (part 2 of 3): Subgroup analyses for the effect of important food sources of fructose-containing sugars on TNF- $\alpha$  (pg/mL) in addition trials**

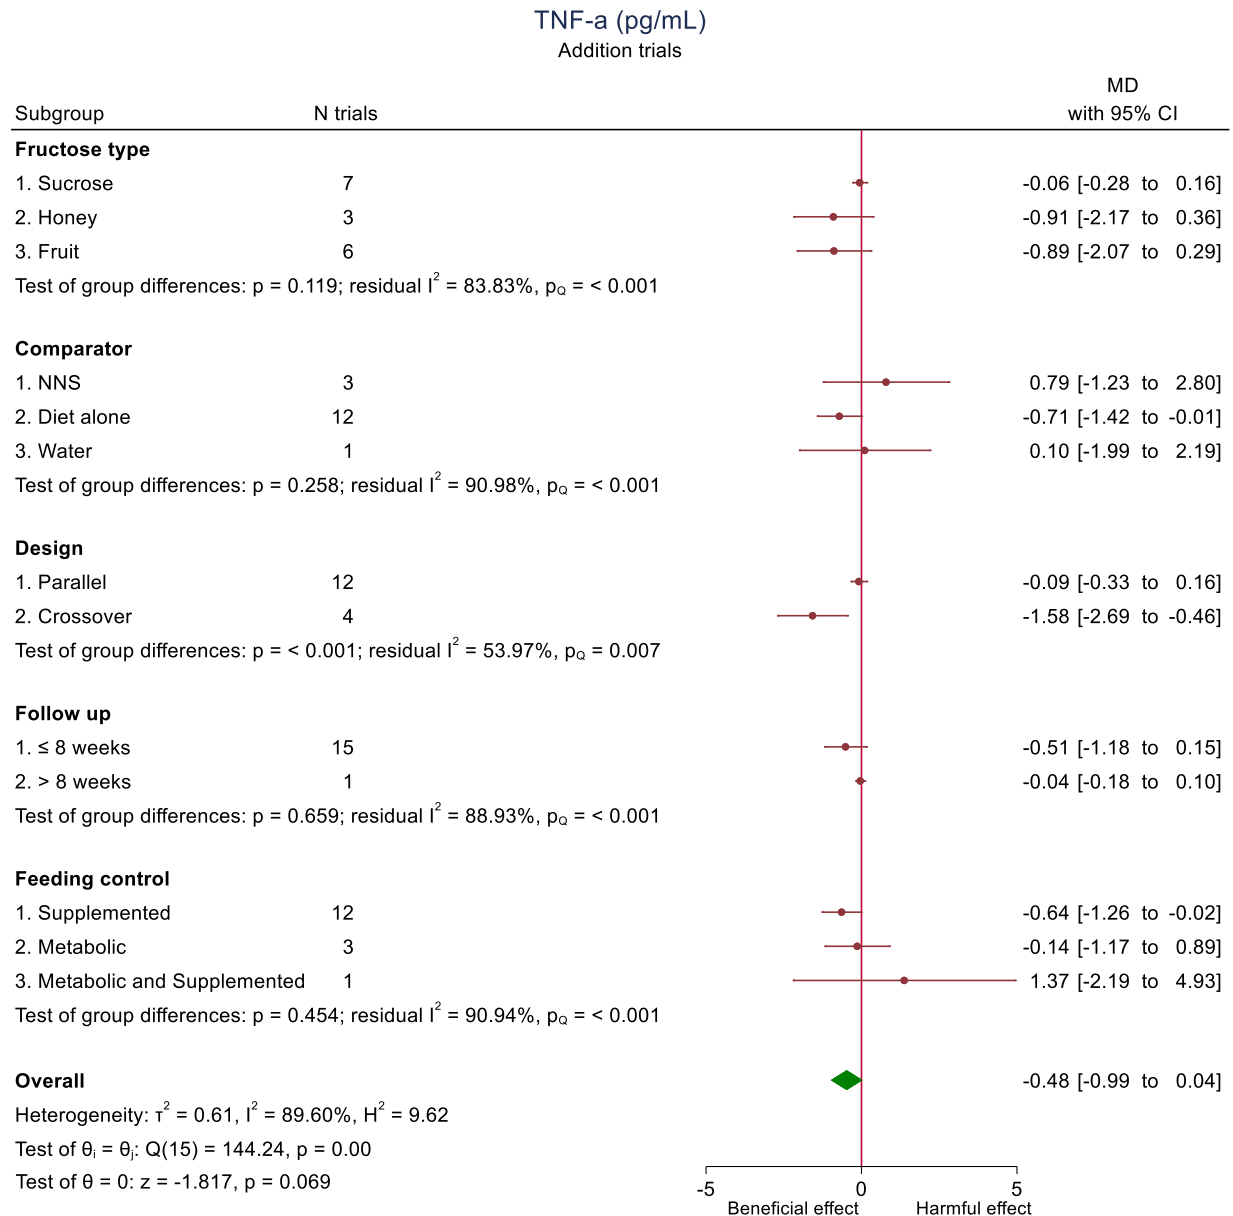

CI=confidence interval; HFCS= high fructose corn syrup; MD= mean difference; NNS= non-nutritive sweetener; TNF- $\alpha$  = tumour necrosis factor- $\alpha$

The green diamond represents the pooled estimate for the overall primary analysis of food sources of fructose-containing sugars and CRP. Within subgroup mean differences are the pooled effect estimates represented by a red circle. 95% confidence intervals are represented by the line through the circle. Data are expressed as mean differences with 95% confidence intervals using the generic inverse-variance method and random effects DerSimonian-Laird model. Inter-study heterogeneity was assessed using the Cochrane Q statistic and quantified using the  $I^2$  statistic, with significance set at  $P_Q < 0.100$  and  $I^2 \geq 50\%$  considered to be evidence of substantial heterogeneity.  $P < 0.050$  indicates that the effect size differed between levels of the subgroup.

**Supplemental Figure S62 (part 3 of 3): Subgroup analyses for the effect of important food sources of fructose-containing sugars on TNF- $\alpha$  (pg/mL) in addition trials**

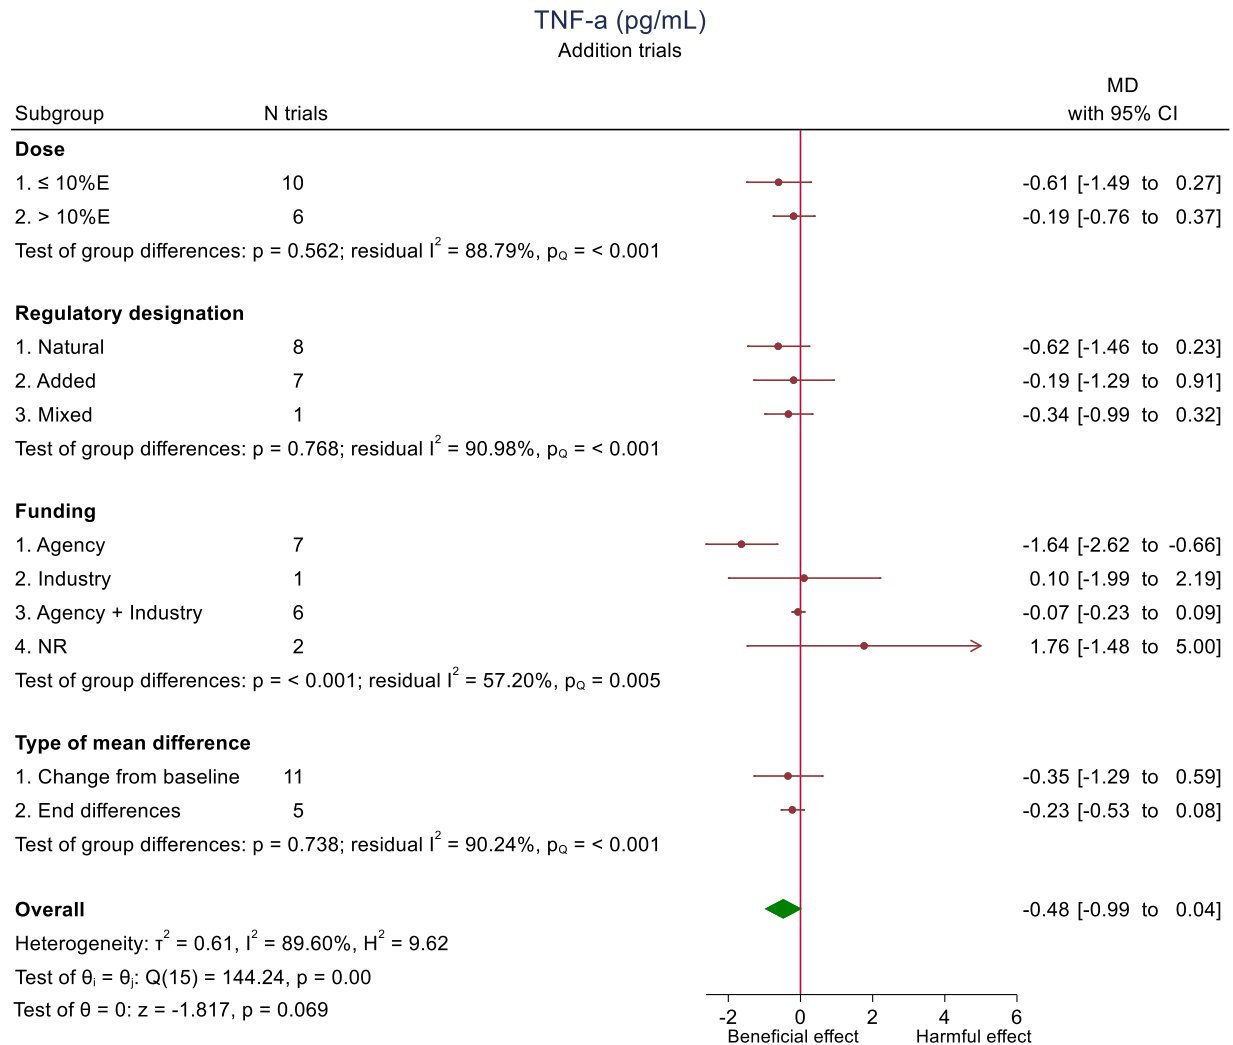

CI=confidence interval; E=energy; MD= mean difference; NR= not reported; TNF- $\alpha$  = tumour necrosis factor alpha; The green diamond represents the pooled estimate for the overall primary analysis of food sources of fructose-containing sugars and CRP. Within subgroup mean differences are the pooled effect estimates represented by a red circle. 95% confidence intervals are represented by the line through the circle. Data are expressed as mean differences with 95% confidence intervals using the generic inverse-variance method and random effects DerSimonian-Laird model. Inter-study heterogeneity was assessed using the Cochrane Q statistic and quantified using the  $I^2$  statistic, with significance set at  $P_Q < 0.100$  and  $I^2 \geq 50\%$  considered to be evidence of substantial heterogeneity.  $P < 0.050$  indicates that the effect size differed between levels of the subgroup.

**Supplemental Figure S63: Risk of bias (using The Cochrane Collaboration Tool) subgroup analysis for the effect of important food sources of fructose-containing sugars on TNF- $\alpha$  (pg/mL) in addition trials**

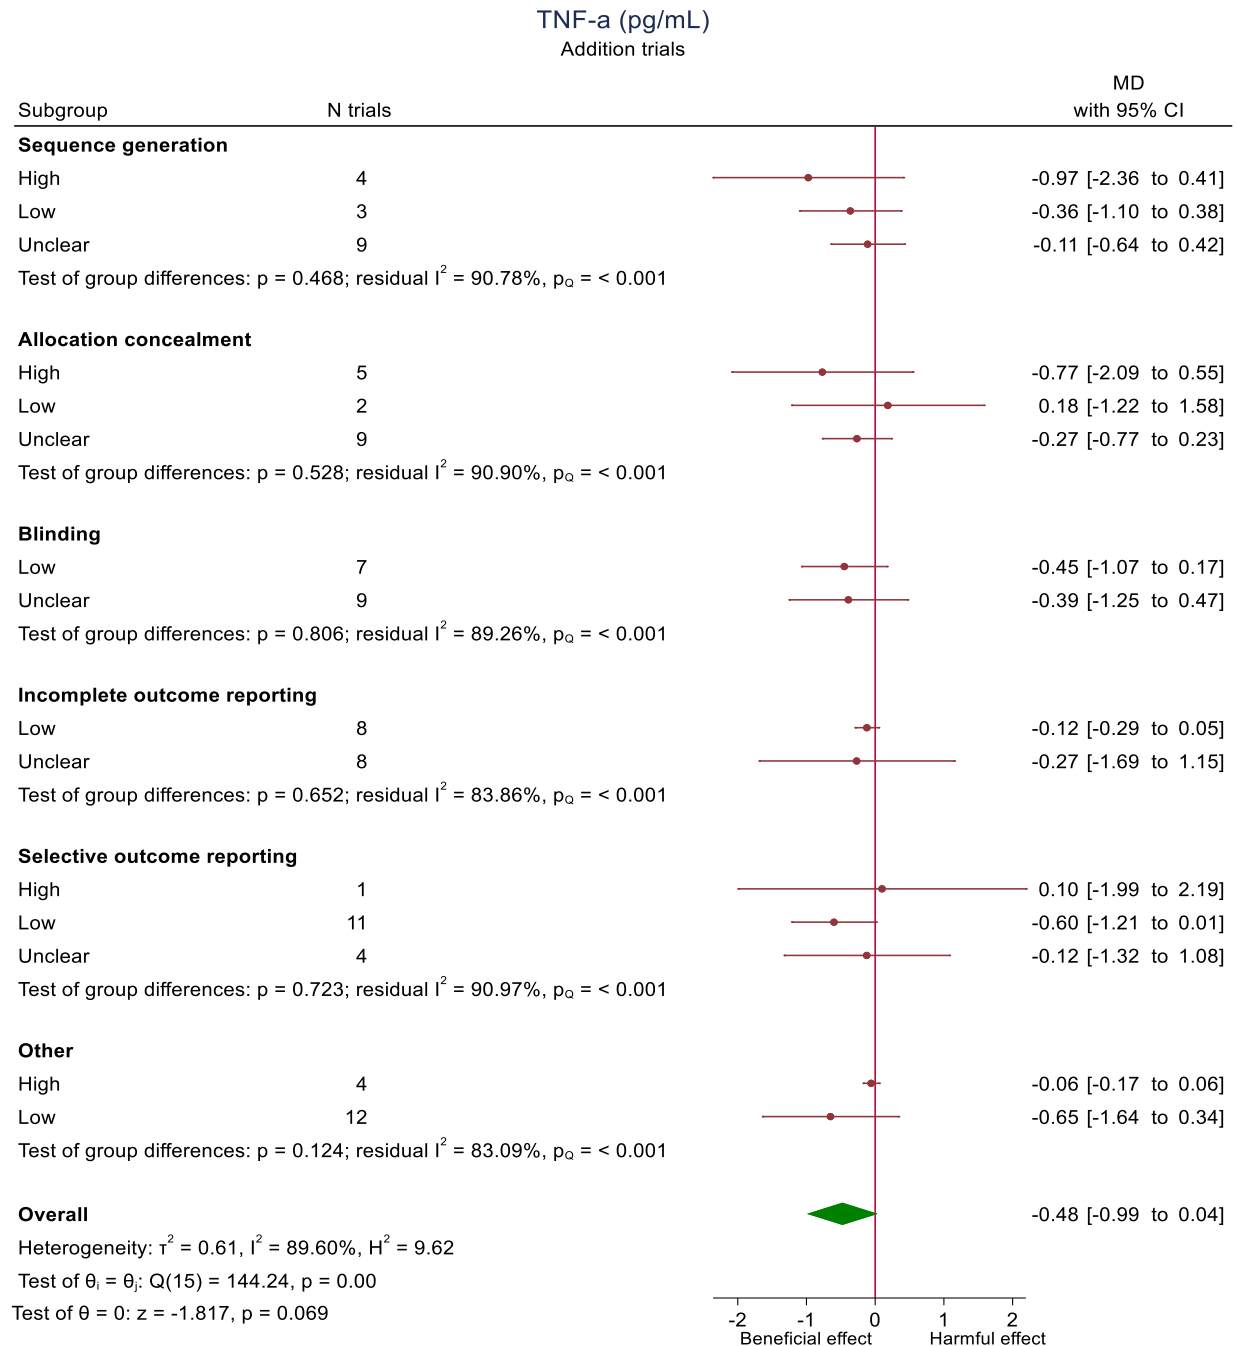

CI=confidence interval; MD= mean difference; TNF- $\alpha$  = tumour necrosis factor-alpha

The green diamond represents the pooled estimate for the overall primary analysis of food sources of fructose-containing sugars and CRP. Within subgroup mean differences are the pooled effect estimates represented by a red circle. 95% confidence intervals are represented by the line through the circle. Data are expressed as mean differences with 95% confidence intervals using the generic inverse-variance method and random effects DerSimonian-Laird model. Inter-study heterogeneity was assessed using the Cochrane Q statistic and quantified using the  $I^2$  statistic, with significance set at  $P_Q < 0.100$  and  $I^2 \geq 50\%$  considered to be evidence of substantial heterogeneity.  $P < 0.050$  indicates that the effect size differed between levels of the subgroup.



**Supplemental Figure S64 (part 1 of 3): Subgroup analyses for the effect of important food sources of fructose-containing sugars on IL-6 (pg/mL) in substitution trials**

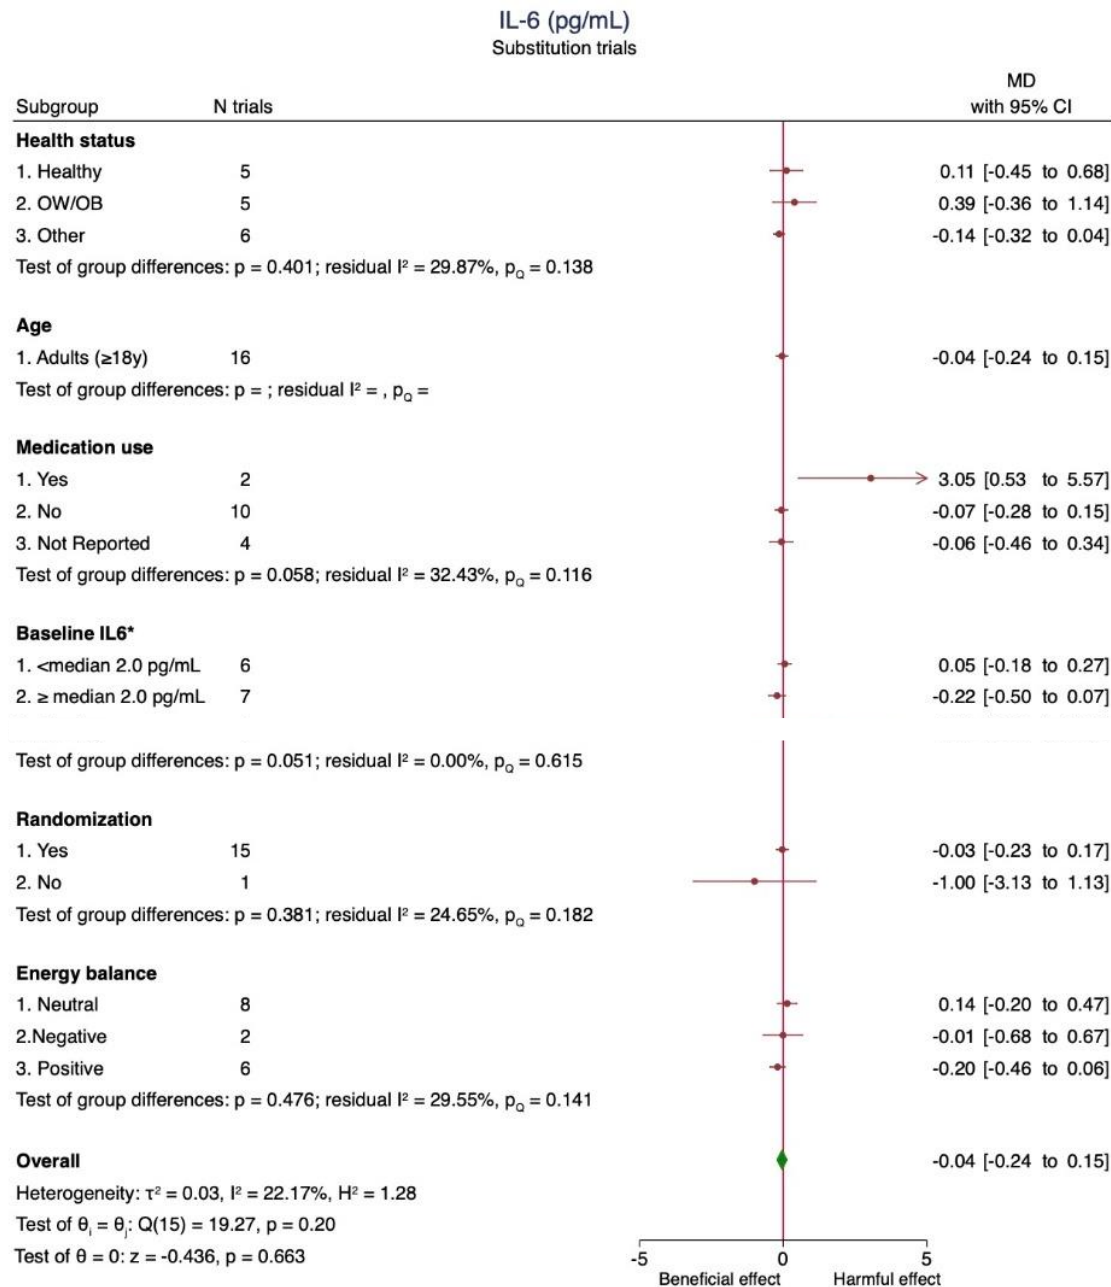

CI=confidence interval; MD= mean difference; OW/OB=overweight or obese; IL-6=interleukin-6; y=years

\*N=3 trials missing in baseline IL-6

The green diamond represents the pooled estimate for the overall primary analysis of food sources of fructose-containing sugars and CRP. Within subgroup mean differences are the pooled effect estimates represented by a red circle. 95% confidence intervals are represented by the line through the circle. Data are expressed as mean differences with 95% confidence intervals using the generic inverse-variance method and random effects DerSimonian-Laird model. Inter-study heterogeneity was assessed using the Cochrane Q statistic and quantified using the  $I^2$  statistic, with significance set at  $P_Q < 0.100$  and  $I^2 \geq 50\%$  considered to be evidence of substantial heterogeneity.  $P < 0.050$  indicates that the effect size differed between levels of the subgroup.

**Supplemental Figure S64 (part 2 of 3): Subgroup analyses for the effect of important food sources of fructose-containing sugars on IL-6 (pg/mL) in substitution trials**

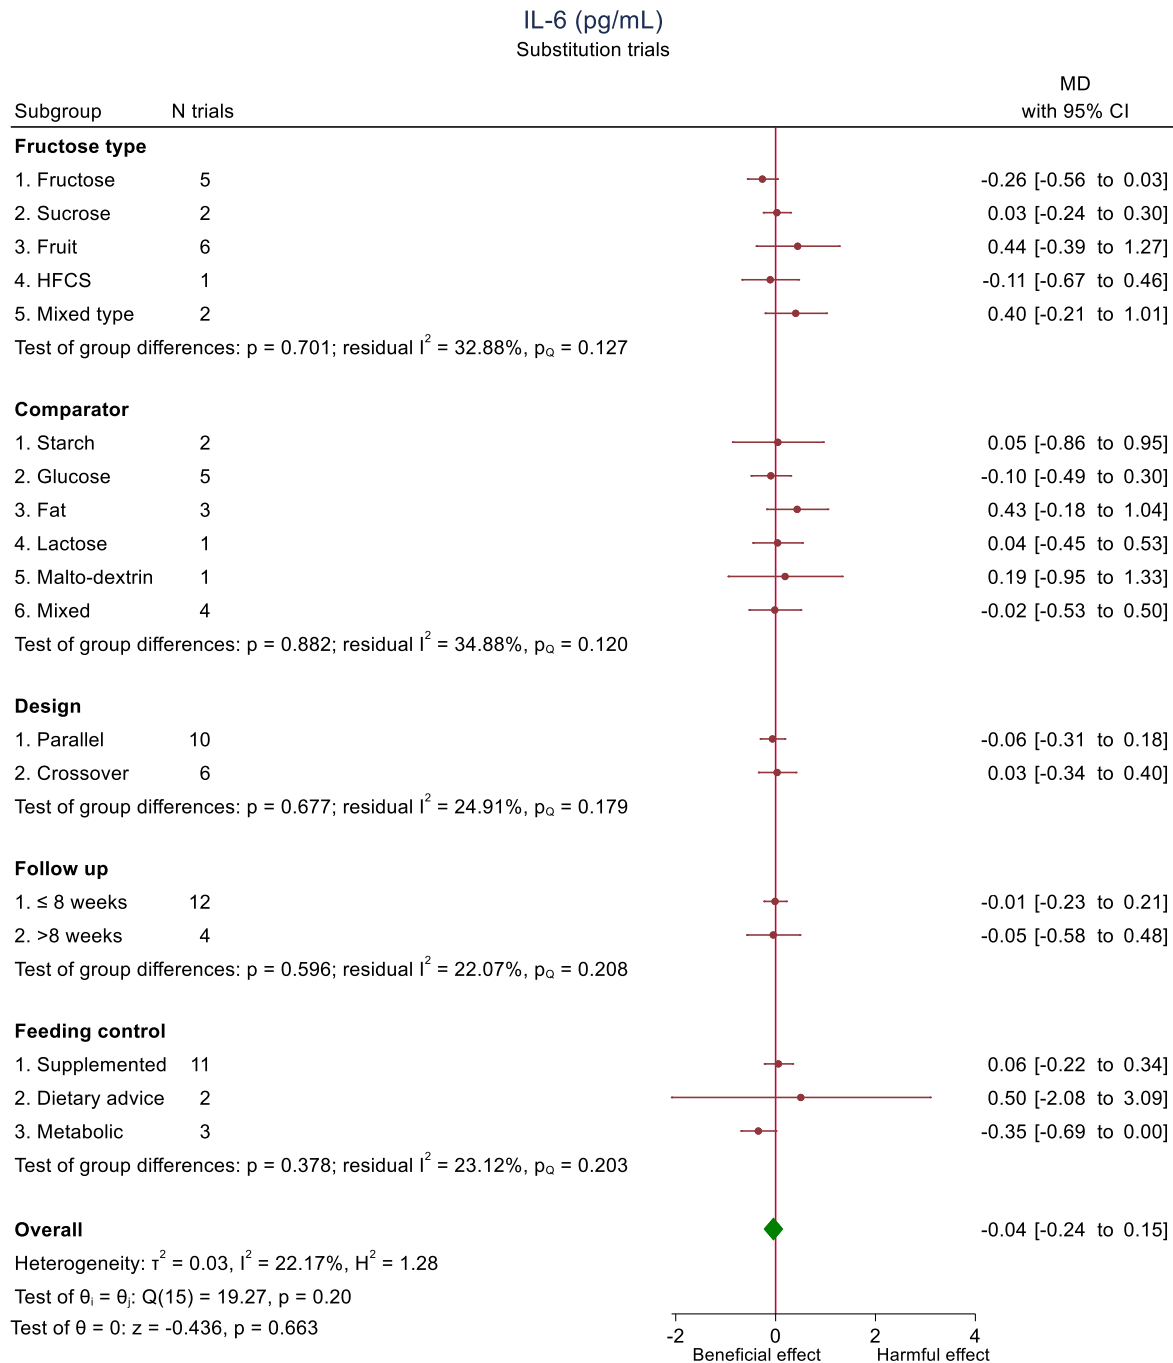

CI=confidence interval; MD= mean difference; HFCS= high fructose corn syrup; IL-6=interleukin-6

The green diamond represents the pooled estimate for the overall primary analysis of food sources of fructose-containing sugars and CRP. Within subgroup mean differences are the pooled effect estimates represented by a red circle. 95% confidence intervals are represented by the line through the circle. Data are expressed as mean differences with 95% confidence intervals using the generic inverse-variance method and random effects DerSimonian-Laird model. Inter-study heterogeneity was assessed using the Cochrane Q statistic and quantified using the  $I^2$  statistic, with significance set at  $P_Q < 0.100$  and  $I^2 \geq 50\%$  considered to be evidence of substantial heterogeneity.  $P < 0.050$  indicates that the effect size differed between levels of the subgroup.

**Supplemental Figure S64 (part 3 of 3): Subgroup analyses for the effect of important food sources of fructose-containing sugars on IL-6 (pg/mL) in substitution trials**

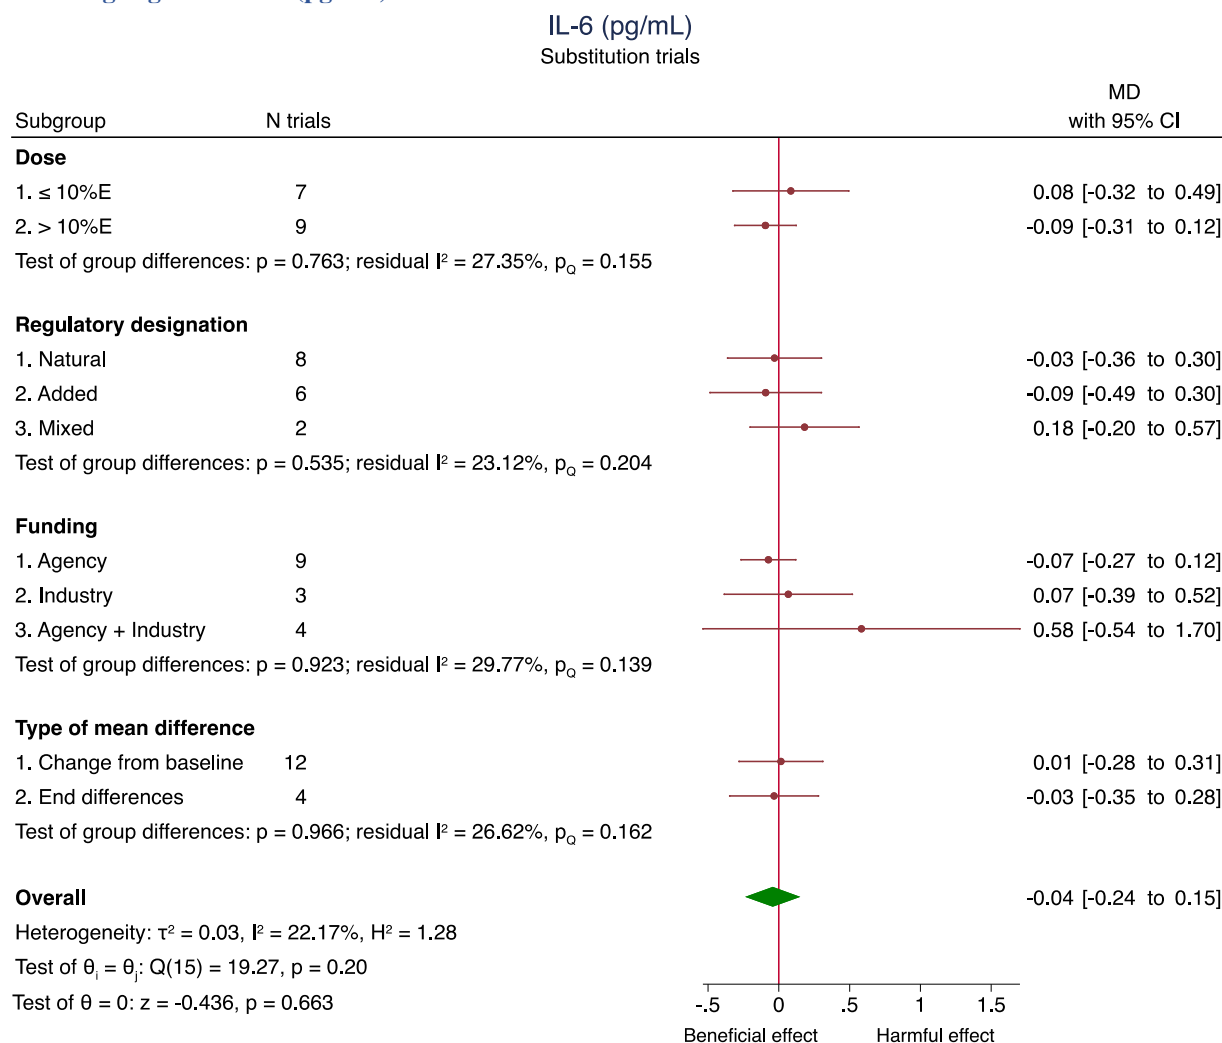

CI=confidence interval; E= energy; MD= mean difference; IL-6=interleukin-6

The green diamond represents the pooled estimate for the overall primary analysis of food sources of fructose-containing sugars and CRP. Within subgroup mean differences are the pooled effect estimates represented by a red circle. 95% confidence intervals are represented by the line through the circle. Data are expressed as mean differences with 95% confidence intervals using the generic inverse-variance method and random effects DerSimonian-Laird model. Inter-study heterogeneity was assessed using the Cochrane Q statistic and quantified using the  $I^2$  statistic, with significance set at  $P_Q < 0.100$  and  $I^2 \geq 50\%$  considered to be evidence of substantial heterogeneity.  $P < 0.050$  indicates that the effect size differed between levels of the subgroup.

**Supplemental Figure S65: Risk of bias (using The Cochrane Collaboration Tool) subgroup analysis for the effect of important food sources of fructose-containing sugars on IL-6 (pg/mL) in substitution trials**

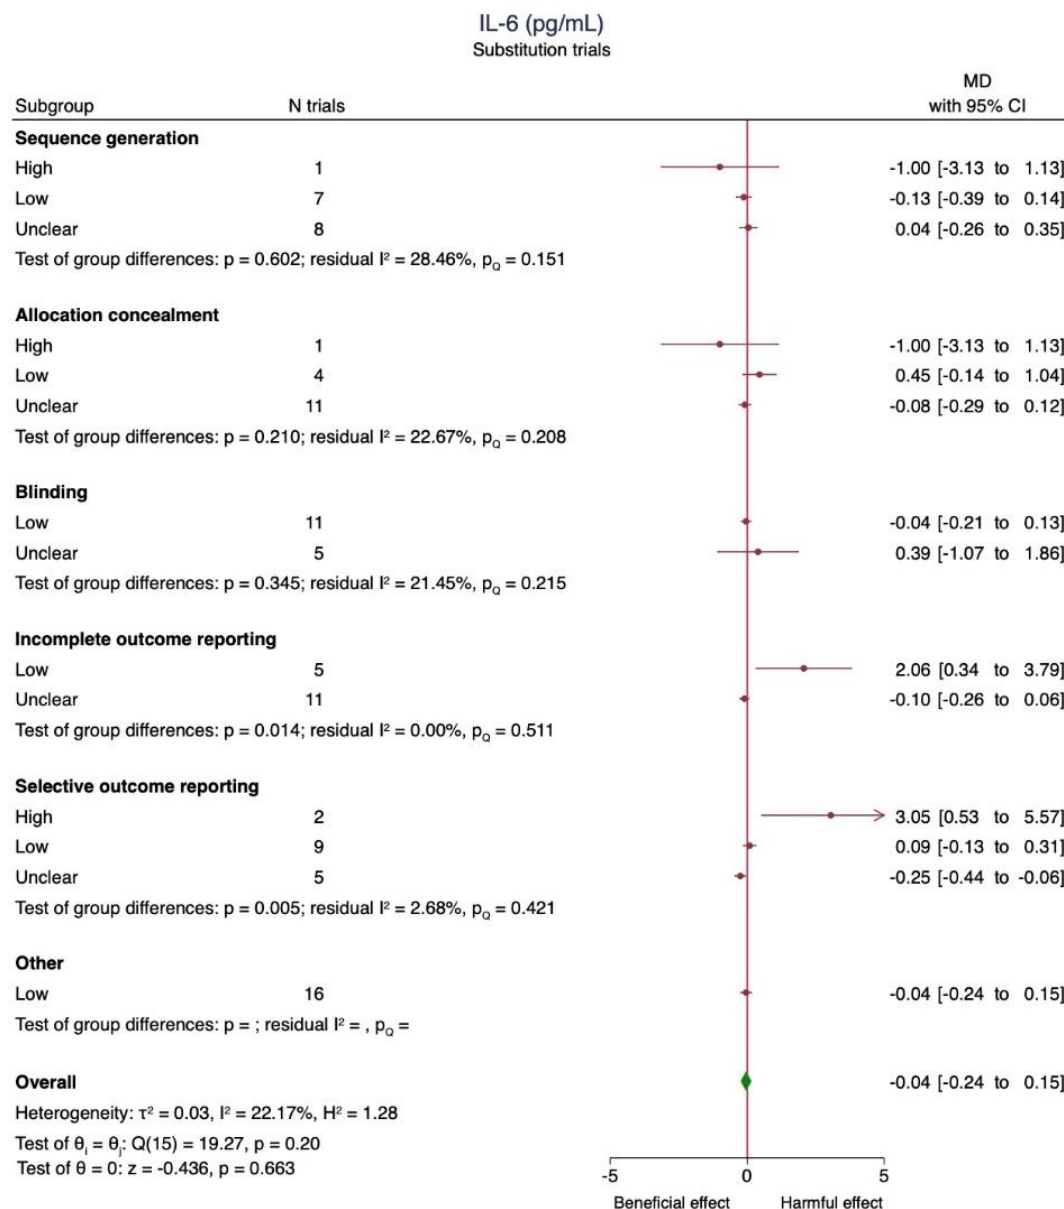

CI=confidence interval; MD= mean difference; HFCS= high fructose corn syrup; IL-6=interleukin-6  
The green diamond represents the pooled estimate for the overall primary analysis of food sources of fructose-containing sugars and CRP. Within subgroup mean differences are the pooled effect estimates represented by a red circle. 95% confidence intervals are represented by the line through the circle. Data are expressed as mean differences with 95% confidence intervals using the generic inverse-variance method and random effects DerSimonian-Laird model. Inter-study heterogeneity was assessed using the Cochrane Q statistic and quantified using the  $I^2$  statistic, with significance set at  $P_Q < 0.100$  and  $I^2 \geq 50\%$  considered to be evidence of substantial heterogeneity.  $P < 0.050$  indicates that the effect size differed between levels of the subgroup.

**Supplemental Figure S66 (part 1 of 3): Subgroup analyses for the effect of important food sources of fructose-containing sugars on IL-6 (pg/mL) in addition trials**

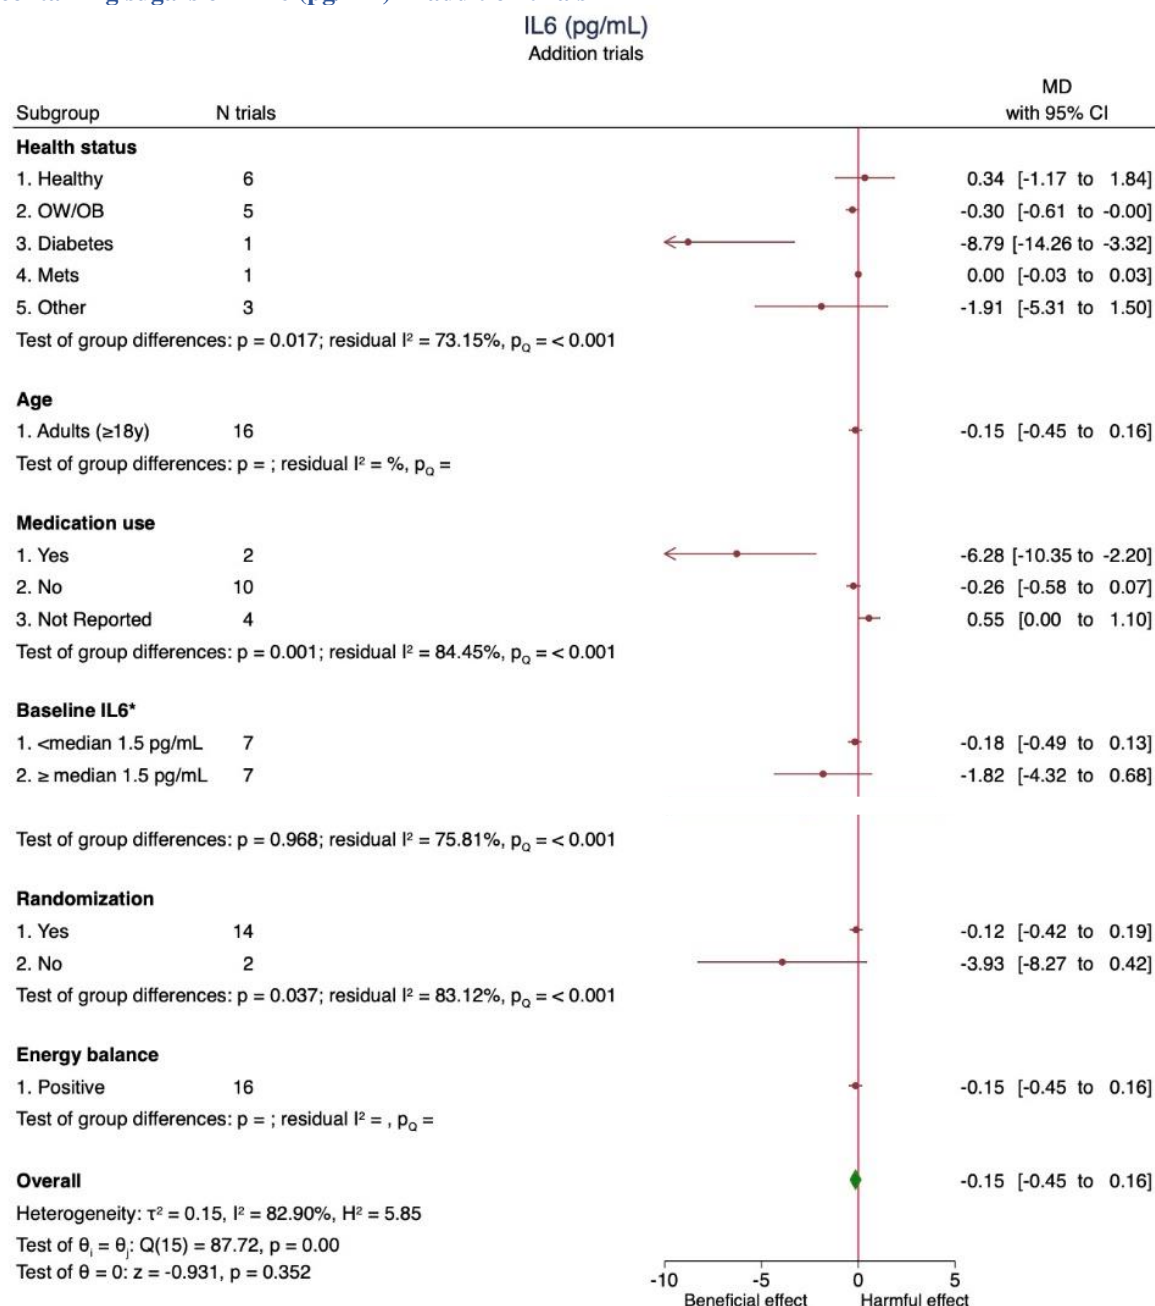

CI=confidence interval; MD= mean difference; Mets= Metabolic syndrome; OW/OB=overweight or obese; IL-6=interleukin-6

\*N=2 trials missing from baseline IL-6

The green diamond represents the pooled estimate for the overall primary analysis of food sources of fructose-containing sugars and CRP. Within subgroup mean differences are the pooled effect estimates represented by a red circle. 95% confidence intervals are represented by the line through the circle. Data are expressed as mean differences with 95% confidence intervals using the generic inverse-variance method and random effects DerSimonian-Laird model. Inter-study heterogeneity was assessed using the Cochrane Q statistic and quantified using the  $I^2$  statistic, with significance set at  $P_Q < 0.100$  and  $I^2 \geq 50\%$  considered to be evidence of substantial heterogeneity.  $P < 0.050$  indicates that the effect size differed between levels of the subgroup.

**Supplemental Figure S66 (part 2 of 3): Subgroup analyses for the effect of important food sources of fructose-containing sugars on IL-6 (pg/mL) in addition trials**

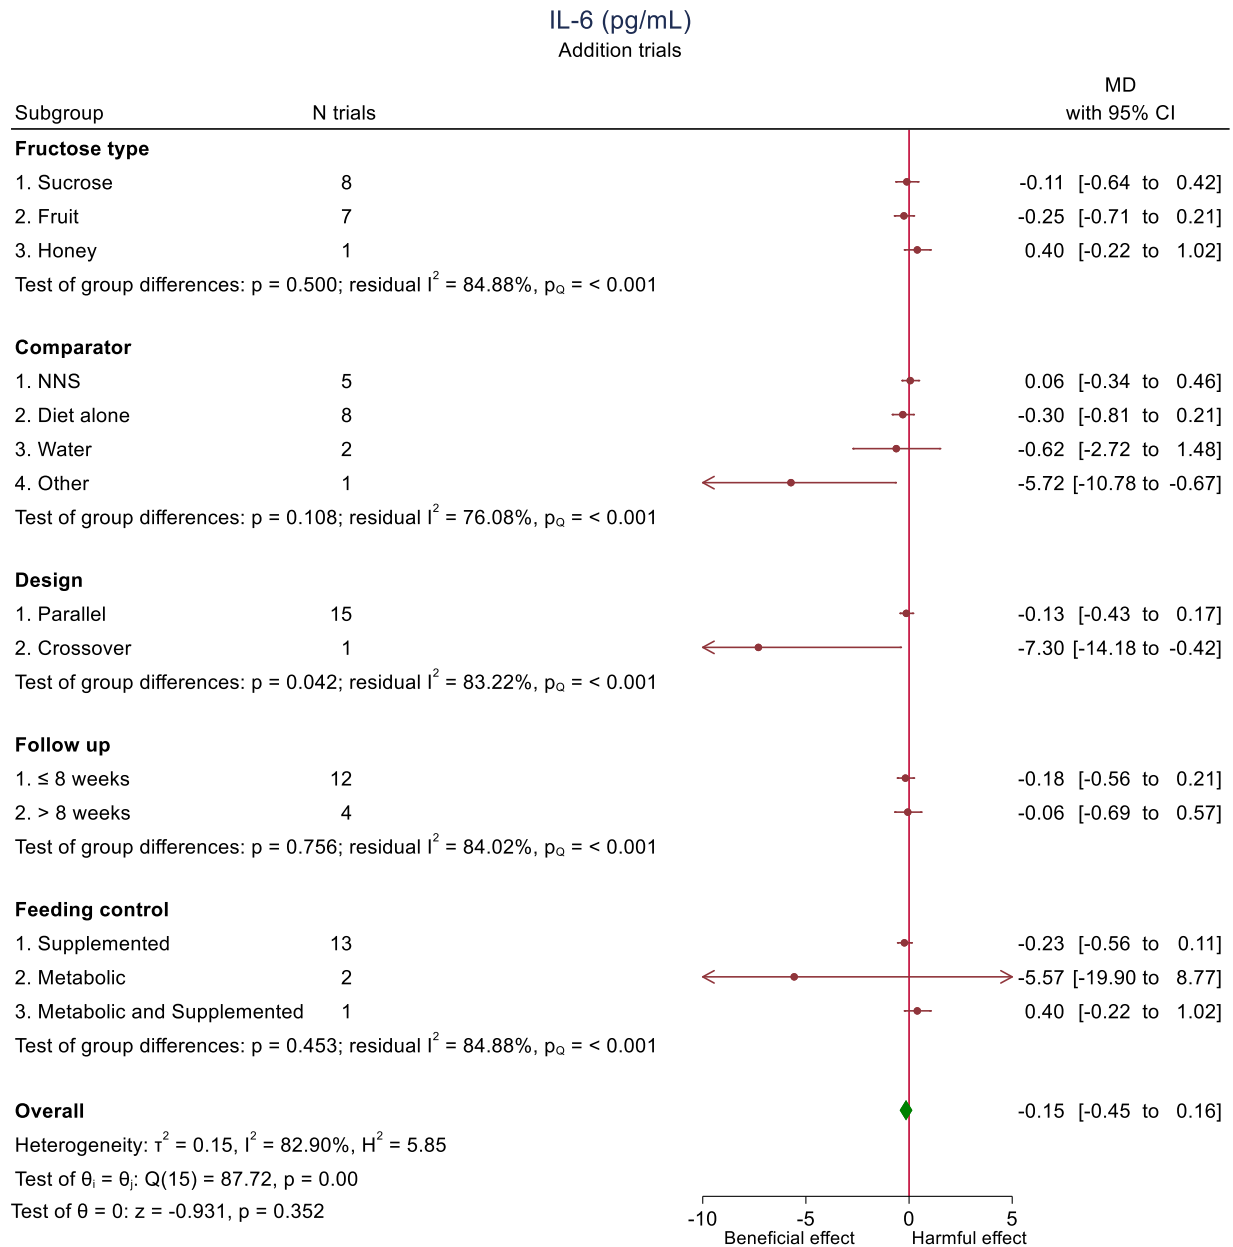

CI=confidence interval; MD= mean difference; HFCS= high fructose corn syrup; NNS= non-nutritive sweetener; IL-6=interleukin-6

The green diamond represents the pooled estimate for the overall primary analysis of food sources of fructose-containing sugars and CRP. Within subgroup mean differences are the pooled effect estimates represented by a red circle. 95% confidence intervals are represented by the line through the circle. Data are expressed as mean differences with 95% confidence intervals using the generic inverse-variance method and random effects DerSimonian-Laird model. Inter-study heterogeneity was assessed using the Cochrane Q statistic and quantified using the  $I^2$  statistic, with significance set at  $P_Q < 0.100$  and  $I^2 \geq 50\%$  considered to be evidence of substantial heterogeneity.  $P < 0.050$  indicates that the effect size differed between levels of the subgroup.

**Supplemental Figure S66 (part 3 of 3): Subgroup analyses for the effect of important food sources of fructose-containing sugars on IL-6 (pg/mL) in addition trials**

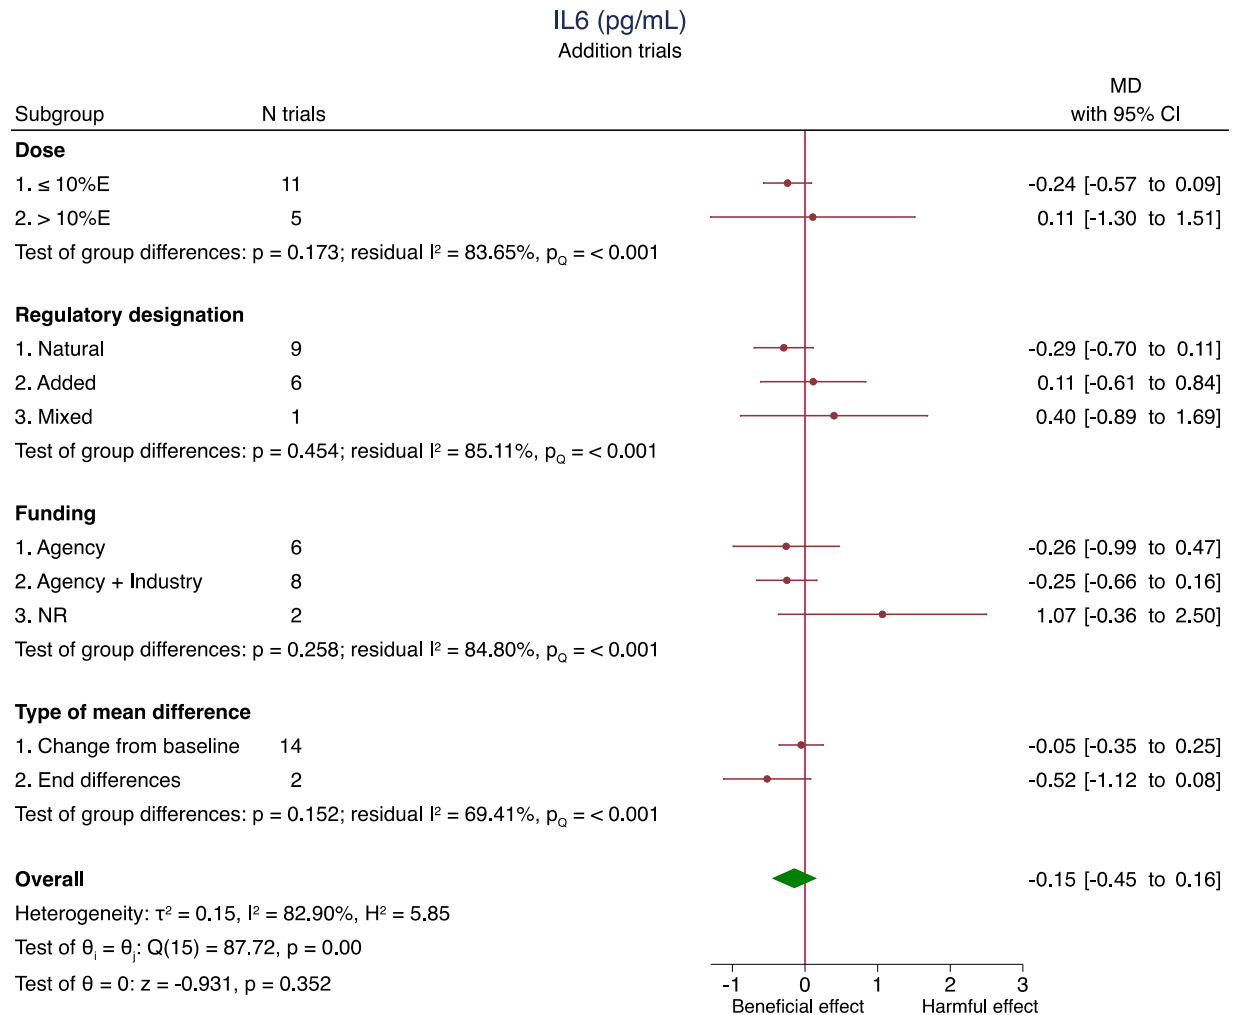

CI=confidence interval; E=energy; MD= mean difference; NR= not reported; IL-6=interleukin-6

The green diamond represents the pooled estimate for the overall primary analysis of food sources of fructose-containing sugars and CRP. Within subgroup mean differences are the pooled effect estimates represented by a red circle. 95% confidence intervals are represented by the line through the circle. Data are expressed as mean differences with 95% confidence intervals using the generic inverse-variance method and random effects DerSimonian-Laird model. Inter-study heterogeneity was assessed using the Cochrane Q statistic and quantified using the  $I^2$  statistic, with significance set at  $P_Q < 0.100$  and  $I^2 \geq 50\%$  considered to be evidence of substantial heterogeneity.  $P < 0.050$  indicates that the effect size differed between levels of the subgroup.

**Supplemental Figure S67: Risk of bias (using The Cochrane Collaboration Tool) subgroup analysis for the effect of important food sources of fructose-containing sugars on IL-6 (pg/mL) in addition trials**

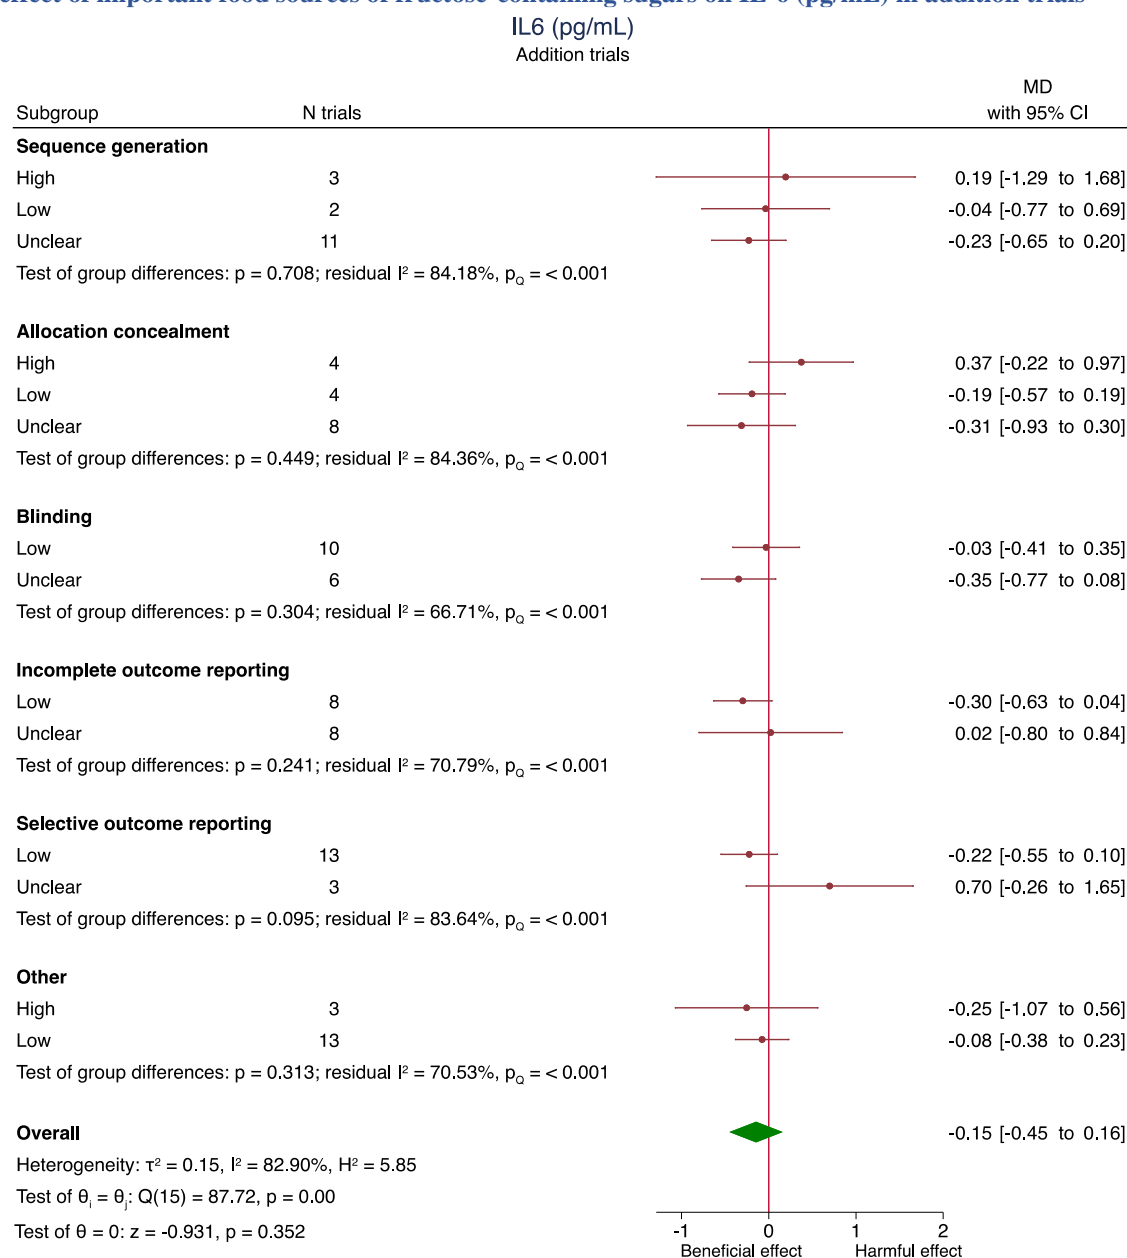

CI=confidence interval; MD= mean difference; IL-6=interleukin-6

The green diamond represents the pooled estimate for the overall primary analysis of food sources of fructose-containing sugars and CRP. Within subgroup mean differences are the pooled effect estimates represented by a red circle. 95% confidence intervals are represented by the line through the circle. Data are expressed as mean differences with 95% confidence intervals using the generic inverse-variance method and random effects DerSimonian-Laird model. Inter-study heterogeneity was assessed using the Cochrane Q statistic and quantified using the  $I^2$  statistic, with significance set at  $P_Q < 0.100$  and  $I^2 \geq 50\%$  considered to be evidence of substantial heterogeneity.  $P < 0.050$  indicates that the effect size differed between levels of the subgroup.



**Supplemental Figure S68: Continuous meta-regression analysis for the effect of important food sources of fructose-containing sugars on TNF- $\alpha$  (pg/mL) in substitution trials.**

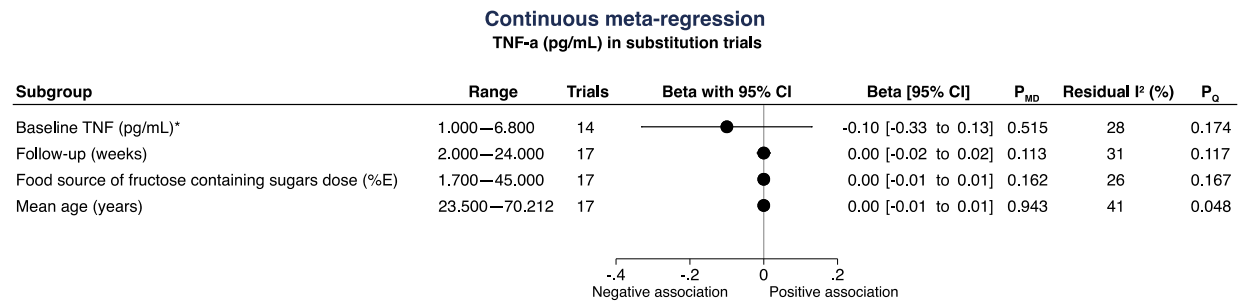

CI=confidence interval; %E=percentage of total energy intake; TNF- $\alpha$ = Tumour necrosis factor-alpha  
 Data is presented as between group mean difference (95% confidence intervals) for a 1-unit change in the predictor variable.  $\beta$ -coefficients were estimated using continuous meta-regression analysis. A positive  $\beta$ -coefficient implies an increase in TNF- $\alpha$  with the food source of fructose-containing sugars intervention as the subgroup variable increases, and a negative  $\beta$ -coefficient implies a decrease in uric acid. Residual I<sup>2</sup> reports inter-study heterogeneity not explained by the subgroup and was estimated using the Cochrane Q statistic.  
 \* N=3 trials missing data for baseline TNF- $\alpha$

**Supplemental Figure S69: Continuous meta-regression analysis for the effect of important food sources of fructose-containing sugars on TNF- $\alpha$  (pg/mL) in addition trials**

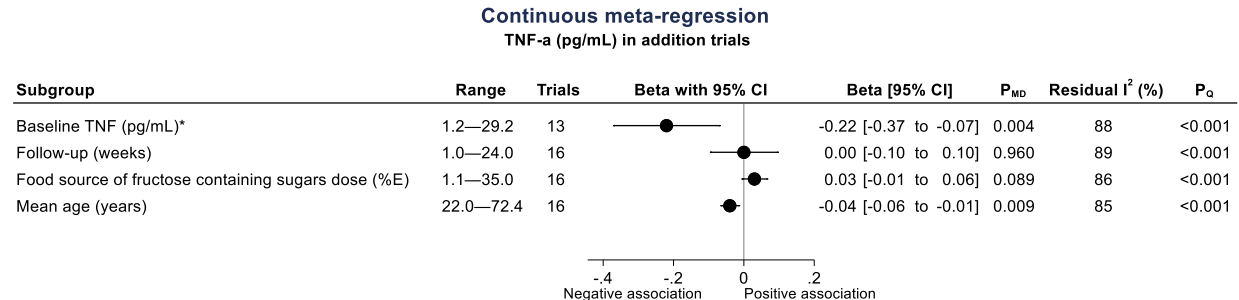

CI=confidence interval; %E=percentage of total energy intake; TNF- $\alpha$ = Tumour necrosis factor-alpha  
 Data is presented as between group mean difference (95% confidence intervals) for a 1-unit change in the predictor variable.  $\beta$ -coefficients were estimated using continuous meta-regression analysis. A positive  $\beta$ -coefficient implies an increase in TNF- $\alpha$  with the food source of fructose-containing sugars intervention as the subgroup variable increases, and a negative  $\beta$ -coefficient implies a decrease in uric acid. Residual I<sup>2</sup> reports inter-study heterogeneity not explained by the subgroup and was estimated using the Cochrane Q statistic.  
 \* N=4 trials missing data for baseline TNF- $\alpha$

**Supplemental Figure S70: Continuous meta-regression analysis for the effect of important food sources of fructose-containing sugars on IL-6 (pg/mL) in substitution trials**

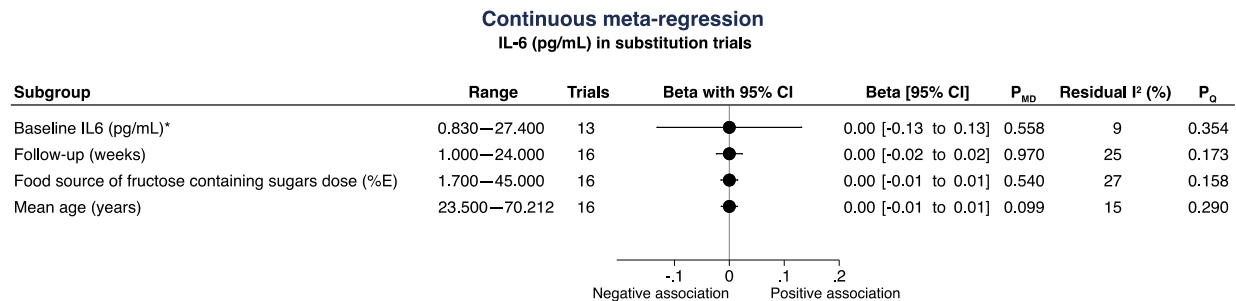

CI=confidence interval; %E=percentage of total energy intake; IL-6= interleukin-6

Data is presented as between group mean difference (95% confidence intervals) for a 1-unit change in the predictor variable.  $\beta$ -coefficients were estimated using continuous meta-regression analysis. A positive  $\beta$ -coefficient implies an increase in IL6 with the food source of fructose-containing sugars intervention as the subgroup variable increases, and a negative  $\beta$ -coefficient implies a decrease in uric acid. Residual I<sup>2</sup> reports inter-study heterogeneity not explained by the subgroup and was estimated using the Cochrane Q statistic.

\* N=3 trials missing data for baseline IL-6

**Supplemental Figure S71: Continuous meta-regression analysis for the effect of important food sources of fructose-containing sugars on IL-6 (pg/mL) in addition comparisons**

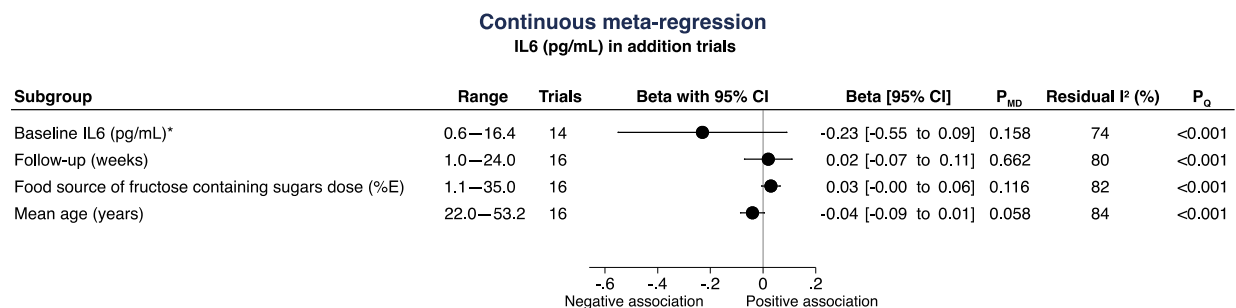

CI=confidence interval; %E=percentage of total energy intake; IL-6= interleukin-6

Data is presented as between group mean difference (95% confidence intervals) for a 1-unit change in the predictor variable.  $\beta$ -coefficients were estimated using continuous meta-regression analysis. A positive  $\beta$ -coefficient implies an increase in IL-6 with the food source of fructose-containing sugars intervention as the subgroup variable increases, and a negative  $\beta$ -coefficient implies a decrease in uric acid. Residual I<sup>2</sup> reports inter-study heterogeneity not explained by the subgroup and was estimated using the Cochrane Q statistic.

\* N=2 trials missing data for baseline IL-6

**Supplemental Figure S72: Linear and non-linear meta-regression analyses for effect of important food sources of fructose-containing sugars on CRP (mg/L) in substitution trials**

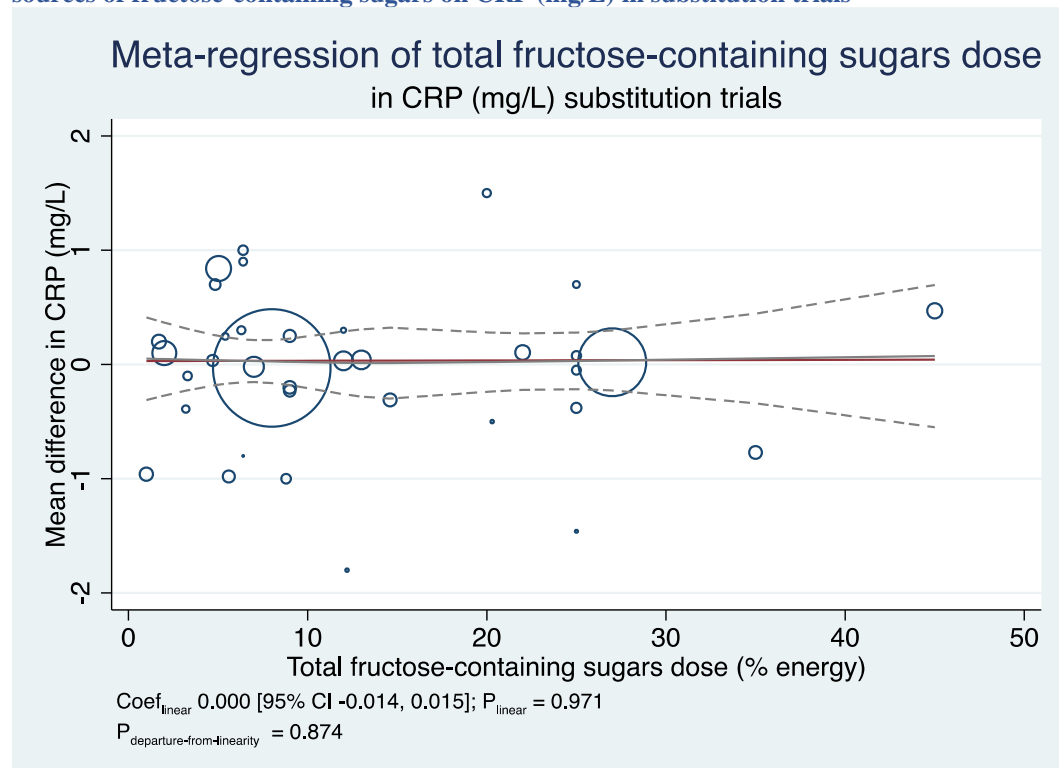

CI=confidence interval; coef=coefficient; E=energy; CRP= C reactive protein

Individual trials are represented by the circles, with their weight in the overall analysis represented by the size of the circles. The straight line represents the estimate dose response for amount of fructose-containing sugars consumed (% of total energy intake) and the dashed lines represent the upper and lower 95% confidence intervals.

**Supplemental Figure S73: Linear and non-linear meta-regression analysis for the effect of important food sources of fructose-containing sugars on CRP (mg/L) in addition comparisons**

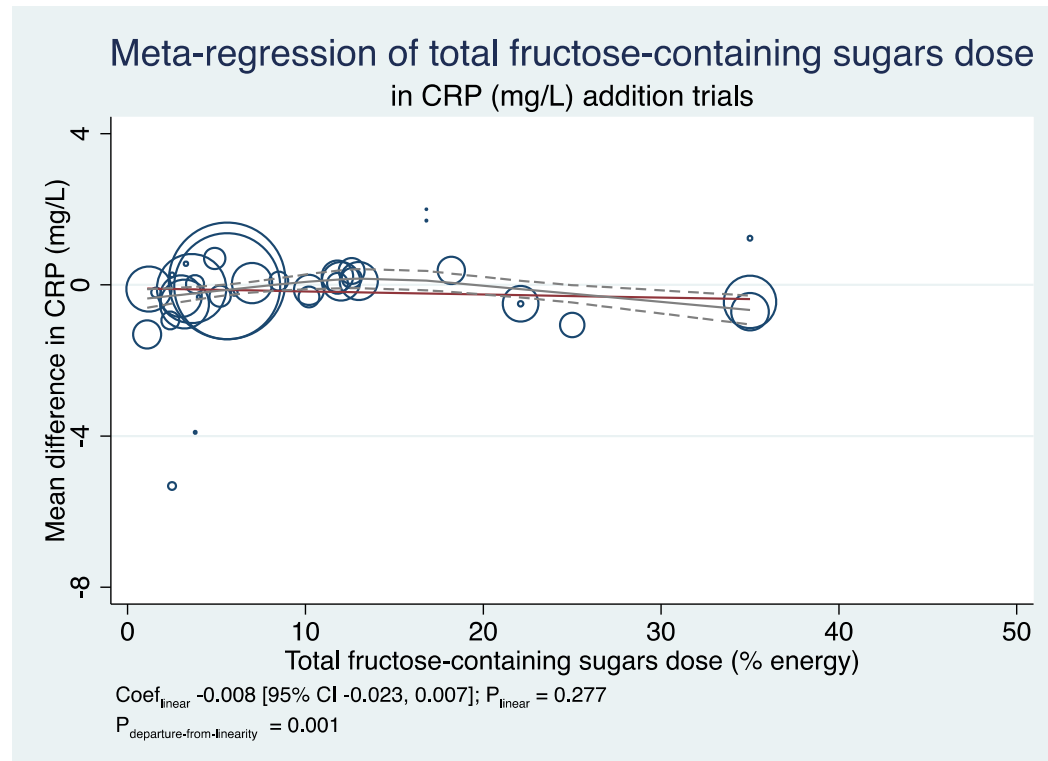

CI=confidence interval; coef=coefficient; E=energy; CRP= C reactive protein

Individual trials are represented by the circles, with their weight in the overall analysis represented by the size of the circles. The straight line represents the estimate dose response for amount of fructose-containing sugars consumed (% of total energy intake) and the dashed lines represent the upper and lower 95% confidence intervals.

**Supplemental Figure S74: Linear and non-linear meta-regression analyses for the effect of individual food sources of fructose-containing sugars dose on CRP (mg/L) in substitution trials**

**A:**

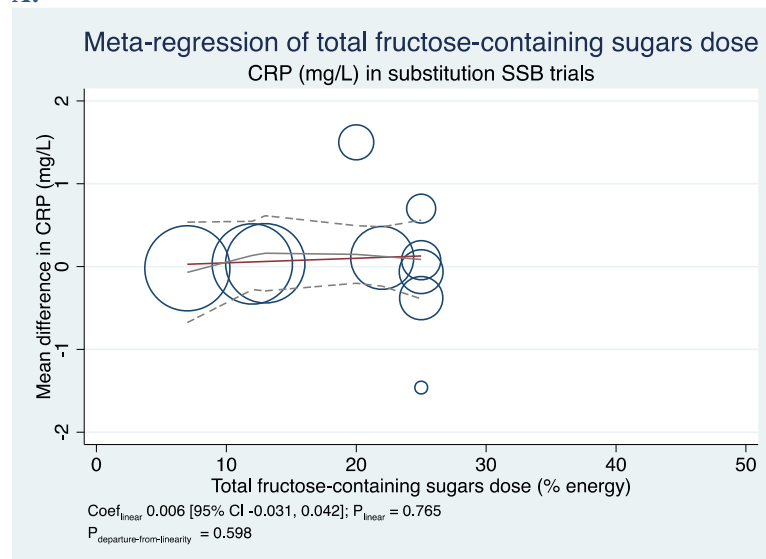

CI=confidence interval; coef=coefficient; CRP = C reactive protein; SSB= sugar sweetened beverage

Individual trials are represented by the circles, with their weight in the overall analysis represented by the size of the circles. The straight line represents the estimate dose response for amount of fructose-containing sugars consumed (% of total energy intake) and the dashed lines represent the upper and lower 95% confidence intervals.

Panel A= SSB

Linear and non-linear dose response analyses were not possible for sweetened dairy; sweetened dairy alternatives (soy); 100% fruit juice; fruit; dried fruit; mixed fruit forms; added nutritive (caloric) sweetener; mixed sources (with SSBs); and mixed sources (no SSBs) as there were fewer than six trial comparisons with dose data available.

Supplemental Figure S75: Linear and non-linear meta-regression analyses for the effect of individual food sources of fructose-containing sugars dose on CRP (mg/L) in addition trials

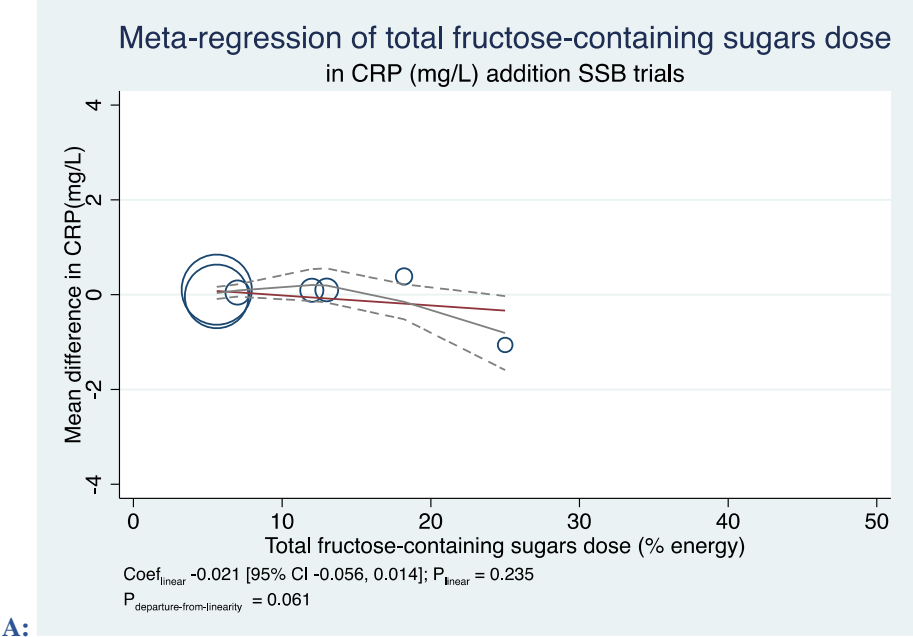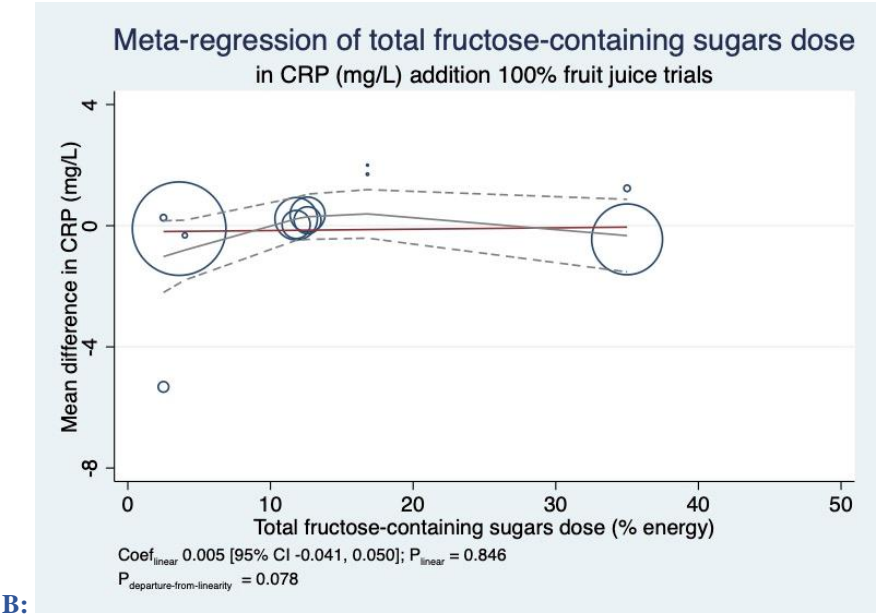

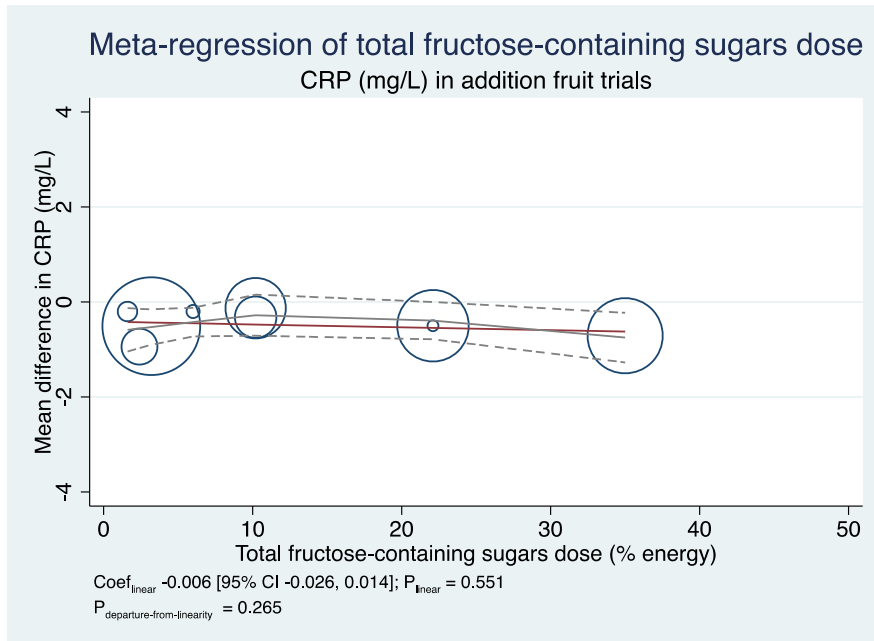

C:

CI=confidence interval; coef=coefficient; CRP = C reactive protein; SSB= sugar sweetened beverage  
Individual trials are represented by the circles, with their weight in the overall analysis represented by the size of the circles. The straight line represents the estimate dose response for amount of fructose-containing sugars consumed (% of total energy intake) and the dashed lines represent the upper and lower 95% confidence intervals.  
Panel A= SSB; B= 100% fruit juice; C= fruit  
Linear and non-linear dose response analyses were not possible for sweetened dairy alternatives (soy); dried fruit; mixed fruit forms; sweetened cereal grains and bars; sweets and desserts; added nutritive (caloric) sweetener as there were fewer than six trial comparisons with dose data available.

**Supplemental Figure S76: Non-linear dose-response analysis using public thresholds of 5% (panel A), 10% (panel B), and 25% (panel C) of energy for the effect of total food sources of fructose-containing sugars on CRP (mg/L) in substitution trials**

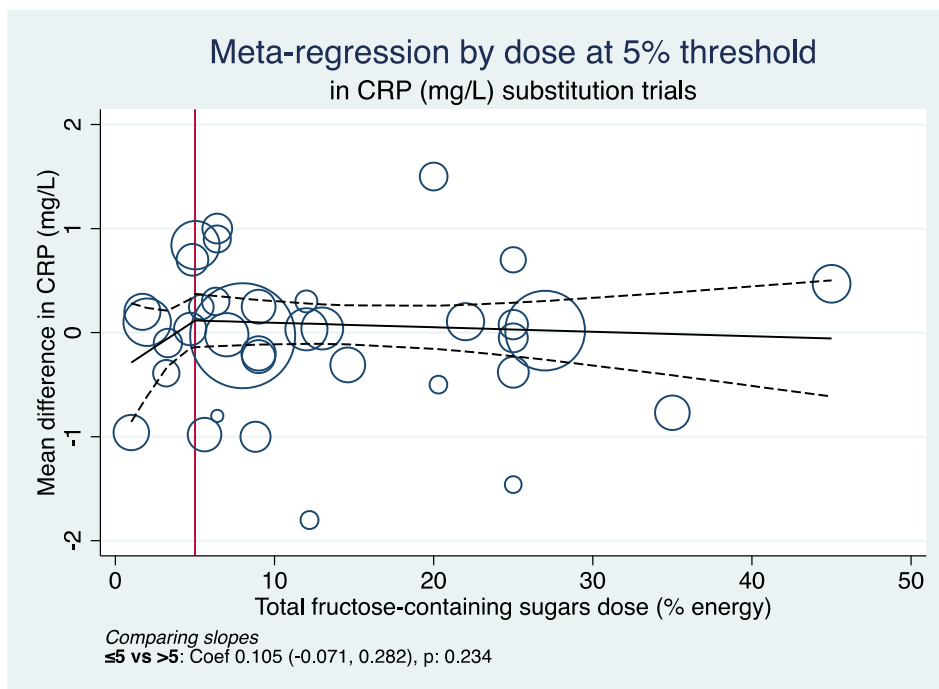

A:

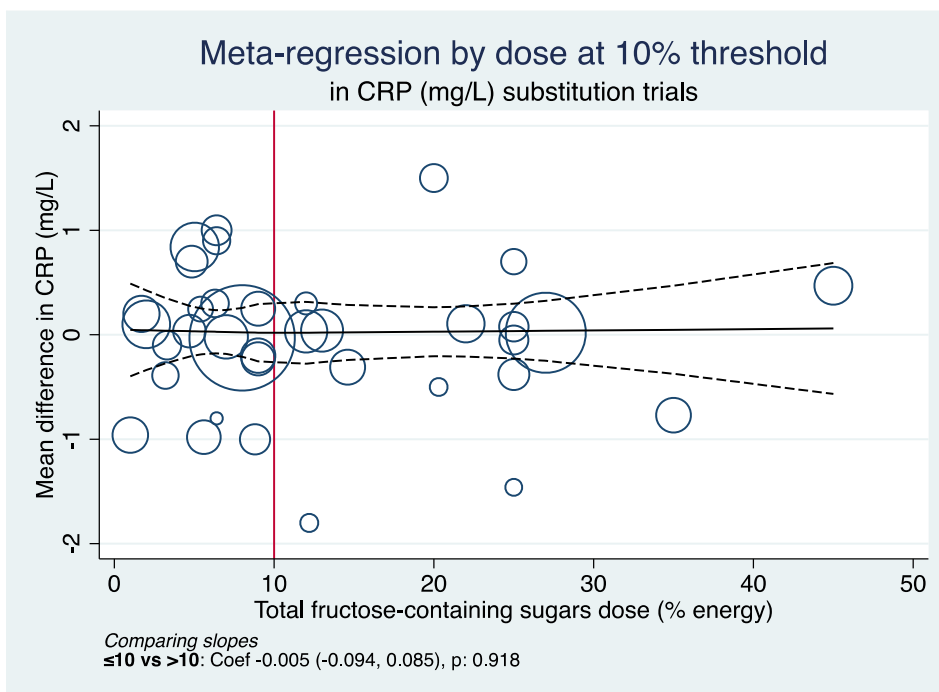

B:



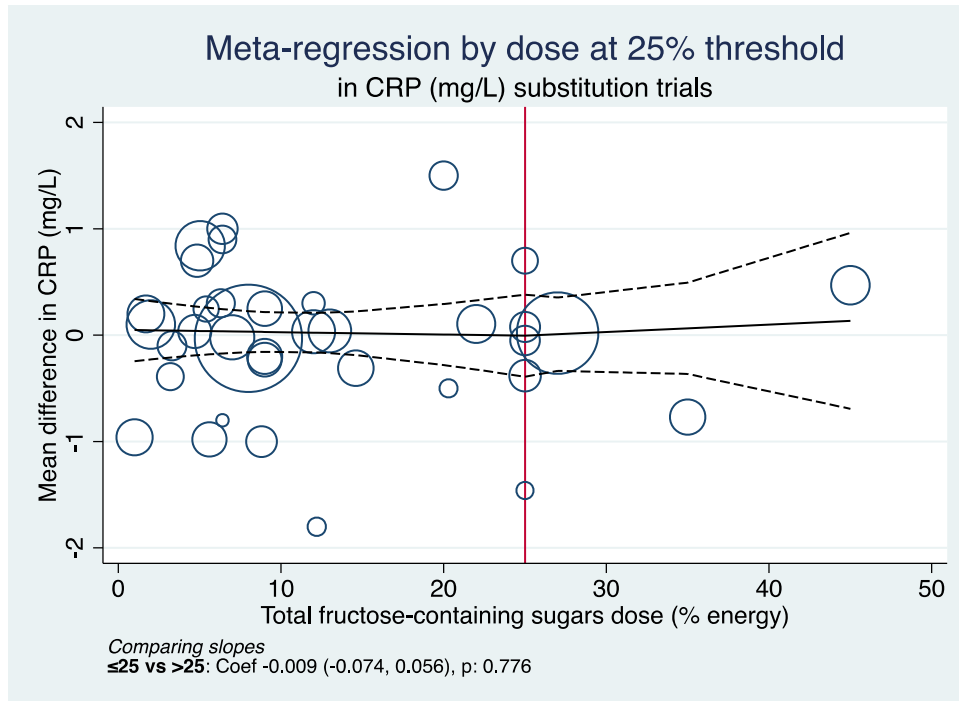

C:

Coef=coefficient; %E=percentage of total energy intake; CRP= C reactive protein; p-val= p-value  
Individual trials are represented by the circles, with their weight in the overall analysis represented by the size of the circles. The straight line represents the estimate dose response for amount of fructose-containing sugars consumed (% of total energy intake) and the dashed lines represent the upper and lower 95% confidence intervals.  
Panel A: 5% threshold; B: 10% threshold; C: 25% threshold.

Supplemental Figure S77: Non-linear dose-response analysis using public threshold of of 5% (panel A), 10% (panel B), and 25% (panel C) energy for the effect of important food sources of fructose-containing sugars on CRP (mg/L) in addition trials

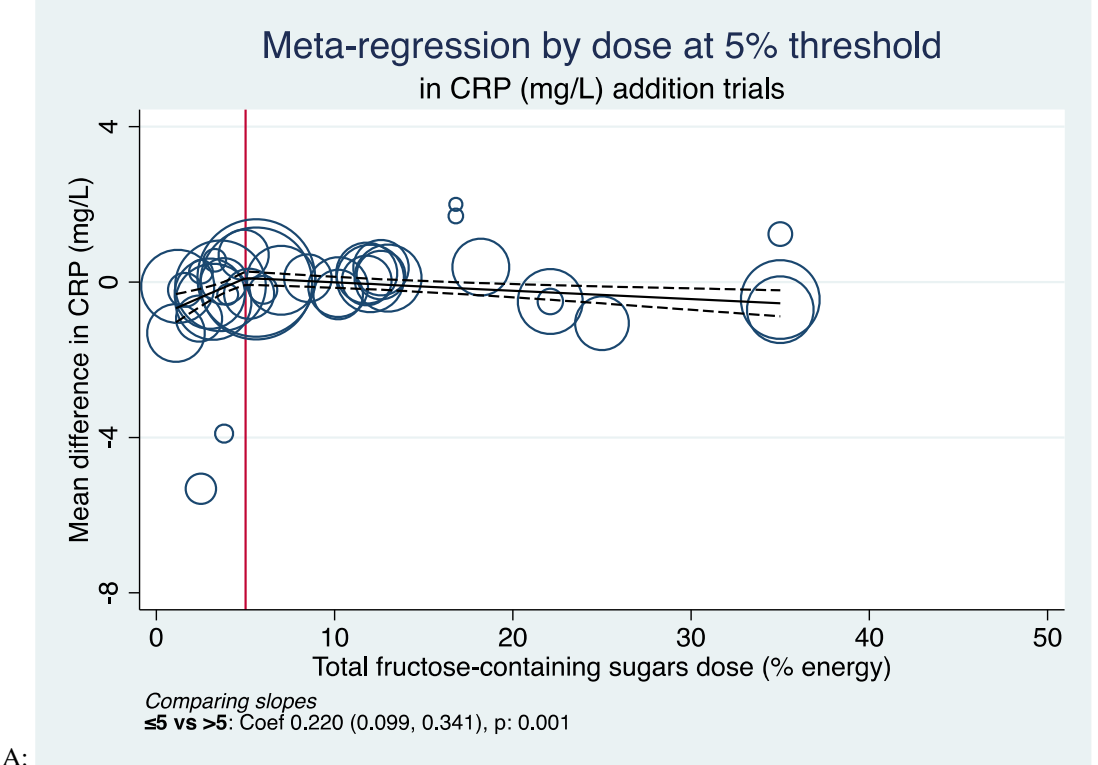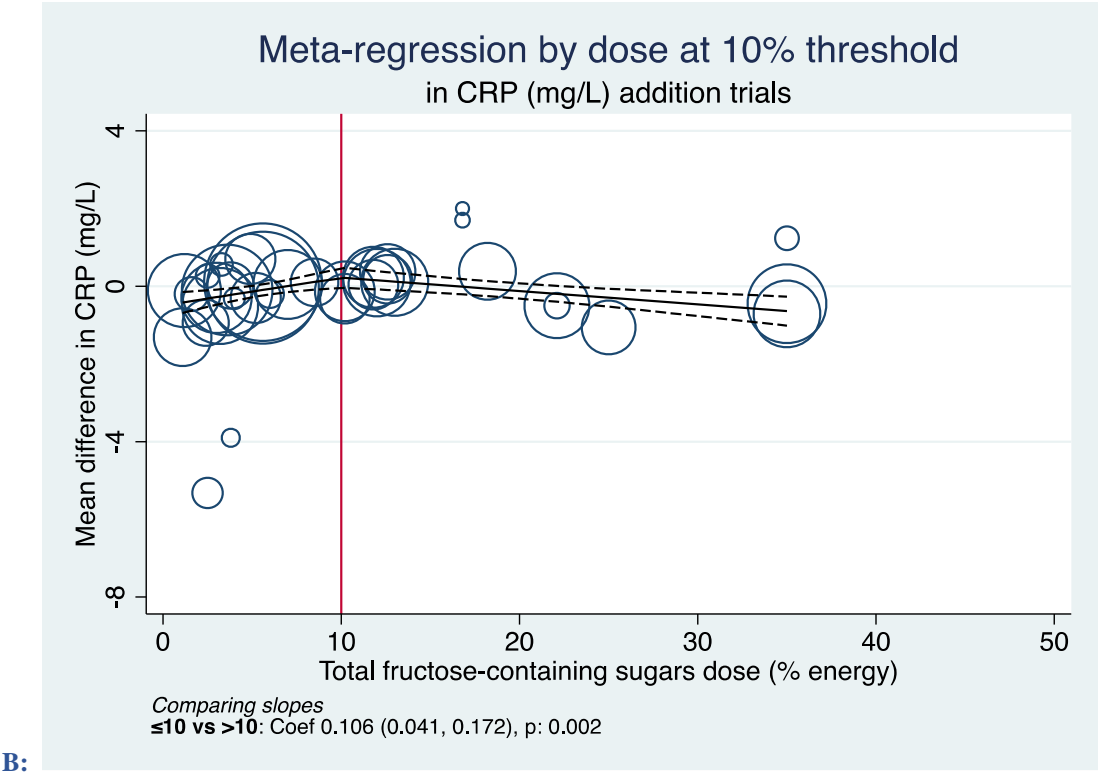

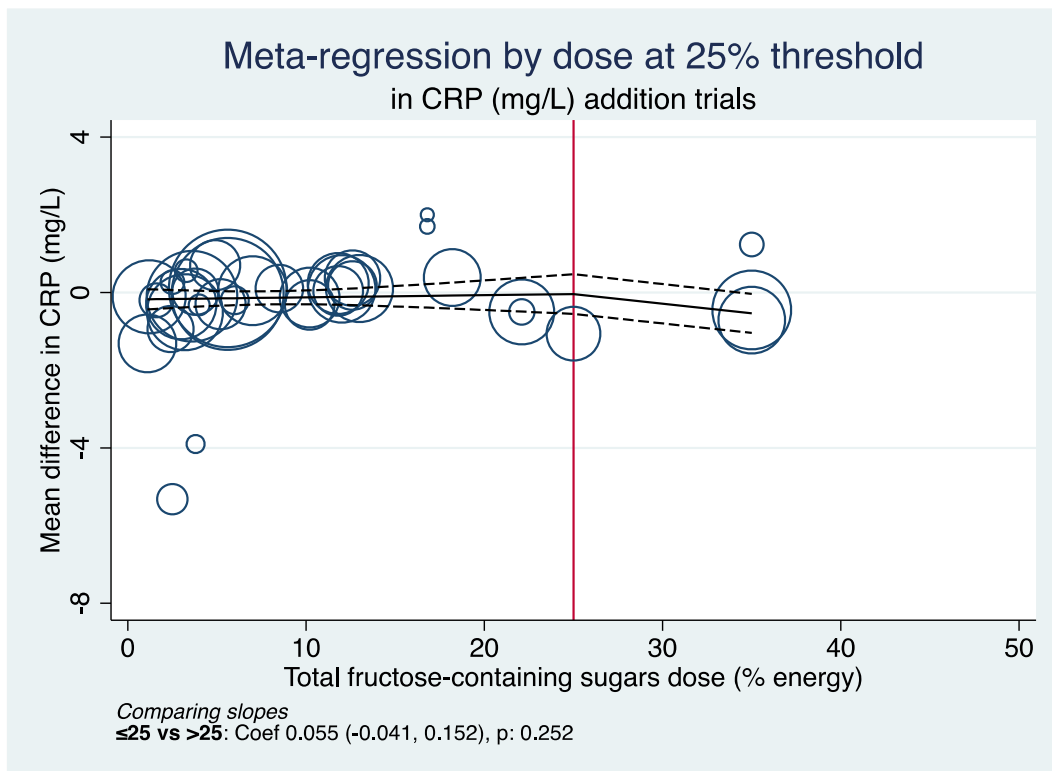

C:

Coef=coefficient; %E=percentage of total energy intake; CRP= C reactive protein; p-val= p-value  
 Individual trials are represented by the circles, with their weight in the overall analysis represented by the size of the circles. The straight line represents the estimate dose response for amount of fructose-containing sugars consumed (% of total energy intake) and the dashed lines represent the upper and lower 95% confidence intervals.  
 Panel A: 5% threshold; B: 10% threshold; C: 25% threshold.

**Supplemental Figure S78: Non-linear dose-response analysis using public thresholds of 10% (panel A) of energy for the effect of the effect of SSBs on CRP (mg/L) in substitution trials**

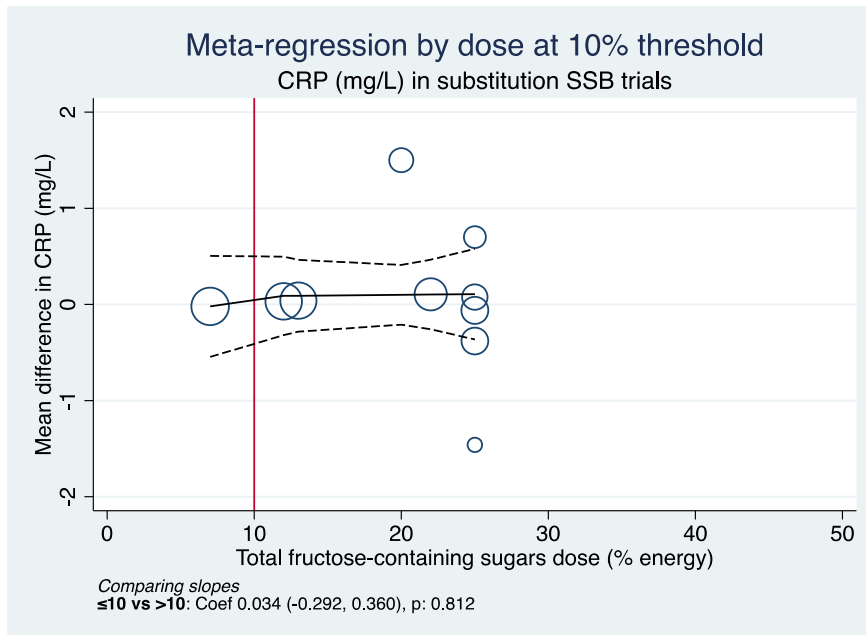

A:

Coef=coefficient; CRP= C reactive protein; %E=percentage of total energy intake; p-val=p-value; SSB=sugar-sweetened beverage

Individual trials are represented by the circles, with their weight in the overall analysis represented by the size of the circles. The straight line represents the estimate dose response for amount of fructose-containing sugars consumed (% of total energy intake) and the dashed lines represent the upper and lower 95% confidence intervals.

Panel A: 10% threshold

No trial comparisons with a dose for less than 5% nor greater than 25% were available

**Supplemental Figure S79: Non-linear dose-response analysis using public thresholds of 5%, 10% , and 25% of energy for the effect of the effect of SSBs on CRP (mg/L) in addition trials**

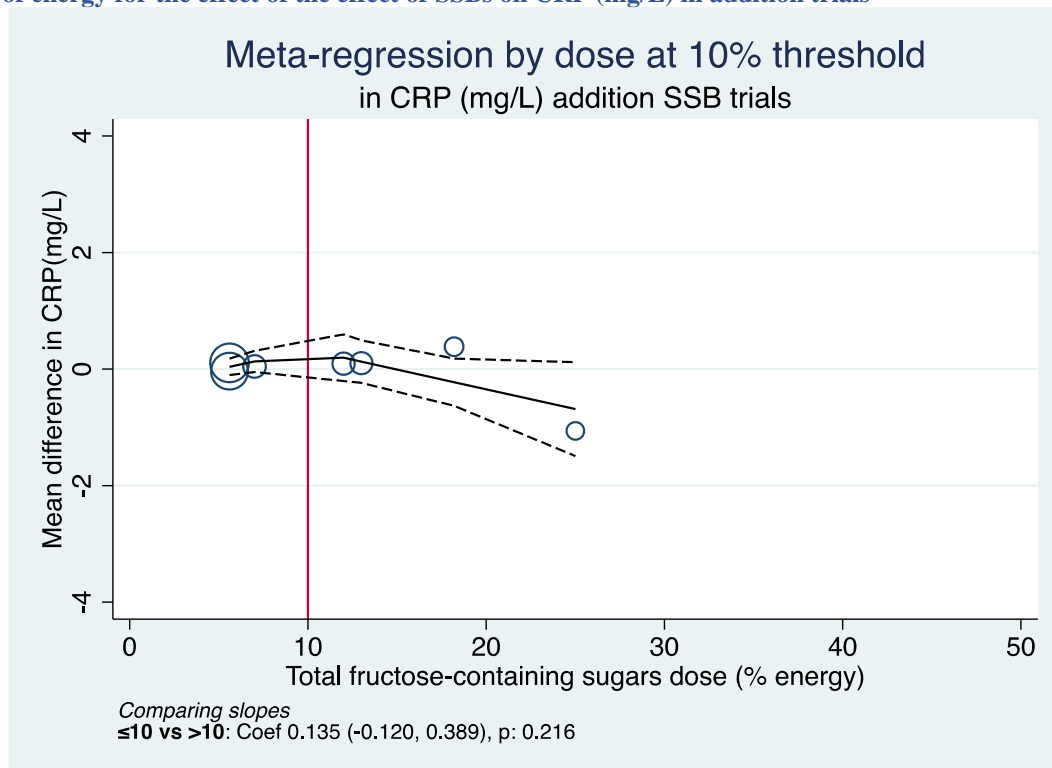

Coef=coefficient; CRP= C reactive protein; %E=percentage of total energy intake; p-val=p-value; SSB=sugar-sweetened beverage

Individual trials are represented by the circles, with their weight in the overall analysis represented by the size of the circles. The straight line represents the estimate dose response for amount of fructose-containing sugars consumed (% of total energy intake) and the dashed lines represent the upper and lower 95% confidence intervals.

Panel A: 10% threshold

No trial comparisons with a dose for less than 5% nor greater than 25% were available

Supplemental Figure S80: Non-linear dose-response analysis using public thresholds of 5%, 10% , and 25% of energy for the effect of 100% fruit juice on CRP (mg/L) in addition trials

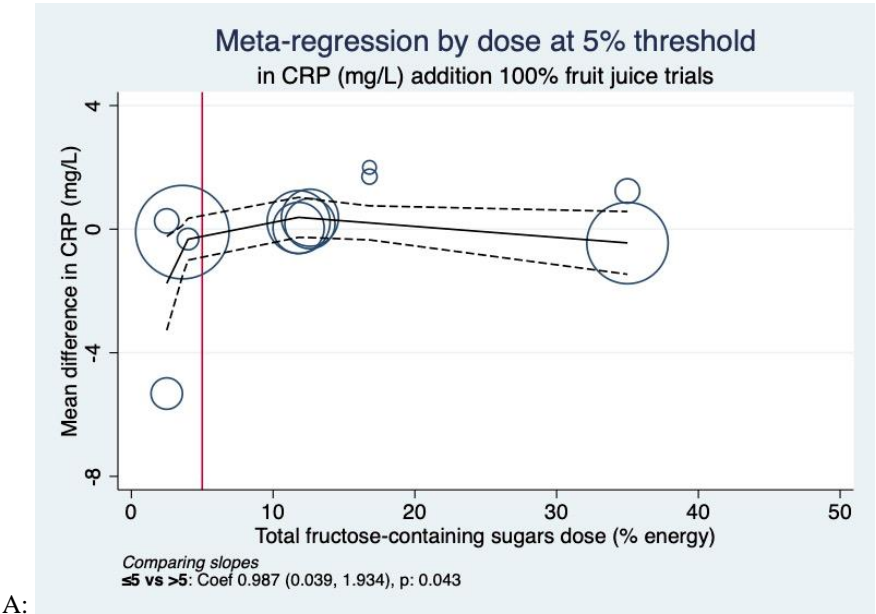

A:

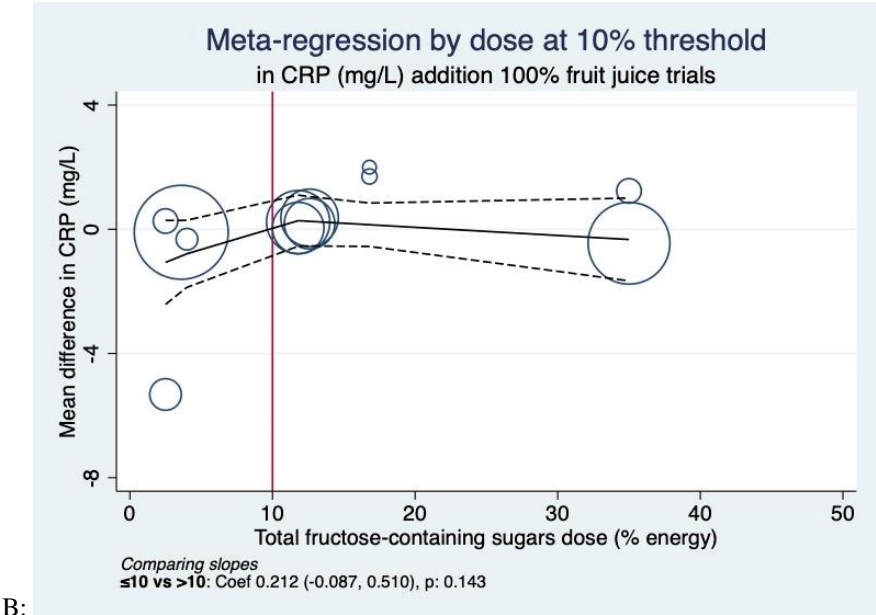

B:

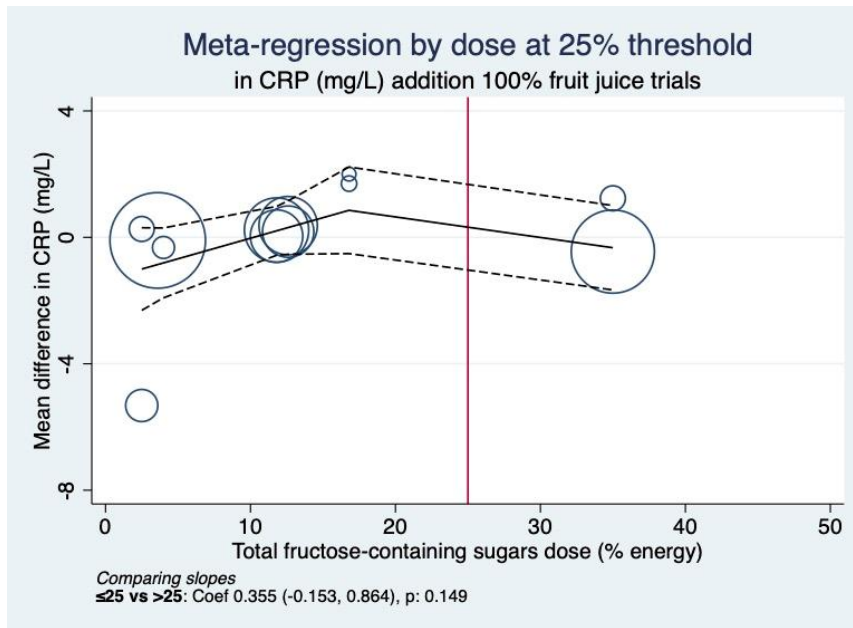

C:

Coef=coefficient; CRP= C reactive protein; %E=percentage of total energy intake; p-val=p-value

Individual trials are represented by the circles, with their weight in the overall analysis represented by the size of the circles. The straight line represents the estimate dose response for amount of fructose-containing sugars consumed (% of total energy intake) and the dashed lines represent the upper and lower 95% confidence intervals.

Panel A: A= 5% threshold for 100% fruit juice trials; B = 10% threshold for 100% fruit juice trials; C= 25% threshold for 100% fruit juice trials

Supplemental Figure S81: Non-linear dose-response analysis using public thresholds of 5%, 10%, and 25% of energy for the effect of fruit on CRP (mg/L) in addition trials

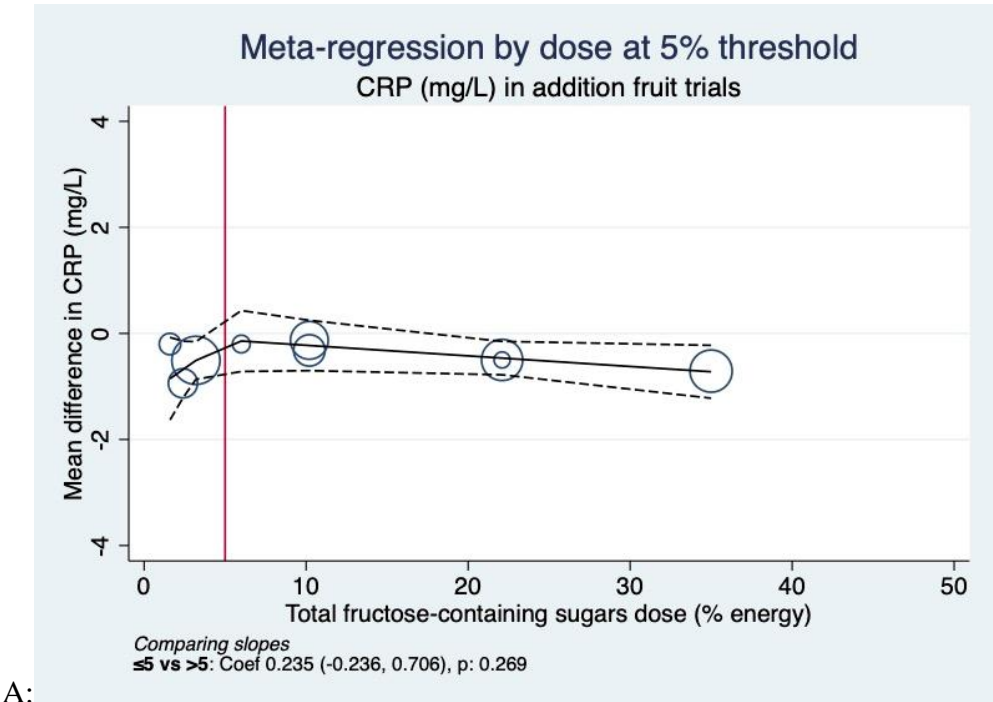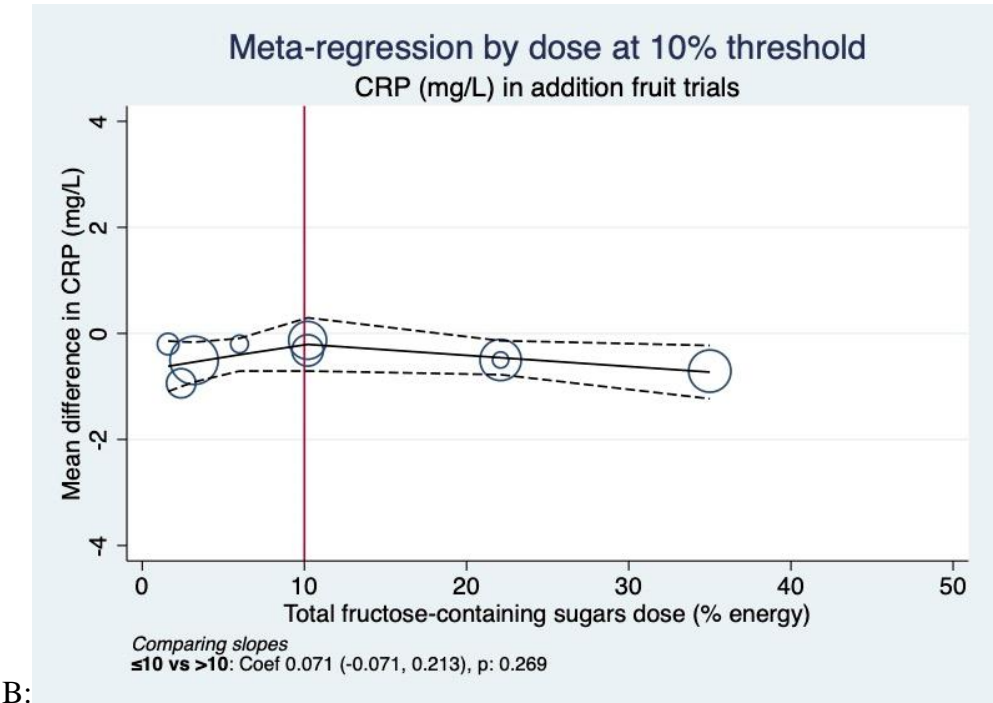



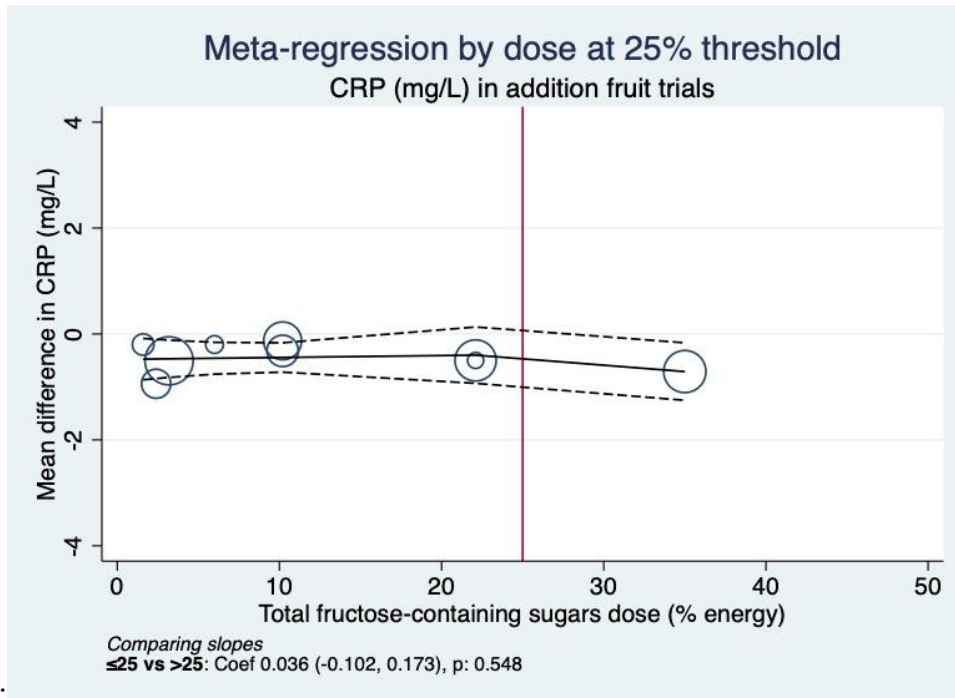

C:

Coef=coefficient; CRP= C reactive protein; %E=percentage of total energy intake; p-val=p-value

Individual trials are represented by the circles, with their weight in the overall analysis represented by the size of the circles. The straight line represents the estimate dose response for amount of fructose-containing sugars consumed (% of total energy intake) and the dashed lines represent the upper and lower 95% confidence intervals.

Panel A: 5% threshold for fruit trials; B= 10% threshold for fruit trials; C = 25% threshold for fruit trials

**Supplemental Figure S82: Linear and non-linear meta-regression analyses for the effect of important food sources of fructose-containing sugars on TNF- $\alpha$  (pg/mL) in substitution trials.**

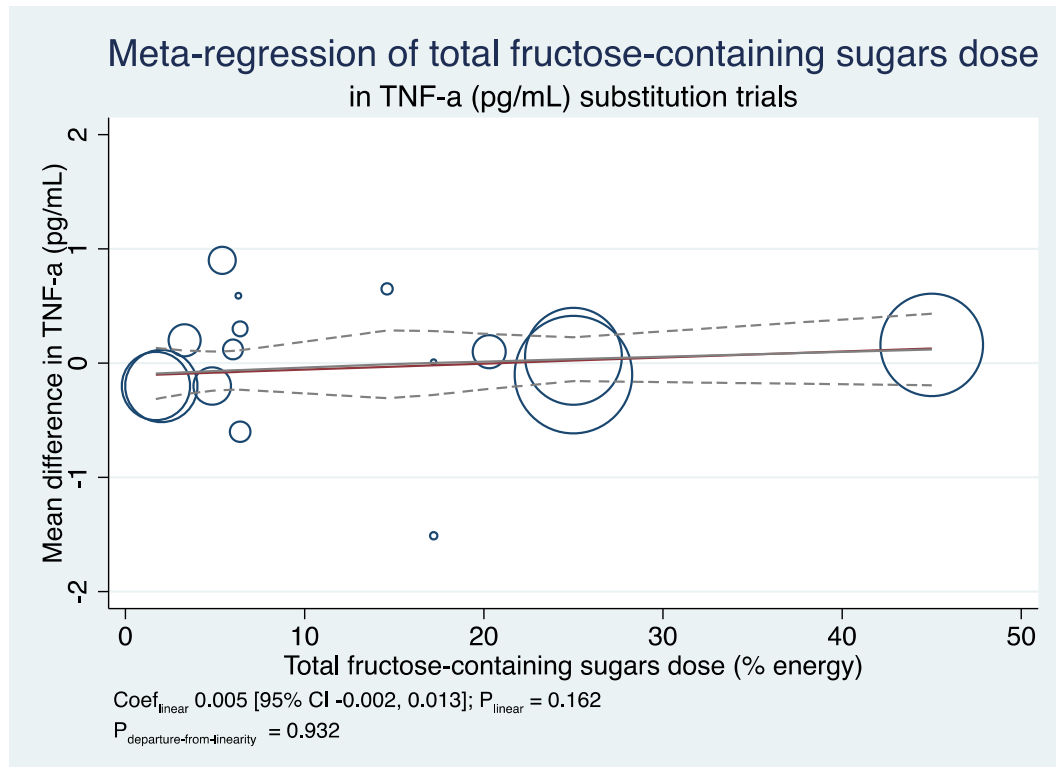

CI=confidence interval; coef=coefficient; E=energy; TNF- $\alpha$ = tumour necrosis factor-alpha

Individual trials are represented by the circles, with their weight in the overall analysis represented by the size of the circles. The straight line represents the estimate dose response for amount of fructose-containing sugars consumed (% of total energy intake) and the dashed lines represent the upper and lower 95% confidence intervals.

**Supplemental Figure S83: Linear and non-linear meta-regression analyses for the effect of important food sources of fructose-containing sugars on TNF- $\alpha$  (pg/mL) in addition trials**

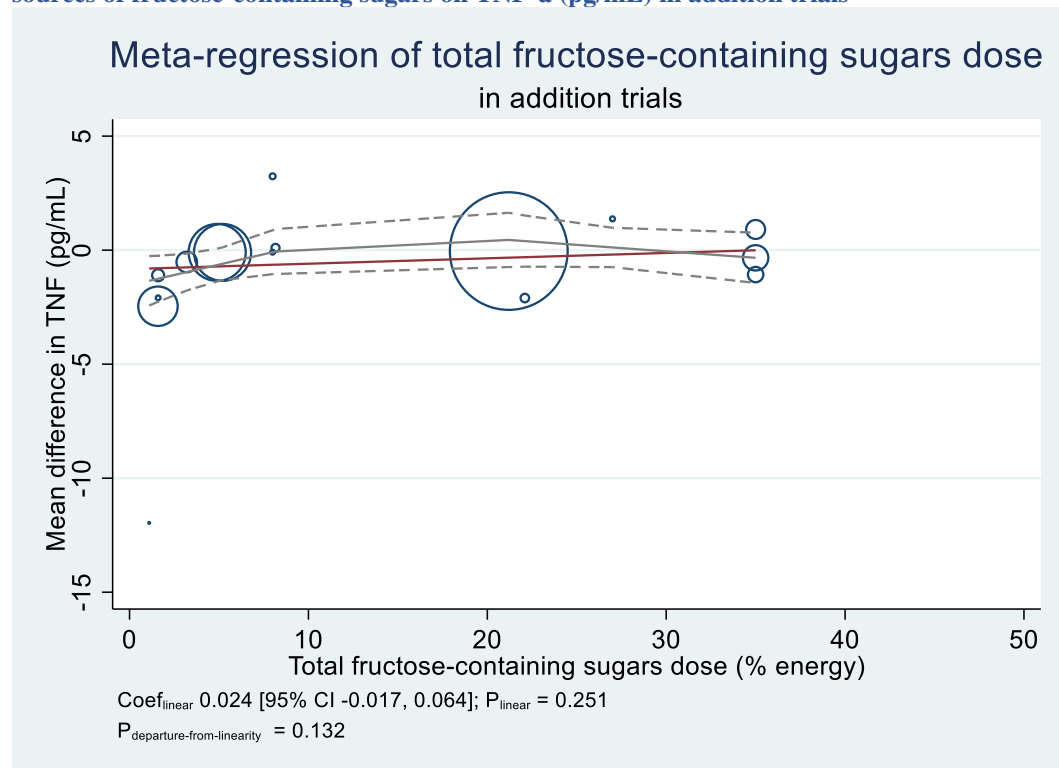

CI=confidence interval; coef=coefficient; E=energy; TNF- $\alpha$ = tumour necrosis factor-alpha  
Individual trials are represented by the circles, with their weight in the overall analysis represented by the size of the circles. The straight line represents the estimate dose response for amount of fructose-containing sugars consumed (% of total energy intake) and the dashed lines represent the upper and lower 95% confidence intervals.

**Supplemental Figure S84: Linear and non-linear meta-regression analyses for the effect of important food sources of fructose-containing sugars on IL-6 (pg/mL) in substitution trials.**

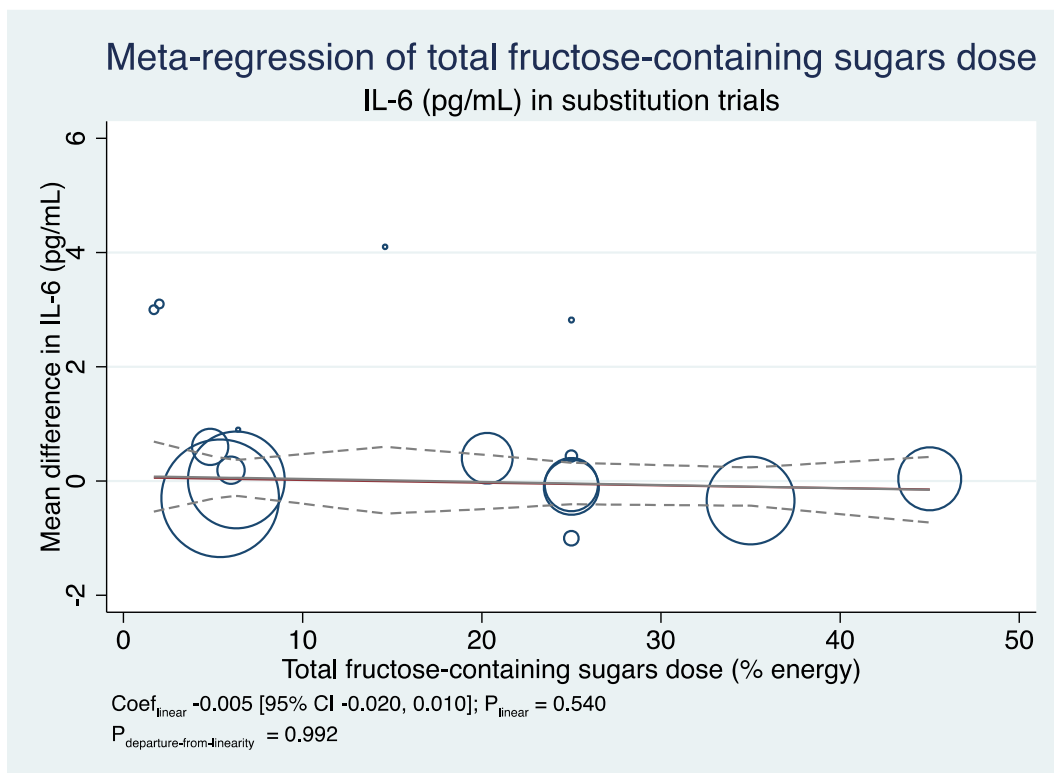

CI=confidence interval; coef=coefficient; E=energy; IL-6= interleukin-6

Individual trials are represented by the circles, with their weight in the overall analysis represented by the size of the circles. The straight line represents the estimate dose response for amount of fructose-containing sugars consumed (% of total energy intake) and the dashed lines represent the upper and lower 95% confidence intervals.

**Supplemental Figure S85: Linear and non-linear meta-regression analyses for the effect of important food sources of fructose-containing sugars on IL-6 (pg/mL) in addition trials**

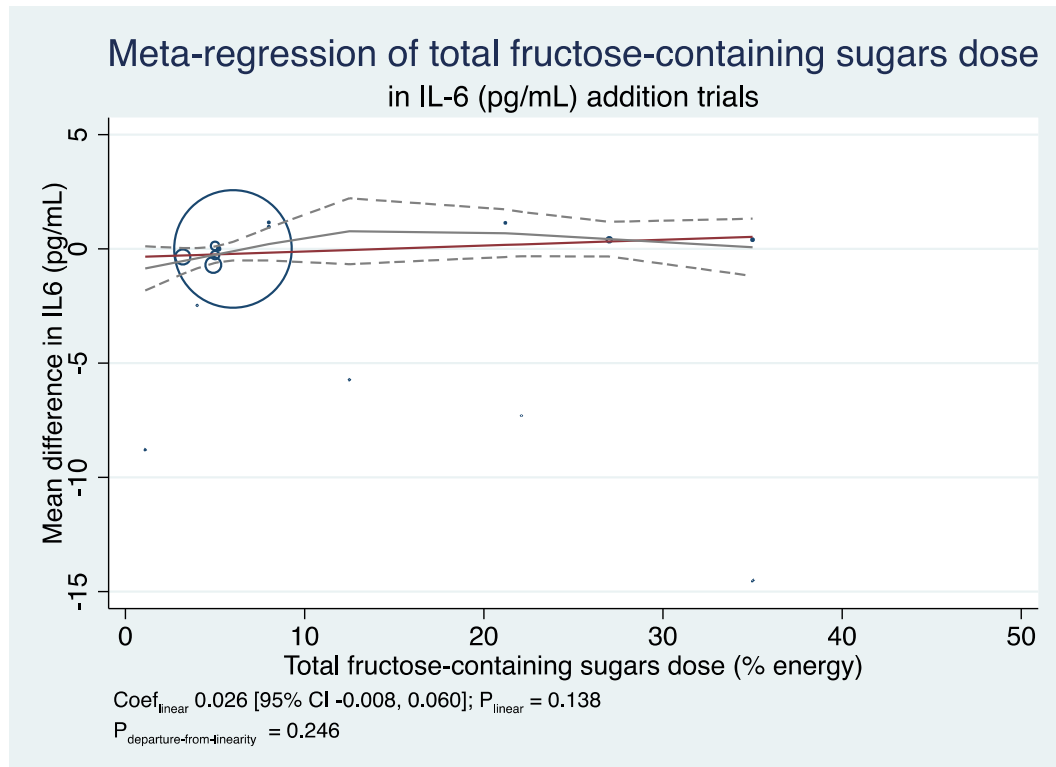

CI=confidence interval; coef=coefficient; E=energy; IL-6=interleukin-6

Individual trials are represented by the circles, with their weight in the overall analysis represented by the size of the circles. The straight line represents the estimate dose response for amount of fructose-containing sugars consumed (% of total energy intake) and the dashed lines represent the upper and lower 95% confidence intervals.

Supplemental Figure S86: Non-linear dose-response analysis using public thresholds of 5% (panel A), 10% (panel B), and 25% (panel C) of energy for the effect of important food sources of fructose-containing sugars on TNF- $\alpha$  (pg/mL) in substitution trials

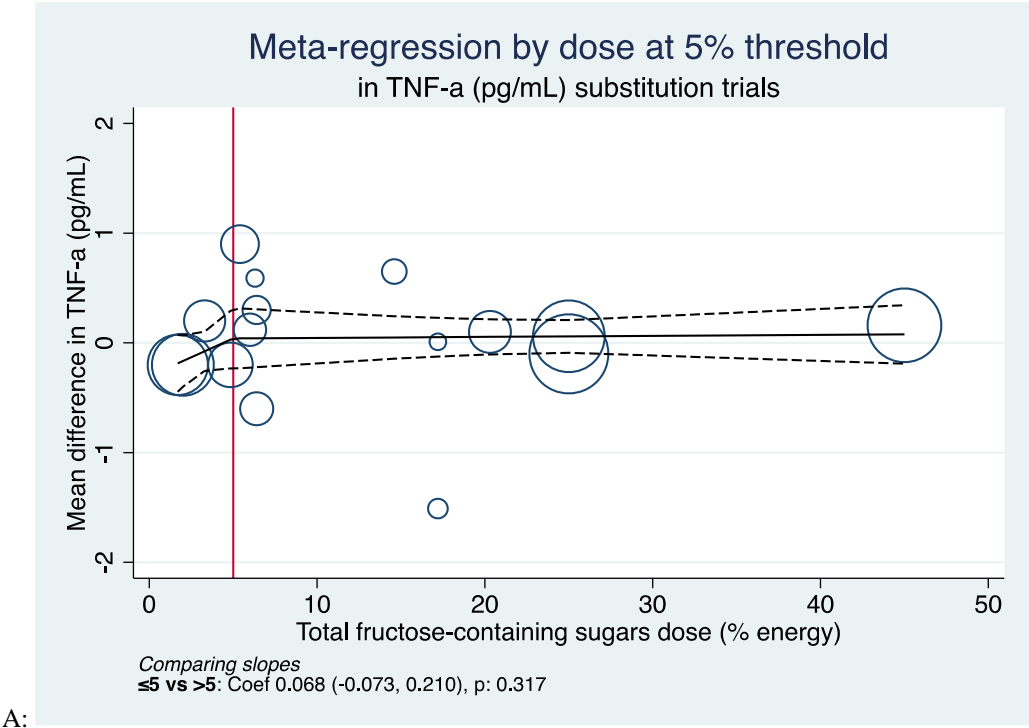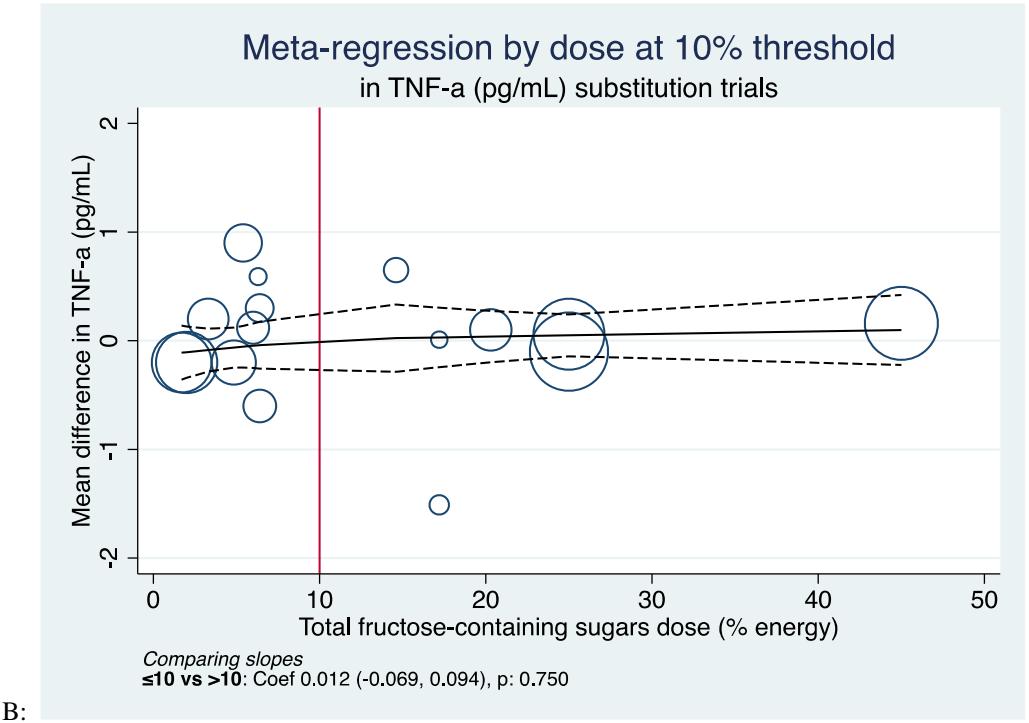

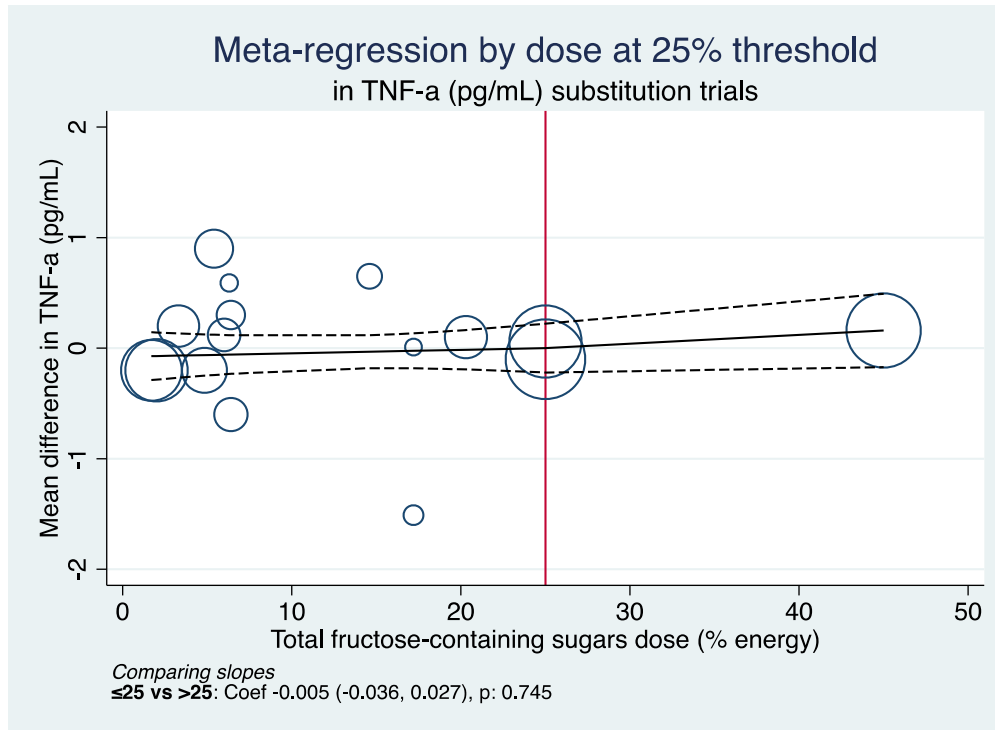

C:

Coef=coefficient; %E=percentage of total energy intake; TNF-a= tumour necrosis factor-alpha; p-val= p-value  
 Individual trials are represented by the circles, with their weight in the overall analysis represented by the size of the circles. The straight line represents the estimate dose response for amount of fructose-containing sugars consumed (% of total energy intake) and the dashed lines represent the upper and lower 95% confidence intervals.  
 Panel A: 5% threshold; B: 10% threshold; C: 25% threshold.

**Supplemental Figure S87: Non-linear dose-response analysis using public thresholds of 5% (panel A), 10% (panel B), and 25% (panel C) of energy for the effect of important food sources of fructose-containing sugars on TNF- $\alpha$  (pg/mL) in addition trials**

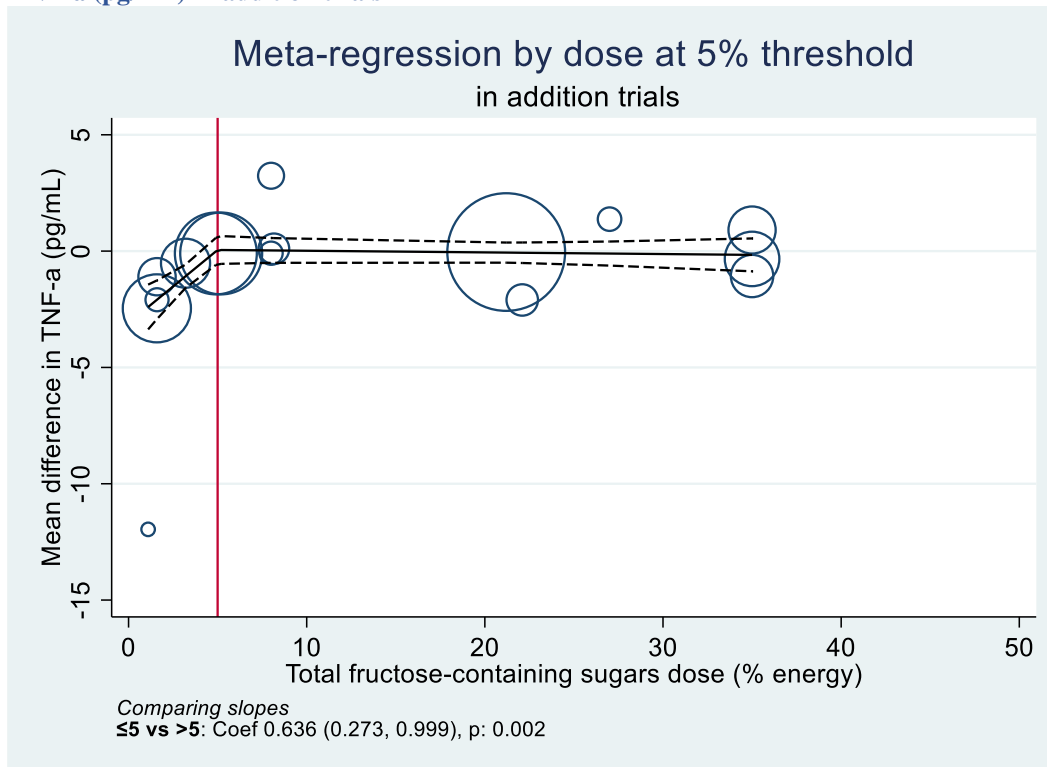

A:

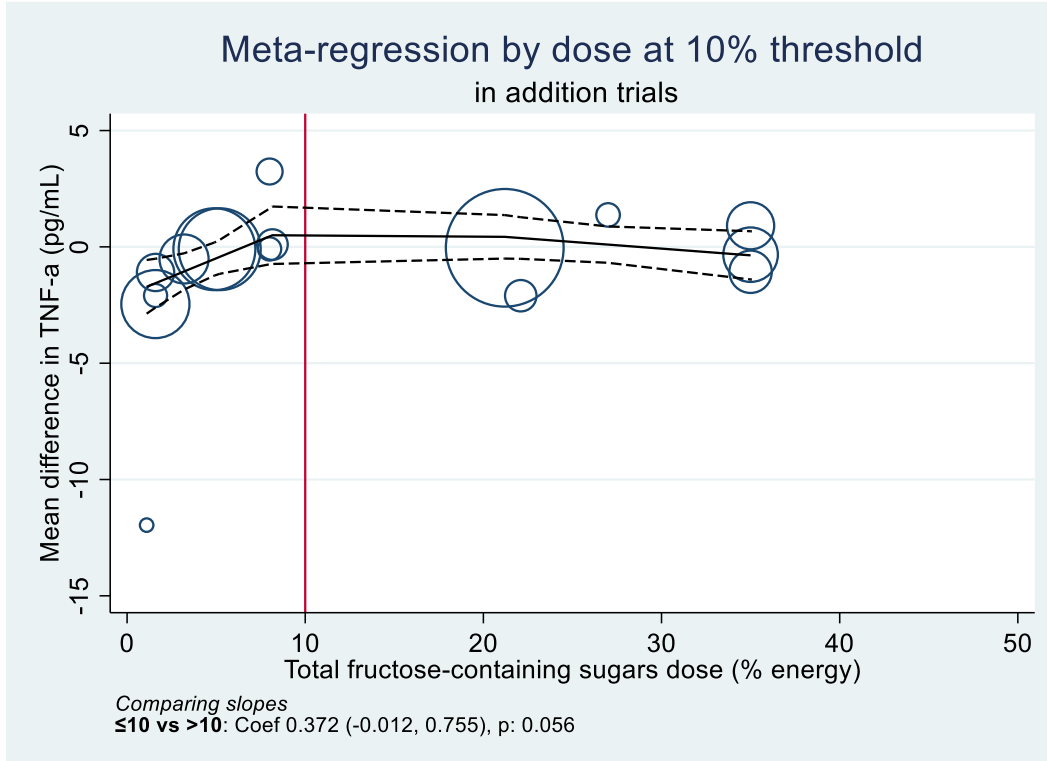

B:



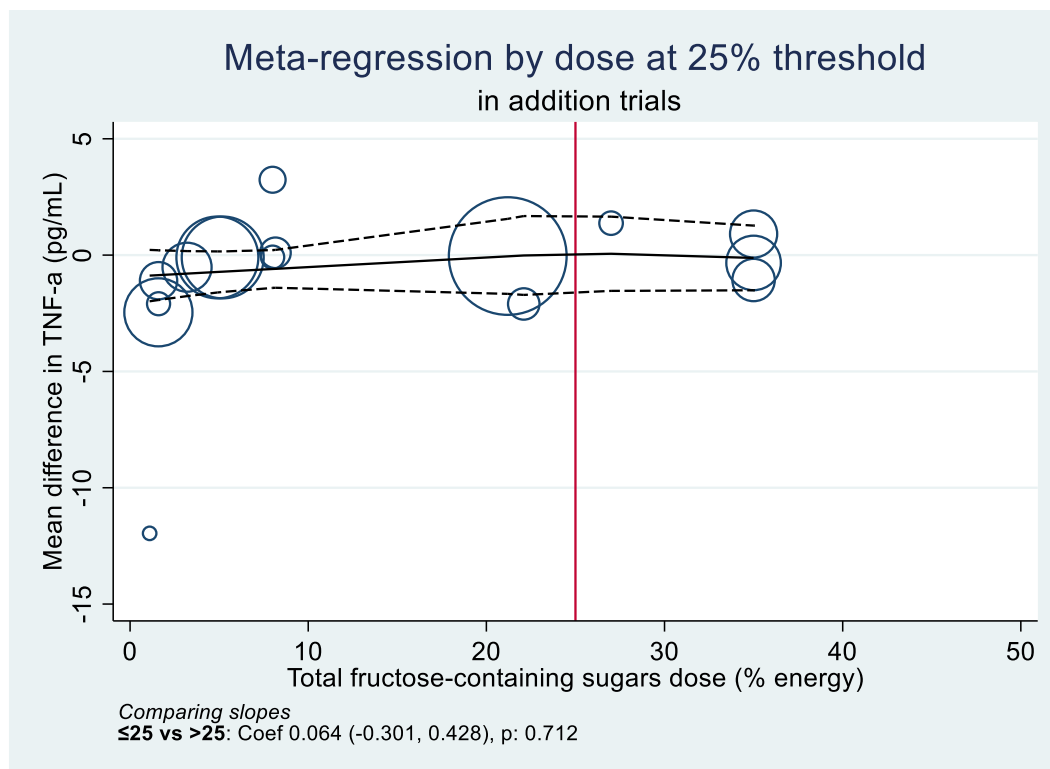

C:

Coef=coefficient; %E=percentage of total energy intake; TNF-a= tumour necrosis factor-alpha; p-val= p-value  
 Individual trials are represented by the circles, with their weight in the overall analysis represented by the size of the circles. The straight line represents the estimate dose response for amount of fructose-containing sugars consumed (% of total energy intake) and the dashed lines represent the upper and lower 95% confidence intervals.  
 Panel A: 5% threshold; B: 10% threshold; C: 25% threshold.

Supplemental Figure S88: Non-linear dose-response analysis using public thresholds of 5% (panel A), 10% (panel B), and 25% (panel C) of energy for the effect of important food sources of fructose-containing sugars on IL-6 (pg/mL) in substitution trials

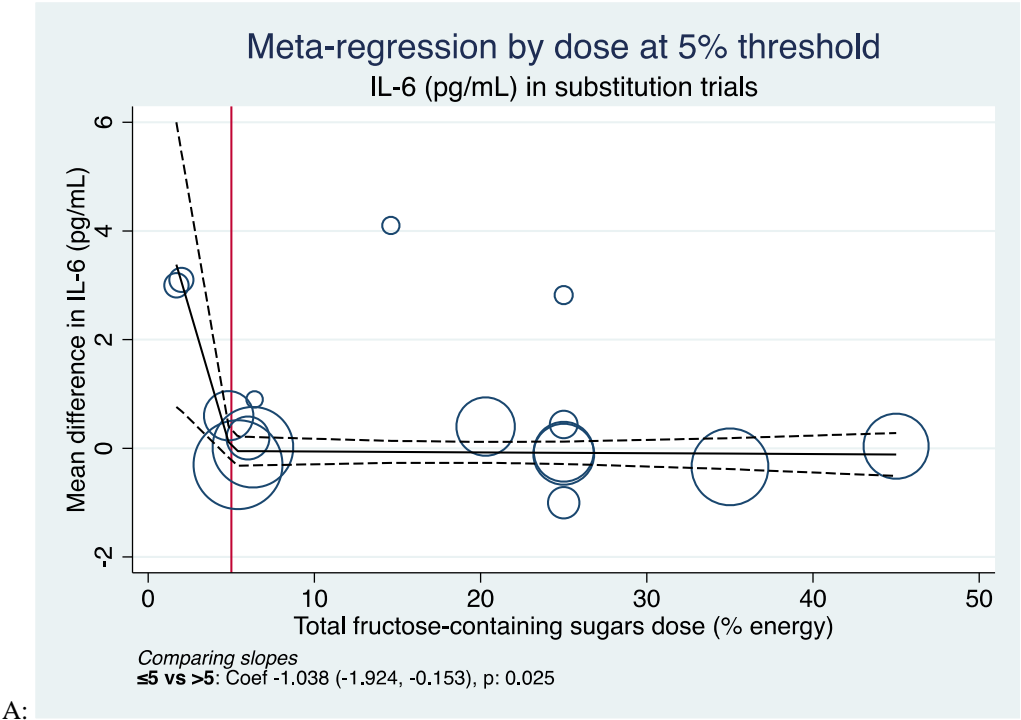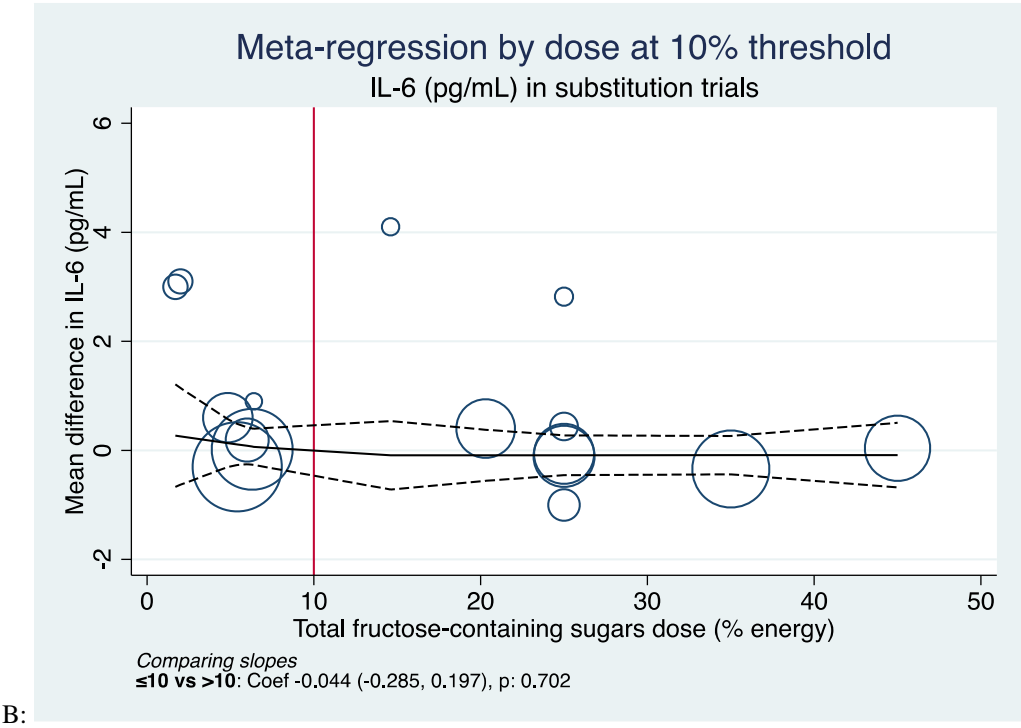

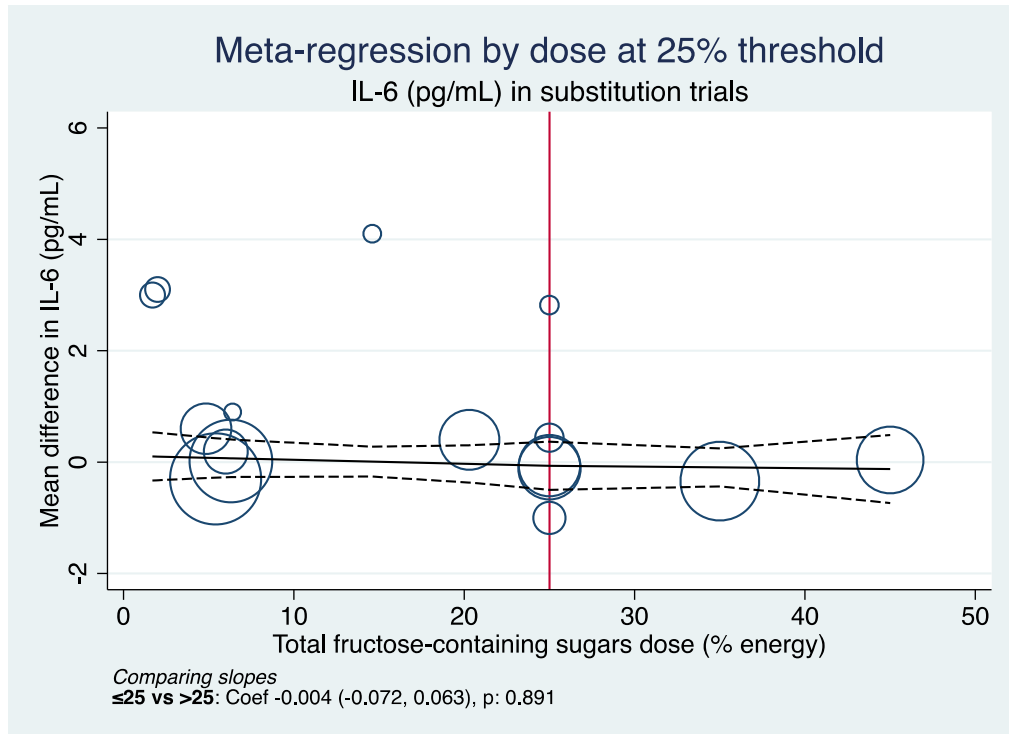

C:

Coef=coefficient; %E=percentage of total energy intake; IL-6= interleukin-6; p-val= p-value

Individual trials are represented by the circles, with their weight in the overall analysis represented by the size of the circles. The straight line represents the estimate dose response for amount of fructose-containing sugars consumed (% of total energy intake) and the dashed lines represent the upper and lower 95% confidence intervals.

Panel A: 5% threshold; B: 10% threshold; C: 25% threshold.

Supplemental Figure S89: Non-linear dose-response analysis using public thresholds of 5% (panel A), 10% (panel B), and 25% (panel C) of energy for the effect of important food sources of fructose-containing sugars on IL-6 (pg/mL) addition trials

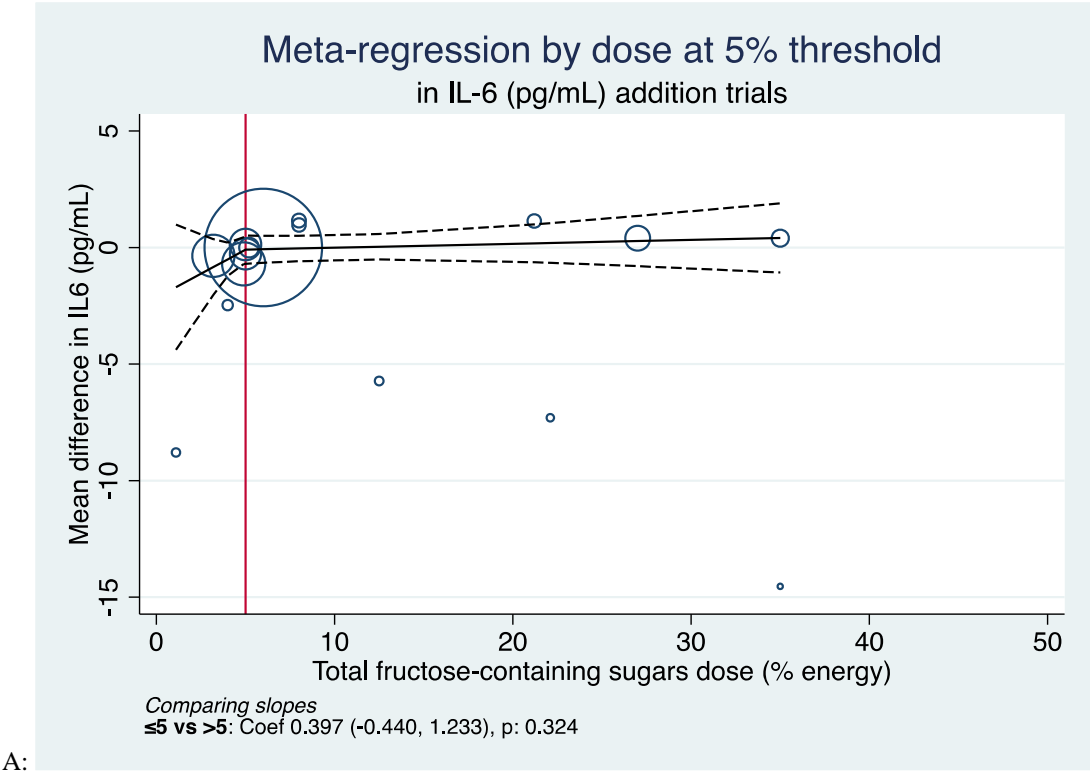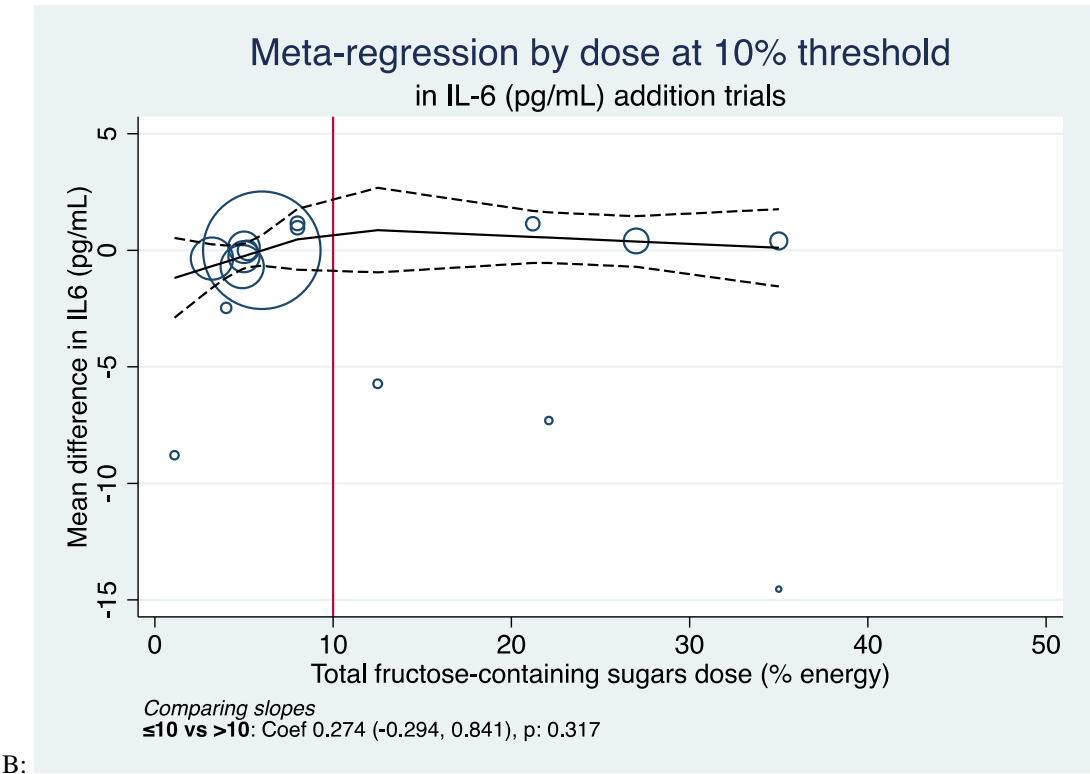

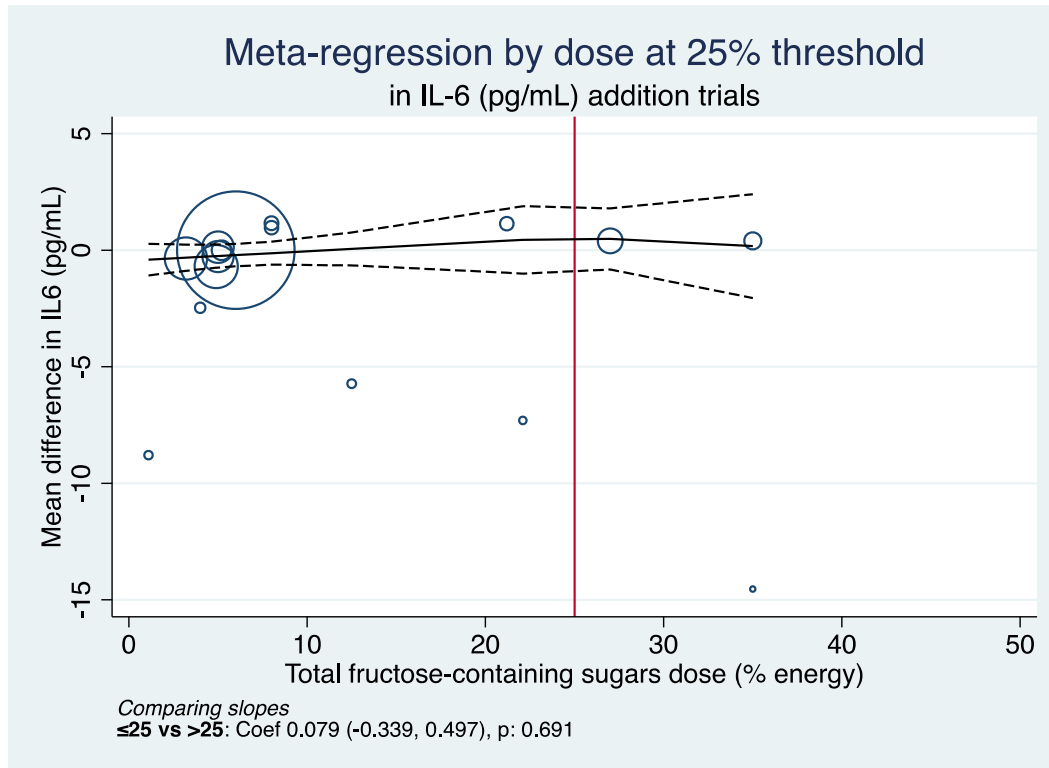

C:

Coef=coefficient; %E=percentage of total energy intake; IL-6= interleukin-6; p-val= p-value

Individual trials are represented by the circles, with their weight in the overall analysis represented by the size of the circles. The straight line represents the estimate dose response for amount of fructose-containing sugars consumed (% of total energy intake) and the dashed lines represent the upper and lower 95% confidence intervals.

Panel A: 5% threshold; B: 10% threshold; C: 25% threshold.

**Supplemental Figure S90: Publication bias funnel plots for the effect of important food sources of fructose-containing sugars on CRP (mg/L) in substitution trials**

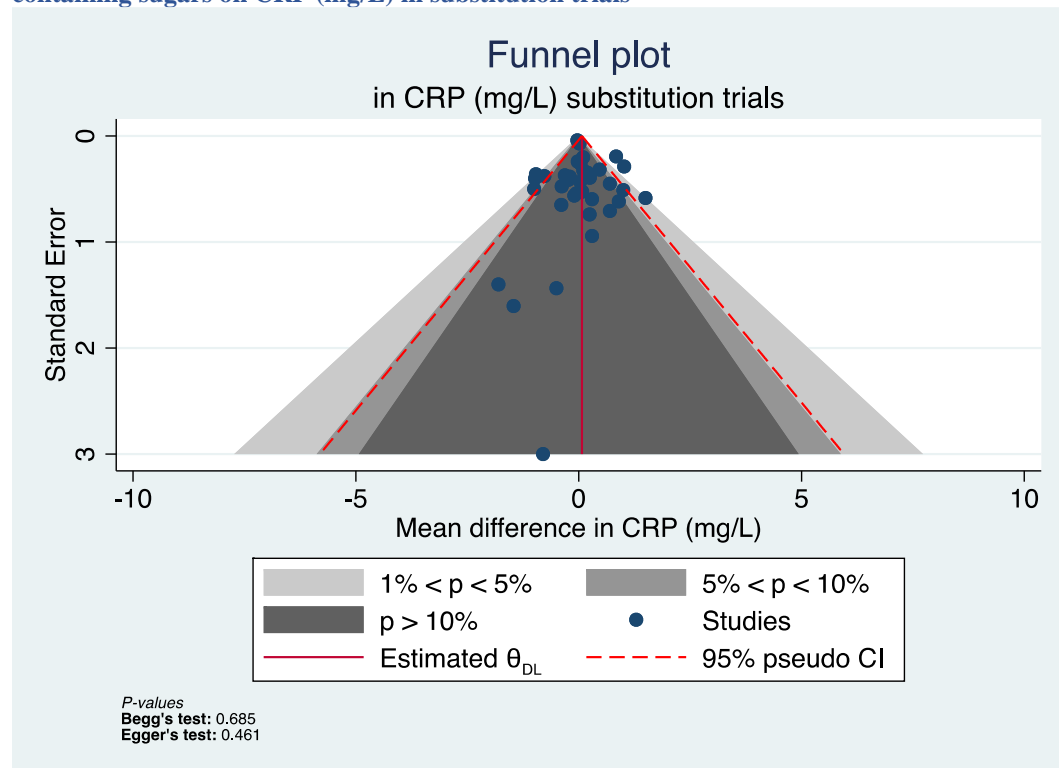

CI=confidence interval; CRP= C reactive protein

Contour-enhanced funnel plot is a scatterplot of each trial weighted mean difference on the x-axis with the standard error representing precision on the y-axis. The vertical solid red line represents the pooled effect estimate and the dashed red lines represent the pseudo-95% confidence limits. The blue dots represent individual trials. The contour regions define the regions for the test of significance of individual trial effect size for a given p-value range >0.100 (dark grey), 0.500 to <0.100 (medium grey), 0.010 to <0.500 (light grey), <0.0100 (white)]. The contour-enhanced funnel plots may suggest funnel-plot asymmetry is due to publication bias when less precise (smaller) trials are missing in the non-significant regions. Quantitative assessment of publication bias was also performed using Egger's and Begg's tests set at a significance level of  $P < 0.100$ .

**Supplemental Figure S91: Publication bias funnel plots for the effect of important food sources of fructose-containing sugars on CRP (mg/L) in addition trials**

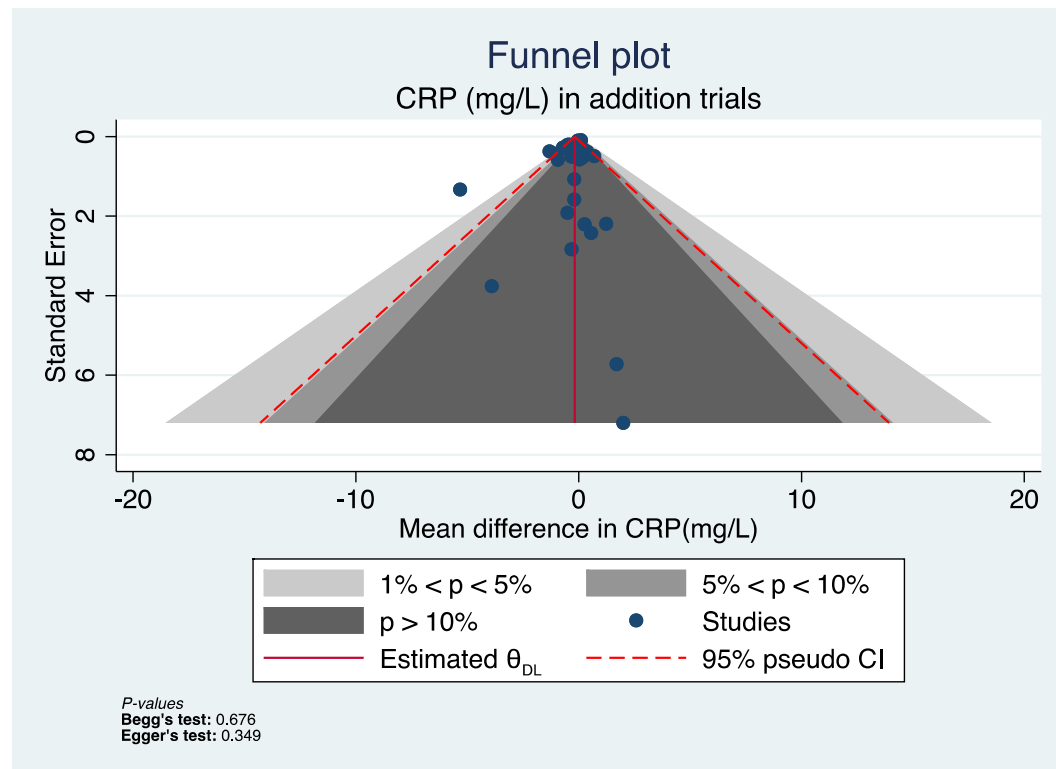

CI=confidence interval; CRP= C reactive protein

Contour-enhanced funnel plot is a scatterplot of each trial weighted mean difference on the x-axis with the standard error representing precision on the y-axis. The vertical solid red line represents the pooled effect estimate and the dashed red lines represent the pseudo-95% confidence limits. The blue dots represent individual trials. The contour regions define the regions for the test of significance of individual trial effect size for a given p-value range >0.100 (dark grey), 0.500 to <0.100 (medium grey), 0.010 to <0.500 (light grey), <0.0100 (white)]. The contour-enhanced funnel plots may suggest funnel-plot asymmetry is due to publication bias when less precise (smaller) trials are missing in the non-significant regions. Quantitative assessment of publication bias was also performed using Egger's and Begg's tests set at a significance level of  $P < 0.100$ .

**Supplemental Figure S92: Publication bias funnel plots for the effect of SSBs on CRP (mg/L) in substitution trials**

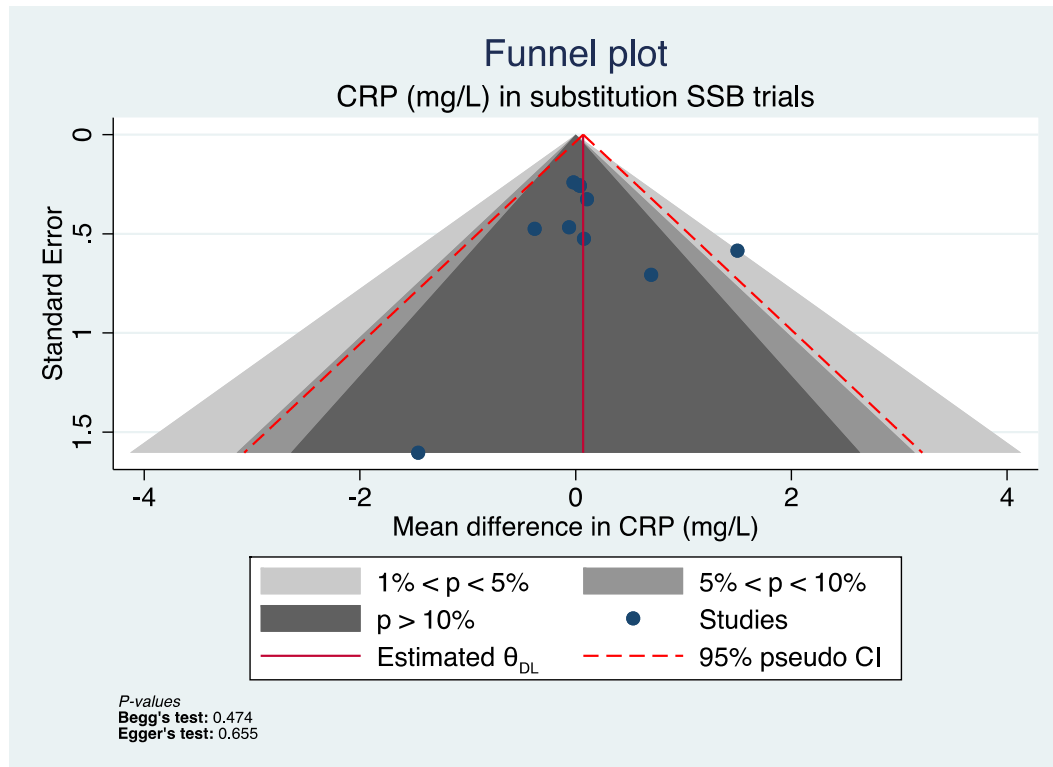

CI=confidence interval; CRP= C reactive protein; SSB= sugar sweetened beverages

Contour-enhanced funnel plot is a scatterplot of each trial weighted mean difference on the x-axis with the standard error representing precision on the y-axis. The vertical solid red line represents the pooled effect estimate and the dashed red lines represent the pseudo-95% confidence limits. The blue dots represent individual trials. The contour regions define the regions for the test of significance of individual trial effect size for a given p-value range >0.100 (dark grey), 0.500 to <0.100 (medium grey), 0.010 to <0.500 (light grey), <0.0100 (white)]. The contour-enhanced funnel plots may suggest funnel-plot asymmetry is due to publication bias when less precise (smaller) trials are missing in the non-significant regions. Quantitative assessment of publication bias was also performed using Egger's and Begg's tests set at a significance level of  $P < 0.100$ .



**Supplemental Figure S93: Publication bias funnel plots for the effect of 100% fruit juice on CRP (mg/L) in addition trials**

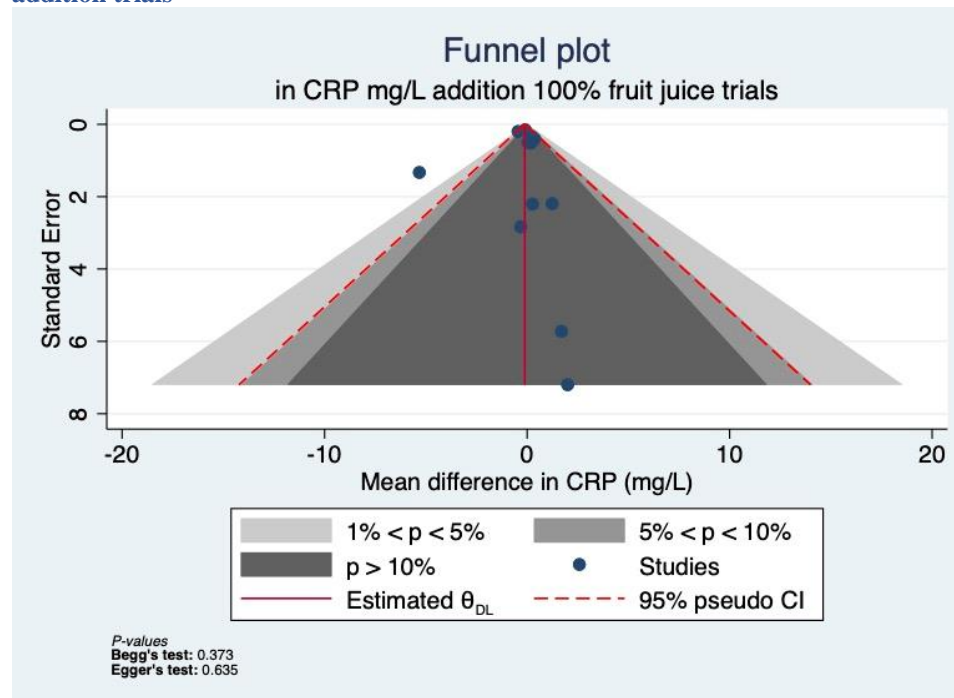

CI=confidence interval; CRP= C reactive protein

Contour-enhanced funnel plot is a scatterplot of each trial weighted mean difference on the x-axis with the standard error representing precision on the y-axis. The vertical solid red line represents the pooled effect estimate and the dashed red lines represent the pseudo-95% confidence limits. The blue dots represent individual trials. The contour regions define the regions for the test of significance of individual trial effect size for a given p-value range >0.100 (dark grey), 0.500 to <0.100 (medium grey), 0.010 to <0.500 (light grey), <0.0100 (white)]. The contour-enhanced funnel plots may suggest funnel-plot asymmetry is due to publication bias when less precise (smaller) trials are missing in the non-significant regions. Quantitative assessment of publication bias was also performed using Egger's and Begg's tests set at a significance level of  $P < 0.100$ .

**Supplemental Figure S94: Publication bias funnel plots for the effect of important food sources of fructose-containing sugars on TNF- $\alpha$  (pg/mL) in substitution trials**

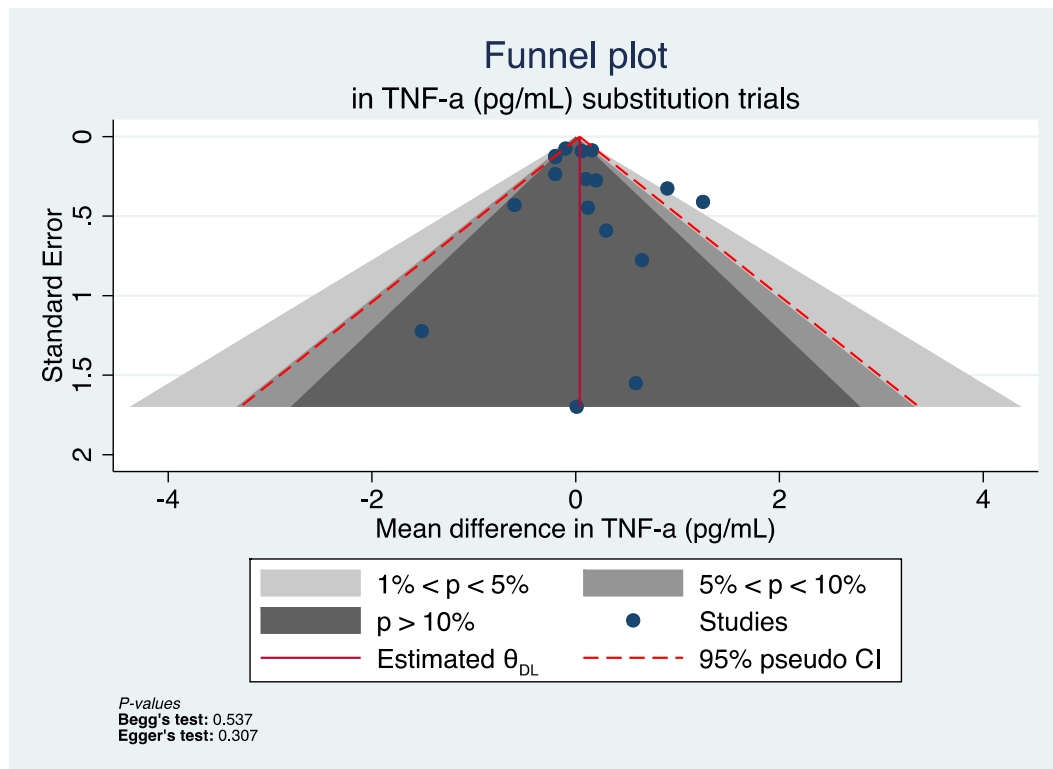

CI=confidence interval; TNF- $\alpha$ = tumour necrosis factor-alpha

Contour-enhanced funnel plot is a scatterplot of each trial weighted mean difference on the x-axis with the standard error representing precision on the y-axis. The vertical solid red line represents the pooled effect estimate and the dashed red lines represent the pseudo-95% confidence limits. The blue dots represent individual trials. The contour regions define the regions for the test of significance of individual trial effect size for a given p-value range >0.100 (dark grey), 0.500 to <0.100 (medium grey), 0.010 to <0.500 (light grey), <0.0100 (white)]. The contour-enhanced funnel plots may suggest funnel-plot asymmetry is due to publication bias when less precise (smaller) trials are missing in the non-significant regions. Quantitative assessment of publication bias was also performed using Egger's and Begg's tests set at a significance level of  $P < 0.100$ .

**Supplemental Figure S95: Publication bias funnel plots for the effect of important food sources of fructose-containing sugars on TNF- $\alpha$  (pg/mL) in addition trials**

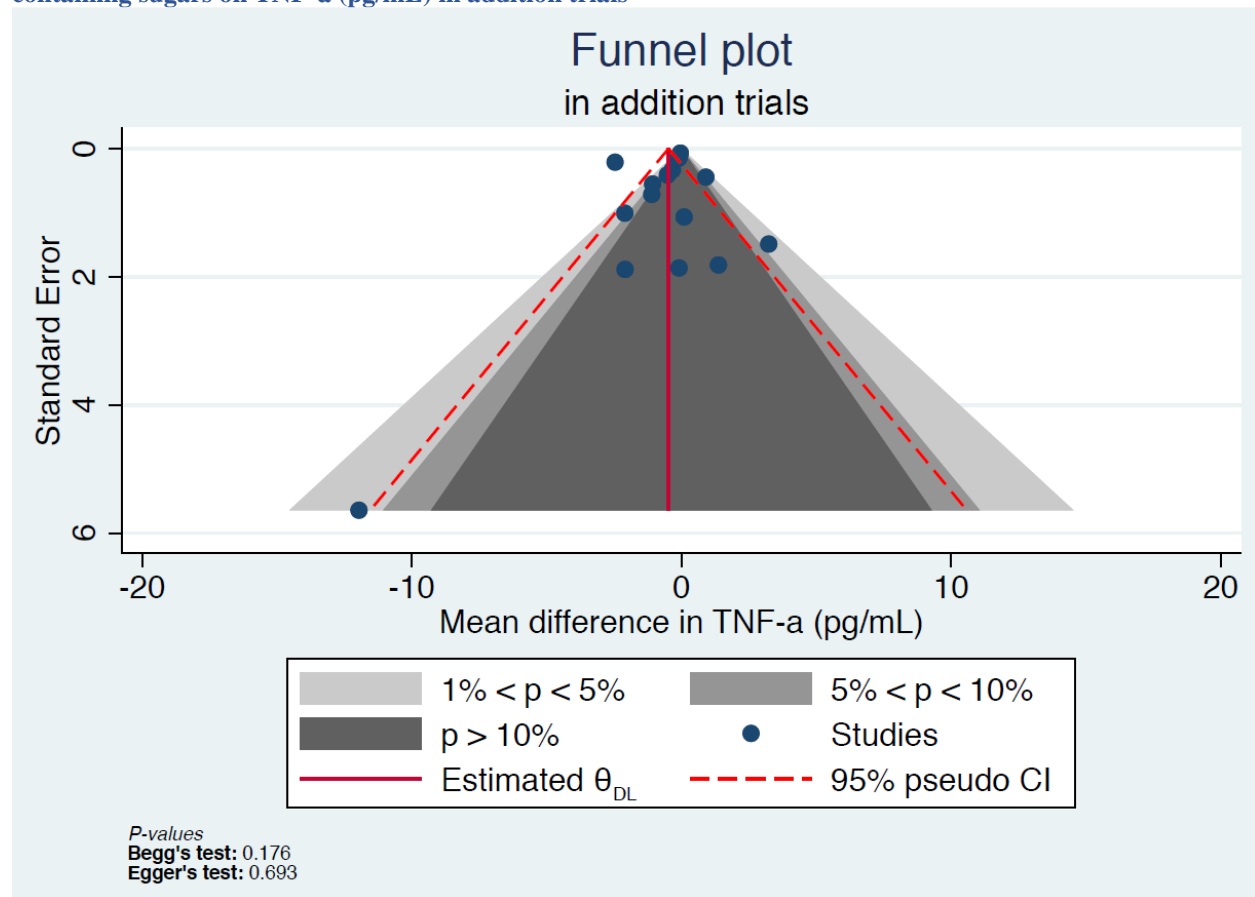

CI=confidence interval; TNF- $\alpha$ = tumour necrosis factor- $\alpha$

Contour-enhanced funnel plot is a scatterplot of each trial weighted mean difference on the x-axis with the standard error representing precision on the y-axis. The vertical solid red line represents the pooled effect estimate and the dashed red lines represent the pseudo-95% confidence limits. The blue dots represent individual trials. The contour regions define the regions for the test of significance of individual trial effect size for a given p-value range >0.100 (dark grey), 0.500 to <0.100 (medium grey), 0.010 to <0.500 (light grey), <0.0100 (white)]. The contour-enhanced funnel plots may suggest funnel-plot asymmetry is due to publication bias when less precise (smaller) trials are missing in the non-significant regions. Quantitative assessment of publication bias was also performed using Egger's and Begg's tests set at a significance level of  $P < 0.100$ .

**Supplemental Figure S96: Publication bias funnel plots for the effect of important food sources of fructose-containing sugars on IL-6 (pg/mL) in substitution trials**

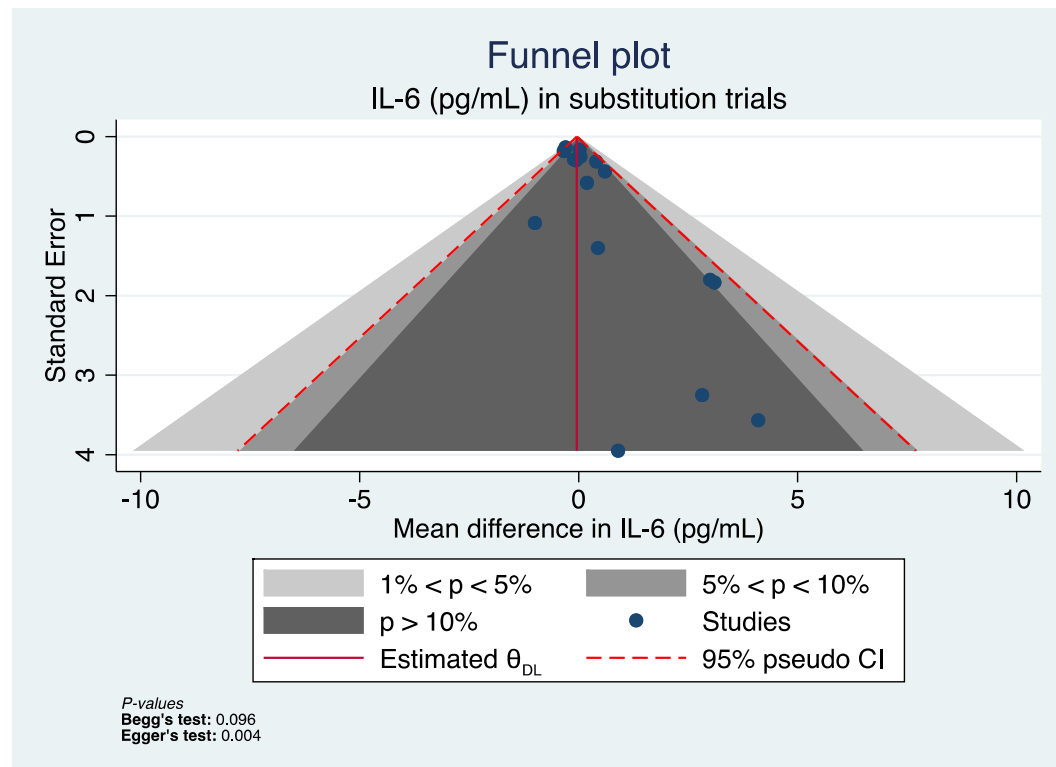

CI=confidence interval; IL-6 = interleukin-6

Contour-enhanced funnel plot is a scatterplot of each trial weighted mean difference on the x-axis with the standard error representing precision on the y-axis. The vertical solid red line represents the pooled effect estimate and the dashed red lines represent the pseudo-95% confidence limits. The blue dots represent individual trials. The contour regions define the regions for the test of significance of individual trial effect size for a given p-value range >0.100 (dark grey), 0.500 to <0.100 (medium grey), 0.010 to <0.500 (light grey), <0.0100 (white)]. The contour-enhanced funnel plots may suggest funnel-plot asymmetry is due to publication bias when less precise (smaller) trials are missing in the non-significant regions. Quantitative assessment of publication bias was also performed using Egger's and Begg's tests set at a significance level of  $P < 0.100$ .

**Supplemental Figure S97: Publication bias funnel plots for the effect of important food sources of fructose-containing sugars on IL-6 (pg/mL) in addition trials**

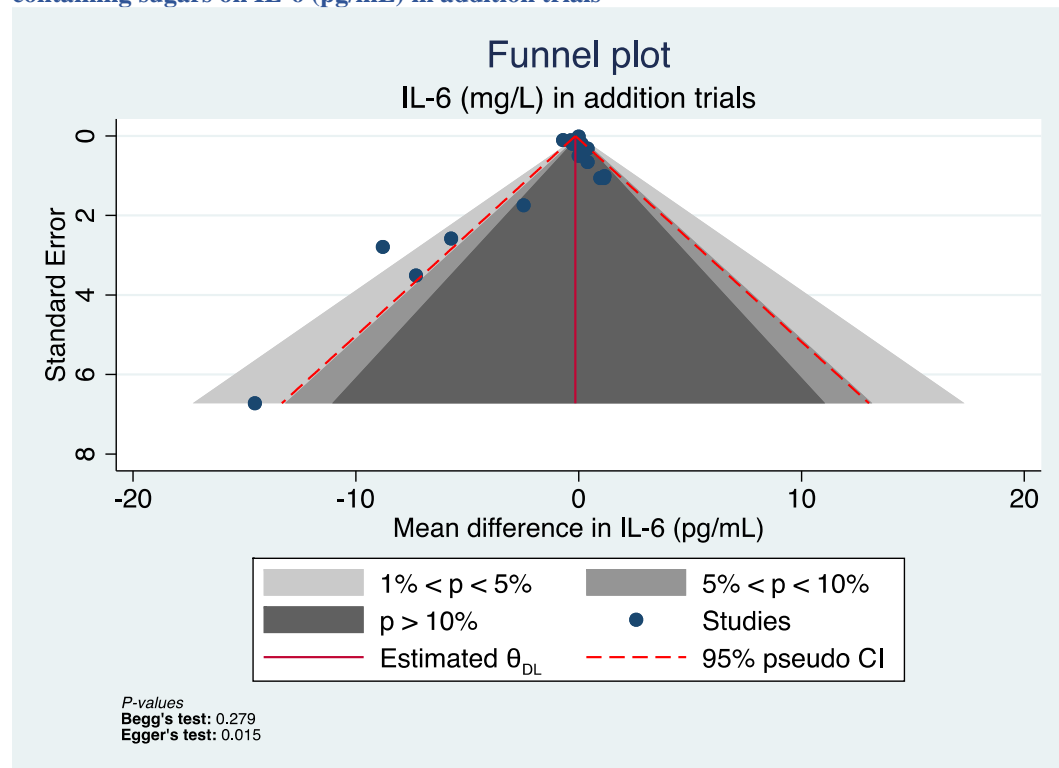

CI=confidence interval; IL-6= interleukin-6

Contour-enhanced funnel plot is a scatterplot of each trial weighted mean difference on the x-axis with the standard error representing precision on the y-axis. The vertical solid red line represents the pooled effect estimate and the dashed red lines represent the pseudo-95% confidence limits. The blue dots represent individual trials. The contour regions define the regions for the test of significance of individual trial effect size for a given p-value range >0.100 (dark grey), 0.500 to <0.100 (medium grey), 0.010 to <0.500 (light grey), <0.0100 (white)]. The contour-enhanced funnel plots may suggest funnel-plot asymmetry is due to publication bias when less precise (smaller) trials are missing in the non-significant regions. Quantitative assessment of publication bias was also performed using Egger's and Begg's tests set at a significance level of  $P < 0.100$ .

**Supplemental Figure S98: Trim and Fill funnel plot for the effect of important food sources of fructose-containing sugars IL-6 (pg/mL) in substitution trials**

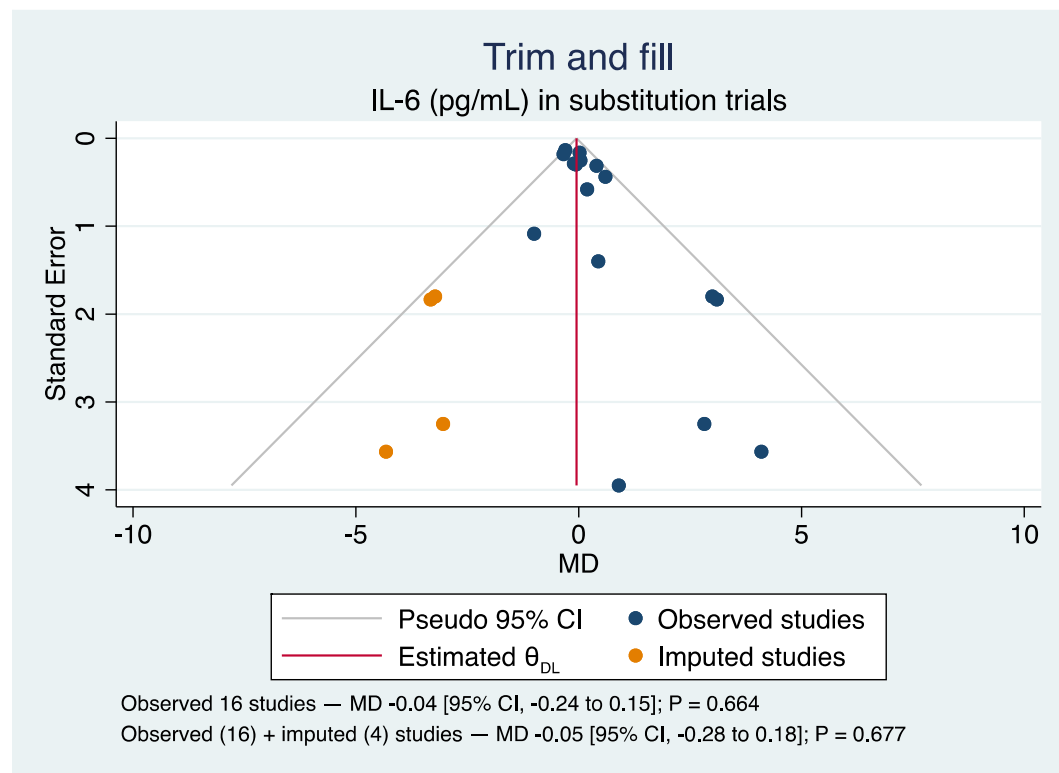

CI=confidence interval; IL-6= interleukin-6

The vertical line represents the pooled effect estimate expressed as standardized mean difference. The diagonal lines represent the pseudo-95% confidence limits, the blue circles represent the effect estimate for each included study, and orange circles represent the effect estimate for each imputed “missed” study. Imputed random standardized mean difference is provided; when the imputed result differs from the primary result in either significance or magnitude ( $>1 \text{ MID} = 0.18 \text{ pg/mL}$  for IL-6), this is considered evidence of small-study effects.

**Supplemental Figure S99: Trim and Fill funnel plot for the effect of important food sources of fructose-containing sugars IL-6 (pg/mL) in addition trials**

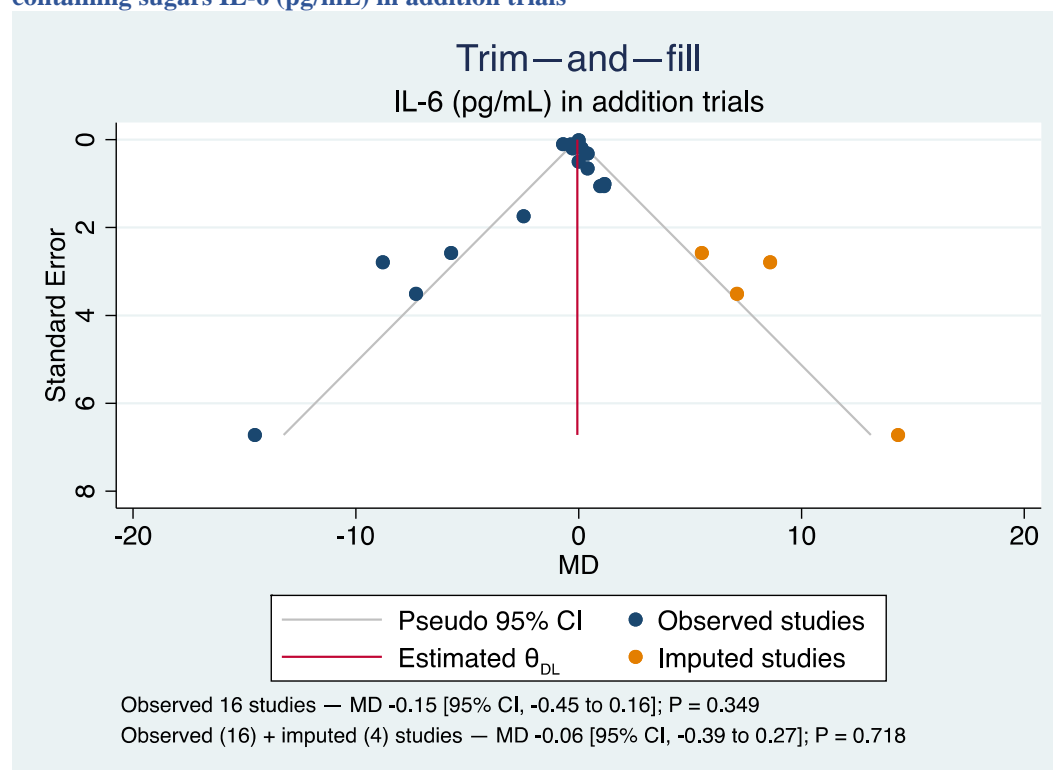

CI=confidence interval; IL-6= interleukin-6

The vertical line represents the pooled effect estimate expressed as standardized mean difference. The diagonal lines represent the pseudo-95% confidence limits, the blue circles represent the effect estimate for each included study, and orange circles represent the effect estimate for each imputed “missed” study. Imputed random standardized mean difference is provided; when the imputed result differs from the primary result in either significance or magnitude ( $>1$  MID = 0.18 pg/mL for IL-6), this is considered evidence of small-study effects.
